# Supplementary material
Source: Research Square preprint supplement (doi:10.21203/rs.3.rs-8280185/v1)
Supplement: Supplementary file 2 [file 2cb0bca6336555c531a202e7.xlsx]

## Sheet: Phylum_Comparison
Phylum	515f_806r_Coverage_%	341f_806r_Coverage_%	Coverage_Difference_%	Primer Comparison
NAMAKO-1	100	0	-100	No coverage in 341f/806r
WS1	94.6	3.2	-91.4	515f/806r better
GN01	88.2	5.1	-83.1	515f/806r better
Archaeplastida	83.1	6.9	-76.2	515f/806r better
Asgardarchaeota	87.7	15.5	-72.1	515f/806r better
Altiarchaeota	100	46.7	-53.3	515f/806r better
Cryptophyceae	50.4	0	-50.4	No coverage in 341f/806r
SAR	84.6	48.9	-35.7	515f/806r better
Haptophyta	33.8	0	-33.8	No coverage in 341f/806r
Excavata	81.7	60.3	-21.4	515f/806r better
Aenigmarchaeota	92.5	74.8	-17.8	515f/806r better
Amorphea	69.6	58.3	-11.4	515f/806r better
Korarchaeota	96.7	88.3	-8.4	515f/806r better
Planctomycetota	95.7	89.4	-6.3	515f/806r better
FW113	100	94.7	-5.3	515f/806r better
Thermoproteota	96.2	91.2	-5	515f/806r better
Methanobacteriota	95.9	92.3	-3.5	515f/806r better
Margulisbacteria	98.9	95.4	-3.5	515f/806r better
WS2	88.1	84.7	-3.4	515f/806r better
PAUC34f	97.8	94.6	-3.2	515f/806r better
FCPU426	92.1	89.5	-2.6	515f/806r better
Nanohaloarchaeota	100	97.4	-2.6	515f/806r better
Nanoarchaeota	78.4	76.7	-1.7	515f/806r better
Armatimonadota	96.9	95.2	-1.7	515f/806r better
Halobacteriota	97.3	95.8	-1.5	515f/806r better
Marinimicrobia (SAR406 clade)	96.7	95.3	-1.4	515f/806r better
Entotheonellaeota	95.5	94.4	-1.1	515f/806r better
Hydrogenedentes	95.1	94.5	-0.6	Similar coverage
Candidatus Kryptonia	98.3	97.9	-0.5	Similar coverage
Hadarchaeota	93.6	93.4	-0.2	Similar coverage
SAR324 clade(Marine group B)	97.5	97.3	-0.2	Similar coverage
Apal-E12	66.7	66.7	0	Similar coverage
Coprothermobacterota	86.7	86.7	0	Similar coverage
CK-2C2-2	90.9	90.9	0	Similar coverage
NKB15	92.2	92.2	0	Similar coverage
GAL15	93.5	93.5	0	Similar coverage
Rs-K70 termite group	93.5	93.5	0	Similar coverage
BHI80-139	95.1	95.1	0	Similar coverage
Methylomirabilota	95.2	95.2	0	Similar coverage
Abditibacteriota	95.7	95.7	0	Similar coverage
Calditrichota	96.2	96.2	0	Similar coverage
Deferrisomatota	96.2	96.2	0	Similar coverage
Candidatus Eremiobacterota	96.7	96.7	0	Similar coverage
Candidatus Kapabacteria	96.7	96.7	0	Similar coverage
Aerophobota	97.1	97.1	0	Similar coverage
Hydrothermae	97.4	97.4	0	Similar coverage
WOR-1	97.4	97.4	0	Similar coverage
Atribacterota	97.6	97.6	0	Similar coverage
Schekmanbacteria	97.6	97.6	0	Similar coverage
LCP-89	97.9	97.9	0	Similar coverage
NB1-j	97.9	97.9	0	Similar coverage
10bav-F6	100	100	0	Similar coverage
AncK6	100	100	0	Similar coverage
Calescamantes	100	100	0	Similar coverage
Candidatus Lindowbacteria	100	100	0	Similar coverage
Chrysiogenota	100	100	0	Similar coverage
Desantisbacteria	100	100	0	Similar coverage
Dictyoglomerota	100	100	0	Similar coverage
Edwardsbacteria	100	100	0	Similar coverage
Fervidibacteria	100	100	0	Similar coverage
Firestonebacteria	100	100	0	Similar coverage
MAT-CR-M4-B07	100	100	0	Similar coverage
TA06	100	100	0	Similar coverage
Thermodesulfobiota	100	100	0	Similar coverage
Thermosulfidibacterota	100	100	0	Similar coverage
TX1A-33	100	100	0	Similar coverage
Iainarchaeota	90.5	90.5	0	Similar coverage
Nitrospinota	95.6	95.7	-0.1	Similar coverage
Campylobacterota	98.1	98.3	-0.2	Similar coverage
Thermodesulfobacteriota	96.7	96.9	-0.2	Similar coverage
Acidobacteriota	97.5	97.7	-0.2	Similar coverage
Myxococcota	95.6	96	-0.4	Similar coverage
Chloroflexota	96.7	97	-0.3	Similar coverage
Elusimicrobiota	96.9	97.2	-0.3	Similar coverage
Ignavibacteriota	97.5	97.9	-0.4	Similar coverage
Deinococcota	97.9	98.1	-0.2	Similar coverage
Bdellovibrionota	98.1	98.4	-0.3	Similar coverage
Aquificota	96.3	96.7	-0.4	Similar coverage
Pseudomonadota	96.6	97	-0.4	Similar coverage
Nitrospirota	97.1	97.5	-0.4	Similar coverage
Cyanobacteriota	97.2	97.6	-0.4	Similar coverage
Hydrothermarchaeota	98.1	98.5	-0.4	Similar coverage
Zixibacteria	95.2	95.7	-0.5	Similar coverage
Bacillota	96.1	96.6	-0.5	Similar coverage
Actinomycetota	97	97.6	-0.6	Similar coverage
Dadabacteria	97.1	97.6	-0.5	Similar coverage
Verrucomicrobiota	96.7	97.3	-0.6	Similar coverage
Balneolota	97.8	98.4	-0.6	Similar coverage
RCP2-54	90.5	91.2	-0.7	Similar coverage
Bacteroidota	96.8	97.5	-0.7	Similar coverage
Patescibacteria	90.1	91	-0.9	Similar coverage
Gemmatimonadota	92.8	93.6	-0.8	Similar coverage
Fusobacteriota	95.1	96	-0.9	Similar coverage
Spirochaetota	96.5	97.5	-1	341f/806r better
Dependentiae	97	98.1	-1.1	341f/806r better
Sva0485	97.9	99	-1.1	341f/806r better
Acetothermia	98.4	99.5	-1.1	341f/806r better
Latescibacterota	96.5	97.8	-1.3	341f/806r better
Rhodothermota	97	98.2	-1.2	341f/806r better
Synergistota	94.5	95.8	-1.3	341f/806r better
Thermotogota	96.7	98	-1.3	341f/806r better
DTB120	97.4	98.7	-1.3	341f/806r better
MBNT15	97.5	98.8	-1.3	341f/806r better
Chlamydiota	97.8	99.4	-1.6	341f/806r better
Cloacimonadota	95.1	97	-1.9	341f/806r better
Halanaerobiaeota	95.1	97	-1.9	341f/806r better
Sumerlaeota	94.2	96.2	-2	341f/806r better
Thermoplasmatota	95.8	97.9	-2.1	341f/806r better
Fibrobacterota	93.6	96.4	-2.8	341f/806r better
Deferribacterota	94.4	97.5	-3.1	341f/806r better
Modulibacteria	90.9	94.2	-3.3	341f/806r better
Fermentibacterota	92.6	96.3	-3.7	341f/806r better
Chlorobiota	90.5	95.3	-4.8	341f/806r better
Caldisericota	93.9	98.9	-5	341f/806r better
WS4	88.2	94.1	-5.9	341f/806r better
Poribacteria	92.3	100	-7.7	341f/806r better
Micrarchaeota	85.2	93.6	-8.4	341f/806r better
Discoba	81.5	91.3	-9.8	341f/806r better
Incertae Sedis	77.5	98.7	-21.2	341f/806r better

## Sheet: Genus_Comparison
Genus	515f_806r_Coverage_%	341f_806r_Coverage_%	Coverage_Difference_%	Primer Comparison
A-3-62	100	0	-100	No coverage in 341f/806r
Allovahlkampfia	100	0	-100	No coverage in 341f/806r
Amphitrema	100	0	-100	No coverage in 341f/806r
Antarctosaccion	100	0	-100	No coverage in 341f/806r
Arcellina	100	0	-100	No coverage in 341f/806r
Archerella	100	0	-100	No coverage in 341f/806r
Aulacantha	100	0	-100	No coverage in 341f/806r
Auloceros	100	0	-100	No coverage in 341f/806r
Aurearena	100	0	-100	No coverage in 341f/806r
Candidatus Micrarchaeum	100	0	-100	No coverage in 341f/806r
Chaetopeltidales	100	0	-100	No coverage in 341f/806r
Chaetophorales	100	0	-100	No coverage in 341f/806r
Chattonellales	100	0	-100	No coverage in 341f/806r
Chlorocystidales	100	0	-100	No coverage in 341f/806r
Chorda	100	0	-100	No coverage in 341f/806r
Chrysocapsales	100	0	-100	No coverage in 341f/806r
Chrysosphaerales	100	0	-100	No coverage in 341f/806r
Chrysowaernella	100	0	-100	No coverage in 341f/806r
Coelarthrum	100	0	-100	No coverage in 341f/806r
Coelodendrum	100	0	-100	No coverage in 341f/806r
Copromyxa	100	0	-100	No coverage in 341f/806r
Deltotrichonympha	100	0	-100	No coverage in 341f/806r
Desmarestiales	100	0	-100	No coverage in 341f/806r
Dictyotales	100	0	-100	No coverage in 341f/806r
Ditrichomonas	100	0	-100	No coverage in 341f/806r
Ectocarpales	100	0	-100	No coverage in 341f/806r
Entamoeba	100	0	-100	No coverage in 341f/806r
Florenciellales	100	0	-100	No coverage in 341f/806r
Fucales	100	0	-100	No coverage in 341f/806r
Gigantomonas	100	0	-100	No coverage in 341f/806r
Giraudyopsis	100	0	-100	No coverage in 341f/806r
Heterosiphonia	100	0	-100	No coverage in 341f/806r
Hexamastix	100	0	-100	No coverage in 341f/806r
Honigbergiella	100	0	-100	No coverage in 341f/806r
Hyphochytrium	100	0	-100	No coverage in 341f/806r
Joenoides	100	0	-100	No coverage in 341f/806r
Komvophoron	100	0	-100	No coverage in 341f/806r
Koruga	100	0	-100	No coverage in 341f/806r
Labyrinthuloides	100	0	-100	No coverage in 341f/806r
Lacusteria	100	0	-100	No coverage in 341f/806r
Learamoeba	100	0	-100	No coverage in 341f/806r
Medusetta	100	0	-100	No coverage in 341f/806r
Mischococcales	100	0	-100	No coverage in 341f/806r
Mixotricha	100	0	-100	No coverage in 341f/806r
Monocercomonas	100	0	-100	No coverage in 341f/806r
Monorhizochytrium	100	0	-100	No coverage in 341f/806r
Neovahlkampfia	100	0	-100	No coverage in 341f/806r
Oblongichytrium	100	0	-100	No coverage in 341f/806r
Odonthalia	100	0	-100	No coverage in 341f/806r
Olisthodiscus	100	0	-100	No coverage in 341f/806r
Oltmansiellopsidales	100	0	-100	No coverage in 341f/806r
P34.48	100	0	-100	No coverage in 341f/806r
Palmophyllales	100	0	-100	No coverage in 341f/806r
Pentatrichomonas	100	0	-100	No coverage in 341f/806r
Pentatrichomonoides	100	0	-100	No coverage in 341f/806r
Phaeosphaerida	100	0	-100	No coverage in 341f/806r
Phaeothamniales	100	0	-100	No coverage in 341f/806r
Picophagus	100	0	-100	No coverage in 341f/806r
Pinguiochrysidales	100	0	-100	No coverage in 341f/806r
Platoma	100	0	-100	No coverage in 341f/806r
Pleurochloridales	100	0	-100	No coverage in 341f/806r
Porospathis	100	0	-100	No coverage in 341f/806r
Proteromonas	100	0	-100	No coverage in 341f/806r
Protocystis	100	0	-100	No coverage in 341f/806r
Protoopalina	100	0	-100	No coverage in 341f/806r
Pseudotrichomonas	100	0	-100	No coverage in 341f/806r
Pygsuia	100	0	-100	No coverage in 341f/806r
Reticulamoeba	100	0	-100	No coverage in 341f/806r
Rhizidiomyces	100	0	-100	No coverage in 341f/806r
Rhizochromulinales	100	0	-100	No coverage in 341f/806r
Sarcinochrysidales	100	0	-100	No coverage in 341f/806r
Sawyeria	100	0	-100	No coverage in 341f/806r
Schizocladia	100	0	-100	No coverage in 341f/806r
Scotinosphaerales	100	0	-100	No coverage in 341f/806r
Sicyoidochytrium	100	0	-100	No coverage in 341f/806r
Simplicimonas	100	0	-100	No coverage in 341f/806r
Sphacelariales	100	0	-100	No coverage in 341f/806r
Sphaerastrum	100	0	-100	No coverage in 341f/806r
Stellarchytrium	100	0	-100	No coverage in 341f/806r
Synchroma	100	0	-100	No coverage in 341f/806r
Synurales	100	0	-100	No coverage in 341f/806r
Tetrasporales	100	0	-100	No coverage in 341f/806r
Tilopteridales	100	0	-100	No coverage in 341f/806r
Titanophora	100	0	-100	No coverage in 341f/806r
Tribonematales	100	0	-100	No coverage in 341f/806r
Trichomitus	100	0	-100	No coverage in 341f/806r
Tuscaretta	100	0	-100	No coverage in 341f/806r
Ulotrichales	100	0	-100	No coverage in 341f/806r
Vahlkampfia	100	0	-100	No coverage in 341f/806r
Vaucheriales	100	0	-100	No coverage in 341f/806r
Candidatus Nanopusillus	0	100	-100	341f/806r better
Ulvales	98.6	0	-98.6	No coverage in 341f/806r
Trentepohliales	98.6	0	-98.6	No coverage in 341f/806r
Coscinodiscophytina	98.5	0	-98.5	No coverage in 341f/806r
Chlamydomonadales	98.5	0	-98.5	No coverage in 341f/806r
Candidatus Carsonella	97	0	-97	No coverage in 341f/806r
Sphaeropleales	96.9	0	-96.9	No coverage in 341f/806r
Eustigmatales	96.9	0	-96.9	No coverage in 341f/806r
Heteronematina	96.6	0	-96.6	No coverage in 341f/806r
Tetratrichomonas	96.4	0	-96.4	No coverage in 341f/806r
Bacillariophytina	96.4	0	-96.4	No coverage in 341f/806r
Chlorosarcinales	95.8	0	-95.8	No coverage in 341f/806r
Chromulinales	95.8	0	-95.8	No coverage in 341f/806r
Aphagea	95	0	-95	No coverage in 341f/806r
Ochromonadales	94.9	0	-94.9	No coverage in 341f/806r
Trichonympha	93.6	0	-93.6	No coverage in 341f/806r
AB_125	93.1	0	-93.1	No coverage in 341f/806r
Parietichytrium	92.9	0	-92.9	No coverage in 341f/806r
Trichomonas	92.9	0	-92.9	No coverage in 341f/806r
Ulkenia	92.3	0	-92.3	No coverage in 341f/806r
Cladophorales	92.3	0	-92.3	No coverage in 341f/806r
Pedinellales	92	0	-92	No coverage in 341f/806r
P34.45	91.7	0	-91.7	No coverage in 341f/806r
Dictyochales	91.4	0	-91.4	No coverage in 341f/806r
Pelagomonadales	89.6	0	-89.6	No coverage in 341f/806r
Rhynchopus	88.9	0	-88.9	No coverage in 341f/806r
Thermosphaera	88.9	0	-88.9	No coverage in 341f/806r
Thraustochytrium	88.9	0	-88.9	No coverage in 341f/806r
Globothalamea	86.8	0	-86.8	No coverage in 341f/806r
Hibberdiales	86.7	0	-86.7	No coverage in 341f/806r
Aurantiochytrium	86.1	0	-86.1	No coverage in 341f/806r
Tetramitus	85.7	0	-85.7	No coverage in 341f/806r
Tubothalamea	85.6	0	-85.6	No coverage in 341f/806r
Schizochytrium	84.6	0	-84.6	No coverage in 341f/806r
Piroplasmorida	81.8	0	-81.8	No coverage in 341f/806r
LC_3	100	18.2	-81.8	515f/806r better
Candidatus Nanobsidianus	0	81.8	-81.8	341f/806r better
Aplanochytrium	81.6	0	-81.6	No coverage in 341f/806r
Sorodiplophrys	89.8	8.3	-81.5	515f/806r better
ME-Euk-FW10	81	0	-81	No coverage in 341f/806r
SCM38C39 marine group	80.9	0	-80.9	No coverage in 341f/806r
Bryopsidales	79.4	0	-79.4	No coverage in 341f/806r
MALV-II	77.4	0	-77.4	No coverage in 341f/806r
Aphelidea	76.5	0	-76.5	No coverage in 341f/806r
Protosporangium	76.5	0	-76.5	No coverage in 341f/806r
Haplosporida	75.8	0	-75.8	No coverage in 341f/806r
Centroceras	75	0	-75	No coverage in 341f/806r
Coronympha	100	25	-75	515f/806r better
Laminariales	72.2	0	-72.2	No coverage in 341f/806r
Labyrinthula	71.4	0	-71.4	No coverage in 341f/806r
Nanoarchaeum	4.8	76.2	-71.4	341f/806r better
Naegleria	70	0	-70	No coverage in 341f/806r
Diplonema	66.7	0	-66.7	No coverage in 341f/806r
Oedogoniales	65	0	-65	No coverage in 341f/806r
Zygnematophyceae	63.2	0	-63.2	No coverage in 341f/806r
LCB-4	89.6	28.3	-61.3	515f/806r better
Vannellida	60.5	0	-60.5	No coverage in 341f/806r
Massisteria	60	0	-60	No coverage in 341f/806r
Gregarinasina	82.8	26.4	-56.4	515f/806r better
Candidatus Altiarchaeum	100	46.7	-53.3	515f/806r better
Challengeron	50	0	-50	No coverage in 341f/806r
Heterophrys	50	0	-50	No coverage in 341f/806r
Singhamoeba	50	0	-50	No coverage in 341f/806r
Eucomonympha	100	50	-50	515f/806r better
Snyderella	100	50	-50	515f/806r better
Bacterioplanoides	50	100	-50	341f/806r better
Bergeriella	50	100	-50	341f/806r better
Ewamiania TS0513	50	100	-50	341f/806r better
Garritya	50	100	-50	341f/806r better
Muricoccus	50	100	-50	341f/806r better
Trigonala	50	100	-50	341f/806r better
Choanozoa	46.8	0	-46.8	No coverage in 341f/806r
Candidatus Hodgkinia	96	52	-44	515f/806r better
Methanotorris	57.1	100	-42.9	341f/806r better
Choanocystis	40	0	-40	No coverage in 341f/806r
Erysipelotrichaceae UCG-007	55.6	94.4	-38.8	341f/806r better
Centramoebida	37.2	0	-37.2	No coverage in 341f/806r
AR15	100	63.2	-36.8	515f/806r better
Rhizomastix	36.4	0	-36.4	No coverage in 341f/806r
Izhakiella	96	60	-36	515f/806r better
Litostomatea	91.2	56	-35.1	515f/806r better
Candidatus Methanofastidiosum	93.2	59.6	-33.6	515f/806r better
Gallicola	33.3	66.7	-33.4	341f/806r better
Halosaccharopolyspora	33.3	66.7	-33.4	341f/806r better
Gymnochlora	33.3	0	-33.3	No coverage in 341f/806r
Saccamoeba	33.3	0	-33.3	No coverage in 341f/806r
Ferroglobus	100	66.7	-33.3	515f/806r better
Ursidibacter	100	66.7	-33.3	515f/806r better
Bombiscardovia	66.7	100	-33.3	341f/806r better
C-2	66.7	100	-33.3	341f/806r better
Halonatronum	66.7	100	-33.3	341f/806r better
Peridiniphycidae	28.1	0	-28.1	No coverage in 341f/806r
Cryptosporida	25.6	0	-25.6	No coverage in 341f/806r
Nephroselmidales	25	0	-25	No coverage in 341f/806r
Foaina	50	25	-25	515f/806r better
Atlantibacter	75	50	-25	515f/806r better
Ancylothrix 8PC	100	75	-25	515f/806r better
Butyricicoccus	100	75	-25	515f/806r better
DMI	100	75	-25	515f/806r better
Lysinimonas	100	75	-25	515f/806r better
Sinobaca	100	75	-25	515f/806r better
Sulfurisphaera	100	75	-25	515f/806r better
Swaminathania	100	75	-25	515f/806r better
Thermoplasma	100	75	-25	515f/806r better
Modicisalibacter	50	75	-25	341f/806r better
Actinorectispora	75	100	-25	341f/806r better
AUTHM297	75	100	-25	341f/806r better
Fastidiosibacter	75	100	-25	341f/806r better
Flindersiella	75	100	-25	341f/806r better
Insolitispirillum	75	100	-25	341f/806r better
Keratinibaculum	75	100	-25	341f/806r better
Macromonas	75	100	-25	341f/806r better
Sinobacterium	75	100	-25	341f/806r better
Tepidicaulis	75	100	-25	341f/806r better
A31	24.4	0	-24.4	No coverage in 341f/806r
Trebouxiales	23.8	0	-23.8	No coverage in 341f/806r
Euglenophyceae	23.3	0	-23.3	No coverage in 341f/806r
[Polyangium] brachysporum group	100	77.8	-22.2	515f/806r better
Cutibacterium	68	88.4	-20.4	341f/806r better
Acidilobus	90	70	-20	515f/806r better
Actibacter	100	80	-20	515f/806r better
Hansschlegelia	100	80	-20	515f/806r better
Lipingzhangella	100	80	-20	515f/806r better
AOM-SR-A49	80	100	-20	341f/806r better
Aquibacillus	80	100	-20	341f/806r better
Coenonia	80	100	-20	341f/806r better
Cupidesulfovibrio	80	100	-20	341f/806r better
Flexistipes	80	100	-20	341f/806r better
Hugenholtzia	80	100	-20	341f/806r better
Natrarchaeobaculum	80	100	-20	341f/806r better
Syntrophobacterium	80	100	-20	341f/806r better
Fungi	76.9	58.3	-18.6	515f/806r better
Prochlorococcus MIT9313	81.6	100	-18.4	341f/806r better
Fannyhessea	81.8	100	-18.2	341f/806r better
Mangroviflexus	81.8	100	-18.2	341f/806r better
Amastigomonas	17.6	0	-17.6	No coverage in 341f/806r
Candidatus Arthromitus	82.4	100	-17.6	341f/806r better
Ignisphaera	100	82.8	-17.2	515f/806r better
09D2Z48	75.6	92.7	-17.1	341f/806r better
Bact-08	83.3	100	-16.7	341f/806r better
CI75cm.2.12	83.3	100	-16.7	341f/806r better
Elstera	83.3	100	-16.7	341f/806r better
Muricomes	83.3	100	-16.7	341f/806r better
Propionimicrobium	83.3	100	-16.7	341f/806r better
Rivicola	83.3	100	-16.7	341f/806r better
Spirabiliibacterium	83.3	100	-16.7	341f/806r better
Perkinsus	16.7	0	-16.7	No coverage in 341f/806r
Tritrichomonas	16.7	0	-16.7	No coverage in 341f/806r
Xanthomarina	66.7	50	-16.7	515f/806r better
Aidingimonas	100	83.3	-16.7	515f/806r better
EcFYyy-200	100	83.3	-16.7	515f/806r better
Elioraea	100	83.3	-16.7	515f/806r better
Oscillatoria SAG 1459-8	100	83.3	-16.7	515f/806r better
SN8	100	83.3	-16.7	515f/806r better
Sulfuracidifex	100	83.3	-16.7	515f/806r better
Thermodiscus	100	83.3	-16.7	515f/806r better
Rubripirellula	77.8	94.4	-16.6	341f/806r better
Microthamniales	16.6	0	-16.6	No coverage in 341f/806r
Candidatus Tremblaya	100	83.8	-16.2	515f/806r better
Methanomicrobium	94.9	78.9	-16	515f/806r better
Ephemeroptericola	84.6	100	-15.4	341f/806r better
Rivibacter	100	84.6	-15.4	515f/806r better
Coccidia	15.3	0	-15.3	No coverage in 341f/806r
Duffyella	81.5	96.3	-14.8	341f/806r better
Pseudofulvimonas	81.5	96.3	-14.8	341f/806r better
Tangfeifania	85.2	100	-14.8	341f/806r better
Azonexus	78.6	92.9	-14.3	341f/806r better
Spumellaria	14.3	0	-14.3	No coverage in 341f/806r
Muriiphilus	100	85.7	-14.3	515f/806r better
Propionispora	100	85.7	-14.3	515f/806r better
Thermoflexibacter	100	85.7	-14.3	515f/806r better
Thiofractor	100	85.7	-14.3	515f/806r better
Aminiphilus	71.4	85.7	-14.3	341f/806r better
Dehalobium	71.4	85.7	-14.3	341f/806r better
Geovibrio	71.4	85.7	-14.3	341f/806r better
Eisenibacter	85.7	100	-14.3	341f/806r better
Eremococcus	85.7	100	-14.3	341f/806r better
Heliimonas	85.7	100	-14.3	341f/806r better
Histidinibacterium	85.7	100	-14.3	341f/806r better
Melittangium	85.7	100	-14.3	341f/806r better
Murdochiella	85.7	100	-14.3	341f/806r better
Coleochaetophyceae	13.9	0	-13.9	No coverage in 341f/806r
Salinivirga	86.5	100	-13.5	341f/806r better
Oligella	86.7	100	-13.3	341f/806r better
Candidatus Contendobacter	100	87	-13	515f/806r better
Lawsonella	79.6	92.3	-12.7	341f/806r better
NAMAKO-2	12.5	0	-12.5	No coverage in 341f/806r
Caldilinea	87.5	75	-12.5	515f/806r better
Methanimicrococcus	100	87.5	-12.5	515f/806r better
Mobilicoccus	100	87.5	-12.5	515f/806r better
Renibacterium	100	87.5	-12.5	515f/806r better
Cerasibacillus	75	87.5	-12.5	341f/806r better
Marichromatium	81.3	93.8	-12.5	341f/806r better
Caldanaerobius	87.5	100	-12.5	341f/806r better
Candidatus Hepatincola	87.5	100	-12.5	341f/806r better
Carboxydocella	87.5	100	-12.5	341f/806r better
Marinilabilia	87.5	100	-12.5	341f/806r better
Periweissella	87.5	100	-12.5	341f/806r better
Persicobacter	87.5	100	-12.5	341f/806r better
Rhodovibrio	87.5	100	-12.5	341f/806r better
Ruania	87.5	100	-12.5	341f/806r better
Euduboscquellidae	12.4	0	-12.4	No coverage in 341f/806r
Morganella	95.1	82.9	-12.2	515f/806r better
Lentibacter	100	88	-12	515f/806r better
Azotobacter	85.3	97.3	-12	341f/806r better
Candidatus Nitrosocosmicus	91.8	80	-11.8	515f/806r better
Schnuerera	100	88.2	-11.8	515f/806r better
Aerococcus	86.7	98.2	-11.5	341f/806r better
[Clostridium] innocuum group	81	92.4	-11.4	341f/806r better
Methanococcoides	95.6	84.4	-11.2	515f/806r better
Xenophilus	77.8	88.9	-11.1	341f/806r better
Ezakiella	83.3	94.4	-11.1	341f/806r better
Candidatus Desulfofervidus	88.9	77.8	-11.1	515f/806r better
[Eubacterium] saphenum group	100	88.9	-11.1	515f/806r better
ANME-2b	100	88.9	-11.1	515f/806r better
Desulfogranum	100	88.9	-11.1	515f/806r better
Pseudorhodobacter	100	88.9	-11.1	515f/806r better
Kerstersia	85.2	96.3	-11.1	341f/806r better
Candidatus Glomeribacter	88.9	100	-11.1	341f/806r better
Cyanobacterium PCC-7202	88.9	100	-11.1	341f/806r better
Geomicrobium	88.9	100	-11.1	341f/806r better
Heliomicrobium	88.9	100	-11.1	341f/806r better
Neomegalonema	88.9	100	-11.1	341f/806r better
Pelagibaca	88.9	100	-11.1	341f/806r better
Rhodothermus	88.9	100	-11.1	341f/806r better
Roseimaritima	88.9	100	-11.1	341f/806r better
Saonia	88.9	100	-11.1	341f/806r better
Thiolinea	88.9	100	-11.1	341f/806r better
Collodaria	10.9	0	-10.9	No coverage in 341f/806r
Pyrodictium	90	80	-10	515f/806r better
Tepidanaerobacter	95	85	-10	515f/806r better
V38	100	90	-10	515f/806r better
Hornefia	80	90	-10	341f/806r better
Verminephrobacter	80	90	-10	341f/806r better
Aquimonas	85	95	-10	341f/806r better
Algitalea	90	100	-10	341f/806r better
Anaerosporobacter	90	100	-10	341f/806r better
Annamia HOs24	90	100	-10	341f/806r better
Ectothiorhodospira	90	100	-10	341f/806r better
Enhygromyxa	90	100	-10	341f/806r better
Halovibrio	90	100	-10	341f/806r better
Minicystis	90	100	-10	341f/806r better
Thermopetrobacter	90	100	-10	341f/806r better
Methanosphaera	90.4	80.5	-9.9	515f/806r better
Dolosigranulum	87.2	96.8	-9.6	341f/806r better
Ebriacea	9.5	0	-9.5	No coverage in 341f/806r
Aestuariicoccus	100	90.5	-9.5	515f/806r better
Fundidesulfovibrio	100	90.5	-9.5	515f/806r better
Nioella	100	90.5	-9.5	515f/806r better
Dermabacter	85.7	95.2	-9.5	341f/806r better
Thermobrachium	81.4	90.7	-9.3	341f/806r better
Gracilaria	9.1	0	-9.1	No coverage in 341f/806r
Kraken	9.1	0	-9.1	No coverage in 341f/806r
Ignicoccus	90.9	81.8	-9.1	515f/806r better
Desulfuribacillus	100	90.9	-9.1	515f/806r better
Pelistega	100	90.9	-9.1	515f/806r better
Yokenella	100	90.9	-9.1	515f/806r better
Anoxybacter	90.9	100	-9.1	341f/806r better
Kozakia	90.9	100	-9.1	341f/806r better
Negativicoccus	90.9	100	-9.1	341f/806r better
Oceanicella	90.9	100	-9.1	341f/806r better
Salinispira	90.9	100	-9.1	341f/806r better
SBXY-748	90.9	100	-9.1	341f/806r better
Thermomarinilinea	90.9	100	-9.1	341f/806r better
Staphylococcus	84.7	93.7	-9	341f/806r better
Eubacterium	89.3	98.2	-8.9	341f/806r better
Pseudohaliea	91.1	100	-8.9	341f/806r better
Methanocalculus	100	91.2	-8.8	515f/806r better
Finegoldia	90.1	98.8	-8.7	341f/806r better
Parvilucifera	8.7	0	-8.7	No coverage in 341f/806r
Thermofilum	95.7	87	-8.7	515f/806r better
Pyrococcus	100	91.3	-8.7	515f/806r better
Dinophysiales	8.6	0	-8.6	No coverage in 341f/806r
Thiovirga	80.9	89.4	-8.5	341f/806r better
Gimesia	83.3	91.7	-8.4	341f/806r better
Trichloromonas	91.7	83.3	-8.4	515f/806r better
Lentilactobacillus	94.2	85.8	-8.4	515f/806r better
Candidatus Korarchaeum	96.7	88.3	-8.4	515f/806r better
AR20	75	66.7	-8.3	515f/806r better
Dickeya	95	86.7	-8.3	515f/806r better
Anaerophaga	95.8	87.5	-8.3	515f/806r better
Catalinimonas	100	91.7	-8.3	515f/806r better
Furfurilactobacillus	100	91.7	-8.3	515f/806r better
Hoppeia	100	91.7	-8.3	515f/806r better
Ornithinibacillus	100	91.7	-8.3	515f/806r better
Spirulina CCC Snake P-Y-85	100	91.7	-8.3	515f/806r better
Zhihengliuella	100	91.7	-8.3	515f/806r better
Teranympha	66.7	75	-8.3	341f/806r better
Leeuwenhoekiella	87.5	95.8	-8.3	341f/806r better
Hungatella	87.9	96.2	-8.3	341f/806r better
Belnapia	91.7	100	-8.3	341f/806r better
Ellin516	91.7	100	-8.3	341f/806r better
Franconibacter	91.7	100	-8.3	341f/806r better
Iodobacter	91.7	100	-8.3	341f/806r better
Kytococcus	91.7	100	-8.3	341f/806r better
Micropruina	91.7	100	-8.3	341f/806r better
Microscilla	91.7	100	-8.3	341f/806r better
Nitrincola	91.7	100	-8.3	341f/806r better
Parazoarcus	91.7	100	-8.3	341f/806r better
SD04E11	91.7	100	-8.3	341f/806r better
Simonsiella	91.7	100	-8.3	341f/806r better
Succinimonas	91.7	100	-8.3	341f/806r better
Desulfoplanes	92	100	-8	341f/806r better
Cercomonas	7.9	0	-7.9	No coverage in 341f/806r
BBMC-4	92.1	84.2	-7.9	515f/806r better
ESFC-1	69.2	76.9	-7.7	341f/806r better
Candidatus Nostocoida	84.6	92.3	-7.7	341f/806r better
Alloiococcus	88.5	96.2	-7.7	341f/806r better
Alteribacter	92.3	100	-7.7	341f/806r better
Canibacter	92.3	100	-7.7	341f/806r better
Centipeda	92.3	100	-7.7	341f/806r better
Flexithrix	92.3	100	-7.7	341f/806r better
Methylomicrobium	92.3	100	-7.7	341f/806r better
SZB85	92.3	100	-7.7	341f/806r better
Thermanaeromonas	92.3	100	-7.7	341f/806r better
Hypotrichomonas	7.7	0	-7.7	No coverage in 341f/806r
Tunicatimonas	84.6	76.9	-7.7	515f/806r better
Syntrophospora	92.3	84.6	-7.7	515f/806r better
Thalassobaculum	92.3	84.6	-7.7	515f/806r better
Caldisphaera	100	92.3	-7.7	515f/806r better
Candidatus Vidania	100	92.3	-7.7	515f/806r better
Citreicella	100	92.3	-7.7	515f/806r better
Helcobacillus	100	92.3	-7.7	515f/806r better
Phytohabitans	100	92.3	-7.7	515f/806r better
Pseudalkalibacillus	100	92.3	-7.7	515f/806r better
Rodentibacter	91.5	99.1	-7.6	341f/806r better
Fenollaria	92.6	100	-7.4	341f/806r better
Muribacter	92.6	100	-7.4	341f/806r better
Empedobacter	85.2	92.6	-7.4	341f/806r better
Marivirga	88.9	96.3	-7.4	341f/806r better
Pseudothermotoga	88.9	96.3	-7.4	341f/806r better
Rathayibacter	88.9	96.3	-7.4	341f/806r better
Silicimonas	88.9	96.3	-7.4	341f/806r better
Aquabacterium	86.5	93.8	-7.3	341f/806r better
NLAE-z1	85.7	92.9	-7.2	341f/806r better
Polysiphonia	7.1	0	-7.1	No coverage in 341f/806r
FS142-36B-02	100	92.9	-7.1	515f/806r better
Janthinobacterium	85.2	92.3	-7.1	341f/806r better
Granulicatella	86.7	93.8	-7.1	341f/806r better
A-plasma	92.9	100	-7.1	341f/806r better
Desulfatibacillum	92.9	100	-7.1	341f/806r better
Gleimia	92.9	100	-7.1	341f/806r better
Planifilum	92.9	100	-7.1	341f/806r better
Polygonibacillus	92.9	100	-7.1	341f/806r better
Starkeya	92.9	100	-7.1	341f/806r better
Dactylopodida	7	0	-7	No coverage in 341f/806r
MAT-CR-H6-H10	90.3	83.3	-7	515f/806r better
Abiotrophia	93	100	-7	341f/806r better
Corynebacterium	90	96.9	-6.9	341f/806r better
Agitococcus	93.1	100	-6.9	341f/806r better
Candidatus Methanoplasma	93.1	100	-6.9	341f/806r better
Salinicola	88.4	95.3	-6.9	341f/806r better
Microcystis PCC-7914	90.4	97.3	-6.9	341f/806r better
Gymnodiniphycidae	6.8	0	-6.8	No coverage in 341f/806r
Geothermobacter	97.7	90.9	-6.8	515f/806r better
Amnibacterium	93.3	100	-6.7	341f/806r better
Brassicibacter	93.3	100	-6.7	341f/806r better
Brochothrix	93.3	100	-6.7	341f/806r better
Cedecea	93.3	100	-6.7	341f/806r better
FukuN57	93.3	100	-6.7	341f/806r better
GBChlB	93.3	100	-6.7	341f/806r better
Candidatus Uzinura	98.6	91.9	-6.7	515f/806r better
Methylovirgula	100	93.3	-6.7	515f/806r better
Secundilactobacillus	100	93.3	-6.7	515f/806r better
Candidatus Nitrosotalea	94.1	87.5	-6.6	515f/806r better
Exilispira	86.7	93.3	-6.6	341f/806r better
OLB13	86.7	93.3	-6.6	341f/806r better
Thomasclavelia	92.5	99.1	-6.6	341f/806r better
Lelliottia	96.8	90.3	-6.5	515f/806r better
Aciduliprofundum	100	93.5	-6.5	515f/806r better
Macellibacteroides	88.7	95.2	-6.5	341f/806r better
Mariniblastus	90.5	97	-6.5	341f/806r better
Caproiciproducens	93.6	87.2	-6.4	515f/806r better
Desulfonema	87.2	93.6	-6.4	341f/806r better
Tepidibacter	93.8	87.5	-6.3	515f/806r better
Afifella	81.3	87.5	-6.2	341f/806r better
Haematobacter	81.3	87.5	-6.2	341f/806r better
Candidatus Brocadia	90.6	96.8	-6.2	341f/806r better
Allohahella	93.8	100	-6.2	341f/806r better
Candidatus Puniceispirillum	93.8	100	-6.2	341f/806r better
Malikia	93.8	100	-6.2	341f/806r better
Phormidium SAG 37.90	93.8	100	-6.2	341f/806r better
Ferrithrix	100	93.8	-6.2	515f/806r better
Haloactinopolyspora	100	93.8	-6.2	515f/806r better
Raoultibacter	100	93.8	-6.2	515f/806r better
Salinarchaeum	100	93.8	-6.2	515f/806r better
Soehngenia	90.9	84.8	-6.1	515f/806r better
Gilliamella	89.4	95.5	-6.1	341f/806r better
Methanolobus	93.9	87.9	-6	515f/806r better
JGI-0000079-D21	94	100	-6	341f/806r better
Haliscomenobacter	85.3	91.2	-5.9	341f/806r better
Flexibacter	94.1	100	-5.9	341f/806r better
Giesbergeria	94.1	100	-5.9	341f/806r better
Laceyella	94.1	100	-5.9	341f/806r better
Parasegetibacter	94.1	100	-5.9	341f/806r better
Pseudaeromonas	94.1	100	-5.9	341f/806r better
Schinkia	94.1	100	-5.9	341f/806r better
Thiocystis	94.1	100	-5.9	341f/806r better
UBA12411	94.1	100	-5.9	341f/806r better
Candidatus Haloredivivus	100	94.1	-5.9	515f/806r better
Mameliella	100	94.1	-5.9	515f/806r better
Gilvimarinus	88.2	94.1	-5.9	341f/806r better
Lancefieldella	88.2	94.1	-5.9	341f/806r better
Niveispirillum	88.2	94.1	-5.9	341f/806r better
Coraliomargarita	91.2	97.1	-5.9	341f/806r better
Solitalea	91.2	97.1	-5.9	341f/806r better
Candidatus Nitrosopumilus	93.3	87.5	-5.8	515f/806r better
Blastochloris	82.4	88.2	-5.8	341f/806r better
Nitratireductor	87.5	93.3	-5.8	341f/806r better
Bergeyella	91.3	97.1	-5.8	341f/806r better
Aggregatibacter	93.2	99	-5.8	341f/806r better
Haloquadratum	100	94.3	-5.7	515f/806r better
Pseudopedobacter	83.3	88.9	-5.6	341f/806r better
Candidatus Actinomarina	97.2	91.6	-5.6	515f/806r better
Nitratiruptor	100	94.4	-5.6	515f/806r better
Oceanobacter	100	94.4	-5.6	515f/806r better
Candidatus Iainarchaeum	86.7	92.3	-5.6	341f/806r better
W5	88.7	94.3	-5.6	341f/806r better
Atopobium	94.4	100	-5.6	341f/806r better
Azovibrio	94.4	100	-5.6	341f/806r better
Desulfurobacterium	94.4	100	-5.6	341f/806r better
Dinoroseobacter	94.4	100	-5.6	341f/806r better
Mesoflavibacter	94.4	100	-5.6	341f/806r better
Tamlana	94.4	100	-5.6	341f/806r better
Candidatus Hamiltonella	94.4	88.9	-5.5	515f/806r better
Candidatus Nitrosocaldus	94.4	88.9	-5.5	515f/806r better
Stygiolobus	94.4	88.9	-5.5	515f/806r better
Caloramator	94.6	89.1	-5.5	515f/806r better
Thermicanus	66.7	72.2	-5.5	341f/806r better
Proteocatella	88.9	94.4	-5.5	341f/806r better
SEEP-SRB2	88.9	94.4	-5.5	341f/806r better
Streptobacillus	88.9	94.4	-5.5	341f/806r better
Alteromonas	85.6	91	-5.4	341f/806r better
Anaerotignum	94.6	100	-5.4	341f/806r better
Varibaculum	94.6	100	-5.4	341f/806r better
Methanosarcina	95	89.6	-5.4	515f/806r better
Alishewanella	89.2	94.6	-5.4	341f/806r better
Ideonella	91.1	96.4	-5.3	341f/806r better
Arthrospira PCC-7345	92.1	97.4	-5.3	341f/806r better
Dehalococcoides	92.1	97.4	-5.3	341f/806r better
Anaerosalibacter	84.2	78.9	-5.3	515f/806r better
Methanobacterium	98.1	92.8	-5.3	515f/806r better
Chroococcidiopsis PCC 7203	100	94.7	-5.3	515f/806r better
Flectobacillus	100	94.7	-5.3	515f/806r better
Halosimplex	100	94.7	-5.3	515f/806r better
Methylosinus	100	94.7	-5.3	515f/806r better
Sulfuricella	100	94.7	-5.3	515f/806r better
Symbiobacterium	100	94.7	-5.3	515f/806r better
Anaerobiospirillum	94.7	100	-5.3	341f/806r better
Frondihabitans	94.7	100	-5.3	341f/806r better
Hydrocarboniphaga	94.7	100	-5.3	341f/806r better
MM2	94.7	100	-5.3	341f/806r better
Scytonema PCC-7110	94.7	100	-5.3	341f/806r better
Peptostreptococcus	86.2	91.4	-5.2	341f/806r better
Anaerocella	89.5	94.7	-5.2	341f/806r better
Marivita	94.9	89.7	-5.2	515f/806r better
Caminicella	84.6	89.7	-5.1	341f/806r better
Puia	91.1	96.2	-5.1	341f/806r better
Roseimicrobium	97.4	92.3	-5.1	515f/806r better
Tannerella	94.9	100	-5.1	341f/806r better
Guyparkeria	95	90	-5	515f/806r better
MD3-55	100	95	-5	515f/806r better
Olleya	100	95	-5	515f/806r better
Sulfolobus	100	95	-5	515f/806r better
Methylocaldum	90	95	-5	341f/806r better
Oikopleura	90	95	-5	341f/806r better
Sphaerotilus	93.4	98.4	-5	341f/806r better
Desulfotalea	95	100	-5	341f/806r better
Erysipelotrichaceae UCG-002	95	100	-5	341f/806r better
Hydrogenimonas	95	100	-5	341f/806r better
Longibaculum	95	100	-5	341f/806r better
Marinicaulis	95	100	-5	341f/806r better
Methanomassiliicoccus	95	100	-5	341f/806r better
Parvularcula	95	100	-5	341f/806r better
Psychrilyobacter	95	100	-5	341f/806r better
Silanimonas	95	100	-5	341f/806r better
Thalassobacillus	95	100	-5	341f/806r better
Desulfomonile	91.8	96.7	-4.9	341f/806r better
Lacinutrix	100	95.2	-4.8	515f/806r better
Oscillatoria PCC-10802	100	95.2	-4.8	515f/806r better
Tritonibacter	100	95.2	-4.8	515f/806r better
Nitratifractor	92.8	97.6	-4.8	341f/806r better
Maribacter	94.4	99.2	-4.8	341f/806r better
Sanguibacter	95.2	100	-4.8	341f/806r better
TM7x	95.2	100	-4.8	341f/806r better
Pigmentiphaga	81	85.7	-4.7	341f/806r better
Membranihabitans	90.5	95.2	-4.7	341f/806r better
Fusobacterium	92	96.7	-4.7	341f/806r better
Catenibacterium	95.4	90.8	-4.6	515f/806r better
Desulfovermiculus	87	91.6	-4.6	341f/806r better
Sulfurifustis	90.7	95.3	-4.6	341f/806r better
Geitlerinema PCC-7105	90.9	95.5	-4.6	341f/806r better
Ewingella	100	95.5	-4.5	515f/806r better
Methanofollis	100	95.5	-4.5	515f/806r better
Aggregatilinea	92.4	96.9	-4.5	341f/806r better
ADurb.Bin120	93.3	97.8	-4.5	341f/806r better
Amphibacillus	95.5	100	-4.5	341f/806r better
Cloacibacillus	95.5	100	-4.5	341f/806r better
Desulfatitalea	95.5	100	-4.5	341f/806r better
FD2005	95.5	100	-4.5	341f/806r better
Vulcaniibacterium	95.5	100	-4.5	341f/806r better
Falsochrobactrum	82.6	87	-4.4	341f/806r better
Tepidiphilus	82.6	87	-4.4	341f/806r better
Asanoa	91.3	95.7	-4.4	341f/806r better
Izimaplasma	91.3	95.7	-4.4	341f/806r better
Oceanidesulfovibrio	91.3	95.7	-4.4	341f/806r better
Oceanimonas	91.3	95.7	-4.4	341f/806r better
Prosthecochloris	91.3	95.7	-4.4	341f/806r better
Rothia	93	97.4	-4.4	341f/806r better
Sorangium	94.1	98.5	-4.4	341f/806r better
Streptococcus	91.2	95.6	-4.4	341f/806r better
Ruminobacter	85.1	89.4	-4.3	341f/806r better
Beijerinckia	91.3	87	-4.3	515f/806r better
Methanothermobacter	100	95.7	-4.3	515f/806r better
SCGC AAA164-E04	100	95.7	-4.3	515f/806r better
Shimia	100	95.7	-4.3	515f/806r better
Candidatus Desulforudis	87	91.3	-4.3	341f/806r better
Tistrella	87	91.3	-4.3	341f/806r better
Aquimarina	95.7	100	-4.3	341f/806r better
Halodurantibacterium	95.7	100	-4.3	341f/806r better
Oryzomicrobium	95.7	100	-4.3	341f/806r better
Pasteuria	95.7	100	-4.3	341f/806r better
Ponticoccus	95.7	100	-4.3	341f/806r better
Thermoclostridium	95.7	100	-4.3	341f/806r better
Methylorosula	87.5	91.7	-4.2	341f/806r better
Cobetia	89	93.2	-4.2	341f/806r better
Gemella	91.3	95.5	-4.2	341f/806r better
Haemophilus	92.3	96.5	-4.2	341f/806r better
Kibdelosporangium	95.8	100	-4.2	341f/806r better
Roseiarcus	95.8	100	-4.2	341f/806r better
Vicinamibacter	91.7	87.5	-4.2	515f/806r better
Marinococcus	89.4	93.6	-4.2	341f/806r better
Marinifilum	93.1	97.2	-4.1	341f/806r better
Lederbergia	93.8	97.9	-4.1	341f/806r better
Halalkalibacterium	93.9	89.8	-4.1	515f/806r better
Companilactobacillus	98.6	94.5	-4.1	515f/806r better
Eisenbergiella	93.2	97.3	-4.1	341f/806r better
Psychromonas	93.2	97.3	-4.1	341f/806r better
Phreatobacter	95.9	100	-4.1	341f/806r better
Dialister	89.3	85.3	-4	515f/806r better
Brenneria	100	96	-4	515f/806r better
Trichococcus	100	96	-4	515f/806r better
Blvii28 wastewater-sludge group	89.3	93.3	-4	341f/806r better
Brevibacterium	92.9	96.9	-4	341f/806r better
Prevotella	93.4	97.4	-4	341f/806r better
Avibacterium	96	100	-4	341f/806r better
Flavihumibacter	96	100	-4	341f/806r better
Leisingera	96	100	-4	341f/806r better
S5-A14a	96	100	-4	341f/806r better
Terrimicrobium	96	100	-4	341f/806r better
Subgroup 23	93	96.9	-3.9	341f/806r better
Catonella	96.1	100	-3.9	341f/806r better
Heterotrichea	3.9	0	-3.9	No coverage in 341f/806r
Sodalis	98.7	94.9	-3.8	515f/806r better
Labrys	100	96.2	-3.8	515f/806r better
Moraxella	90.9	94.7	-3.8	341f/806r better
Dielma	96.2	100	-3.8	341f/806r better
Salimicrobium	96.2	100	-3.8	341f/806r better
Desulfofarcimen	92.2	95.9	-3.7	341f/806r better
Candidatus Aquirestis	92.6	96.3	-3.7	341f/806r better
Aromatoleum	92.7	96.4	-3.7	341f/806r better
Nostoc PCC-7524	92.7	96.4	-3.7	341f/806r better
Wolbachia	92.7	96.4	-3.7	341f/806r better
Porphyromonas	94.6	98.3	-3.7	341f/806r better
Aureispira	96.3	100	-3.7	341f/806r better
Cenarchaeum	96.3	100	-3.7	341f/806r better
Cytobacillus	96.3	100	-3.7	341f/806r better
Frigoribacterium	96.3	100	-3.7	341f/806r better
Rubrivivax	96.3	100	-3.7	341f/806r better
Thermoanaerobaculum	96.3	100	-3.7	341f/806r better
Sporanaerobacter	88.9	85.2	-3.7	515f/806r better
Desemzia	96.3	92.6	-3.7	515f/806r better
Halobacterium	97.6	93.9	-3.7	515f/806r better
Aeropyrum	100	96.3	-3.7	515f/806r better
NS2b marine group	100	96.3	-3.7	515f/806r better
Pararhizobium	100	96.3	-3.7	515f/806r better
Terriglobus	100	96.3	-3.7	515f/806r better
NS5 marine group	98.8	95.2	-3.6	515f/806r better
Bacteriovorax	100	96.4	-3.6	515f/806r better
Methanococcus	100	96.4	-3.6	515f/806r better
Beggiatoa	96.4	100	-3.6	341f/806r better
Thermotoga	96.4	100	-3.6	341f/806r better
Verrucosispora	96.4	100	-3.6	341f/806r better
SCADC1-2-3	96.6	93.1	-3.5	515f/806r better
Cereibacter	97.6	94.1	-3.5	515f/806r better
Demequina	100	96.5	-3.5	515f/806r better
Synechococcus CC9902	92.3	95.8	-3.5	341f/806r better
Haloplasma	92.9	96.4	-3.5	341f/806r better
Leptolyngbya VRUC 135	92.9	96.4	-3.5	341f/806r better
Desulforhopalus	94.7	98.2	-3.5	341f/806r better
KCM-B-112	94.7	98.2	-3.5	341f/806r better
Capnocytophaga	96.1	99.6	-3.5	341f/806r better
Micrococcus	87.5	90.9	-3.4	341f/806r better
Roseibium	94.3	97.7	-3.4	341f/806r better
AAP99	96.6	100	-3.4	341f/806r better
Alloprevotella	96.6	100	-3.4	341f/806r better
Pleurocapsa PCC-7319	96.6	100	-3.4	341f/806r better
Pseudobdellovibrio	96.6	100	-3.4	341f/806r better
Spirotrichea	3.4	0	-3.4	No coverage in 341f/806r
DEV114	93.1	89.7	-3.4	515f/806r better
Hydrogenispora	95.9	92.5	-3.4	515f/806r better
Roseiflexus	96.7	93.3	-3.4	515f/806r better
Methanolinea	99	95.6	-3.4	515f/806r better
Tepidimonas	100	96.6	-3.4	515f/806r better
Myroides	94.4	97.8	-3.4	341f/806r better
Caldicellulosiruptor	88.9	85.6	-3.3	515f/806r better
Pelosinus	94.6	91.3	-3.3	515f/806r better
Bosea	96	92.7	-3.3	515f/806r better
Actinopolyspora	96.8	93.5	-3.3	515f/806r better
Rummeliibacillus	96.8	93.5	-3.3	515f/806r better
Alicycliphilus	100	96.7	-3.3	515f/806r better
Propionicicella	80	83.3	-3.3	341f/806r better
Candidatus Amoebophilus	86.7	90	-3.3	341f/806r better
Qipengyuania	91.7	95	-3.3	341f/806r better
Sellimonas	96.7	100	-3.3	341f/806r better
Cephaloticoccus	90.6	93.8	-3.2	341f/806r better
Actinomyces	95.2	98.4	-3.2	341f/806r better
Brachyspira	95.2	98.4	-3.2	341f/806r better
Elizabethkingia	95.2	98.4	-3.2	341f/806r better
Luteibacter	95.2	98.4	-3.2	341f/806r better
Guggenheimella	96.8	100	-3.2	341f/806r better
Nostoc PCC-8976	96.8	100	-3.2	341f/806r better
Thermosinus	96.8	100	-3.2	341f/806r better
V9D2013 group	96.8	100	-3.2	341f/806r better
Pannonibacter	93.5	90.3	-3.2	515f/806r better
Methanobrevibacter	98.5	95.3	-3.2	515f/806r better
Jeotgalibacillus	100	96.8	-3.2	515f/806r better
Ferrovum	77.4	80.6	-3.2	341f/806r better
Acidaminococcus	83.9	87.1	-3.2	341f/806r better
Neptuniibacter	81.3	84.4	-3.1	341f/806r better
Succinivibrionaceae UCG-001	81.3	84.4	-3.1	341f/806r better
UCG-009	93.8	96.9	-3.1	341f/806r better
Lautropia	94.3	97.4	-3.1	341f/806r better
Thalassospira	94.8	97.9	-3.1	341f/806r better
Aureimonas	95.3	98.4	-3.1	341f/806r better
Zymomonas	97	93.9	-3.1	515f/806r better
Sh765B-TzT-35	100	96.9	-3.1	515f/806r better
Termite planctomycete cluster	93.7	96.8	-3.1	341f/806r better
Candidatus Methylopumilus	93.9	97	-3.1	341f/806r better
Corallococcus	93.9	97	-3.1	341f/806r better
Frisingicoccus	93.9	97	-3.1	341f/806r better
Parageobacillus	94.9	98	-3.1	341f/806r better
Roseomonas	95.9	99	-3.1	341f/806r better
Cnuella	96.9	100	-3.1	341f/806r better
Crenothrix	96.9	100	-3.1	341f/806r better
Martelella	96.9	100	-3.1	341f/806r better
RB41	96.9	100	-3.1	341f/806r better
Taibaiella	91.2	88.2	-3	515f/806r better
Succiniclasticum	91.5	88.5	-3	515f/806r better
Cryptanaerobacter	97.1	94.1	-3	515f/806r better
Ekhidna	97.1	94.1	-3	515f/806r better
Piscirickettsia	97.1	94.1	-3	515f/806r better
Thiogranum	87.9	90.9	-3	341f/806r better
Alcaligenes	88.9	91.9	-3	341f/806r better
Denitratisoma	90.8	93.8	-3	341f/806r better
Lentisphaera	90.9	93.9	-3	341f/806r better
SH-PL14	92.9	95.9	-3	341f/806r better
Alkalihalophilus	94.1	97.1	-3	341f/806r better
Duganella	95	98	-3	341f/806r better
[Eubacterium] yurii group	97	100	-3	341f/806r better
Candidatus Tenderia	97	100	-3	341f/806r better
Desulfatirhabdium	85.3	88.2	-2.9	341f/806r better
Parasutterella	89.6	92.5	-2.9	341f/806r better
Candidatus Marispirochaeta	97.1	100	-2.9	341f/806r better
Citricoccus	97.1	100	-2.9	341f/806r better
Cyclobacterium	97.1	100	-2.9	341f/806r better
Ellin517	97.1	100	-2.9	341f/806r better
Pedococcus-Phycicoccus	97.1	100	-2.9	341f/806r better
Pseudophaeobacter	97.1	100	-2.9	341f/806r better
Agarivorans	94.1	91.2	-2.9	515f/806r better
Phascolarctobacterium	96.1	93.2	-2.9	515f/806r better
Sedimenticola	98.6	95.7	-2.9	515f/806r better
Aliiroseovarius	100	97.1	-2.9	515f/806r better
Candidatus Hepatoplasma	100	97.1	-2.9	515f/806r better
Neisseria	93.2	96.1	-2.9	341f/806r better
AOM-SR-B11	95.7	98.6	-2.9	341f/806r better
Litchfieldia	95.7	98.6	-2.9	341f/806r better
Acantharea Group I	2.8	0	-2.8	No coverage in 341f/806r
Sutterella	95.5	92.7	-2.8	515f/806r better
Inquilinus	97.1	94.3	-2.8	515f/806r better
Syntrophotalea	97.1	94.3	-2.8	515f/806r better
Psychroserpens	100	97.2	-2.8	515f/806r better
Methylorubrum	88.4	91.2	-2.8	341f/806r better
Runella	88.9	91.7	-2.8	341f/806r better
Paenarthrobacter	91	93.8	-2.8	341f/806r better
Knoellia	94.3	97.1	-2.8	341f/806r better
Glycomyces	94.4	97.2	-2.8	341f/806r better
Holdemanella	94.5	97.3	-2.8	341f/806r better
Sporocytophaga	97.2	100	-2.8	341f/806r better
Thalassobius	97.2	100	-2.8	341f/806r better
Granulicella	94.7	97.4	-2.7	341f/806r better
Nakamurella	94.7	97.4	-2.7	341f/806r better
Glaesserella	97.3	100	-2.7	341f/806r better
Oceanicaulis	97.3	100	-2.7	341f/806r better
Acidibacillus	94.4	91.7	-2.7	515f/806r better
Halodesulfovibrio	94.6	91.9	-2.7	515f/806r better
wb1-A12	94.6	91.9	-2.7	515f/806r better
Candidatus Chlorothrix	96.5	93.8	-2.7	515f/806r better
Pseudooceanicola	97.4	94.7	-2.7	515f/806r better
Desulfofundulus	100	97.3	-2.7	515f/806r better
Rosenbergiella	76.3	78.9	-2.6	341f/806r better
UCG-012	89.6	92.2	-2.6	341f/806r better
Mesohalobacter	92.3	94.9	-2.6	341f/806r better
Polycyclovorans	92.3	94.9	-2.6	341f/806r better
Oceanobacillus	93.3	95.9	-2.6	341f/806r better
Halogeometricum	94.6	97.2	-2.6	341f/806r better
Hoylesella	95.1	97.7	-2.6	341f/806r better
Anaerococcus	95.6	98.2	-2.6	341f/806r better
Milano-WF1B-03	92.1	89.5	-2.6	515f/806r better
Marinoscillum	93.3	90.7	-2.6	515f/806r better
Ignavibacterium	93.4	90.8	-2.6	515f/806r better
Desmonostoc PCC-7422	94.7	92.1	-2.6	515f/806r better
Desulfomicrobium	94.7	92.1	-2.6	515f/806r better
Ketobacter	94.9	92.3	-2.6	515f/806r better
Methanocella	96.4	93.8	-2.6	515f/806r better
Methanoculleus	98	95.4	-2.6	515f/806r better
Granulosicoccus	100	97.4	-2.6	515f/806r better
Williamsia	100	97.4	-2.6	515f/806r better
Amphiplicatus	89.7	92.3	-2.6	341f/806r better
Cloacibacterium	91.2	93.8	-2.6	341f/806r better
Haloferax	91.2	93.8	-2.6	341f/806r better
Spirochaeta	93.7	96.3	-2.6	341f/806r better
Cardiobacterium	94.7	97.3	-2.6	341f/806r better
Marmoricola	94.7	97.3	-2.6	341f/806r better
Tautonia	94.9	97.5	-2.6	341f/806r better
Balneola	97.4	100	-2.6	341f/806r better
Candidatus Thiosymbion	97.4	100	-2.6	341f/806r better
Cryomonadida	2.5	0	-2.5	No coverage in 341f/806r
Dactylococcopsis PCC-8305	92.7	90.2	-2.5	515f/806r better
Verticiella	97.4	94.9	-2.5	515f/806r better
Alkalibacterium	97.5	95	-2.5	515f/806r better
Hydrogenobaculum	97.5	95	-2.5	515f/806r better
Ornithinimicrobium	97.6	95.1	-2.5	515f/806r better
GWE2-42-42	98.8	96.3	-2.5	515f/806r better
Pseudochrobactrum	90.2	92.7	-2.5	341f/806r better
Natrinema	92.1	94.6	-2.5	341f/806r better
Marinimicrobium	92.5	95	-2.5	341f/806r better
Actinomycetospora	95	97.5	-2.5	341f/806r better
Baekduia	95	97.5	-2.5	341f/806r better
Dysgonomonas	95	97.5	-2.5	341f/806r better
Gracilimonas	97.5	100	-2.5	341f/806r better
Ruthenibacterium	97.5	100	-2.5	341f/806r better
Siminovitchia	97.5	100	-2.5	341f/806r better
TM7a	97.5	100	-2.5	341f/806r better
Natronococcus	92.5	94.9	-2.4	341f/806r better
Pandoraea	95.1	97.5	-2.4	341f/806r better
BSV13	95.3	97.7	-2.4	341f/806r better
Porticoccus	95.3	97.7	-2.4	341f/806r better
Advenella	97.6	100	-2.4	341f/806r better
Castellaniella	97.6	100	-2.4	341f/806r better
Facklamia	97.6	100	-2.4	341f/806r better
NS10 marine group	97.6	100	-2.4	341f/806r better
Pseudoclavibacter	97.6	100	-2.4	341f/806r better
Cellulosimicrobium	92.9	90.5	-2.4	515f/806r better
Sinomonas	95.1	92.7	-2.4	515f/806r better
Xanthobacter	97.7	95.3	-2.4	515f/806r better
Cellulosilyticum	100	97.6	-2.4	515f/806r better
Salinisphaera	100	97.6	-2.4	515f/806r better
Kribbella	91.4	93.8	-2.4	341f/806r better
Veillonellaceae UCG-001	92.7	95.1	-2.4	341f/806r better
Bremerella	93.9	96.3	-2.4	341f/806r better
Haloparvum	94.7	97.1	-2.4	341f/806r better
Nitrosomonas	95.2	97.6	-2.4	341f/806r better
Barnesiella	96.4	98.8	-2.4	341f/806r better
Streptophyta	9.2	6.9	-2.3	Similar 'poor' coverage
Moheibacter	90.7	88.4	-2.3	515f/806r better
Halanaerobium	94.7	92.4	-2.3	515f/806r better
Desulfosarcina	95.6	93.3	-2.3	515f/806r better
Methanospirillum	95.6	93.3	-2.3	515f/806r better
Curvibacter	97.8	95.5	-2.3	515f/806r better
Pedobacter	98.1	95.8	-2.3	515f/806r better
Solobacterium	98.9	96.6	-2.3	515f/806r better
Enhydrobacter	90.9	93.2	-2.3	341f/806r better
Pelagibacterium	90.9	93.2	-2.3	341f/806r better
Agathobaculum	91.2	93.5	-2.3	341f/806r better
Asticcacaulis	93.3	95.6	-2.3	341f/806r better
Methanocorpusculum	95.3	97.6	-2.3	341f/806r better
Maritimimonas	97	99.3	-2.3	341f/806r better
Haloplanus	97.7	100	-2.3	341f/806r better
Modestobacter	97.7	100	-2.3	341f/806r better
Exiguobacterium	87.7	89.9	-2.2	341f/806r better
Shouchella	89.2	91.4	-2.2	341f/806r better
Flavitalea	91.3	93.5	-2.2	341f/806r better
Phaeodactylibacter	92.2	94.4	-2.2	341f/806r better
Methylobacterium	92.8	95	-2.2	341f/806r better
Anaerocolumna	93.5	95.7	-2.2	341f/806r better
Robiginitalea	93.5	95.7	-2.2	341f/806r better
Balneicella	94.6	96.8	-2.2	341f/806r better
Zoogloea	95.6	97.8	-2.2	341f/806r better
Parvimonas	95.7	97.9	-2.2	341f/806r better
Thermoanaerobacterium	95.7	97.9	-2.2	341f/806r better
Acetobacterium	96.7	98.9	-2.2	341f/806r better
UCG-004	97.3	99.5	-2.2	341f/806r better
Actinobacillus	97.5	99.7	-2.2	341f/806r better
Clavibacter	97.8	100	-2.2	341f/806r better
Roseobacter	93.3	91.1	-2.2	515f/806r better
Draconibacterium	93.5	91.3	-2.2	515f/806r better
Roseateles	95	92.8	-2.2	515f/806r better
Syntrophobacter	96.6	94.4	-2.2	515f/806r better
Paeniclostridium	97.7	95.5	-2.2	515f/806r better
Aquamicrobium	97.8	95.6	-2.2	515f/806r better
Bartonella	99.3	97.1	-2.2	515f/806r better
Loigolactobacillus	100	97.8	-2.2	515f/806r better
Sedimentibacter	91.9	94.1	-2.2	341f/806r better
Anoxybacillus	89.1	91.2	-2.1	341f/806r better
Nitrosospira	91.8	93.9	-2.1	341f/806r better
Methanohalophilus	92.3	94.4	-2.1	341f/806r better
Candidatus Symbiobacter	93.6	95.7	-2.1	341f/806r better
Limibaculum	93.6	95.7	-2.1	341f/806r better
Achromobacter	93.8	95.9	-2.1	341f/806r better
Epulopiscium	94.8	96.9	-2.1	341f/806r better
Petrimonas	95.7	93.6	-2.1	515f/806r better
Segatella	95.9	93.8	-2.1	515f/806r better
Schlesneria	97.8	95.7	-2.1	515f/806r better
Flavonifractor	97.9	95.8	-2.1	515f/806r better
Georgenia	98	95.9	-2.1	515f/806r better
Geomonas	98.9	96.8	-2.1	515f/806r better
Candidatus Nitrosopelagicus	100	97.9	-2.1	515f/806r better
Desulfotomaculum	100	97.9	-2.1	515f/806r better
Dokdonia	100	97.9	-2.1	515f/806r better
Halonotius	100	97.9	-2.1	515f/806r better
RS62 marine group	100	97.9	-2.1	515f/806r better
Diaphorobacter	91.4	93.5	-2.1	341f/806r better
Xenorhabdus	93.7	95.8	-2.1	341f/806r better
Butyribacter	95.2	97.3	-2.1	341f/806r better
Curtobacterium	95.7	97.8	-2.1	341f/806r better
Frankia	95.7	97.8	-2.1	341f/806r better
Actinophytocola	95.9	98	-2.1	341f/806r better
Amaricoccus	97.9	100	-2.1	341f/806r better
Faecalicatena	97.9	100	-2.1	341f/806r better
Mesoplasma	97.9	100	-2.1	341f/806r better
Paenisporosarcina	97.9	100	-2.1	341f/806r better
Arenimicrobium	86.3	84.3	-2	515f/806r better
Methanoregula	89.2	87.2	-2	515f/806r better
Mammaliicoccus	90.5	88.5	-2	515f/806r better
Nitrosarchaeum	95.2	93.2	-2	515f/806r better
Erwinia	96	94	-2	515f/806r better
Gottfriedia	96.2	94.2	-2	515f/806r better
Adlercreutzia	97.4	95.4	-2	515f/806r better
Acidaminobacter	100	98	-2	515f/806r better
Geobacillus	90.1	92.1	-2	341f/806r better
Blastococcus	92.2	94.2	-2	341f/806r better
Neobacillus	95.5	97.5	-2	341f/806r better
Methanomethylovorans	95.9	97.9	-2	341f/806r better
Bdellovibrio	96	98	-2	341f/806r better
Sva0081 sediment group	96.1	98.1	-2	341f/806r better
C1-B045	97	99	-2	341f/806r better
Halobacteriovorax	97	99	-2	341f/806r better
Desulfocucumis	98	100	-2	341f/806r better
Desulfosudis	98	100	-2	341f/806r better
F0332	98	100	-2	341f/806r better
Peptococcus	98	100	-2	341f/806r better
Tsukamurella	98	100	-2	341f/806r better
Gracilibacter	88.5	90.4	-1.9	341f/806r better
Rahnella	89.6	91.5	-1.9	341f/806r better
Ligilactobacillus	90.5	92.4	-1.9	341f/806r better
Stenotrophomonas	91.5	93.4	-1.9	341f/806r better
Marinicella	94.5	96.4	-1.9	341f/806r better
Nonlabens	94.5	96.4	-1.9	341f/806r better
Cytophaga	96.1	98	-1.9	341f/806r better
Slackia	96.1	98	-1.9	341f/806r better
Pelotalea	97.5	99.4	-1.9	341f/806r better
Sulfuriferula	98.1	100	-1.9	341f/806r better
Anaerotruncus	94.1	92.2	-1.9	515f/806r better
Geobacter	96.3	94.4	-1.9	515f/806r better
Parapedobacter	98	96.1	-1.9	515f/806r better
Ruminiclostridium	98.5	96.6	-1.9	515f/806r better
Azospira	100	98.1	-1.9	515f/806r better
Lachnoanaerobaculum	94.4	96.3	-1.9	341f/806r better
Roseimarinus	94.4	96.3	-1.9	341f/806r better
Acetivibrio	96.2	98.1	-1.9	341f/806r better
Daejeonia	96.2	98.1	-1.9	341f/806r better
Methylobacter	96.2	98.1	-1.9	341f/806r better
Kocuria	89.6	91.4	-1.8	341f/806r better
Nordella	94.6	96.4	-1.8	341f/806r better
Novosphingobium	94.6	96.4	-1.8	341f/806r better
Dichotomicrobium	89.5	87.7	-1.8	515f/806r better
Pusillimonas	94.5	92.7	-1.8	515f/806r better
Variovorax	95.1	93.3	-1.8	515f/806r better
Buttiauxella	96.5	94.7	-1.8	515f/806r better
Candidatus Scalindua	98.1	96.3	-1.8	515f/806r better
Desulfopila	98.1	96.3	-1.8	515f/806r better
Fischerella PCC-9339	98.1	96.3	-1.8	515f/806r better
Microbispora	98.1	96.3	-1.8	515f/806r better
Kurthia	100	98.2	-1.8	515f/806r better
Paraclostridium	88.9	90.7	-1.8	341f/806r better
Tumebacillus	90.7	92.5	-1.8	341f/806r better
Proteus	93	94.8	-1.8	341f/806r better
Neorhizobium	94.8	96.6	-1.8	341f/806r better
Sulfurospirillum	95.2	97	-1.8	341f/806r better
Aquicella	95.8	97.6	-1.8	341f/806r better
Fusicatenibacter	96	97.8	-1.8	341f/806r better
Methyloprofundus	96.4	98.2	-1.8	341f/806r better
Butyricimonas	98.2	100	-1.8	341f/806r better
Candidatus Latescibacter	98.2	100	-1.8	341f/806r better
Hassallia	98.2	100	-1.8	341f/806r better
Mesomycoplasma	98.2	100	-1.8	341f/806r better
Rouxiella	98.2	100	-1.8	341f/806r better
Thiohalocapsa	86.2	87.9	-1.7	341f/806r better
Skermanella	90	91.7	-1.7	341f/806r better
Lacticaseibacillus	92.5	94.2	-1.7	341f/806r better
Nannocystis	93.1	94.8	-1.7	341f/806r better
Niabella	93.3	95	-1.7	341f/806r better
Brevibacillus	93.6	95.3	-1.7	341f/806r better
Leptospirillum	93.8	95.5	-1.7	341f/806r better
Croceibacterium	94.1	95.8	-1.7	341f/806r better
Polynucleobacter	94.7	96.4	-1.7	341f/806r better
Jeotgalicoccus	95	96.7	-1.7	341f/806r better
Shewanella	95.7	97.4	-1.7	341f/806r better
Niastella	96.5	98.2	-1.7	341f/806r better
Tychonema CCAP 1459-11B	96.5	98.2	-1.7	341f/806r better
Pseudoleptotrichia	96.6	98.3	-1.7	341f/806r better
Propionibacterium	96.7	98.4	-1.7	341f/806r better
Cypionkella	98.3	100	-1.7	341f/806r better
Saccharothrix	98.3	100	-1.7	341f/806r better
Candidatus Nitrosotenuis	90.6	88.9	-1.7	515f/806r better
Intestinibacter	93.1	91.4	-1.7	515f/806r better
Acidithiobacillus	94.1	92.4	-1.7	515f/806r better
Caldicoprobacter	95.9	94.2	-1.7	515f/806r better
Virgibacillus	96.6	94.9	-1.7	515f/806r better
Mogibacterium	97.2	95.5	-1.7	515f/806r better
Candidatus Sulcia	97.4	95.7	-1.7	515f/806r better
Ahniella	98.3	96.6	-1.7	515f/806r better
Gemmobacter	98.3	96.6	-1.7	515f/806r better
Caulobacter	99.4	97.7	-1.7	515f/806r better
Rhodovulum	100	98.3	-1.7	515f/806r better
Methylophaga	91.8	93.4	-1.6	341f/806r better
[Ruminococcus] gnavus group	92.8	94.4	-1.6	341f/806r better
Enterocloster	93.1	94.7	-1.6	341f/806r better
Anaerostipes	93.8	95.4	-1.6	341f/806r better
Mesobacillus	94.6	96.2	-1.6	341f/806r better
Sphingorhabdus	95.1	96.7	-1.6	341f/806r better
Ellin6067	95.6	97.2	-1.6	341f/806r better
Desulfocastanea	96.1	97.7	-1.6	341f/806r better
Lichenibacterium	96.8	98.4	-1.6	341f/806r better
Pseudovibrio	90.3	88.7	-1.6	515f/806r better
Desertimonas	91.8	90.2	-1.6	515f/806r better
Psychrobacillus	92.2	90.6	-1.6	515f/806r better
Geodermatophilus	93.8	92.2	-1.6	515f/806r better
Pseudofulvibacter	94.6	93	-1.6	515f/806r better
Nonomuraea	94.9	93.3	-1.6	515f/806r better
Reyranella	96.8	95.2	-1.6	515f/806r better
Natronomonas	97.5	95.9	-1.6	515f/806r better
Butyrivibrio	98	96.4	-1.6	515f/806r better
Oxobacter	98.4	96.8	-1.6	515f/806r better
Caenimonas	100	98.4	-1.6	515f/806r better
Polaromonas	94.2	95.8	-1.6	341f/806r better
Edwardsiella	95.2	96.8	-1.6	341f/806r better
Lachnospiraceae UCG-006	95.7	97.3	-1.6	341f/806r better
OM60(NOR5) clade	95.7	97.3	-1.6	341f/806r better
Faecalibaculum	96	97.6	-1.6	341f/806r better
Marinobacterium	96	97.6	-1.6	341f/806r better
Atopostipes	96.7	98.3	-1.6	341f/806r better
Mannheimia	96.9	98.5	-1.6	341f/806r better
Lachnospiraceae UCG-004	97.9	99.5	-1.6	341f/806r better
Occallatibacter	98.4	100	-1.6	341f/806r better
Chromobacterium	85.1	83.6	-1.5	515f/806r better
Delftia	90.4	88.9	-1.5	515f/806r better
Roseibacillus	95.2	93.7	-1.5	515f/806r better
Yoonia	97	95.5	-1.5	515f/806r better
Haloarcula	98.1	96.6	-1.5	515f/806r better
Solibacillus	98.5	97	-1.5	515f/806r better
Lysobacter	91.2	92.7	-1.5	341f/806r better
Halochromatium	91.3	92.8	-1.5	341f/806r better
Vicingus	92.5	94	-1.5	341f/806r better
Alcanivorax	92.6	94.1	-1.5	341f/806r better
Sphingobacterium	93.5	95	-1.5	341f/806r better
Aneurinibacillus	94	95.5	-1.5	341f/806r better
Oscillibacter	94	95.5	-1.5	341f/806r better
Janibacter	94.1	95.6	-1.5	341f/806r better
Leptotrichia	94.9	96.4	-1.5	341f/806r better
Rhodococcus	94.9	96.4	-1.5	341f/806r better
Chromohalobacter	95.4	96.9	-1.5	341f/806r better
R76-B128	95.4	96.9	-1.5	341f/806r better
Tundrisphaera	95.4	96.9	-1.5	341f/806r better
Urania-1B-19 marine sediment group	95.4	96.9	-1.5	341f/806r better
Megamonas	95.5	97	-1.5	341f/806r better
Sporolactobacillus	95.5	97	-1.5	341f/806r better
Daejeonella	95.6	97.1	-1.5	341f/806r better
Ensifer	95.6	97.1	-1.5	341f/806r better
Rheinheimera	96	97.5	-1.5	341f/806r better
Puniceicoccus	96.3	97.8	-1.5	341f/806r better
Gluconacetobacter	96.9	98.4	-1.5	341f/806r better
Pajaroellobacter	96.9	98.4	-1.5	341f/806r better
Segetibacter	96.9	98.4	-1.5	341f/806r better
Fonticella	97	98.5	-1.5	341f/806r better
Tsuneonella	97	98.5	-1.5	341f/806r better
Dyadobacter	97.7	99.2	-1.5	341f/806r better
Saccharomonospora	90.1	91.5	-1.4	341f/806r better
[Eubacterium] siraeum group	91.8	93.2	-1.4	341f/806r better
Lactobacillus	93.1	94.5	-1.4	341f/806r better
Cocleimonas	94.5	95.9	-1.4	341f/806r better
Gaiella	95.6	97	-1.4	341f/806r better
Peptoniphilus	95.6	97	-1.4	341f/806r better
Helcococcus	97.1	98.5	-1.4	341f/806r better
CAG-352	90.4	89	-1.4	515f/806r better
Salinicoccus	94.2	92.8	-1.4	515f/806r better
Psychrobacter	94.8	93.4	-1.4	515f/806r better
Marine Methylotrophic Group 2	95.8	94.4	-1.4	515f/806r better
Photorhabdus	95.8	94.4	-1.4	515f/806r better
Rectinema	96.6	95.2	-1.4	515f/806r better
Carnobacterium	98.5	97.1	-1.4	515f/806r better
Defluviicoccus	98.7	97.3	-1.4	515f/806r better
Papillibacter	100	98.6	-1.4	515f/806r better
Ferritrophicum	82.4	83.8	-1.4	341f/806r better
Niallia	92.7	94.1	-1.4	341f/806r better
Crossiella	93.7	95.1	-1.4	341f/806r better
Sulfobacillus	94.4	95.8	-1.4	341f/806r better
UCG-003	94.4	95.8	-1.4	341f/806r better
Colwellia	95.2	96.6	-1.4	341f/806r better
Nitrospina	96.4	97.8	-1.4	341f/806r better
Tenacibaculum	98.2	99.6	-1.4	341f/806r better
Aeromonas	94.6	95.9	-1.3	341f/806r better
Pirellula	95.1	96.4	-1.3	341f/806r better
Bacteroides	95.6	96.9	-1.3	341f/806r better
[Eubacterium] eligens group	96.1	97.4	-1.3	341f/806r better
Halioglobus	96.1	97.4	-1.3	341f/806r better
Nesterenkonia	96.1	97.4	-1.3	341f/806r better
Peredibacter	98.1	99.4	-1.3	341f/806r better
Vibrio	95.3	94	-1.3	515f/806r better
Olsenella	97.3	96	-1.3	515f/806r better
Iamia	97.4	96.1	-1.3	515f/806r better
Candidatus Soleaferrea	98.6	97.3	-1.3	515f/806r better
Shuttleworthia	98.7	97.4	-1.3	515f/806r better
Coleofasciculus PCC-7420	86.3	87.6	-1.3	341f/806r better
Levilactobacillus	92.4	93.7	-1.3	341f/806r better
Propionivibrio	93.4	94.7	-1.3	341f/806r better
Planctomicrobium	93.5	94.8	-1.3	341f/806r better
Cohnella	94.2	95.5	-1.3	341f/806r better
Sva0996 marine group	94.8	96.1	-1.3	341f/806r better
Salinibacter	95.8	97.1	-1.3	341f/806r better
Peptoclostridium	96.2	97.5	-1.3	341f/806r better
[Eubacterium] xylanophilum group	96.3	97.6	-1.3	341f/806r better
Singulisphaera	97.3	98.6	-1.3	341f/806r better
Syntrophus	97.3	98.6	-1.3	341f/806r better
Fimbriiglobus	97.4	98.7	-1.3	341f/806r better
Kordiimonas	97.4	98.7	-1.3	341f/806r better
Oribacterium	97.4	98.7	-1.3	341f/806r better
Alicyclobacillus	97.5	98.8	-1.3	341f/806r better
Longilinea	97.5	98.8	-1.3	341f/806r better
Deinococcus	97.7	99	-1.3	341f/806r better
Arachnia	98.7	100	-1.3	341f/806r better
Halococcus	90.5	91.7	-1.2	341f/806r better
Crocinitomix	94	95.2	-1.2	341f/806r better
LS-NOB	94	95.2	-1.2	341f/806r better
Glutamicibacter	94.1	95.3	-1.2	341f/806r better
Lachnoclostridium	94.3	95.5	-1.2	341f/806r better
Desulfobulbus	95.1	96.3	-1.2	341f/806r better
Salegentibacter	95.2	96.4	-1.2	341f/806r better
Pseudidiomarina	96.3	97.5	-1.2	341f/806r better
Hydrogenophaga	96.5	97.7	-1.2	341f/806r better
Methylomonas	97.6	98.8	-1.2	341f/806r better
Desulfobacter	97.7	98.9	-1.2	341f/806r better
Sumerlaea	97.7	98.9	-1.2	341f/806r better
Aliivibrio	98.8	100	-1.2	341f/806r better
Fictibacillus	91.9	90.7	-1.2	515f/806r better
Seongchinamella	92.8	91.6	-1.2	515f/806r better
Lactococcus	93.8	92.6	-1.2	515f/806r better
Enterococcus	93.9	92.7	-1.2	515f/806r better
Halomonas	95	93.8	-1.2	515f/806r better
Rickettsia	96.9	95.7	-1.2	515f/806r better
Agrococcus	97.4	96.2	-1.2	515f/806r better
Aminobacter	97.8	96.6	-1.2	515f/806r better
Kitasatospora	98.2	97	-1.2	515f/806r better
Dechloromonas	92.8	93.9	-1.1	341f/806r better
Tranquillimonas	94.8	95.9	-1.1	341f/806r better
Veillonella	94.8	95.9	-1.1	341f/806r better
Pseudonocardia	95.3	96.4	-1.1	341f/806r better
Chitinophaga	96.6	97.7	-1.1	341f/806r better
Devosia	96.6	97.7	-1.1	341f/806r better
Thermovirga	96.6	97.7	-1.1	341f/806r better
Candidatus Competibacter	96.8	97.9	-1.1	341f/806r better
Roseobacter clade NAC11-7 lineage	97.8	98.9	-1.1	341f/806r better
Tetrasphaera	97.8	98.9	-1.1	341f/806r better
Heteromita	1.1	0	-1.1	No coverage in 341f/806r
Rubrobacter	93.1	92	-1.1	515f/806r better
Ralstonia	94.7	93.6	-1.1	515f/806r better
Saccharopolyspora	95.7	94.6	-1.1	515f/806r better
Lutispora	96.9	95.8	-1.1	515f/806r better
Pectobacterium	97.3	96.2	-1.1	515f/806r better
Sporomusa	99	97.9	-1.1	515f/806r better
Microbulbifer	100	98.9	-1.1	515f/806r better
Raoultella	88.5	89.6	-1.1	341f/806r better
Ramlibacter	94	95.1	-1.1	341f/806r better
Calothrix PCC-6303	94.4	95.5	-1.1	341f/806r better
Desulfatiglans	94.9	96	-1.1	341f/806r better
Thermoanaerobacter	95.5	96.6	-1.1	341f/806r better
Proteiniphilum	96	97.1	-1.1	341f/806r better
Ellin6055	96.7	97.8	-1.1	341f/806r better
Oleiharenicola	98.9	100	-1.1	341f/806r better
Marivibrio	88	87	-1	Similar coverage
Candidatus Nitrososphaera	89.1	88.1	-1	Similar coverage
Metakinetoplastina	95.8	94.8	-1	Similar coverage
Halorubrum	96.2	95.2	-1	Similar coverage
Erythrobacter	97	96	-1	Similar coverage
Hyphomonas	97.2	96.2	-1	Similar coverage
Opitutus	97.2	96.2	-1	Similar coverage
Defluviitaleaceae UCG-011	98.1	97.1	-1	Similar coverage
Paludibaculum	98.1	97.1	-1	Similar coverage
Sphingopyxis	98.6	97.6	-1	Similar coverage
Halalkalibacter	76.4	77.4	-1	Similar coverage
SAR92 clade	93.8	94.8	-1	Similar coverage
Roseburia	94.3	95.3	-1	Similar coverage
Aeromicrobium	94.7	95.7	-1	Similar coverage
Cellvibrio	95	96	-1	Similar coverage
Odoribacter	95.1	96.1	-1	Similar coverage
Lachnospiraceae NK4A136 group	95.2	96.2	-1	Similar coverage
Sediminibacterium	95.8	96.8	-1	Similar coverage
Otariodibacter	95.9	96.9	-1	Similar coverage
Prevotellaceae UCG-004	96	97	-1	Similar coverage
Cyanobium PCC-6307	96.1	97.1	-1	Similar coverage
Idiomarina	96.2	97.2	-1	Similar coverage
Luteolibacter	96.2	97.2	-1	Similar coverage
SM1A02	96.5	97.5	-1	Similar coverage
Leifsonia	98	99	-1	Similar coverage
Acidothermus	99	100	-1	Similar coverage
Arsenophonus	99	100	-1	Similar coverage
Thermococcus	90.8	91.7	-0.9	Similar coverage
Plesiomonas	93.5	94.4	-0.9	Similar coverage
Thalassotalea	94.1	95	-0.9	Similar coverage
Lachnospiraceae NK3A20 group	95.8	96.7	-0.9	Similar coverage
Acutalibacter	96.3	97.2	-0.9	Similar coverage
Prevotellaceae NK3B31 group	96.5	97.4	-0.9	Similar coverage
Salinivenus	96.6	97.5	-0.9	Similar coverage
Rhodoferax	97.1	98	-0.9	Similar coverage
Sulfurovum	97.1	98	-0.9	Similar coverage
Actinoplanes	97.3	98.2	-0.9	Similar coverage
Anaerolinea	97.3	98.2	-0.9	Similar coverage
Fluviicola	97.8	98.7	-0.9	Similar coverage
Sporosarcina	98.6	99.5	-0.9	Similar coverage
Kingella	99.1	100	-0.9	Similar coverage
Methylophilus	92.9	92	-0.9	Similar coverage
Candidatus Saccharimonas	96.4	95.5	-0.9	Similar coverage
Microbacterium	96.7	95.8	-0.9	Similar coverage
Aquibacter	97.2	96.3	-0.9	Similar coverage
Gemmiger	97.4	96.5	-0.9	Similar coverage
Marine Group III	98.2	97.3	-0.9	Similar coverage
Terrisporobacter	98.2	97.3	-0.9	Similar coverage
Desulfuromonas	99	98.1	-0.9	Similar coverage
Lewinella	99	98.1	-0.9	Similar coverage
Muricauda	99.1	98.2	-0.9	Similar coverage
Clade Ib	99.2	98.3	-0.9	Similar coverage
Buchnera	100	99.1	-0.9	Similar coverage
RBG-16-49-21	90.4	91.3	-0.9	Similar coverage
SUP05 cluster	91.2	92.1	-0.9	Similar coverage
Prevotellaceae UCG-001	92.2	93.1	-0.9	Similar coverage
Bradyrhizobium	94.2	95.1	-0.9	Similar coverage
Clade Ia	95.9	96.8	-0.9	Similar coverage
GCA-900066575	97.2	98.1	-0.9	Similar coverage
Salmonella	97.9	98.8	-0.9	Similar coverage
Agrobacterium	94.6	95.4	-0.8	Similar coverage
Marinobacter	94.6	95.4	-0.8	Similar coverage
Leptolinea	96.1	96.9	-0.8	Similar coverage
Truepera	96.1	96.9	-0.8	Similar coverage
Priestia	89.9	89.1	-0.8	Similar coverage
Dietzia	93.3	92.5	-0.8	Similar coverage
Luteimonas	95.5	94.7	-0.8	Similar coverage
Megasphaera	95.6	94.8	-0.8	Similar coverage
UCG-002	96.5	95.7	-0.8	Similar coverage
Undibacterium	96.6	95.8	-0.8	Similar coverage
Adhaeribacter	98.3	97.5	-0.8	Similar coverage
Dongia	91	91.8	-0.8	Similar coverage
Limosilactobacillus	93.8	94.6	-0.8	Similar coverage
Acinetobacter	93.9	94.7	-0.8	Similar coverage
Arcobacter	95.5	96.3	-0.8	Similar coverage
Coprococcus	96	96.8	-0.8	Similar coverage
Paracoccus	96.3	97.1	-0.8	Similar coverage
CL500-29 marine group	96.9	97.7	-0.8	Similar coverage
Pasteurella	98.3	99.1	-0.8	Similar coverage
[Eubacterium] oxidoreducens group	98.4	99.2	-0.8	Similar coverage
Lactiplantibacillus	90.8	91.5	-0.7	Similar coverage
Turicibacter	91.7	92.4	-0.7	Similar coverage
Pseudarthrobacter	94.1	94.8	-0.7	Similar coverage
Herbaspirillum	95.1	95.8	-0.7	Similar coverage
Mediterraneibacter	96.2	96.9	-0.7	Similar coverage
Tyzzerella	96.2	96.9	-0.7	Similar coverage
Ruegeria	96.6	97.3	-0.7	Similar coverage
Chthoniobacter	96.7	97.4	-0.7	Similar coverage
Marinomonas	96.7	97.4	-0.7	Similar coverage
Steroidobacter	96.8	97.5	-0.7	Similar coverage
Candidatus Solibacter	97.1	97.8	-0.7	Similar coverage
Desulfosporosinus	97.2	97.9	-0.7	Similar coverage
Acidiphilium	98	98.7	-0.7	Similar coverage
Phocoenobacter	99.3	100	-0.7	Similar coverage
Leyella	95	94.3	-0.7	Similar coverage
Nocardiopsis	96.2	95.5	-0.7	Similar coverage
Winogradskyella	97.7	97	-0.7	Similar coverage
NS4 marine group	97.9	97.2	-0.7	Similar coverage
Spiroplasma	98.1	97.4	-0.7	Similar coverage
Parendozoicomonas	82.9	83.6	-0.7	Similar coverage
MND1	92.4	93.1	-0.7	Similar coverage
Desulfovibrio	94.9	95.6	-0.7	Similar coverage
Faecalimonas	94.9	95.6	-0.7	Similar coverage
Cellulomonas	97.4	98.1	-0.7	Similar coverage
Lachnospira	97.9	98.6	-0.7	Similar coverage
Hymenobacter	98.4	99.1	-0.7	Similar coverage
Kosakonia	91.1	91.7	-0.6	Similar coverage
Microvirga	94.1	94.7	-0.6	Similar coverage
Pseudoalteromonas	94.3	94.9	-0.6	Similar coverage
Bryobacter	94.6	95.2	-0.6	Similar coverage
Tissierella	95.1	95.7	-0.6	Similar coverage
Sarcina	95.8	96.4	-0.6	Similar coverage
Sulfurimonas	95.8	96.4	-0.6	Similar coverage
[Ruminococcus] gauvreauii group	96.1	96.7	-0.6	Similar coverage
Fusibacter	96.1	96.7	-0.6	Similar coverage
Erysipelothrix	96.8	97.4	-0.6	Similar coverage
Acidianus	85.2	84.6	-0.6	Similar coverage
Acidovorax	90.8	90.2	-0.6	Similar coverage
Endozoicomonas	93.4	92.8	-0.6	Similar coverage
Citrobacter	94.2	93.6	-0.6	Similar coverage
Sulfuricurvum	94.5	93.9	-0.6	Similar coverage
Pseudolabrys	95.3	94.7	-0.6	Similar coverage
JGI 0001001-H03	95.5	94.9	-0.6	Similar coverage
Aminicenans	95.6	95	-0.6	Similar coverage
Thermus	96.6	96	-0.6	Similar coverage
Mesorhizobium	97.6	97	-0.6	Similar coverage
Thiothrix	97.8	97.2	-0.6	Similar coverage
Prevotellaceae UCG-003	98.1	97.5	-0.6	Similar coverage
Fuscovulum	98.7	98.1	-0.6	Similar coverage
Leuconostoc	89	89.6	-0.6	Similar coverage
Lysinibacillus	92.2	92.8	-0.6	Similar coverage
Rhizobacter	94.7	95.3	-0.6	Similar coverage
Halobacillus	95.7	96.3	-0.6	Similar coverage
Syntrophomonas	95.7	96.3	-0.6	Similar coverage
CSP1-2	96.5	97.1	-0.6	Similar coverage
Blautia	96.7	97.3	-0.6	Similar coverage
Blastocatella	97	97.6	-0.6	Similar coverage
Endomicrobium	97.5	98.1	-0.6	Similar coverage
Lachnospiraceae FCS020 group	97.5	98.1	-0.6	Similar coverage
Collinsella	98.2	98.8	-0.6	Similar coverage
Syntrophorhabdus	98.2	98.8	-0.6	Similar coverage
Mycoplasma	98.9	99.5	-0.6	Similar coverage
Mycoplasmopsis	99.4	100	-0.6	Similar coverage
WCHB1-32	99.4	100	-0.6	Similar coverage
Escherichia-Shigella	92.3	91.8	-0.5	Similar coverage
Limnobacter	94.1	93.6	-0.5	Similar coverage
Saccharofermentans	94.5	94	-0.5	Similar coverage
Dorea	94.6	94.1	-0.5	Similar coverage
Xylanibacter	97	96.5	-0.5	Similar coverage
Yersinia	99.5	99	-0.5	Similar coverage
Desulfocapsa	93.4	93.9	-0.5	Similar coverage
Acidibacter	93.6	94.1	-0.5	Similar coverage
Peribacillus	93.9	94.4	-0.5	Similar coverage
Fretibacterium	94.5	95	-0.5	Similar coverage
Faecalibacterium	95.2	95.7	-0.5	Similar coverage
Alistipes	95.3	95.8	-0.5	Similar coverage
Nitrospira	95.4	95.9	-0.5	Similar coverage
Roseovarius	95.4	95.9	-0.5	Similar coverage
Agromyces	95.5	96	-0.5	Similar coverage
Clostridium	95.9	96.4	-0.5	Similar coverage
Pseudoxanthomonas	96	96.5	-0.5	Similar coverage
Acholeplasma	96.1	96.6	-0.5	Similar coverage
Leucobacter	96.1	96.6	-0.5	Similar coverage
Acetitomaculum	96.2	96.7	-0.5	Similar coverage
Family XIII AD3011 group	96.2	96.7	-0.5	Similar coverage
Sediminispirochaeta	96.2	96.7	-0.5	Similar coverage
Solirubrobacter	96.2	96.7	-0.5	Similar coverage
Pseudohongiella	96.3	96.8	-0.5	Similar coverage
Colidextribacter	96.4	96.9	-0.5	Similar coverage
Extibacter	96.4	96.9	-0.5	Similar coverage
Polaribacter	96.7	97.2	-0.5	Similar coverage
Arenimonas	97.1	97.6	-0.5	Similar coverage
Thauera	97.1	97.6	-0.5	Similar coverage
Gemmata	97.3	97.8	-0.5	Similar coverage
Lachnospiraceae NC2004 group	97.7	98.2	-0.5	Similar coverage
Lachnospiraceae AC2044 group	98.1	98.6	-0.5	Similar coverage
Leptospira	98.9	99.4	-0.5	Similar coverage
Serratia	93	93.4	-0.4	Similar coverage
Bifidobacterium	96	96.4	-0.4	Similar coverage
Massilia	96.3	96.7	-0.4	Similar coverage
Gemmatimonas	96.5	96.9	-0.4	Similar coverage
UCG-001	96.5	96.9	-0.4	Similar coverage
Amycolatopsis	96.6	97	-0.4	Similar coverage
Actinomadura	96.8	97.2	-0.4	Similar coverage
Akkermansia	88.9	88.5	-0.4	Similar coverage
Azospirillum	94.1	93.7	-0.4	Similar coverage
Methanothrix	94.8	94.4	-0.4	Similar coverage
Anaerovorax	97.2	96.8	-0.4	Similar coverage
Lachnospiraceae ND3007 group	97.9	97.5	-0.4	Similar coverage
Weissella	89.9	90.3	-0.4	Similar coverage
Candidatus Phytoplasma	94.9	95.3	-0.4	Similar coverage
Gordonia	95.4	95.8	-0.4	Similar coverage
Termite Treponema cluster	95.4	95.8	-0.4	Similar coverage
Micromonospora	95.9	96.3	-0.4	Similar coverage
Woeseia	95.9	96.3	-0.4	Similar coverage
Fastidiosipila	96.2	96.6	-0.4	Similar coverage
Acetobacter	97.2	97.6	-0.4	Similar coverage
Lachnospiraceae UCG-008	97.7	98.1	-0.4	Similar coverage
Limnohabitans	97.9	98.3	-0.4	Similar coverage
Campylobacter	98.6	98.9	-0.3	Similar coverage
Cupriavidus	94.8	94.5	-0.3	Similar coverage
Ferruginibacter	95.8	95.5	-0.3	Similar coverage
Halopiger	96	95.7	-0.3	Similar coverage
Photobacterium	96.3	96	-0.3	Similar coverage
Thiobacillus	96.7	96.4	-0.3	Similar coverage
Legionella	97.5	97.2	-0.3	Similar coverage
Listeria	97.7	97.4	-0.3	Similar coverage
Anaerobutyricum	97.8	97.5	-0.3	Similar coverage
Monoglobus	98.3	98	-0.3	Similar coverage
Xanthomonas	98.4	98.1	-0.3	Similar coverage
Sphingomonas	95.3	95.6	-0.3	Similar coverage
Candidatus Omnitrophus	96.2	96.5	-0.3	Similar coverage
Acidiferrimicrobium	97.8	98.1	-0.3	Similar coverage
Coxiella	97.9	98.2	-0.3	Similar coverage
Mucilaginibacter	98.4	98.7	-0.3	Similar coverage
Pseudomonas	91.7	91.9	-0.2	Similar coverage
Sphingobium	93	93.2	-0.2	Similar coverage
Klebsiella	93.2	93.4	-0.2	Similar coverage
Brevundimonas	93.5	93.7	-0.2	Similar coverage
Ruminococcus	96.1	96.3	-0.2	Similar coverage
Chryseobacterium	97.8	98	-0.2	Similar coverage
Helicobacter	98.3	98.5	-0.2	Similar coverage
Bordetella	98.7	98.9	-0.2	Similar coverage
Pantoea	93.2	93	-0.2	Similar coverage
Hadarchaeum	93.6	93.4	-0.2	Similar coverage
Incertae Sedis	95.4	95.2	-0.2	Similar coverage
Burkholderia-Caballeronia-Paraburkholderia	95.8	95.6	-0.2	Similar coverage
NK4A214 group	96.7	96.5	-0.2	Similar coverage
UCG-005	97.1	96.9	-0.2	Similar coverage
Candidatus Nitrosoarchaeum	97.5	97.3	-0.2	Similar coverage
Brucella	97.6	97.4	-0.2	Similar coverage
Mycobacterium	98.2	98	-0.2	Similar coverage
Nocardia	98.7	98.5	-0.2	Similar coverage
Subgroup 10	93.9	94.1	-0.2	Similar coverage
Treponema	97.4	97.6	-0.2	Similar coverage
Selenomonas	98.4	98.6	-0.2	Similar coverage
Agathobacter	95.6	95.7	-0.1	Similar coverage
Marine Benthic Group D and DHVEG-1	97.1	97.2	-0.1	Similar coverage
Bacillus	90.3	90.2	-0.1	Similar coverage
Arthrobacter	96.3	96.2	-0.1	Similar coverage
Candidatus Methanomethylicus	96.4	96.3	-0.1	Similar coverage
Paenibacillus	96.5	96.4	-0.1	Similar coverage
Rikenellaceae RC9 gut group	96.5	96.4	-0.1	Similar coverage
Halorussus	97	96.9	-0.1	Similar coverage
Halobellus	97.7	97.6	-0.1	Similar coverage
Candidatus Caldiarchaeum	98.3	98.2	-0.1	Similar coverage
Candidatus Methanoperedens	98.9	98.8	-0.1	Similar coverage
Conthreep	71.9	72	-0.1	Similar coverage
Enterobacter	91.9	92	-0.1	Similar coverage
Flavobacterium	96.4	96.5	-0.1	Similar coverage
Streptomyces	96.5	96.6	-0.1	Similar coverage
Christensenellaceae R-7 group	97.2	97.3	-0.1	Similar coverage
Nocardioides	97.5	97.6	-0.1	Similar coverage
Devescovina	20	20	0	Similar 'poor' coverage
Allosalinactinospora	50	50	0	Similar coverage
Paradevosia	50	50	0	Similar coverage
Phaeochromatium	50	50	0	Similar coverage
Pseudomaricurvus	50	50	0	Similar coverage
Thermanaerothrix	50	50	0	Similar coverage
Thermolongibacillus	50	50	0	Similar coverage
Thermorudis	50	50	0	Similar coverage
YB-42	60	60	0	Similar coverage
Aminomonas	66.7	66.7	0	Similar coverage
Candidatus Anammoxoglobus	66.7	66.7	0	Similar coverage
Gloeotrichia SAG 32.84	66.7	66.7	0	Similar coverage
Jahnella	66.7	66.7	0	Similar coverage
Lachnobacterium	66.7	66.7	0	Similar coverage
Leptolyngbya LEGE-06070	66.7	66.7	0	Similar coverage
Merismopedia 0BB39S01	66.7	66.7	0	Similar coverage
Methylomarinovum	66.7	66.7	0	Similar coverage
Tepidicella	66.7	66.7	0	Similar coverage
Timonella	66.7	66.7	0	Similar coverage
Rhodocytophaga	70	70	0	Similar coverage
Desulfocurvibacter	71.4	71.4	0	Similar coverage
Frischella	71.4	71.4	0	Similar coverage
Aquisalibacillus	75	75	0	Similar coverage
Chishuiella	75	75	0	Similar coverage
Limisphaera	75	75	0	Similar coverage
Marimicrobium	75	75	0	Similar coverage
Mucinivorans	75	75	0	Similar coverage
Naasia	75	75	0	Similar coverage
Pantalinema	75	75	0	Similar coverage
s3t2d-1089	75	75	0	Similar coverage
UC5-1-2E3	75	75	0	Similar coverage
Parviterribacter	76.9	76.9	0	Similar coverage
Nosocomiicoccus	77.8	77.8	0	Similar coverage
possible genus Sk003-Sk004	77.8	77.8	0	Similar coverage
Prevotellaceae YAB2003 group	77.8	77.8	0	Similar coverage
Defluviitoga	79.4	79.4	0	Similar coverage
Bowdeniella	80	80	0	Similar coverage
Candidatus Nucleicultrix	80	80	0	Similar coverage
Crassaminicella	80	80	0	Similar coverage
Desulfovectis	80	80	0	Similar coverage
Leptolyngbya Es-Yyy1000	80	80	0	Similar coverage
Microterricola	80	80	0	Similar coverage
Oxynema BDU 92071	80	80	0	Similar coverage
Paraperlucidibaca	80	80	0	Similar coverage
Rhodohalobacter	80	80	0	Similar coverage
Stenotrophobium	80	80	0	Similar coverage
Wenjunlia	80	80	0	Similar coverage
Sutcliffiella	80.2	80.2	0	Similar coverage
Thermothrix	81.3	81.3	0	Similar coverage
Anaerobacillus	81.4	81.4	0	Similar coverage
Constrictibacter	81.8	81.8	0	Similar coverage
Evansella	81.8	81.8	0	Similar coverage
Hyunsoonleella	81.8	81.8	0	Similar coverage
Litorilinea	82.6	82.6	0	Similar coverage
Magnetovibrio	82.6	82.6	0	Similar coverage
Pyramidobacter	82.6	82.6	0	Similar coverage
Candidatus Endobugula	83.3	83.3	0	Similar coverage
Candidatus Lariskella	83.3	83.3	0	Similar coverage
FFCH5858	83.3	83.3	0	Similar coverage
Lachnotalea	83.3	83.3	0	Similar coverage
Loriellopsis LF-B5	83.3	83.3	0	Similar coverage
Pseudoxanthobacter	83.3	83.3	0	Similar coverage
Salirhabdus	83.3	83.3	0	Similar coverage
Seohaeicola	83.3	83.3	0	Similar coverage
Synechocystis BDHKU-20401	83.3	83.3	0	Similar coverage
Thermoflavifilum	83.3	83.3	0	Similar coverage
Thermovenabulum	83.3	83.3	0	Similar coverage
Mesonia	84	84	0	Similar coverage
Lyngbya PCC-7419	84.1	84.1	0	Similar coverage
IheB2-23	84.2	84.2	0	Similar coverage
Nitrolancea	84.2	84.2	0	Similar coverage
Aquaspirillum	84.6	84.6	0	Similar coverage
Marivivens	84.6	84.6	0	Similar coverage
Allobacillus	85.7	85.7	0	Similar coverage
Candidatus Brownia	85.7	85.7	0	Similar coverage
Carnimonas	85.7	85.7	0	Similar coverage
Dasania	85.7	85.7	0	Similar coverage
Desulfohalovibrio	85.7	85.7	0	Similar coverage
Gemmatirosa	85.7	85.7	0	Similar coverage
Hephaestia	85.7	85.7	0	Similar coverage
Holdemania	85.7	85.7	0	Similar coverage
Hydrogenothermus	85.7	85.7	0	Similar coverage
Jejudonia	85.7	85.7	0	Similar coverage
Lachnospiraceae UCG-007	85.7	85.7	0	Similar coverage
Nostoc BDU-40302	85.7	85.7	0	Similar coverage
Paramoritella	85.7	85.7	0	Similar coverage
RD011	85.7	85.7	0	Similar coverage
Tepidisphaera	85.7	85.7	0	Similar coverage
Umboniibacter	85.7	85.7	0	Similar coverage
Wenxinia	85.7	85.7	0	Similar coverage
Aestuariibacter	86.4	86.4	0	Similar coverage
M2PB4-61 termite group	86.4	86.4	0	Similar coverage
Candidatus Kuenenia	86.7	86.7	0	Similar coverage
Coprothermobacter	86.7	86.7	0	Similar coverage
Metallibacterium	86.7	86.7	0	Similar coverage
Propionigenium	86.7	86.7	0	Similar coverage
Candidatus Entotheonella	87.1	87.1	0	Similar coverage
Atopococcus	87.5	87.5	0	Similar coverage
Bizionia	87.5	87.5	0	Similar coverage
Candidatus Aenigmarchaeum	87.5	87.5	0	Similar coverage
Candidatus Bealeia	87.5	87.5	0	Similar coverage
Chitiniphilus	87.5	87.5	0	Similar coverage
Hydrotalea	87.5	87.5	0	Similar coverage
Longimycelium	87.5	87.5	0	Similar coverage
Malonomonas	87.5	87.5	0	Similar coverage
Maribellus	87.5	87.5	0	Similar coverage
Pelagicola	87.5	87.5	0	Similar coverage
Pluralibacter	87.5	87.5	0	Similar coverage
Pseudoduganella	87.5	87.5	0	Similar coverage
Salinibaculum	87.5	87.5	0	Similar coverage
Smaragdicoccus	87.5	87.5	0	Similar coverage
Tistlia	87.5	87.5	0	Similar coverage
Paucilactobacillus	88	88	0	Similar coverage
Alkaliflexus	88.2	88.2	0	Similar coverage
Anaerospora	88.2	88.2	0	Similar coverage
Candidatus Planktoluna	88.2	88.2	0	Similar coverage
Meniscus	88.2	88.2	0	Similar coverage
Arachidicoccus	88.9	88.9	0	Similar coverage
Asteroleplasma	88.9	88.9	0	Similar coverage
Blastomonas	88.9	88.9	0	Similar coverage
Desulfonatronovibrio	88.9	88.9	0	Similar coverage
Geitlerinema PCC-8501	88.9	88.9	0	Similar coverage
Lacisediminimonas	88.9	88.9	0	Similar coverage
Methylomarinum	88.9	88.9	0	Similar coverage
Natronincola	88.9	88.9	0	Similar coverage
Paenirhodobacter	88.9	88.9	0	Similar coverage
Planktothricoides SR001	88.9	88.9	0	Similar coverage
Schwartzia	88.9	88.9	0	Similar coverage
Sneathia	88.9	88.9	0	Similar coverage
Sphingomicrobium	88.9	88.9	0	Similar coverage
Ancylomarina	89.1	89.1	0	Similar coverage
Liquorilactobacillus	89.2	89.2	0	Similar coverage
Tatumella	89.2	89.2	0	Similar coverage
Sandaracinomonas	89.3	89.3	0	Similar coverage
Providencia	89.4	89.4	0	Similar coverage
Vogesella	89.4	89.4	0	Similar coverage
Caldimonas	89.5	89.5	0	Similar coverage
FFCH7168	89.5	89.5	0	Similar coverage
Meinhardsimonia	89.5	89.5	0	Similar coverage
Orenia	89.5	89.5	0	Similar coverage
YC-ZSS-LKJ147	89.5	89.5	0	Similar coverage
Gracilibacillus	89.6	89.6	0	Similar coverage
A2	89.7	89.7	0	Similar coverage
Chryseomicrobium	89.7	89.7	0	Similar coverage
Acetanaerobacterium	90	90	0	Similar coverage
Actinopolymorpha	90	90	0	Similar coverage
Ahrensia	90	90	0	Similar coverage
Chelativorans	90	90	0	Similar coverage
Hyphobacterium	90	90	0	Similar coverage
Mailhella	90	90	0	Similar coverage
Microbacter	90	90	0	Similar coverage
Ornithinibacter	90	90	0	Similar coverage
Paucisalibacillus	90	90	0	Similar coverage
possible genus 04	90	90	0	Similar coverage
Pricia	90	90	0	Similar coverage
Procabacter	90	90	0	Similar coverage
Qinpengyuania	90	90	0	Similar coverage
UTCFX1	90.2	90.2	0	Similar coverage
SH3-11	90.3	90.3	0	Similar coverage
Anaerobranca	90.5	90.5	0	Similar coverage
Aquitalea	90.5	90.5	0	Similar coverage
pLW-20	90.5	90.5	0	Similar coverage
Rivularia PCC-7116	90.5	90.5	0	Similar coverage
Roseococcus	90.5	90.5	0	Similar coverage
Vampirovibrio	90.5	90.5	0	Similar coverage
Alkalicoccobacillus	90.9	90.9	0	Similar coverage
Aphanizomenon MDT14a	90.9	90.9	0	Similar coverage
Candidatus Finniella	90.9	90.9	0	Similar coverage
Croceicoccus	90.9	90.9	0	Similar coverage
Desulfofaba	90.9	90.9	0	Similar coverage
Donghicola	90.9	90.9	0	Similar coverage
Halothiobacillus	90.9	90.9	0	Similar coverage
Harryflintia	90.9	90.9	0	Similar coverage
Limimonas	90.9	90.9	0	Similar coverage
Microcella	90.9	90.9	0	Similar coverage
Nitrobacter	90.9	90.9	0	Similar coverage
Parapusillimonas	90.9	90.9	0	Similar coverage
Profundimonas	90.9	90.9	0	Similar coverage
Psychrobium	90.9	90.9	0	Similar coverage
SBYZ-1017	90.9	90.9	0	Similar coverage
Succinivibrionaceae UCG-002	90.9	90.9	0	Similar coverage
Thiomonas	90.9	90.9	0	Similar coverage
dgA-11 gut group	91.1	91.1	0	Similar coverage
Allorhizocola	91.3	91.3	0	Similar coverage
Archangium	91.3	91.3	0	Similar coverage
Blattabacterium	91.3	91.3	0	Similar coverage
Fructobacillus	91.3	91.3	0	Similar coverage
Thiopseudomonas	91.4	91.4	0	Similar coverage
Uliginosibacterium	91.4	91.4	0	Similar coverage
Succinivibrio	91.5	91.5	0	Similar coverage
Thermodesulfovibrio	91.5	91.5	0	Similar coverage
Actinosynnema	91.7	91.7	0	Similar coverage
Amphritea	91.7	91.7	0	Similar coverage
Caedibacter	91.7	91.7	0	Similar coverage
Calidithermus	91.7	91.7	0	Similar coverage
Desulfofrigus	91.7	91.7	0	Similar coverage
Edaphobaculum	91.7	91.7	0	Similar coverage
Halarsenatibacter	91.7	91.7	0	Similar coverage
Haliea	91.7	91.7	0	Similar coverage
Halocynthiibacter	91.7	91.7	0	Similar coverage
Hormoscilla SI04-45	91.7	91.7	0	Similar coverage
Jhaorihella	91.7	91.7	0	Similar coverage
Johnsonella	91.7	91.7	0	Similar coverage
Leucothrix	91.7	91.7	0	Similar coverage
Macrococcus	91.7	91.7	0	Similar coverage
Pedosphaera	91.7	91.7	0	Similar coverage
Pseudoprevotella	91.7	91.7	0	Similar coverage
Sphaerisporangium	91.7	91.7	0	Similar coverage
YC-ZSS-LKJ63	91.7	91.7	0	Similar coverage
Weizmannia	91.8	91.8	0	Similar coverage
Candidatus Aquiluna	92	92	0	Similar coverage
Rossellomorea	92.1	92.1	0	Similar coverage
LD29	92.2	92.2	0	Similar coverage
MSBL7	92.2	92.2	0	Similar coverage
Streptosporangium	92.2	92.2	0	Similar coverage
1959-1	92.3	92.3	0	Similar coverage
Clostridium aceticum group	92.3	92.3	0	Similar coverage
Filimonas	92.3	92.3	0	Similar coverage
Gibbsiella	92.3	92.3	0	Similar coverage
Lacrimispora	92.3	92.3	0	Similar coverage
Lutimaribacter	92.3	92.3	0	Similar coverage
Maridesulfovibrio	92.3	92.3	0	Similar coverage
Methyloglobulus	92.3	92.3	0	Similar coverage
Mucispirillum	92.3	92.3	0	Similar coverage
Oceanispirochaeta	92.3	92.3	0	Similar coverage
Oleispira	92.3	92.3	0	Similar coverage
Propionicimonas	92.3	92.3	0	Similar coverage
Pseudomethylobacillus	92.3	92.3	0	Similar coverage
RumEn M2	92.3	92.3	0	Similar coverage
Metabacillus	92.4	92.4	0	Similar coverage
Chujaibacter	92.5	92.5	0	Similar coverage
Thermincola	92.5	92.5	0	Similar coverage
Alkalihalobacillus	92.6	92.6	0	Similar coverage
AKYG587	92.9	92.9	0	Similar coverage
Algicola	92.9	92.9	0	Similar coverage
Alterococcus	92.9	92.9	0	Similar coverage
Chloroflexus	92.9	92.9	0	Similar coverage
Halobiforma	92.9	92.9	0	Similar coverage
Hydrogenophilus	92.9	92.9	0	Similar coverage
Litorimicrobium	92.9	92.9	0	Similar coverage
Methyloparacoccus	92.9	92.9	0	Similar coverage
Panacagrimonas	92.9	92.9	0	Similar coverage
Prolixibacter	92.9	92.9	0	Similar coverage
Pseudoclostridium	92.9	92.9	0	Similar coverage
Roseospira	92.9	92.9	0	Similar coverage
Salinivibrio	92.9	92.9	0	Similar coverage
Schleiferilactobacillus	92.9	92.9	0	Similar coverage
Ureibacillus	92.9	92.9	0	Similar coverage
Wukongibacter	92.9	92.9	0	Similar coverage
Zhongshania	92.9	92.9	0	Similar coverage
Paraprevotella	93	93	0	Similar coverage
Haloferula	93.1	93.1	0	Similar coverage
Humidesulfovibrio	93.1	93.1	0	Similar coverage
Luminiphilus	93.1	93.1	0	Similar coverage
Brachymonas	93.2	93.2	0	Similar coverage
CAG-196	93.2	93.2	0	Similar coverage
Pir4 lineage	93.2	93.2	0	Similar coverage
Acetoanaerobium	93.3	93.3	0	Similar coverage
Aurantimonas	93.3	93.3	0	Similar coverage
CAG-56	93.3	93.3	0	Similar coverage
Desulfoconvexum	93.3	93.3	0	Similar coverage
Flavirhabdus	93.3	93.3	0	Similar coverage
Howardella	93.3	93.3	0	Similar coverage
Lachnospiraceae FE2018 group	93.3	93.3	0	Similar coverage
Lactivibrio	93.3	93.3	0	Similar coverage
Leeia	93.3	93.3	0	Similar coverage
Longimicrobium	93.3	93.3	0	Similar coverage
Pleomorphomonas	93.3	93.3	0	Similar coverage
Reinekea	93.3	93.3	0	Similar coverage
Serpentinicella	93.3	93.3	0	Similar coverage
Sunxiuqinia	93.3	93.3	0	Similar coverage
Terasakiella	93.3	93.3	0	Similar coverage
Cetobacterium	93.4	93.4	0	Similar coverage
Sneathiella	93.5	93.5	0	Similar coverage
Amylibacter	93.7	93.7	0	Similar coverage
Candidatus Jettenia	93.8	93.8	0	Similar coverage
Croceitalea	93.8	93.8	0	Similar coverage
Halorubellus	93.8	93.8	0	Similar coverage
Mycetocola	93.8	93.8	0	Similar coverage
OM75 clade	93.8	93.8	0	Similar coverage
Persephonella	93.8	93.8	0	Similar coverage
Sulfitobacter	93.8	93.8	0	Similar coverage
Zunongwangia	93.8	93.8	0	Similar coverage
OM43 clade	93.9	93.9	0	Similar coverage
Planococcus	93.9	93.9	0	Similar coverage
Romboutsia	93.9	93.9	0	Similar coverage
Cryomorpha	94	94	0	Similar coverage
Aeribacillus	94.1	94.1	0	Similar coverage
Aestuariicella	94.1	94.1	0	Similar coverage
Aliikangiella	94.1	94.1	0	Similar coverage
Alkalibacillus	94.1	94.1	0	Similar coverage
Asaia	94.1	94.1	0	Similar coverage
Commensalibacter	94.1	94.1	0	Similar coverage
Cylindrospermopsis CRJ1	94.1	94.1	0	Similar coverage
Erysipelotrichaceae UCG-006	94.1	94.1	0	Similar coverage
Geminocystis PCC-6308	94.1	94.1	0	Similar coverage
Phormidium IAM M-71	94.1	94.1	0	Similar coverage
Portibacter	94.1	94.1	0	Similar coverage
Pseudochelatococcus	94.1	94.1	0	Similar coverage
Tardiphaga	94.1	94.1	0	Similar coverage
Taylorella	94.1	94.1	0	Similar coverage
Thalassiella	94.1	94.1	0	Similar coverage
Comamonas	94.2	94.2	0	Similar coverage
Aliidiomarina	94.3	94.3	0	Similar coverage
Alkaliphilus	94.3	94.3	0	Similar coverage
Pediococcus	94.3	94.3	0	Similar coverage
Anabaena	94.4	94.4	0	Similar coverage
Candidatus Thiodiazotropha	94.4	94.4	0	Similar coverage
Filomicrobium	94.4	94.4	0	Similar coverage
Flammeovirga	94.4	94.4	0	Similar coverage
Glaciecola	94.4	94.4	0	Similar coverage
Hypnocyclicus	94.4	94.4	0	Similar coverage
Mastigocladopsis PCC-10914	94.4	94.4	0	Similar coverage
Methylococcus	94.4	94.4	0	Similar coverage
Neptunomonas	94.4	94.4	0	Similar coverage
Populibacterium	94.4	94.4	0	Similar coverage
Salinispora	94.4	94.4	0	Similar coverage
Sideroxydans	94.4	94.4	0	Similar coverage
Syntrophococcus	94.4	94.4	0	Similar coverage
wb1-P19	94.4	94.4	0	Similar coverage
Xenococcus PCC-7305	94.4	94.4	0	Similar coverage
Desulfobacca	94.6	94.6	0	Similar coverage
Thiohalophilus	94.6	94.6	0	Similar coverage
[Eubacterium] ventriosum group	94.7	94.7	0	Similar coverage
Alteribacillus	94.7	94.7	0	Similar coverage
Flaviaestuariibacter	94.7	94.7	0	Similar coverage
Flavimobilis	94.7	94.7	0	Similar coverage
Holophaga	94.7	94.7	0	Similar coverage
Leadbetterella	94.7	94.7	0	Similar coverage
Luteitalea	94.7	94.7	0	Similar coverage
Maritimibacter	94.7	94.7	0	Similar coverage
Phycisphaera	94.7	94.7	0	Similar coverage
Plantibacter	94.7	94.7	0	Similar coverage
Saccharicrinis	94.7	94.7	0	Similar coverage
Thermobifida	94.7	94.7	0	Similar coverage
U29-B03	94.7	94.7	0	Similar coverage
Zobellella	94.7	94.7	0	Similar coverage
Zobellia	94.7	94.7	0	Similar coverage
Erysipelotrichaceae UCG-003	94.9	94.9	0	Similar coverage
IheB3-7	94.9	94.9	0	Similar coverage
Parasphingorhabdus	94.9	94.9	0	Similar coverage
Aquirhabdus	95	95	0	Similar coverage
Cystobacter	95	95	0	Similar coverage
Halorhabdus	95	95	0	Similar coverage
Imperialibacter	95	95	0	Similar coverage
Kyrpidia	95	95	0	Similar coverage
Lachnospiraceae UCG-010	95	95	0	Similar coverage
Nevskia	95	95	0	Similar coverage
Oryzihumus	95	95	0	Similar coverage
Oxalicibacterium	95	95	0	Similar coverage
Paenalcaligenes	95	95	0	Similar coverage
Parafilimonas	95	95	0	Similar coverage
SBYC	95	95	0	Similar coverage
Sediminimonas	95	95	0	Similar coverage
Sulfuritalea	95	95	0	Similar coverage
TG3	95	95	0	Similar coverage
Dyella	95.1	95.1	0	Similar coverage
Lentimicrobium	95.1	95.1	0	Similar coverage
Noviherbaspirillum	95.1	95.1	0	Similar coverage
Thioalkalivibrio	95.1	95.1	0	Similar coverage
Acidipropionibacterium	95.2	95.2	0	Similar coverage
Allochromatium	95.2	95.2	0	Similar coverage
Anaeromusa-Anaeroarcus	95.2	95.2	0	Similar coverage
Candidatus Baumannia	95.2	95.2	0	Similar coverage
Candidatus Liberibacter	95.2	95.2	0	Similar coverage
Fulvivirga	95.2	95.2	0	Similar coverage
Lentimonas	95.2	95.2	0	Similar coverage
Longispora	95.2	95.2	0	Similar coverage
Methyloversatilis	95.2	95.2	0	Similar coverage
Nibribacter	95.2	95.2	0	Similar coverage
Rhodovastum	95.2	95.2	0	Similar coverage
Cellulophaga	95.3	95.3	0	Similar coverage
Rhodomicrobium	95.3	95.3	0	Similar coverage
Phenylobacterium	95.4	95.4	0	Similar coverage
Aminobacterium	95.5	95.5	0	Similar coverage
Anderseniella	95.5	95.5	0	Similar coverage
Arenicella	95.5	95.5	0	Similar coverage
Dermacoccus	95.5	95.5	0	Similar coverage
Desulfotignum	95.5	95.5	0	Similar coverage
Halofilum	95.5	95.5	0	Similar coverage
Intrasporangium	95.5	95.5	0	Similar coverage
Kluyvera	95.5	95.5	0	Similar coverage
Moritella	95.5	95.5	0	Similar coverage
Pelotomaculum	95.5	95.5	0	Similar coverage
Piscinibacter	95.5	95.5	0	Similar coverage
Terribacillus	95.5	95.5	0	Similar coverage
Thiofaba	95.5	95.5	0	Similar coverage
Zag_111	95.5	95.5	0	Similar coverage
Zeaxanthinibacter	95.5	95.5	0	Similar coverage
Abditibacterium	95.7	95.7	0	Similar coverage
Algibacter	95.7	95.7	0	Similar coverage
Anaerolineaceae UCG-001	95.7	95.7	0	Similar coverage
Borrelia	95.7	95.7	0	Similar coverage
Candidatus Nitrotoga	95.7	95.7	0	Similar coverage
CL500-3	95.7	95.7	0	Similar coverage
IMCC26134	95.7	95.7	0	Similar coverage
Lachnospiraceae UCG-002	95.7	95.7	0	Similar coverage
mle1-7	95.7	95.7	0	Similar coverage
Natrialba	95.7	95.7	0	Similar coverage
Pedomicrobium	95.7	95.7	0	Similar coverage
Rugosibacter	95.7	95.7	0	Similar coverage
Streptomonospora	95.7	95.7	0	Similar coverage
Vagococcus	95.7	95.7	0	Similar coverage
[Eubacterium] sulci group	95.8	95.8	0	Similar coverage
Aureibaculum	95.8	95.8	0	Similar coverage
Bythopirellula	95.8	95.8	0	Similar coverage
DEV008	95.8	95.8	0	Similar coverage
Halorhodospira	95.8	95.8	0	Similar coverage
Ilumatobacter	95.8	95.8	0	Similar coverage
Nostoc PCC-7107	95.8	95.8	0	Similar coverage
Oleibacter	95.8	95.8	0	Similar coverage
Pseudorhodoferax	95.8	95.8	0	Similar coverage
Sphaerochaeta	95.8	95.8	0	Similar coverage
Tahibacter	95.8	95.8	0	Similar coverage
Thermocrinis	95.8	95.8	0	Similar coverage
Wenzhouxiangella	95.8	95.8	0	Similar coverage
Parabacteroides	95.9	95.9	0	Similar coverage
Parvibaculum	95.9	95.9	0	Similar coverage
Candidatus Udaeobacter	96	96	0	Similar coverage
Microlunatus	96	96	0	Similar coverage
Planktotalea	96	96	0	Similar coverage
Pseudodesulfovibrio	96	96	0	Similar coverage
Sphingoaurantiacus	96	96	0	Similar coverage
Carboxylicivirga	96.1	96.1	0	Similar coverage
Pseudaminobacter	96.1	96.1	0	Similar coverage
Candidatus Riegeria	96.2	96.2	0	Similar coverage
Deferrisoma	96.2	96.2	0	Similar coverage
Dehalobacter	96.2	96.2	0	Similar coverage
Marinospirillum	96.2	96.2	0	Similar coverage
Rhodoplanes	96.2	96.2	0	Similar coverage
Rubinisphaera	96.2	96.2	0	Similar coverage
Terrimonas	96.2	96.2	0	Similar coverage
Wilmottia Ant-Ph58	96.2	96.2	0	Similar coverage
Arcticibacter	96.3	96.3	0	Similar coverage
Caminibacter	96.3	96.3	0	Similar coverage
Candidatus Alysiosphaera	96.3	96.3	0	Similar coverage
Ectobacillus	96.3	96.3	0	Similar coverage
Fermentimonas	96.3	96.3	0	Similar coverage
Hoeflea	96.3	96.3	0	Similar coverage
Litorivicinus	96.3	96.3	0	Similar coverage
oc32	96.3	96.3	0	Similar coverage
Pontibacillus	96.3	96.3	0	Similar coverage
Puteibacter	96.3	96.3	0	Similar coverage
Roseobacter clade CHAB-I-5 lineage	96.3	96.3	0	Similar coverage
Sulfurihydrogenibium	96.3	96.3	0	Similar coverage
Tropicimonas-Psychromarinibacter	96.3	96.3	0	Similar coverage
Aequorivita	96.4	96.4	0	Similar coverage
Aminicella	96.4	96.4	0	Similar coverage
Bryocella	96.4	96.4	0	Similar coverage
Cycloclasticus	96.4	96.4	0	Similar coverage
Falsirhodobacter	96.4	96.4	0	Similar coverage
Methylocystis	96.4	96.4	0	Similar coverage
Moryella	96.4	96.4	0	Similar coverage
Planktomarina	96.4	96.4	0	Similar coverage
Rhodobaculum	96.4	96.4	0	Similar coverage
Saccharedens	96.4	96.4	0	Similar coverage
SEEP-SRB1	96.4	96.4	0	Similar coverage
Herminiimonas	96.6	96.6	0	Similar coverage
Smithella	96.6	96.6	0	Similar coverage
Verruc-01	96.6	96.6	0	Similar coverage
ASF356	96.7	96.7	0	Similar coverage
Bhargavaea	96.7	96.7	0	Similar coverage
Candidatus Accumulibacter	96.7	96.7	0	Similar coverage
Candidatus Cloacimonas	96.7	96.7	0	Similar coverage
Dethiobacter	96.7	96.7	0	Similar coverage
Hirschia	96.7	96.7	0	Similar coverage
Planctobacterium	96.7	96.7	0	Similar coverage
Prosthecobacter	96.7	96.7	0	Similar coverage
Simplicispira	96.7	96.7	0	Similar coverage
Trueperella	96.7	96.7	0	Similar coverage
C39	96.8	96.8	0	Similar coverage
Desulfuromusa	96.8	96.8	0	Similar coverage
Fournierella	96.8	96.8	0	Similar coverage
Fructilactobacillus	96.8	96.8	0	Similar coverage
Herbinix	96.8	96.8	0	Similar coverage
Jatrophihabitans	96.8	96.8	0	Similar coverage
Paeniglutamicibacter	96.8	96.8	0	Similar coverage
Proteiniclasticum	96.8	96.8	0	Similar coverage
Rhizobium	96.8	96.8	0	Similar coverage
SM23-31	96.8	96.8	0	Similar coverage
Archaeoglobus	96.9	96.9	0	Similar coverage
Haladaptatus	96.9	96.9	0	Similar coverage
Histophilus	96.9	96.9	0	Similar coverage
Latilactobacillus	96.9	96.9	0	Similar coverage
Meiothermus	96.9	96.9	0	Similar coverage
Oleiphilus	96.9	96.9	0	Similar coverage
Persicirhabdus	96.9	96.9	0	Similar coverage
Pyrobaculum	96.9	96.9	0	Similar coverage
Rubritalea	96.9	96.9	0	Similar coverage
Shinella	96.9	96.9	0	Similar coverage
Acetomicrobium	97	97	0	Similar coverage
Aquihabitans	97	97	0	Similar coverage
Candidatus Xiphinematobacter	97	97	0	Similar coverage
Defluviitalea	97	97	0	Similar coverage
Ferribacterium	97	97	0	Similar coverage
HSB OF53-F07	97	97	0	Similar coverage
Limnothrix	97	97	0	Similar coverage
Myxococcus	97	97	0	Similar coverage
P3OB-42	97	97	0	Similar coverage
Paraglaciecola	97	97	0	Similar coverage
Aerophobus	97.1	97.1	0	Similar coverage
Chlorobium	97.1	97.1	0	Similar coverage
Desulfofustis	97.1	97.1	0	Similar coverage
Ferdinandcohnia	97.1	97.1	0	Similar coverage
Gallibacterium	97.1	97.1	0	Similar coverage
Isoptericola	97.1	97.1	0	Similar coverage
Leptolyngbya PCC-6306	97.1	97.1	0	Similar coverage
Luedemannella	97.1	97.1	0	Similar coverage
Mesotoga	97.1	97.1	0	Similar coverage
Pseudolysobacter	97.1	97.1	0	Similar coverage
Riemerella	97.1	97.1	0	Similar coverage
Roseibacterium	97.1	97.1	0	Similar coverage
Stenotrophobacter	97.1	97.1	0	Similar coverage
MSBL3	97.2	97.2	0	Similar coverage
Pseudorhodoplanes	97.2	97.2	0	Similar coverage
Solidesulfovibrio	97.2	97.2	0	Similar coverage
[Eubacterium] brachy group	97.3	97.3	0	Similar coverage
Aliterella	97.3	97.3	0	Similar coverage
Anaeromyxobacter	97.3	97.3	0	Similar coverage
Brachybacterium	97.3	97.3	0	Similar coverage
Candidatus Ovatusbacter	97.3	97.3	0	Similar coverage
Dubosiella	97.3	97.3	0	Similar coverage
hgcI clade	97.3	97.3	0	Similar coverage
Scytonema UTEX 2349	97.3	97.3	0	Similar coverage
Chlorobaculum	97.4	97.4	0	Similar coverage
Cronobacter	97.4	97.4	0	Similar coverage
DMER64	97.4	97.4	0	Similar coverage
Parafrigoribacterium	97.4	97.4	0	Similar coverage
Rhodopseudomonas	97.4	97.4	0	Similar coverage
Roseivirga	97.4	97.4	0	Similar coverage
Tetragenococcus	97.4	97.4	0	Similar coverage
Desulfitobacterium	97.5	97.5	0	Similar coverage
Hafnia-Obesumbacterium	97.5	97.5	0	Similar coverage
MB11C04 marine group	97.5	97.5	0	Similar coverage
Rhodanobacter	97.5	97.5	0	Similar coverage
Salinimicrobium	97.5	97.5	0	Similar coverage
Blastopirellula	97.6	97.6	0	Similar coverage
Cerasicoccus	97.6	97.6	0	Similar coverage
Conchiformibius	97.6	97.6	0	Similar coverage
Desulfitibacter	97.6	97.6	0	Similar coverage
Enterovirga	97.6	97.6	0	Similar coverage
Haloterrigena	97.6	97.6	0	Similar coverage
Immundisolibacter	97.6	97.6	0	Similar coverage
Leptolyngbya ANT.L52.2	97.6	97.6	0	Similar coverage
Oceanisphaera	97.6	97.6	0	Similar coverage
Pseudazoarcus	97.6	97.6	0	Similar coverage
Rickettsiella	97.6	97.6	0	Similar coverage
Actinoallomurus	97.7	97.7	0	Similar coverage
Afipia	97.7	97.7	0	Similar coverage
Anaerorhabdus	97.7	97.7	0	Similar coverage
BD1-7 clade	97.7	97.7	0	Similar coverage
Gramella	97.7	97.7	0	Similar coverage
Hyphomicrobium	97.7	97.7	0	Similar coverage
Nodosilinea PCC-7104	97.7	97.7	0	Similar coverage
OM27 clade	97.7	97.7	0	Similar coverage
ANME-3	97.8	97.8	0	Similar coverage
Gallionella	97.8	97.8	0	Similar coverage
Loktanella	97.8	97.8	0	Similar coverage
Sandaracinus	97.8	97.8	0	Similar coverage
Ascidiaceihabitans	97.9	97.9	0	Similar coverage
Defluviimonas	97.9	97.9	0	Similar coverage
Dokdonella	97.9	97.9	0	Similar coverage
F0058	97.9	97.9	0	Similar coverage
Fervidobacterium	97.9	97.9	0	Similar coverage
Magnetococcus	97.9	97.9	0	Similar coverage
Pelolinea	97.9	97.9	0	Similar coverage
[truncated: 2,256 more rows]
