# Supplementary material
Source: Research Square preprint supplement (doi:10.21203/rs.3.rs-8280185/v1)
Supplement: Supplementary file 3 [file 40e7147538b7f0bf544bcb9a.xlsx]

## Sheet: meta_data_Hconc
Sample	sample-id	Mapping_file	CK_ID	Experiment	Time	Specifying	Replicate	Treatment_Names	H1	H2	H3	H4	H5	H6	H7	H8	H9	H10	H11	H12	H13	H14	H15	H16	H17	H18	H19	H20	H21	H22	H23	H24	H25	H26	H27
S03	EE_T2_1_1	180226_M01270_0436_000000000-BL376_1_11226GT0003L01	S03	EE	T2	SW	1	Sw	0	0	0	0	0	0	0	0	0	0	0	0	0	0	0	0	0	0	0	0	0	0	0	0	0	0	0
S11	EE_T2_1_2	180226_M01270_0436_000000000-BL376_1_11226GT0011L01	S11	EE	T2	SW	2	Sw	0	0	0	0	0	0	0	0	0	0	0	0	0	0	0	0	0	0	0	0	0	0	0	0	0	0	0
S68	EE_T4_1_1	180226_M01270_0436_000000000-BL376_1_11226GT0068L01	S68	EE	T4	SW	1	Sw	38.47	0	0	0	9.19	11.7	11.7	0	0	0	31.77	190.43	190.43	185.78	185.78	307.19	9.26	115.6	0	252.03	252.03	252.03	136.19	136.19	53.96	53.96	79.11
S76	EE_T4_1_2	180226_M01270_0436_000000000-BL376_1_11226GT0076L01	S76	EE	T4	SW	2	Sw	0	0	0	0	0	0	0	0	0	0	0	0	0	0	0	0	0	0	0	0	0	0	0	0	0	0	0
S46	EE_T6_1_1	180226_M01270_0436_000000000-BL376_1_11226GT0046L01	S46	EE	T6	SW	1	Sw	0	0	0	0	0	0	0	0	0	0	0	0	0	0	0	0	0	0	0	0	0	0	0	0	0	0	0
S54	EE_T6_1_2	180226_M01270_0436_000000000-BL376_1_11226GT0054L01	S54	EE	T6	SW	2	Sw	0	0	0	0	0	0	0	0	0	0	0	0	0	0	0	0	0	0	0	0	0	0	0	0	0	0	0
S35	EE_T2_3_1	180226_M01270_0436_000000000-BL376_1_11226GT0035L01	S35	EE	T2	SW+ Disp1	1	Sw+Dsew	0	0	0	0	0	0	0	0	0	0	0	0	0	0	0	0	0	0	0	0	0	0	0	0	0	0	0
S05	EE_T4_3_1	180226_M01270_0436_000000000-BL376_1_11226GT0005L01	S05	EE	T4	SW+ Disp1	1	Sw+Dsew	0	0	0	6.8	0	0	0	0	0	0	0	0	0	0	0	0	0	0	0	0	0	0	0	0	0	0	0
S13	EE_T4_3_2	180226_M01270_0436_000000000-BL376_1_11226GT0013L01	S13	EE	T4	SW+ Disp1	2	Sw+Dsew	21.91	0	0	30.7	0	0	0	0	0	0	67.08	27.75	36.97	38.68	38.68	62.58	24.6	24.6	0	79.45	79.45	79.45	46.65	46.65	53.44	53.44	53.44
S78	EE_T6_3_1	180226_M01270_0436_000000000-BL376_1_11226GT0078L01	S78	EE	T6	SW+ Disp1	1	Sw+Dsew	0	0	0	0	0	0	0	0	0	0	0	0	0	0	0	0	0	0	0	0	0	0	0	0	0	0	0
S86	EE_T6_3_2	180226_M01270_0436_000000000-BL376_1_11226GT0086L01	S86	EE	T6	SW+ Disp1	2	Sw+Dsew	0	0	0	15.94	0	0	0	0	0	0	0	0	0	0	0	0	0	0	0	0	0	0	0	0	0	0	0
S59	EE_T2_5_1	180226_M01270_0436_000000000-BL376_1_11226GT0059L01	S59	EE	T2	SW+N+Disp1	1	Sw+Dsew+N	0	0	0	0	0	0	0	0	0	0	0	0	0	0	0	0	0	0	0	0	0	0	0	0	0	0	0
S67	EE_T2_5_2	180226_M01270_0436_000000000-BL376_1_11226GT0067L01	S67	EE	T2	SW+N+Disp1	2	Sw+Dsew+N	0	0	0	0	0	0	0	0	0	0	0	0	0	0	0	0	0	0	0	0	0	0	0	0	0	0	0
S37	EE_T4_5_1	180226_M01270_0436_000000000-BL376_1_11226GT0037L01	S37	EE	T4	SW+N+Disp1	1	Sw+Dsew+N	679.31	252.67	0	0	143.85	143.85	73.11	128.12	44.04	44.04	658.5	1252.78	1700.8	1348.49	863.21	1390.94	164.02	565.35	0	528.38	341.7	2893.88	1794.53	1794.53	914.95	1149.34	586.5
S15	EE_T6_5_1	180226_M01270_0436_000000000-BL376_1_11226GT0015L01	S15	EE	T6	SW+N+Disp1	1	Sw+Dsew+N	0	0	0	0	0	0	0	0	0	0	0	0	0	0	0	0	0	0	50.01	0	0	0	0	0	0	0	0
S23	EE_T6_5_2	180226_M01270_0436_000000000-BL376_1_11226GT0023L01	S23	EE	T6	SW+N+Disp1	2	Sw+Dsew+N	0	0	0	45.85	0	0	0	0	0	0	0	0	0	0	0	0	0	0	0	0	0	0	0	0	0	0	0
S43	EE_T2_4_1	180226_M01270_0436_000000000-BL376_1_11226GT0043L01	S43	EE	T2	SW+Disp2	1	Sw+Dsns	0	0	0	0	0	0	0	0	0	0	0	0	0	0	0	0	0	0	0	0	0	0	0	0	0	0	0
S51	EE_T2_4_2	180226_M01270_0436_000000000-BL376_1_11226GT0051L01	S51	EE	T2	SW+Disp2	2	Sw+Dsns	0	0	0	0	0	0	0	0	0	0	0	0	0	0	0	0	0	0	0	0	0	0	0	0	0	0	0
S21	EE_T4_4_1	180226_M01270_0436_000000000-BL376_1_11226GT0021L01	S21	EE	T4	SW+Disp2	1	Sw+Dsns	0	0	0	0	0	0	0	0	0	0	0	0	0	0	0	0	0	0	0	0	0	0	0	0	0	0	0
S29	EE_T4_4_2	180226_M01270_0436_000000000-BL376_1_11226GT0029L01	S29	EE	T4	SW+Disp2	2	Sw+Dsns	64.82	64.82	0	0	0	0	0	0	0	0	0	0	0	0	0	0	0	100.52	6598.72	0	0	0	0	0	0	0	0
S07	EE_T6_4_2	180226_M01270_0436_000000000-BL376_1_11226GT0007L01	S07	EE	T6	SW+Disp2	2	Sw+Dsns	0	0	0	0	0	0	0	0	0	0	0	0	0	0	0	0	0	0	34.83	0	0	0	0	0	0	0	0
S94	EE_T6_4_1	180226_M01270_0436_000000000-BL376_1_11226GT0094L01	S94	EE	T6	SW+Disp2	1	Sw+Dsns	0	0	0	0	76.19	0	0	0	0	0	0	0	0	0	0	0	0	0	0	0	0	0	0	0	0	0	0
S75	EE_T2_6_1	180226_M01270_0436_000000000-BL376_1_11226GT0075L01	S75	EE	T2	SW+N+Disp2	1	Sw+Dsns+N	0	0	0	0	0	0	0	0	0	0	0	0	0	0	0	0	0	0	3842.53	0	0	0	0	0	0	0	0
S83	EE_T2_6_2	180226_M01270_0436_000000000-BL376_1_11226GT0083L01	S83	EE	T2	SW+N+Disp2	2	Sw+Dsns+N	0	0	0	0	0	0	0	0	0	0	0	0	0	0	0	0	0	0	3842.53	0	0	0	0	0	0	0	0
S45	EE_T4_6_1	180226_M01270_0436_000000000-BL376_1_11226GT0045L01	S45	EE	T4	SW+N+Disp2	1	Sw+Dsns+N	0	0	0	47.91	0	0	0	0	0	0	0	0	0	0	0	0	0	0	0	0	0	0	0	0	0	0	0
S31	EE_T6_6_1	180226_M01270_0436_000000000-BL376_1_11226GT0031L01	S31	EE	T6	SW+N+Disp2	1	Sw+Dsns+N	0	0	0	86.62	0	0	0	0	0	0	0	0	0	0	0	0	0	0	0	0	0	0	0	0	0	0	0
S39	EE_T6_6_2	180226_M01270_0436_000000000-BL376_1_11226GT0039L01	S39	EE	T6	SW+N+Disp2	2	Sw+Dsns+N	0	0	0	86.62	0	0	0	0	0	0	0	0	0	0	0	0	0	0	0	0	0	0	0	0	0	0	0
S19	EE_T2_2_1	180226_M01270_0436_000000000-BL376_1_11226GT0019L01	S19	EE	T2	SW+N	1	Sw+N	0	0	0	0	0	0	0	0	0	0	0	0	0	0	0	0	0	0	366.31	0	0	0	0	0	0	0	0
S27	EE_T2_2_2	180226_M01270_0436_000000000-BL376_1_11226GT0027L01	S27	EE	T2	SW+N	2	Sw+N	0	0	0	0	0	0	0	0	0	0	0	0	0	0	0	0	0	0	164.99	0	0	0	0	0	0	0	0
S84	EE_T4_2_1	180226_M01270_0436_000000000-BL376_1_11226GT0084L01	S84	EE	T4	SW+N	1	Sw+N	0	0	0	24.55	0	0	0	0	0	0	0	0	0	0	0	0	0	0	0	0	0	0	0	0	0	0	0
S92	EE_T4_2_2	180226_M01270_0436_000000000-BL376_1_11226GT0092L01	S92	EE	T4	SW+N	2	Sw+N	0	0	0	0	0	0	0	0	0	0	0	0	0	0	0	0	0	0	5348.27	0	0	0	0	0	0	0	0
S62	EE_T6_2_1	180226_M01270_0436_000000000-BL376_1_11226GT0062L01	S62	EE	T6	SW+N	1	Sw+N	0	0	0	0	0	0	0	0	0	0	0	0	0	0	0	0	0	0	0	0	0	0	0	0	0	0	0
S70	EE_T6_2_2	180226_M01270_0436_000000000-BL376_1_11226GT0070L01	S70	EE	T6	SW+N	2	Sw+N	0	0	0	0	0	0	0	0	0	0	0	0	0	0	0	0	0	0	0	0	0	0	0	0	0	0	0
S24	EE_T6_11_2	180226_M01270_0436_000000000-BL376_1_11226GT0024L01	S24	EE	T2	SW+O	2	Sw+O	1394.46	482.22	138.64	145.03	29.39	257.49	187.88	212.09	30.46	30.46	1802.21	3467.56	3467.56	1821.14	1821.14	3074.53	357.23	1332.79	0	441.52	441.52	6840.91	4329.58	4329.58	1984.28	1984.28	1164.86
S36	EE_T2_11_1	180226_M01270_0436_000000000-BL376_1_11226GT0036L01	S36	EE	T2	SW+O	1	Sw+O	1394.46	482.22	138.64	145.03	29.39	257.49	187.88	212.09	30.46	30.46	1802.21	3467.56	3467.56	1821.14	1821.14	3074.53	357.23	1332.79	0	441.52	441.52	6840.91	4329.58	4329.58	1984.28	1984.28	1164.86
S44	EE_T2_11_2	180226_M01270_0436_000000000-BL376_1_11226GT0044L01	S44	EE	T2	SW+O	2	Sw+O	0	0	0	0	0	0	0	0	0	0	0	48.57	106.16	158.06	158.06	116	116	0	0	0	0	87.02	131.07	131.07	0	0	0
S14	EE_T4_11_1	180226_M01270_0436_000000000-BL376_1_11226GT0014L01	S14	EE	T4	SW+O	1	Sw+O	14674.4	4208.01	504.36	532.36	568.57	1358.06	920.93	801.68	1047.65	301.47	10758.1	12235	15440.2	13623.5	7666.16	14172.8	1387.28	5838.78	730.65	7923.63	36593.8	39300.2	39300.2	39300.2	39300.2	7841.93	6470.09
S22	EE_T4_11_2	180226_M01270_0436_000000000-BL376_1_11226GT0022L01	S22	EE	T4	SW+O	2	Sw+O	448.66	153.17	0	0	68.77	68.77	68.77	0	0	0	176.37	645.29	873.08	675.68	447.12	436.86	41.47	307.38	0	244.98	197.93	1429.33	1663.02	976.06	327.83	620.07	307.17
S16	EE_T6_11_1	180226_M01270_0436_000000000-BL376_1_11226GT0016L01	S16	EE	T6	SW+O	1	Sw+O	895.52	232.04	129.06	137.24	84.16	194.11	129.82	188.62	160.51	160.51	3464.31	1927.62	2500.59	2180.39	2180.39	3585.57	280.28	1323.46	0	215.54	99.6	4101.86	2179.55	2179.55	2046.96	759.99	980.19
S91	EE_T2_7_1	180226_M01270_0436_000000000-BL376_1_11226GT0091L01	S91	EE	T2	SW+O+Disp1	1	Sw+O+Dsew	0	0	0	0	0	0	0	0	0	0	0	0	0	0	0	0	0	0	0	0	0	0	0	0	0	0	0
S53	EE_T4_7_1	180226_M01270_0436_000000000-BL376_1_11226GT0053L01	S53	EE	T4	SW+O+Disp1	1	Sw+O+Dsew	4925.05	1351.33	192.82	212.1	176.84	378.69	310.85	326.91	307.61	307.61	4926.44	4897.89	6270.2	3509.81	3509.81	5967.82	80.78	2329.59	472.04	1816.48	780.84	14895.9	8370.55	8370.55	2980.13	2980.13	2749.76
S61	EE_T4_7_2	180226_M01270_0436_000000000-BL376_1_11226GT0061L01	S61	EE	T4	SW+O+Disp1	2	Sw+O+Dsew	33150.3	9140.3	866.61	895.1	849.09	2060.27	1406.85	1488.13	1801.7	373.4	23221.8	24886.2	31514.8	17509.3	17509.3	29738.1	475.23	11675.5	3385.21	14340.5	5900.58	84100.3	84532.8	46266.3	17473.2	17473.2	14602.3
S47	EE_T6_7_1	180226_M01270_0436_000000000-BL376_1_11226GT0047L01	S47	EE	T6	SW+O+Disp1	1	Sw+O+Dsew	985.19	274.12	169.47	194.44	120.21	279.46	180.86	198.84	227.37	227.37	4638.55	2102.37	2732.26	2639.55	2639.55	4241.42	313.55	1544.72	0	281.1	134.12	4422.44	2350.72	2350.72	847.93	847.93	1127.28
S55	EE_T6_7_2	180226_M01270_0436_000000000-BL376_1_11226GT0055L01	S55	EE	T6	SW+O+Disp1	2	Sw+O+Dsew	33150.3	9140.3	866.61	895.1	849.09	2060.27	1406.85	1488.13	1801.7	373.4	23221.8	24886.2	31514.8	17509.3	17509.3	29738.1	475.23	11675.5	3385.21	14340.5	5900.58	84100.3	84532.8	46266.3	17473.2	17473.2	14602.3
S12	EE_T2_9_1	180226_M01270_0436_000000000-BL376_1_11226GT0012L01	S12	EE	T2	CEWAF+N+Disp1	1	Sw+O+Dsew+N	56.22	5104.31	624.47	681.32	744.22	1603.19	1204.09	420.72	1340.05	145.96	13198.8	19174	812.88	10647.5	10647.5	17958.1	1712.43	7533.42	0	4146.91	44528	44528	22829.9	22829.9	10019.1	10019.1	7931.5
S85	EE_T4_9_1	180226_M01270_0436_000000000-BL376_1_11226GT0085L01	S85	EE	T4	CEWAF+N+Disp1	1	Sw+O+Dsew+N	10261.6	2972.85	344.39	391.25	367.35	875.33	729.96	514.37	635.62	44.19	7433.62	8758.74	10996.6	9280.15	5980.73	10288.9	986.81	4196.54	0	2318.98	2318.98	25541.9	26945.7	13918.8	9863.68	5714.79	4607.87
S79	EE_T6_9_1	180226_M01270_0436_000000000-BL376_1_11226GT0079L01	S79	EE	T6	CEWAF+N+Disp1	1	Sw+O+Dsew+N	0	0	0	0	0	0	0	0	0	0	0	0	0	0	0	0	0	0	50.01	0	0	0	0	0	0	0	0
S87	EE_T6_9_2	180226_M01270_0436_000000000-BL376_1_11226GT0087L01	S87	EE	T6	CEWAF+N+Disp1	2	Sw+O+Dsew+N	901.3	248.9	186.8	133.69	204.67	204.67	37.45	156.25	200.85	200.85	3178.85	1803.49	2342.11	1923.01	1923.01	3156.64	257.66	1189.2	0	291.54	44.94	4093.43	2236.35	2236.35	829.02	829.02	920.77
S04	EE_T2_8_1	180226_M01270_0436_000000000-BL376_1_11226GT0004L01	S04	EE	T2	SW+O+Disp2	2	Sw+O+Dsns	15795	4622.09	494.28	568.6	534.31	1221.22	852.61	725.57	927.04	113.43	10726.3	16975.5	16975.5	9268.01	9268.01	16060.7	324.34	6228.83	2342.45	3824.48	3824.48	40549.2	22043.4	22043.4	8941.01	8941.01	7082.15
S69	EE_T4_8_1	180226_M01270_0436_000000000-BL376_1_11226GT0069L01	S69	EE	T4	SW+O+Disp2	1	Sw+O+Dsns	2249.57	709.27	164.45	114.99	23.75	215.47	143.64	185.71	152.06	152.06	1874.31	2524.49	3167.59	2660.69	1748.28	3055.48	300.15	1256.93	169.18	1415.2	6737.06	7167.82	7167.82	3942.54	7167.82	1702.06	1261.67
S77	EE_T4_8_2	180226_M01270_0436_000000000-BL376_1_11226GT0077L01	S77	EE	T4	SW+O+Disp2	2	Sw+O+Dsns	0	0	0	72.43	0	0	0	0	0	0	0	0	98.26	98.26	98.26	98.26	0	0	0	0	0	0	0	0	0	0	0
S63	EE_T6_8_1	180226_M01270_0436_000000000-BL376_1_11226GT0063L01	S63	EE	T6	SW+O+Disp2	1	Sw+O+Dsns	3628.58	990.71	201.33	211.15	170.78	418.05	321.91	261.17	354.75	78.24	6481.78	4654.71	6046.26	5301.85	4503.18	7256.66	645.52	2817.13	453.58	1223.2	540.71	12194.8	12375.5	6683.5	5516.08	2406.18	2617.74
S71	EE_T6_8_2	180226_M01270_0436_000000000-BL376_1_11226GT0071L01	S71	EE	T6	SW+O+Disp2	2	Sw+O+Dsns	783.22	215.99	153.39	132.01	84.33	174.52	117.95	131.41	182.27	182.27	3907.22	1453.9	1863.8	1759.45	1759.45	2758.28	191.74	999	0	266	118.65	3173.62	1676.62	1676.62	591.69	591.69	748.05
S20	EE_T2_10_1	180226_M01270_0436_000000000-BL376_1_11226GT0020L01	S20	EE	T2	CEWAF+N+Disp2	1	Sw+O+Dsns+N	3056.44	922.22	126.2	145.62	122.27	274.9	217.18	248.67	198.91	198.91	2484.3	4041.1	159.33	2149.22	2149.22	3795.81	76.71	1560.39	0	797.32	797.32	8938.2	5139.51	5139.51	2024.53	2024.53	1553.01
S28	EE_T2_10_2	180226_M01270_0436_000000000-BL376_1_11226GT0028L01	S28	EE	T2	CEWAF+N+Disp2	2	Sw+O+Dsns+N	1310.7	447.99	48.93	75.55	44.82	168.3	119.11	141.94	119.44	119.44	1126.46	2104.93	79.32	1066.81	1066.81	1823.52	36.36	777.42	0	457.64	457.64	4269.5	2504.95	2504.95	1178.23	1178.23	791.19
S06	EE_T4_10_2	180226_M01270_0436_000000000-BL376_1_11226GT0006L01	S06	EE	T4	CEWAF+N+Disp2	2	Sw+O+Dsns+N	29.5	40.73	0	0	0	0	0	0	0	0	0	7.56	278.89	268.94	268.94	231.46	119.46	119.46	0	33.37	33.37	349.7	577.04	340.95	332.63	332.63	332.63
S93	EE_T4_10_1	180226_M01270_0436_000000000-BL376_1_11226GT0093L01	S93	EE	T4	CEWAF+N+Disp2	1	Sw+O+Dsns+N	0	0	0	0	0	0	0	0	0	0	0	97.13	51.34	256.22	256.22	131.95	131.95	131.95	2679.9	0	0	314.78	314.78	314.78	199.63	199.63	0
S08	EE_T6_10_2	180226_M01270_0436_000000000-BL376_1_11226GT0008L01	S08	EE	T6	CEWAF+N+Disp2	2	Sw+O+Dsns+N	1939.96	554.78	161.03	185.39	45.25	317.3	249.37	186.51	276.81	276.81	4144.64	3004.3	3888.52	2832.69	2832.69	4615.94	411.29	1861.09	198.07	691.37	324.83	7360.59	3969.73	3969.73	3342.99	1492.4	1536.38
S95	EE_T6_10_1	180226_M01270_0436_000000000-BL376_1_11226GT0095L01	S95	EE	T6	CEWAF+N+Disp2	1	Sw+O+Dsns+N	741.97	243.56	454.11	284.57	212.89	508.57	360.34	489.61	445.64	445.64	7979.2	4410.78	5959.13	5236.76	4601.65	7493.95	654.57	2954.6	0	568.9	261.49	7344	7685.55	4349.3	3982.55	1690.9	1945.38
S52	EE_T2_12_1	180226_M01270_0436_000000000-BL376_1_11226GT0052L01	S52	EE	T2	SW+O+N	1	Sw+O+N	152.43	85.9	39.88	40.06	80.15	188.42	171.13	167.2	134.29	134.29	1206.24	2248.56	2248.56	1045.98	1045.98	17.51	222.45	41.96	0	394.33	394.33	3067.3	1949.91	1949.91	989.58	989.58	665.57
S60	EE_T2_12_2	180226_M01270_0436_000000000-BL376_1_11226GT0060L01	S60	EE	T2	SW+O+N	2	Sw+O+N	6397.95	2104.66	345.81	375.29	97.62	768.52	553.71	686.34	565.9	565.9	5933.64	9683.56	408.64	5115.8	5115.8	8788.79	222.86	3718.99	0	1976.31	20153.8	20153.8	11647.4	11647.4	5058.35	5058.35	3851.63
S30	EE_T4_12_1	180226_M01270_0436_000000000-BL376_1_11226GT0030L01	S30	EE	T4	SW+O+N	1	Sw+O+N	0	0	0	10.63	0	0	0	0	0	0	0	0	0	0	0	0	0	0	0	0	0	0	0	0	0	0	0
S38	EE_T4_12_2	180226_M01270_0436_000000000-BL376_1_11226GT0038L01	S38	EE	T4	SW+O+N	2	Sw+O+N	3252.27	875.35	346.77	157.85	146.08	280.94	204.98	261.57	222.55	222.55	109.02	4894.5	4894.5	2789.14	2789.14	4669.9	52.98	1872.3	235.43	539.38	539.38	11005	5964.2	5964.2	2253.26	2253.26	2031.85
S32	EE_T6_12_1	180226_M01270_0436_000000000-BL376_1_11226GT0032L01	S32	EE	T6	SW+O+N	1	Sw+O+N	2738.76	777.39	141.17	154.47	139.29	304.14	216.89	274.52	258.25	258.25	3803.89	3376.07	4401.8	3829.17	2974.85	4672.72	434.7	1777.57	256.71	1110.04	489.82	9245.24	9615.61	4885.66	3951.96	1847.04	1837.12
S40	EE_T6_12_2	180226_M01270_0436_000000000-BL376_1_11226GT0040L01	S40	EE	T6	SW+O+N	2	Sw+O+N	2738.76	777.39	141.17	154.47	139.29	304.14	216.89	274.52	258.25	258.25	3803.89	3376.07	4401.8	3829.17	2974.85	4672.72	434.7	1777.57	256.71	1110.04	489.82	9245.24	9615.61	4885.66	3951.96	1847.04	1837.12
