# Supplementary material
Source: Research Square preprint supplement (doi:10.21203/rs.3.rs-8280185/v1)
Supplement: Supplementary file 4 [file 9bafc1f3e4978130d5a377de.xlsx]

## Sheet: V3_V4
Sample Name	Original reads per sample	Numer of reads after Dada2	ASV Abundances after Dada2	Number of reads after Deblur	Number of Deblur ASVs			DADA2	DEBLUR
100-Pl2	113566	107167	1373	40184	40184		TOTAL UNIQUE ASVS	1597	21162
101-Pl2	115137	109572	1068	36093	36093
102-Pl2	141698	135122	8095	41562	41562
103-Pl2	143514	136693	948	38409	38409
104-Pl2	114344	109533	3370	38064	38064
105-Pl2	83192	78020	2153	26405	26405
106-Pl2	89705	85205	5661	30713	30713
107-Pl2	141994	134485	2526	39882	39882
108-Pl2	105994	100600	2659	30406	30406
109-Pl2	165289	157322	26235	59897	59897
110-Pl2	59106	55775	1631	16467	16467
111-Pl2	110353	102516	3654	36940	36940
112-Pl2	109099	103556	10444	39493	39493
113-Pl2	97886	92954	8969	34831	34831
114-Pl2	84938	80652	14854	30638	30638
115-Pl2	117711	111366	5530	37294	37294
116-Pl2	70939	66037	6220	24037	24037
117-Pl2	53294	50981	5890	17899	17899
118-Pl2	75662	72070	9903	26882	26882
119-Pl2	141729	131227	3278	34832	34832
120-Pl2	132058	124854	2785	42627	42627
121-Pl2	104283	98909	5687	30223	30223
122-Pl2	67155	63557	743	17439	17439
123-Pl2	101704	96994	4975	28953	28953
124-Pl2	98351	90671	1588	30666	30666
125-Pl2	118044	111341	1436	33853	33853
126-Pl2	94650	90035	10244	31739	31739
127-Pl2	96853	91417	5312	27896	27896
128-Pl2	121150	115323	1567	33303	33303
129-Pl2	76211	72887	2002	23432	23432
130-Pl2	90551	84026	3493	29792	29792
131-Pl2	155027	146375	9869	53806	53806
132-Pl2	147082	137607	1394	41749	41749
133-Pl2	55113	52840	605	16083	16083
134-Pl2	84013	80460	2877	26830	26830
135-Pl2	78481	74299	1927	26953	26953
136-Pl2	61481	58650	3612	19447	19447
137-Pl2	84935	81292	11910	28370	28370
138-Pl2	62218	59590	805	18514	18514
139-Pl2	85535	81885	2076	25937	25937
140-Pl2	72445	68455	3381	23070	23070
141-Pl2	53773	50796	2490	17821	17821
142-Pl2	62321	59734	8752	22417	22417
189-Pl2	72708	68498	837	20882	20882
190-Pl2	50560	47230	855	13701	13701
97-Pl2	136200	129705	1266	43202	43202
98-Pl2	107009	102146	705	31120	31120
99-Pl2	133897	126189	1299	44386	44386
	4738958	4486618	218953	1485139	1485139

## Sheet: V4
Sample Name	Number of reads before QC	Numer of reads after Dada2	Number of ASVs after Dada2	Number of reads after Deblur	Number of ASVs afetr Deblur			DADA2	DEBLUR
S01	110738	94979	56296	45217	45217		TOTAL UNIQUE ASVS	3858	26659
S02	93832	79669	49174	39209	39209
S03	117438	101525	70367	53410	53410
S04	93343	79303	53502	39681	39681
S05	93764	82627	54491	41688	41688
S06	92026	80485	58087	43767	43767
S07	115228	97868	62058	49673	49673
S08	113271	94919	63828	47944	47944
S09	65262	54745	37107	26973	26973
S10	121669	103707	67565	51683	51683
S11	112072	95331	66557	49150	49150
S12	87002	75492	53652	39676	39676
S13	104511	89760	65727	49798	49798
S14	90801	80788	59647	46353	46353
S15	168390	142637	99409	74813	74813
S16	78989	68290	45692	37246	37246
S17	101156	86139	58360	44516	44516
S18	103783	87595	60580	44652	44652
S19	114721	96775	81457	65394	65394
S20	113960	98185	79096	59454	59454
S21	137269	118959	99167	74508	74508
S22	115579	98060	67452	51904	51904
S23	113096	94758	61942	46157	46157
S24	96738	81853	54461	41830	41830
S25	117466	98846	74478	56779	56779
S26	189535	157778	115663	87860	87860
S27	117354	100025	77961	60707	60707
S28	114918	98869	73985	60799	60799
S29	140353	121922	93735	71776	71776
S30	124563	108130	79249	62436	62436
S31	57862	49915	36704	27990	27990
S32	93403	81537	67489	52615	52615
S33	84487	77753	68844	54790	54790
S34	156612	138637	122346	90142	90142
S35	125765	110119	96017	73711	73711
S36	127803	110455	82444	69883	69883
S37	92936	78063	58028	44981	44981
S38	100441	88558	70224	55853	55853
S39	110016	90527	52471	45604	45604
S40	82981	68532	42907	35733	35733
S41	80901	71021	45409	36789	36789
S42	98035	84412	59310	45243	45243
S43	121581	107193	95113	74836	74836
S44	65801	58049	51452	39181	39181
S45	81049	69528	50468	43039	43039
S46	108617	93463	70548	53420	53420
S47	88893	77815	60493	49593	49593
S48	96270	83439	61753	48873	48873
S49	125657	109586	79744	63489	63489
S50	148917	129448	101025	78129	78129
S51	124070	105472	73404	58351	58351
S52	61723	54117	38097	31498	31498
S53	113490	100663	90342	69367	69367
S54	111701	97271	81631	68117	68117
S55	142621	122399	97752	78161	78161
S56	108838	94226	70629	54943	54943
S57	95801	80278	53464	43620	43620
S58	92077	79696	51431	46008	46008
S59	51852	43838	31010	24998	24998
S60	122937	104729	63661	55438	55438
S61	91729	78682	48887	41131	41131
S62	111436	94645	64337	50901	50901
S63	104867	91894	58852	50791	50791
S64	113757	100510	88948	74386	74386
S65	109329	96355	86441	68135	68135
S66	82074	70241	52730	37836	37836
S67	105461	89974	61472	47152	47152
S68	100019	86663	68028	53147	53147
S69	88206	78056	63394	48259	48259
S70	148472	130678	114049	84176	84176
S71	69666	62812	53438	40142	40142
S72	87496	71939	48156	38792	38792
S73	138862	114539	74734	60389	60389
S74	133746	117325	98546	78415	78415
S75	91511	80943	67251	54322	54322
S76	109038	93731	78135	64240	64240
S77	143169	127964	106861	90465	90465
S78	65639	58593	50042	42557	42557
S79	83296	71328	55025	43300	43300
S80	86972	74398	49635	39178	39178
S81	114748	96636	63293	50424	50424
S82	100004	81846	50371	41839	41839
S83	88159	74304	46111	39669	39669
S84	123188	106267	71175	60351	60351
S85	102020	87310	54519	45825	45825
S86	102252	88942	60752	47579	47579
S87	53581	46649	29448	23761	23761
S88	106183	92925	70375	57584	57584
S89	132214	115153	100971	76972	76972
S90	106769	92824	72380	58115	58115
S91	86107	73709	58475	46996	46996
S92	114308	98228	75901	59653	59653
S93	116887	99628	81290	62901	62901
S94	105489	91180	78523	65517	65517
S95	103089	87963	69266	54341	54341
	10051707

## Sheet: NBC Dada2
	samples	all	species	archael_species	bacterial_species	measure		NBC_Dada2	Final Reads	Resolved to species level
100-Pl2	100-Pl2	1373	1	0	1	NBC_DADA2		V3-V4	218953	6901
101-Pl2	101-Pl2	1068	19	3	16	NBC_DADA2		V4	6436766	390239
102-Pl2	102-Pl2	8095	268	0	268	NBC_DADA2
103-Pl2	103-Pl2	948	415	0	415	NBC_DADA2
104-Pl2	104-Pl2	3370	65	0	65	NBC_DADA2
105-Pl2	105-Pl2	2153	118	3	115	NBC_DADA2
106-Pl2	106-Pl2	5661	36	0	36	NBC_DADA2
107-Pl2	107-Pl2	2526	27	0	27	NBC_DADA2
108-Pl2	108-Pl2	2659	0	0	0	NBC_DADA2
109-Pl2	109-Pl2	26235	100	0	100	NBC_DADA2
110-Pl2	110-Pl2	1631	165	0	165	NBC_DADA2
111-Pl2	111-Pl2	3654	186	0	186	NBC_DADA2
112-Pl2	112-Pl2	10444	261	0	261	NBC_DADA2
113-Pl2	113-Pl2	8969	56	0	56	NBC_DADA2
114-Pl2	114-Pl2	14854	103	0	103	NBC_DADA2
115-Pl2	115-Pl2	5530	96	0	96	NBC_DADA2
116-Pl2	116-Pl2	6220	172	0	172	NBC_DADA2
117-Pl2	117-Pl2	5890	255	0	255	NBC_DADA2
118-Pl2	118-Pl2	9903	4	0	4	NBC_DADA2
119-Pl2	119-Pl2	3278	14	12	2	NBC_DADA2
120-Pl2	120-Pl2	2785	15	0	15	NBC_DADA2
121-Pl2	121-Pl2	5687	164	0	164	NBC_DADA2
122-Pl2	122-Pl2	743	143	0	143	NBC_DADA2
123-Pl2	123-Pl2	4975	46	0	46	NBC_DADA2
124-Pl2	124-Pl2	1588	18	0	18	NBC_DADA2
125-Pl2	125-Pl2	1436	88	0	88	NBC_DADA2
126-Pl2	126-Pl2	10244	17	0	17	NBC_DADA2
127-Pl2	127-Pl2	5312	109	0	109	NBC_DADA2
128-Pl2	128-Pl2	1567	245	0	245	NBC_DADA2
129-Pl2	129-Pl2	2002	136	0	136	NBC_DADA2
130-Pl2	130-Pl2	3493	102	0	102	NBC_DADA2
131-Pl2	131-Pl2	9869	10	0	10	NBC_DADA2
132-Pl2	132-Pl2	1394	5	0	5	NBC_DADA2
133-Pl2	133-Pl2	605	215	0	215	NBC_DADA2
134-Pl2	134-Pl2	2877	106	0	106	NBC_DADA2
135-Pl2	135-Pl2	1927	525	0	525	NBC_DADA2
136-Pl2	136-Pl2	3612	70	0	70	NBC_DADA2
137-Pl2	137-Pl2	11910	1338	0	1338	NBC_DADA2
138-Pl2	138-Pl2	805	402	0	402	NBC_DADA2
139-Pl2	139-Pl2	2076	42	0	42	NBC_DADA2
140-Pl2	140-Pl2	3381	364	0	364	NBC_DADA2
141-Pl2	141-Pl2	2490	237	0	237	NBC_DADA2
142-Pl2	142-Pl2	8752	45	0	45	NBC_DADA2
189-Pl2	189-Pl2	837	5	0	5	NBC_DADA2
190-Pl2	190-Pl2	855	0	0	0	NBC_DADA2
97-Pl2	97-Pl2	1266	66	0	66	NBC_DADA2
98-Pl2	98-Pl2	705	0	0	0	NBC_DADA2
99-Pl2	99-Pl2	1299	27	0	27	NBC_DADA2
S01	S01	56296	60	0	60	NBC_DADA2
S02	S02	49174	125	0	125	NBC_DADA2
S03	S03	70367	882	0	882	NBC_DADA2
S04	S04	53502	243	0	243	NBC_DADA2
S05	S05	54491	1097	0	1097	NBC_DADA2
S06	S06	58087	1872	0	1872	NBC_DADA2
S07	S07	62058	169	0	169	NBC_DADA2
S08	S08	63828	1065	0	1065	NBC_DADA2
S09	S09	37107	640	0	640	NBC_DADA2
S10	S10	67565	639	0	639	NBC_DADA2
S11	S11	66557	468	0	468	NBC_DADA2
S12	S12	53652	453	0	453	NBC_DADA2
S13	S13	65727	133	0	133	NBC_DADA2
S14	S14	59647	88	0	88	NBC_DADA2
S15	S15	99409	934	0	934	NBC_DADA2
S16	S16	45692	1097	0	1097	NBC_DADA2
S17	S17	58360	739	0	739	NBC_DADA2
S18	S18	60580	1251	0	1251	NBC_DADA2
S19	S19	81457	1426	0	1426	NBC_DADA2
S20	S20	79096	788	0	788	NBC_DADA2
S21	S21	99167	26	0	26	NBC_DADA2
S22	S22	67452	1106	0	1106	NBC_DADA2
S23	S23	61942	334	0	334	NBC_DADA2
S24	S24	54461	380	0	380	NBC_DADA2
S25	S25	74478	4679	0	4679	NBC_DADA2
S26	S26	115663	5574	0	5574	NBC_DADA2
S27	S27	77961	4533	0	4533	NBC_DADA2
S28	S28	73985	6010	0	6010	NBC_DADA2
S29	S29	93735	106	0	106	NBC_DADA2
S30	S30	79249	168	0	168	NBC_DADA2
S31	S31	36704	789	0	789	NBC_DADA2
S32	S32	67489	612	0	612	NBC_DADA2
S33	S33	68844	0	0	0	NBC_DADA2
S34	S34	122346	27	0	27	NBC_DADA2
S35	S35	96017	2	0	2	NBC_DADA2
S36	S36	82444	853	0	853	NBC_DADA2
S37	S37	58028	430	0	430	NBC_DADA2
S38	S38	70224	2	0	2	NBC_DADA2
S39	S39	52471	615	0	615	NBC_DADA2
S40	S40	42907	604	0	604	NBC_DADA2
S41	S41	45409	3284	0	3284	NBC_DADA2
S42	S42	59310	3802	0	3802	NBC_DADA2
S43	S43	95113	64	0	64	NBC_DADA2
S44	S44	51452	57	0	57	NBC_DADA2
S45	S45	50468	2821	0	2821	NBC_DADA2
S46	S46	70548	4048	0	4048	NBC_DADA2
S47	S47	60493	4575	0	4575	NBC_DADA2
S48	S48	61753	18718	0	18718	NBC_DADA2
S49	S49	79744	177	0	177	NBC_DADA2
S50	S50	101025	153	0	153	NBC_DADA2
S51	S51	73404	1063	0	1063	NBC_DADA2
S52	S52	38097	541	0	541	NBC_DADA2
S53	S53	90342	156	0	156	NBC_DADA2
S54	S54	81631	8	0	8	NBC_DADA2
S55	S55	97752	117	0	117	NBC_DADA2
S56	S56	70629	115	0	115	NBC_DADA2
S57	S57	53464	750	0	750	NBC_DADA2
S58	S58	51431	794	0	794	NBC_DADA2
S59	S59	31010	979	0	979	NBC_DADA2
S60	S60	63661	1452	0	1452	NBC_DADA2
S61	S61	48887	1222	0	1222	NBC_DADA2
S62	S62	64337	11995	0	11995	NBC_DADA2
S63	S63	58852	20714	0	20714	NBC_DADA2
S64	S64	88948	1087	0	1087	NBC_DADA2
S65	S65	86441	87	0	87	NBC_DADA2
S66	S66	52730	8985	0	8985	NBC_DADA2
S67	S67	61472	9334	0	9334	NBC_DADA2
S68	S68	68028	4130	0	4130	NBC_DADA2
S69	S69	63394	6790	0	6790	NBC_DADA2
S70	S70	114049	1707	0	1707	NBC_DADA2
S71	S71	53438	1751	0	1751	NBC_DADA2
S72	S72	48156	1399	0	1399	NBC_DADA2
S73	S73	74734	2140	0	2140	NBC_DADA2
S74	S74	98546	61	0	61	NBC_DADA2
S75	S75	67251	89	0	89	NBC_DADA2
S76	S76	78135	16	0	16	NBC_DADA2
S77	S77	106861	16	0	16	NBC_DADA2
S78	S78	50042	992	0	992	NBC_DADA2
S79	S79	55025	124	0	124	NBC_DADA2
S80	S80	49635	1393	0	1393	NBC_DADA2
S81	S81	63293	883	0	883	NBC_DADA2
S82	S82	50371	0	0	0	NBC_DADA2
S83	S83	46111	0	0	0	NBC_DADA2
S84	S84	71175	1570	0	1570	NBC_DADA2
S85	S85	54519	1466	0	1466	NBC_DADA2
S86	S86	60752	9850	0	9850	NBC_DADA2
S87	S87	29448	3848	0	3848	NBC_DADA2
S88	S88	70375	5329	0	5219	NBC_DADA2
S89	S89	100971	1011	0	1011	NBC_DADA2
S90	S90	72380	27350	0	27350	NBC_DADA2
S91	S91	58475	28934	0	28934	NBC_DADA2
S92	S92	75901	21032	0	21032	NBC_DADA2
S93	S93	81290	26994	0	26994	NBC_DADA2
S94	S94	78523	76245	0	76245	NBC_DADA2
S95	S95	69266	27002	0	27002	NBC_DADA2

## Sheet: NBC Deblur
	samples	all	species	archael_species	bacterial_species	measure
100-Pl2	100-Pl2	40184	3	0	3	NBC_DEBLUR		NBC_Deblur	Final Reads	Resolved to species level
101-Pl2	101-Pl2	36093	4	0	4	NBC_DEBLUR		V3-V4	1490172	163
102-Pl2	102-Pl2	41562	20	0	20	NBC_DEBLUR		V4	5033472	117821
103-Pl2	103-Pl2	38409	1	0	1	NBC_DEBLUR
104-Pl2	104-Pl2	38064	3	0	3	NBC_DEBLUR
105-Pl2	105-Pl2	26405	10	0	10	NBC_DEBLUR
106-Pl2	106-Pl2	30713	2	0	2	NBC_DEBLUR
107-Pl2	107-Pl2	39882	2	0	2	NBC_DEBLUR
108-Pl2	108-Pl2	30406	3	0	3	NBC_DEBLUR
109-Pl2	109-Pl2	59897	0	0	0	NBC_DEBLUR
110-Pl2	110-Pl2	16467	0	0	0	NBC_DEBLUR
111-Pl2	111-Pl2	36940	0	0	0	NBC_DEBLUR
112-Pl2	112-Pl2	39493	0	0	0	NBC_DEBLUR
113-Pl2	113-Pl2	34831	0	0	0	NBC_DEBLUR
114-Pl2	114-Pl2	30638	1	0	1	NBC_DEBLUR
115-Pl2	115-Pl2	37294	3	1	2	NBC_DEBLUR
116-Pl2	116-Pl2	24037	2	0	2	NBC_DEBLUR
117-Pl2	117-Pl2	17899	0	0	0	NBC_DEBLUR
118-Pl2	118-Pl2	26882	3	0	3	NBC_DEBLUR
119-Pl2	119-Pl2	34832	17	11	6	NBC_DEBLUR
120-Pl2	120-Pl2	42627	2	0	2	NBC_DEBLUR
121-Pl2	121-Pl2	30223	2	0	2	NBC_DEBLUR
122-Pl2	122-Pl2	17439	0	0	0	NBC_DEBLUR
123-Pl2	123-Pl2	28953	7	0	7	NBC_DEBLUR
124-Pl2	124-Pl2	30666	3	0	3	NBC_DEBLUR
125-Pl2	125-Pl2	33853	0	0	0	NBC_DEBLUR
126-Pl2	126-Pl2	31739	3	0	3	NBC_DEBLUR
127-Pl2	127-Pl2	27896	5	0	5	NBC_DEBLUR
128-Pl2	128-Pl2	33303	0	0	0	NBC_DEBLUR
129-Pl2	129-Pl2	23432	2	1	1	NBC_DEBLUR
130-Pl2	130-Pl2	29792	1	0	1	NBC_DEBLUR
131-Pl2	131-Pl2	53806	0	0	0	NBC_DEBLUR
132-Pl2	132-Pl2	41749	4	0	4	NBC_DEBLUR
133-Pl2	133-Pl2	16083	0	0	0	NBC_DEBLUR
134-Pl2	134-Pl2	26830	0	0	0	NBC_DEBLUR
135-Pl2	135-Pl2	26953	2	0	2	NBC_DEBLUR
136-Pl2	136-Pl2	19447	1	0	1	NBC_DEBLUR
137-Pl2	137-Pl2	28370	1	0	1	NBC_DEBLUR
138-Pl2	138-Pl2	18514	0	0	0	NBC_DEBLUR
139-Pl2	139-Pl2	25937	0	0	0	NBC_DEBLUR
140-Pl2	140-Pl2	23070	0	0	0	NBC_DEBLUR
141-Pl2	141-Pl2	17821	0	0	0	NBC_DEBLUR
142-Pl2	142-Pl2	22417	0	0	0	NBC_DEBLUR
189-Pl2	189-Pl2	20882	2	0	2	NBC_DEBLUR
190-Pl2	190-Pl2	13701	0	0	0	NBC_DEBLUR
97-Pl2	97-Pl2	43202	7	0	7	NBC_DEBLUR
98-Pl2	98-Pl2	31120	3	0	3	NBC_DEBLUR
99-Pl2	99-Pl2	44386	3	0	3	NBC_DEBLUR
S01	S01	45217	44	0	44	NBC_DEBLUR
S02	S02	39209	63	0	63	NBC_DEBLUR
S03	S03	53410	249	0	249	NBC_DEBLUR
S04	S04	39681	84	0	84	NBC_DEBLUR
S05	S05	41688	244	0	244	NBC_DEBLUR
S06	S06	43767	540	0	540	NBC_DEBLUR
S07	S07	49673	66	0	66	NBC_DEBLUR
S08	S08	47944	224	0	224	NBC_DEBLUR
S09	S09	26973	134	0	134	NBC_DEBLUR
S10	S10	51683	92	0	92	NBC_DEBLUR
S11	S11	49150	79	0	79	NBC_DEBLUR
S12	S12	39676	58	0	58	NBC_DEBLUR
S13	S13	49798	56	0	56	NBC_DEBLUR
S14	S14	46353	28	0	28	NBC_DEBLUR
S15	S15	74813	225	0	225	NBC_DEBLUR
S16	S16	37246	173	0	173	NBC_DEBLUR
S17	S17	44516	162	0	162	NBC_DEBLUR
S18	S18	44652	236	0	236	NBC_DEBLUR
S19	S19	65394	372	0	372	NBC_DEBLUR
S20	S20	59454	136	0	136	NBC_DEBLUR
S21	S21	74508	23	0	23	NBC_DEBLUR
S22	S22	51904	321	0	321	NBC_DEBLUR
S23	S23	46157	66	0	66	NBC_DEBLUR
S24	S24	41830	72	0	72	NBC_DEBLUR
S25	S25	56779	4507	0	4507	NBC_DEBLUR
S26	S26	87860	5519	0	5519	NBC_DEBLUR
S27	S27	60707	1115	0	1115	NBC_DEBLUR
S28	S28	60799	1646	0	1646	NBC_DEBLUR
S29	S29	71776	48	0	48	NBC_DEBLUR
S30	S30	62436	37	0	37	NBC_DEBLUR
S31	S31	27990	168	0	168	NBC_DEBLUR
S32	S32	52615	168	0	168	NBC_DEBLUR
S33	S33	54790	3	0	3	NBC_DEBLUR
S34	S34	90142	22	0	22	NBC_DEBLUR
S35	S35	73711	11	0	11	NBC_DEBLUR
S36	S36	69883	188	0	188	NBC_DEBLUR
S37	S37	44981	29	0	29	NBC_DEBLUR
S38	S38	55853	6	0	6	NBC_DEBLUR
S39	S39	45604	5	0	5	NBC_DEBLUR
S40	S40	35733	10	0	10	NBC_DEBLUR
S41	S41	36789	208	0	208	NBC_DEBLUR
S42	S42	45243	504	0	504	NBC_DEBLUR
S43	S43	74836	54	0	54	NBC_DEBLUR
S44	S44	39181	42	0	42	NBC_DEBLUR
S45	S45	43039	553	0	553	NBC_DEBLUR
S46	S46	53420	681	0	681	NBC_DEBLUR
S47	S47	49593	206	0	206	NBC_DEBLUR
S48	S48	48873	3230	0	3230	NBC_DEBLUR
S49	S49	63489	64	0	64	NBC_DEBLUR
S50	S50	78129	53	0	53	NBC_DEBLUR
S51	S51	58351	87	0	87	NBC_DEBLUR
S52	S52	31498	86	0	86	NBC_DEBLUR
S53	S53	69367	9	0	9	NBC_DEBLUR
S54	S54	68117	11	0	11	NBC_DEBLUR
S55	S55	78161	30	0	30	NBC_DEBLUR
S56	S56	54943	15	0	15	NBC_DEBLUR
S57	S57	43620	104	0	104	NBC_DEBLUR
S58	S58	46008	67	0	67	NBC_DEBLUR
S59	S59	24998	259	0	259	NBC_DEBLUR
S60	S60	55438	89	0	89	NBC_DEBLUR
S61	S61	41131	83	0	83	NBC_DEBLUR
S62	S62	50901	296	0	296	NBC_DEBLUR
S63	S63	50791	81	0	81	NBC_DEBLUR
S64	S64	74386	154	0	154	NBC_DEBLUR
S65	S65	68135	51	0	51	NBC_DEBLUR
S66	S66	37836	2739	0	2739	NBC_DEBLUR
S67	S67	47152	2019	0	2019	NBC_DEBLUR
S68	S68	53147	443	0	443	NBC_DEBLUR
S69	S69	48259	748	0	748	NBC_DEBLUR
S70	S70	84176	8	0	8	NBC_DEBLUR
S71	S71	40142	221	0	221	NBC_DEBLUR
S72	S72	38792	308	0	308	NBC_DEBLUR
S73	S73	60389	435	0	435	NBC_DEBLUR
S74	S74	78415	20	0	20	NBC_DEBLUR
S75	S75	54322	7	0	7	NBC_DEBLUR
S76	S76	64240	30	0	30	NBC_DEBLUR
S77	S77	90465	19	0	19	NBC_DEBLUR
S78	S78	42557	269	0	269	NBC_DEBLUR
S79	S79	43300	34	0	34	NBC_DEBLUR
S80	S80	39178	412	0	412	NBC_DEBLUR
S81	S81	50424	221	0	221	NBC_DEBLUR
S82	S82	41839	6	0	6	NBC_DEBLUR
S83	S83	39669	6	0	6	NBC_DEBLUR
S84	S84	60351	348	0	348	NBC_DEBLUR
S85	S85	45825	399	0	399	NBC_DEBLUR
S86	S86	47579	998	0	998	NBC_DEBLUR
S87	S87	23761	317	0	317	NBC_DEBLUR
S88	S88	57584	389	0	389	NBC_DEBLUR
S89	S89	76972	185	0	185	NBC_DEBLUR
S90	S90	58115	5527	0	5527	NBC_DEBLUR
S91	S91	46996	4903	0	4903	NBC_DEBLUR
S92	S92	59653	3045	0	3045	NBC_DEBLUR
S93	S93	62901	2457	0	2457	NBC_DEBLUR
S94	S94	65517	63190	0	63190	NBC_DEBLUR
S95	S95	54341	3916	0	3916	NBC_DEBLUR

## Sheet: BLCA Dada2
	samples	all	species	archael_species	bacterial_species	measure		BLCA_DADA2	Final Reads	Resolved to species level
100-Pl2	100-Pl2	1373	1373	0	1373	BLCA_DADA2		V3-V4	218953	218632
101-Pl2	101-Pl2	1068	1068	3	1065	BLCA_DADA2		V4	6436766	6420652
102-Pl2	102-Pl2	8095	8092	0	8092	BLCA_DADA2
103-Pl2	103-Pl2	948	939	0	939	BLCA_DADA2
104-Pl2	104-Pl2	3370	3370	0	3370	BLCA_DADA2
105-Pl2	105-Pl2	2153	2149	3	2146	BLCA_DADA2
106-Pl2	106-Pl2	5661	5651	0	5651	BLCA_DADA2
107-Pl2	107-Pl2	2526	2518	0	2518	BLCA_DADA2
108-Pl2	108-Pl2	2659	2659	0	2659	BLCA_DADA2
109-Pl2	109-Pl2	26235	26225	0	26225	BLCA_DADA2
110-Pl2	110-Pl2	1631	1631	0	1631	BLCA_DADA2
111-Pl2	111-Pl2	3654	3649	0	3649	BLCA_DADA2
112-Pl2	112-Pl2	10444	10442	0	10442	BLCA_DADA2
113-Pl2	113-Pl2	8969	8964	0	8964	BLCA_DADA2
114-Pl2	114-Pl2	14854	14840	0	14840	BLCA_DADA2
115-Pl2	115-Pl2	5530	5528	0	5528	BLCA_DADA2
116-Pl2	116-Pl2	6220	6213	0	6213	BLCA_DADA2
117-Pl2	117-Pl2	5890	5887	0	5887	BLCA_DADA2
118-Pl2	118-Pl2	9903	9869	0	9869	BLCA_DADA2
119-Pl2	119-Pl2	3278	3270	12	3258	BLCA_DADA2
120-Pl2	120-Pl2	2785	2785	0	2785	BLCA_DADA2
121-Pl2	121-Pl2	5687	5679	0	5679	BLCA_DADA2
122-Pl2	122-Pl2	743	708	0	708	BLCA_DADA2
123-Pl2	123-Pl2	4975	4967	0	4967	BLCA_DADA2
124-Pl2	124-Pl2	1588	1588	0	1588	BLCA_DADA2
125-Pl2	125-Pl2	1436	1434	0	1434	BLCA_DADA2
126-Pl2	126-Pl2	10244	10239	0	10239	BLCA_DADA2
127-Pl2	127-Pl2	5312	5306	0	5306	BLCA_DADA2
128-Pl2	128-Pl2	1567	1531	0	1531	BLCA_DADA2
129-Pl2	129-Pl2	2002	2002	0	2002	BLCA_DADA2
130-Pl2	130-Pl2	3493	3493	0	3493	BLCA_DADA2
131-Pl2	131-Pl2	9869	9861	0	9861	BLCA_DADA2
132-Pl2	132-Pl2	1394	1391	0	1391	BLCA_DADA2
133-Pl2	133-Pl2	605	599	0	599	BLCA_DADA2
134-Pl2	134-Pl2	2877	2877	0	2877	BLCA_DADA2
135-Pl2	135-Pl2	1927	1922	0	1922	BLCA_DADA2
136-Pl2	136-Pl2	3612	3610	0	3610	BLCA_DADA2
137-Pl2	137-Pl2	11910	11908	0	11908	BLCA_DADA2
138-Pl2	138-Pl2	805	776	0	776	BLCA_DADA2
139-Pl2	139-Pl2	2076	2076	0	2076	BLCA_DADA2
140-Pl2	140-Pl2	3381	3379	0	3379	BLCA_DADA2
141-Pl2	141-Pl2	2490	2486	0	2486	BLCA_DADA2
142-Pl2	142-Pl2	8752	8726	0	8726	BLCA_DADA2
189-Pl2	189-Pl2	837	837	0	837	BLCA_DADA2
190-Pl2	190-Pl2	855	855	0	855	BLCA_DADA2
97-Pl2	97-Pl2	1266	1259	0	1259	BLCA_DADA2
98-Pl2	98-Pl2	705	705	0	705	BLCA_DADA2
99-Pl2	99-Pl2	1299	1296	0	1296	BLCA_DADA2
S01	S01	56296	56296	0	56296	BLCA_DADA2
S02	S02	49174	49171	0	49171	BLCA_DADA2
S03	S03	70367	70367	0	70367	BLCA_DADA2
S04	S04	53502	53502	0	53502	BLCA_DADA2
S05	S05	54491	54491	0	54491	BLCA_DADA2
S06	S06	58087	58054	0	58054	BLCA_DADA2
S07	S07	62058	62048	0	62048	BLCA_DADA2
S08	S08	63828	63800	0	63800	BLCA_DADA2
S09	S09	37107	37107	0	37107	BLCA_DADA2
S10	S10	67565	67565	0	67565	BLCA_DADA2
S11	S11	66557	66557	0	66557	BLCA_DADA2
S12	S12	53652	53650	0	53650	BLCA_DADA2
S13	S13	65727	65727	0	65727	BLCA_DADA2
S14	S14	59647	59641	0	59641	BLCA_DADA2
S15	S15	99409	99396	0	99396	BLCA_DADA2
S16	S16	45692	45692	0	45692	BLCA_DADA2
S17	S17	58360	58348	0	58348	BLCA_DADA2
S18	S18	60580	60580	0	60580	BLCA_DADA2
S19	S19	81457	81442	0	81442	BLCA_DADA2
S20	S20	79096	79089	0	79089	BLCA_DADA2
S21	S21	99167	99165	0	99165	BLCA_DADA2
S22	S22	67452	67452	0	67452	BLCA_DADA2
S23	S23	61942	61942	0	61942	BLCA_DADA2
S24	S24	54461	54461	0	54461	BLCA_DADA2
S25	S25	74478	74478	0	74478	BLCA_DADA2
S26	S26	115663	115645	0	115645	BLCA_DADA2
S27	S27	77961	77848	11	77837	BLCA_DADA2
S28	S28	73985	73974	0	73974	BLCA_DADA2
S29	S29	93735	93735	0	93735	BLCA_DADA2
S30	S30	79249	79249	0	79249	BLCA_DADA2
S31	S31	36704	36701	0	36701	BLCA_DADA2
S32	S32	67489	67487	0	67487	BLCA_DADA2
S33	S33	68844	68844	0	68844	BLCA_DADA2
S34	S34	122346	122346	0	122346	BLCA_DADA2
S35	S35	96017	96015	0	96015	BLCA_DADA2
S36	S36	82444	82444	0	82444	BLCA_DADA2
S37	S37	58028	58028	0	58028	BLCA_DADA2
S38	S38	70224	70222	0	70222	BLCA_DADA2
S39	S39	52471	52471	0	52471	BLCA_DADA2
S40	S40	42907	42907	0	42907	BLCA_DADA2
S41	S41	45409	45397	0	45397	BLCA_DADA2
S42	S42	59310	59310	0	59310	BLCA_DADA2
S43	S43	95113	95113	0	95113	BLCA_DADA2
S44	S44	51452	51452	0	51452	BLCA_DADA2
S45	S45	50468	50468	0	50468	BLCA_DADA2
S46	S46	70548	70535	0	70535	BLCA_DADA2
S47	S47	60493	60493	0	60493	BLCA_DADA2
S48	S48	61753	61676	0	61676	BLCA_DADA2
S49	S49	79744	79744	0	79744	BLCA_DADA2
S50	S50	101025	101022	0	101022	BLCA_DADA2
S51	S51	73404	73402	0	73402	BLCA_DADA2
S52	S52	38097	38097	0	38097	BLCA_DADA2
S53	S53	90342	90342	0	90342	BLCA_DADA2
S54	S54	81631	81631	0	81631	BLCA_DADA2
S55	S55	97752	97752	0	97752	BLCA_DADA2
S56	S56	70629	70629	0	70629	BLCA_DADA2
S57	S57	53464	53464	0	53464	BLCA_DADA2
S58	S58	51431	51425	0	51425	BLCA_DADA2
S59	S59	31010	30990	0	30990	BLCA_DADA2
S60	S60	63661	63661	0	63661	BLCA_DADA2
S61	S61	48887	48887	0	48887	BLCA_DADA2
S62	S62	64337	64337	0	64337	BLCA_DADA2
S63	S63	58852	58839	0	58839	BLCA_DADA2
S64	S64	88948	88948	0	88948	BLCA_DADA2
S65	S65	86441	86441	0	86441	BLCA_DADA2
S66	S66	52730	52709	0	52709	BLCA_DADA2
S67	S67	61472	61427	0	61427	BLCA_DADA2
S68	S68	68028	68028	0	68028	BLCA_DADA2
S69	S69	63394	63379	0	63379	BLCA_DADA2
S70	S70	114049	114049	0	114049	BLCA_DADA2
S71	S71	53438	53423	0	53423	BLCA_DADA2
S72	S72	48156	48156	0	48156	BLCA_DADA2
S73	S73	74734	74729	0	74729	BLCA_DADA2
S74	S74	98546	98546	0	98546	BLCA_DADA2
S75	S75	67251	67251	0	67251	BLCA_DADA2
S76	S76	78135	78135	0	78135	BLCA_DADA2
S77	S77	106861	106861	0	106861	BLCA_DADA2
S78	S78	50042	50022	0	50022	BLCA_DADA2
S79	S79	55025	55025	0	55025	BLCA_DADA2
S80	S80	49635	49623	0	49623	BLCA_DADA2
S81	S81	63293	63291	0	63291	BLCA_DADA2
S82	S82	50371	50371	0	50371	BLCA_DADA2
S83	S83	46111	46111	0	46111	BLCA_DADA2
S84	S84	71175	71175	0	71175	BLCA_DADA2
S85	S85	54519	54519	0	54519	BLCA_DADA2
S86	S86	60752	60713	0	60713	BLCA_DADA2
S87	S87	29448	29448	0	29448	BLCA_DADA2
S88	S88	70375	70346	0	70223	BLCA_DADA2
S89	S89	100971	100971	0	100971	BLCA_DADA2
S90	S90	72380	68893	0	68893	BLCA_DADA2
S91	S91	58475	55833	0	55833	BLCA_DADA2
S92	S92	75901	73187	0	73187	BLCA_DADA2
S93	S93	81290	77610	0	77610	BLCA_DADA2
S94	S94	78523	78516	0	78516	BLCA_DADA2
S95	S95	69266	66313	0	66313	BLCA_DADA2

## Sheet: BLCA Deblur
	samples	all	species	archael_species	bacterial_species	measure		BLCA_Deblur	Final Reads	Resolved to species level
100-Pl2	100-Pl2	40184	40127	3	40124	BLCA_Deblur		V3-V4	1485139	1482255
101-Pl2	101-Pl2	36093	36032	4	36028	BLCA_Deblur		V4	5078689	5076042
102-Pl2	102-Pl2	41562	41403	9	41394	BLCA_Deblur
103-Pl2	103-Pl2	38409	38273	0	38273	BLCA_Deblur
104-Pl2	104-Pl2	38064	37967	2	37965	BLCA_Deblur
105-Pl2	105-Pl2	26405	26333	6	26327	BLCA_Deblur
106-Pl2	106-Pl2	30713	30671	1	30670	BLCA_Deblur
107-Pl2	107-Pl2	39882	39808	0	39808	BLCA_Deblur
108-Pl2	108-Pl2	30406	30288	0	30288	BLCA_Deblur
109-Pl2	109-Pl2	59897	59820	0	59820	BLCA_Deblur
110-Pl2	110-Pl2	16467	16430	0	16430	BLCA_Deblur
111-Pl2	111-Pl2	36940	36883	0	36883	BLCA_Deblur
112-Pl2	112-Pl2	39493	39436	0	39436	BLCA_Deblur
113-Pl2	113-Pl2	34831	34770	0	34770	BLCA_Deblur
114-Pl2	114-Pl2	30638	30587	0	30587	BLCA_Deblur
115-Pl2	115-Pl2	37294	37211	6	37205	BLCA_Deblur
116-Pl2	116-Pl2	24037	24014	0	24014	BLCA_Deblur
117-Pl2	117-Pl2	17899	17883	0	17883	BLCA_Deblur
118-Pl2	118-Pl2	26882	26858	0	26858	BLCA_Deblur
119-Pl2	119-Pl2	34832	34719	11	34708	BLCA_Deblur
120-Pl2	120-Pl2	42627	42561	0	42561	BLCA_Deblur
121-Pl2	121-Pl2	30223	30187	0	30187	BLCA_Deblur
122-Pl2	122-Pl2	17439	17392	0	17392	BLCA_Deblur
123-Pl2	123-Pl2	28953	28906	0	28906	BLCA_Deblur
124-Pl2	124-Pl2	30666	30604	1	30603	BLCA_Deblur
125-Pl2	125-Pl2	33853	33812	0	33812	BLCA_Deblur
126-Pl2	126-Pl2	31739	31701	0	31701	BLCA_Deblur
127-Pl2	127-Pl2	27896	27833	0	27833	BLCA_Deblur
128-Pl2	128-Pl2	33303	33233	0	33233	BLCA_Deblur
129-Pl2	129-Pl2	23432	23403	2	23401	BLCA_Deblur
130-Pl2	130-Pl2	29792	29764	0	29764	BLCA_Deblur
131-Pl2	131-Pl2	53806	53760	0	53760	BLCA_Deblur
132-Pl2	132-Pl2	41749	41686	0	41686	BLCA_Deblur
133-Pl2	133-Pl2	16083	16054	0	16054	BLCA_Deblur
134-Pl2	134-Pl2	26830	26800	0	26800	BLCA_Deblur
135-Pl2	135-Pl2	26953	26913	0	26913	BLCA_Deblur
136-Pl2	136-Pl2	19447	19420	0	19420	BLCA_Deblur
137-Pl2	137-Pl2	28370	28335	5	28330	BLCA_Deblur
138-Pl2	138-Pl2	18514	18488	0	18488	BLCA_Deblur
139-Pl2	139-Pl2	25937	25902	0	25902	BLCA_Deblur
140-Pl2	140-Pl2	23070	23014	0	23014	BLCA_Deblur
141-Pl2	141-Pl2	17821	17771	0	17771	BLCA_Deblur
142-Pl2	142-Pl2	22417	22405	0	22405	BLCA_Deblur
189-Pl2	189-Pl2	20882	20848	0	20848	BLCA_Deblur
190-Pl2	190-Pl2	13701	13670	0	13670	BLCA_Deblur
97-Pl2	97-Pl2	43202	42982	0	42982	BLCA_Deblur
98-Pl2	98-Pl2	31120	31059	0	31059	BLCA_Deblur
99-Pl2	99-Pl2	44386	44239	3	44236	BLCA_Deblur
S01	S01	45217	45199	0	45199	BLCA_Deblur
S02	S02	39209	39192	0	39192	BLCA_Deblur
S03	S03	53410	53392	0	53392	BLCA_Deblur
S04	S04	39681	39672	0	39672	BLCA_Deblur
S05	S05	41688	41669	0	41669	BLCA_Deblur
S06	S06	43767	43731	0	43731	BLCA_Deblur
S07	S07	49673	49643	0	49643	BLCA_Deblur
S08	S08	47944	47912	0	47912	BLCA_Deblur
S09	S09	26973	26958	0	26958	BLCA_Deblur
S10	S10	51683	51662	0	51662	BLCA_Deblur
S11	S11	49150	49129	0	49129	BLCA_Deblur
S12	S12	39676	39668	0	39668	BLCA_Deblur
S13	S13	49798	49767	0	49767	BLCA_Deblur
S14	S14	46353	46336	0	46336	BLCA_Deblur
S15	S15	74813	74787	0	74787	BLCA_Deblur
S16	S16	37246	37234	0	37234	BLCA_Deblur
S17	S17	44516	44505	0	44504	BLCA_Deblur
S18	S18	44652	44640	0	44640	BLCA_Deblur
S19	S19	65394	65382	0	65382	BLCA_Deblur
S20	S20	59454	59422	0	59420	BLCA_Deblur
S21	S21	74508	74490	0	74490	BLCA_Deblur
S22	S22	51904	51882	0	51882	BLCA_Deblur
S23	S23	46157	46133	0	46133	BLCA_Deblur
S24	S24	41830	41813	0	41813	BLCA_Deblur
S25	S25	56779	56760	0	56760	BLCA_Deblur
S26	S26	87860	87822	0	87822	BLCA_Deblur
S27	S27	60707	60626	11	60615	BLCA_Deblur
S28	S28	60799	60784	0	60784	BLCA_Deblur
S29	S29	71776	71758	0	71758	BLCA_Deblur
S30	S30	62436	62422	0	62422	BLCA_Deblur
S31	S31	27990	27976	0	27976	BLCA_Deblur
S32	S32	52615	52605	0	52605	BLCA_Deblur
S33	S33	54790	54784	0	54784	BLCA_Deblur
S34	S34	90142	90106	0	90106	BLCA_Deblur
S35	S35	73711	73696	0	73696	BLCA_Deblur
S36	S36	69883	69867	0	69867	BLCA_Deblur
S37	S37	44981	44958	0	44958	BLCA_Deblur
S38	S38	55853	55847	0	55847	BLCA_Deblur
S39	S39	45604	45583	0	45583	BLCA_Deblur
S40	S40	35733	35717	0	35717	BLCA_Deblur
S41	S41	36789	36770	0	36770	BLCA_Deblur
S42	S42	45243	45226	0	45226	BLCA_Deblur
S43	S43	74836	74818	0	74818	BLCA_Deblur
S44	S44	39181	39174	0	39174	BLCA_Deblur
S45	S45	43039	43019	0	43019	BLCA_Deblur
S46	S46	53420	53296	11	53285	BLCA_Deblur
S47	S47	49593	49578	0	49578	BLCA_Deblur
S48	S48	48873	48767	0	48767	BLCA_Deblur
S49	S49	63489	63474	0	63474	BLCA_Deblur
S50	S50	78129	78114	0	78114	BLCA_Deblur
S51	S51	58351	58332	0	58332	BLCA_Deblur
S52	S52	31498	31482	0	31482	BLCA_Deblur
S53	S53	69367	69357	0	69357	BLCA_Deblur
S54	S54	68117	68106	0	68106	BLCA_Deblur
S55	S55	78161	78152	0	78152	BLCA_Deblur
S56	S56	54943	54923	0	54923	BLCA_Deblur
S57	S57	43620	43601	0	43601	BLCA_Deblur
S58	S58	46008	45995	0	45995	BLCA_Deblur
S59	S59	24998	24980	0	24980	BLCA_Deblur
S60	S60	55438	55424	0	55424	BLCA_Deblur
S61	S61	41131	41111	0	41111	BLCA_Deblur
S62	S62	50901	50872	0	50872	BLCA_Deblur
S63	S63	50791	50765	0	50765	BLCA_Deblur
S64	S64	74386	74373	0	74373	BLCA_Deblur
S65	S65	68135	68120	0	68120	BLCA_Deblur
S66	S66	37836	37514	0	37514	BLCA_Deblur
S67	S67	47152	46991	0	46991	BLCA_Deblur
S68	S68	53147	53033	0	53033	BLCA_Deblur
S69	S69	48259	48176	0	48176	BLCA_Deblur
S70	S70	84176	84158	0	84158	BLCA_Deblur
S71	S71	40142	40128	0	40128	BLCA_Deblur
S72	S72	38792	38781	0	38781	BLCA_Deblur
S73	S73	60389	60373	0	60373	BLCA_Deblur
S74	S74	78415	78395	0	78395	BLCA_Deblur
S75	S75	54322	54306	0	54306	BLCA_Deblur
S76	S76	64240	64233	0	64233	BLCA_Deblur
S77	S77	90465	90451	0	90451	BLCA_Deblur
S78	S78	42557	42537	0	42537	BLCA_Deblur
S79	S79	43300	43285	0	43285	BLCA_Deblur
S80	S80	39178	39166	0	39166	BLCA_Deblur
S81	S81	50424	50404	0	50404	BLCA_Deblur
S82	S82	41839	41825	0	41825	BLCA_Deblur
S83	S83	39669	39658	0	39658	BLCA_Deblur
S84	S84	60351	60340	0	60340	BLCA_Deblur
S85	S85	45825	45812	0	45812	BLCA_Deblur
S86	S86	47579	47558	0	47558	BLCA_Deblur
S87	S87	23761	23747	0	23747	BLCA_Deblur
S88	S88	57584	57573	0	57463	BLCA_Deblur
S89	S89	76972	76953	0	76953	BLCA_Deblur
S90	S90	58115	58055	0	58055	BLCA_Deblur
S91	S91	46996	46984	0	46984	BLCA_Deblur
S92	S92	59653	59614	0	59614	BLCA_Deblur
S93	S93	62901	62882	0	62882	BLCA_Deblur
S94	S94	65517	65493	0	65493	BLCA_Deblur
S95	S95	54341	54259	0	54259	BLCA_Deblur

## Sheet: Collated BLCA_Deblur
Sample Name	Original reads per sample	Number of Deblur ASVs	Collated File ASVs
190-Pl2	50560	13701	13670
133-Pl2	55113	16083	16054
110-Pl2	59106	16467	16430
122-Pl2	67155	17439	17392
141-Pl2	53773	17821	17771
117-Pl2	53294	17899	17883
138-Pl2	62218	18514	18488
136-Pl2	61481	19447	19420
189-Pl2	72708	20882	20848
142-Pl2	62321	22417	22405
140-Pl2	72445	23070	23014
129-Pl2	76211	23432	23403
S87	53581	23761	23747
116-Pl2	70939	24037	24014
S59	51852	24998	24980
139-Pl2	85535	25937	25902
105-Pl2	83192	26405	26333
134-Pl2	84013	26830	26800
118-Pl2	75662	26882	26858
135-Pl2	78481	26953	26913
S09	65262	26973	26958
127-Pl2	96853	27896	27833
S31	57862	27990	27976
137-Pl2	84935	28370	28335
123-Pl2	101704	28953	28906
130-Pl2	90551	29792	29764
121-Pl2	104283	30223	30187
108-Pl2	105994	30406	30288
114-Pl2	84938	30638	30587
124-Pl2	98351	30666	30604
106-Pl2	89705	30713	30671
98-Pl2	107009	31120	31059
S52	61723	31498	31482
126-Pl2	94650	31739	31701
128-Pl2	121150	33303	33233
125-Pl2	118044	33853	33812
119-Pl2	141729	34832	34719
113-Pl2	97886	34831	34770
S40	82981	35733	35717
101-Pl2	115137	36093	36032
S41	80901	36789	36770
111-Pl2	110353	36940	36883
115-Pl2	117711	37294	37211
S16	78989	37246	37234
S66	82074	37836	37514
104-Pl2	114344	38064	37967
103-Pl2	143514	38409	38273
S72	87496	38792	38781
S80	86972	39178	39166
S44	65801	39181	39174
S02	93832	39209	39192
112-Pl2	109099	39493	39436
S83	88159	39669	39658
S12	87002	39676	39668
S04	93343	39681	39672
107-Pl2	141994	39882	39808
100-Pl2	113566	40184	40127
S71	69666	40142	40128
S61	91729	41131	41111
102-Pl2	141698	41562	41403
S05	93764	41688	41669
132-Pl2	147082	41749	41686
S24	96738	41830	41813
S82	100004	41839	41825
S78	65639	42557	42537
120-Pl2	132058	42627	42561
97-Pl2	136200	43202	42982
S45	81049	43039	43019
S79	83296	43300	43285
S57	95801	43620	43601
S06	92026	43767	43731
99-Pl2	133897	44386	44239
S17	101156	44516	44505
S18	103783	44652	44640
S37	92936	44981	44958
S01	110738	45217	45199
S42	98035	45243	45226
S39	110016	45604	45583
S85	102020	45825	45812
S58	92077	46008	45995
S23	113096	46157	46133
S14	90801	46353	46336
S91	86107	46996	46984
S67	105461	47152	46991
S86	102252	47579	47558
S08	113271	47944	47912
S69	88206	48259	48176
S48	96270	48873	48767
S11	112072	49150	49129
S47	88893	49593	49578
S07	115228	49673	49643
S13	104511	49798	49767
S81	114748	50424	50404
S63	104867	50791	50765
S62	111436	50901	50872
S10	121669	51683	51662
S22	115579	51904	51882
S32	93403	52615	52605
S68	100019	53147	53033
S46	108617	53420	53296
S03	117438	53410	53392
131-Pl2	155027	53806	53760
S95	103089	54341	54259
S75	91511	54322	54306
S33	84487	54790	54784
S56	108838	54943	54923
S60	122937	55438	55424
S38	100441	55853	55847
S25	117466	56779	56760
S88	106183	57584	57573
S90	106769	58115	58055
S51	124070	58351	58332
S20	113960	59454	59422
S92	114308	59653	59614
109-Pl2	165289	59897	59820
S84	123188	60351	60340
S73	138862	60389	60373
S27	117354	60707	60626
S28	114918	60799	60784
S30	124563	62436	62422
S93	116887	62901	62882
S49	125657	63489	63474
S76	109038	64240	64233
S19	114721	65394	65382
S94	105489	65517	65493
S54	111701	68117	68106
S65	109329	68135	68120
S53	113490	69367	69357
S36	127803	69883	69867
S29	140353	71776	71758
S35	125765	73711	73696
S64	113757	74386	74373
S21	137269	74508	74490
S15	168390	74813	74787
S43	121581	74836	74818
S89	132214	76972	76953
S50	148917	78129	78114
S55	142621	78161	78152
S74	133746	78415	78395
S70	148472	84176	84158
S26	189535	87860	87822
S34	156612	90142	90106
S77	143169	90465	90451

## Sheet: Procruste and Mantel
	Region	Procrustes	Significant	Mantel	Significant
NBC_Dada2	V3-V4	0.1798	0.308	0.255708	0.0001
NBC_Dada2	V4	0.5227	0.001	0.385567	0.0001
NBC_Deblur	V3-V4	0.2237	0.414	0.0983737	0.0495
NBC_Deblur	V4	0.6354	0.001	0.479948	0.0001
BLCA_Dada2	V3-V4	0.5276	0.001	0.877259	0.0001
BLCA_Dada2	V4	0.8741	0.001	0.994833	0.0001
BLCA_Deblur	V3-V4	0.7097	0.001	0.998239	0.0001
BLCA_Deblur	V4	0.9144	0.001	0.994251	0.0001
