# Supplementary material
Source: Research Square preprint supplement (doi:10.21203/rs.3.rs-8280185/v1)
Supplement: Supplementary file 5 [file f043115cc1c7c1dadd102b32.xlsx]

## Sheet: abund_table
	Taxa_1	Taxa_2	Taxa_3	Taxa_4	Taxa_5	Taxa_6	Taxa_7	Taxa_8	Taxa_9	Taxa_10	Taxa_11	Taxa_12	Taxa_13	Taxa_14	Taxa_15	Taxa_16	Taxa_17	Taxa_18	Taxa_19	Taxa_20	Taxa_21	Taxa_22	Taxa_23	Taxa_24	Taxa_25	Taxa_26	Taxa_27	Taxa_28	Taxa_29	Taxa_30	Taxa_31	Taxa_32	Taxa_33	Taxa_36	Taxa_37	Taxa_38	Taxa_39	Taxa_40	Taxa_42	Taxa_44	Taxa_45	Taxa_46	Taxa_47	Taxa_48	Taxa_49	Taxa_51	Taxa_53	Taxa_56	Taxa_57
140-Pl2	12410	560	2097	2330	1655	293	800	298	777	258	124	99	198	41	163	320	165	54	25	43	5	3	12	3	2	2	2	2	6	2	2	6	1	1	2	1	1	2	4	2	1	2	1	1	1	1	1	1	1
109-Pl2	5	0	0	46362	0	0	1	734	1	552	1030	2106	6099	0	1	100	1	0	2	0	0	0	0	0	0	0	0	0	0	0	0	0	0	0	0	0	0	1	0	0	0	0	0	0	0	0	0	2	0
120-Pl2	28	1	1	1019	0	0	3	55	6	15	6193	13238	11	1	1	4977	6	0	15003	1	1	0	2	0	1	0	0	0	0	0	0	0	0	0	0	0	0	0	0	0	0	0	0	0	0	0	0	0	0
116-Pl2	10718	1714	8262	368	1	960	54	215	9	278	326	520	178	12	10	127	4	0	13	12	21	0	25	0	0	0	0	0	0	0	0	0	1	0	1	0	0	0	1	0	0	0	0	0	1	0	0	0	0
135-Pl2	17791	391	1743	480	1	251	1361	443	0	1035	192	529	1100	247	479	46	104	14	7	2	6	0	6	0	0	0	0	0	0	0	0	7	0	0	1	1	0	2	0	3	0	0	0	0	0	1	0	0	0
113-Pl2	3	1935	11026	1507	0	1309	9	1754	0	4212	0	59	0	26	43	3733	122	0	1	0	336	0	913	0	0	0	0	0	1	0	0	0	0	0	2	0	0	0	0	0	0	1	0	0	0	0	0	0	0
134-Pl2	675	1	18	4405	0	0	15	8	3	58	4229	7766	10	0	1	2381	452	1	4988	2	0	2	1	0	0	0	0	0	0	0	0	0	0	0	1	0	0	0	0	0	0	0	0	0	0	0	0	0	0
121-Pl2	5	1	1	10691	0	0	5	53	0	181	682	1707	1851	0	1	23	61	0	18	0	0	0	3	0	0	0	0	0	0	0	0	0	0	0	0	0	0	5	0	0	0	0	0	0	0	0	0	5	0
99-Pl2	19537	207	1586	397	0	141	9	12	0	36	2635	7785	2026	1853	4789	8	20	0	757	0	0	0	1	0	0	0	0	0	1	0	0	6	1	3	0	1	0	1	0	0	0	0	0	0	0	0	0	2	0
128-Pl2	21	0	0	625	2109	0	771	111	0	192	2	2	7	0	3	192	1	4	10075	15	0	0	0	0	0	0	0	0	0	0	0	0	0	0	0	0	0	0	0	0	0	0	0	0	0	0	0	1	0
110-Pl2	11	0	0	1616	0	0	4	7	3	1	988	2870	7	0	0	1020	2418	0	3800	0	0	0	1	0	0	0	0	0	0	0	0	0	0	0	4	0	0	0	0	0	0	0	0	0	0	0	0	0	0
126-Pl2	38	2265	11288	2088	0	1651	5	133	0	413	143	416	9	556	1280	580	24	0	341	3	2352	0	7212	0	0	0	0	0	0	0	0	1	0	0	0	0	0	0	1	1	0	0	0	0	0	0	0	0	0
136-Pl2	41	231	1120	3884	4853	109	7	15	711	41	214	364	2	1804	3934	740	326	25	6	1	1	0	2	0	1	0	0	1	0	0	0	0	0	1	2	0	0	0	0	0	0	0	0	0	1	0	0	0	1
137-Pl2	18	1	0	18634	2	0	5034	375	0	609	870	836	99	0	0	1413	20	3	6	1	0	0	2	0	1	0	0	0	0	0	0	0	0	0	0	0	0	1	0	0	0	0	0	0	0	0	0	0	0
101-Pl2	3	69	322	1449	0	40	3	1	0	0	2453	6386	6	5222	13054	134	0	0	6195	0	3	0	11	0	0	0	0	0	0	0	0	0	0	0	0	0	0	0	0	0	0	0	0	0	0	1	0	0	0
189-Pl2	0	16	63	259	0	0	1	26	1	53	1908	3682	10	78	211	404	16	0	5176	0	83	0	307	0	0	0	0	0	0	0	0	0	0	2	0	0	0	0	0	0	0	0	0	0	0	0	0	0	0
139-Pl2	50	1	1	2969	0	0	4	16	4	6	4070	8977	6	5	4	1826	25	0	6371	0	1	1	15	0	0	0	0	0	0	0	0	2	0	0	0	0	0	0	0	0	0	0	0	1	0	0	0	0	0
98-Pl2	1	0	0	568	0	0	2	0	0	3	2192	5342	3	455	1141	25	0	0	8218	0	1	0	1	0	0	0	0	0	0	0	0	0	2	0	0	0	0	0	0	0	0	0	0	1	0	0	0	0	0
132-Pl2	6	0	1	1381	1	0	5	3	0	2	1620	4107	5	6103	15356	441	3459	1	85	0	1	0	0	0	0	0	0	0	0	0	0	0	0	0	5	0	1	0	0	0	0	0	0	0	0	0	0	0	0
119-Pl2	13	37	125	202	25	0	1	59	17	4	423	478	226	135	145	6994	537	0	5	0	46	0	55	0	0	0	0	0	0	0	0	0	0	2	0	0	0	0	0	0	0	0	0	1	0	0	0	0	0
100-Pl2	2	0	0	2098	1	0	8	1	1	4	1291	3314	3	7903	22770	133	15	0	55	0	1	0	1	0	0	0	0	0	0	0	0	0	0	0	0	0	0	1	0	0	0	0	0	0	0	1	0	0	0
141-Pl2	9522	370	1696	1691	1453	196	772	194	520	288	67	83	148	62	96	177	92	57	12	40	1	0	8	0	0	2	1	0	0	0	0	2	0	0	0	1	0	0	1	0	0	0	0	0	0	0	0	0	0
117-Pl2	74	365	2009	9662	1669	276	2	194	1972	474	27	43	3	82	184	479	16	0	11	3	5	0	14	0	0	2	0	0	0	0	0	0	0	0	0	0	0	0	0	0	0	2	0	0	0	0	0	0	0
106-Pl2	2	1294	6070	1928	0	798	5	545	0	1633	279	667	3	531	1153	1153	0	0	2377	0	752	0	2098	0	0	0	0	0	0	0	0	0	0	0	0	0	0	0	0	1	0	0	0	0	0	0	0	0	0
118-Pl2	87	2547	12751	1801	0	1535	3	465	0	1261	9	5	0	26	208	578	9	0	113	12	999	0	3960	0	0	0	0	0	0	0	0	0	0	0	0	1	0	0	0	0	0	0	0	0	0	0	0	0	0
102-Pl2	5	0	0	15575	2	0	349	62	0	207	1682	4563	3331	0	2	645	0	0	1115	0	1	0	0	0	0	0	0	0	4	0	0	0	0	9	0	0	0	2	0	0	0	0	0	0	1	0	1	3	1
138-Pl2	4	1	0	95	1	0	2955	7	2	3	2	10	1	0	2	78	1064	0	1912	56	0	0	0	0	0	0	0	0	0	0	0	0	0	0	0	0	0	0	0	0	1	0	0	0	0	0	0	0	0
107-Pl2	8	147	602	1720	0	58	2	34	0	140	1371	3636	7	4951	14375	462	2331	0	483	0	34	0	131	0	0	0	0	0	0	0	0	0	0	0	14	0	0	0	0	0	0	0	1	0	0	0	0	0	0
124-Pl2	22449	338	1530	317	5	221	11	9	0	22	762	1838	665	383	799	6	492	0	30	0	1	0	4	0	0	0	0	0	0	0	1	6	0	4	5	0	0	0	0	1	0	0	0	0	0	0	0	0	1
111-Pl2	26134	982	5009	462	0	690	69	132	9	277	64	91	449	23	89	25	1019	0	5	3	0	2	2	0	0	0	0	0	0	0	0	2	1	2	2	0	0	1	1	0	0	0	0	0	1	0	0	0	1
129-Pl2	48	0	0	2065	0	0	4	1	1	6	3721	8840	8	2	3	1287	18	0	6542	0	0	2	0	0	0	0	0	0	0	0	0	1	0	0	0	0	0	0	0	0	0	0	0	1	0	0	0	0	0
123-Pl2	8	0	0	6886	0	0	6	0	0	2	2330	5142	6	880	2014	27	12	0	4963	0	0	3	2	0	0	0	0	0	0	0	0	0	0	0	0	0	0	0	1	1	0	0	0	0	0	0	0	0	0
112-Pl2	7	465	1868	21147	3238	1	7	108	2154	275	129	278	3	2358	4879	721	671	0	5	0	2	0	0	0	0	0	0	0	0	0	2	0	0	0	2	0	0	0	0	0	0	0	1	0	0	0	0	0	0
114-Pl2	7	1	5	25769	0	0	0	300	1	768	35	141	2177	0	1	94	2	3	2	1	1	0	2	0	0	0	0	0	0	0	0	0	0	0	0	0	0	0	0	0	0	0	0	0	2	0	0	0	0
130-Pl2	21592	838	4144	242	0	583	40	48	0	105	223	596	546	48	136	26	13	0	146	0	0	1	3	0	0	0	0	0	0	0	0	0	0	2	2	0	0	0	0	0	0	0	0	0	0	0	0	1	0
105-Pl2	10180	151	783	1749	203	107	307	87	0	230	753	1671	114	2423	6283	365	4	6	64	0	1	0	3	0	0	0	0	0	2	0	0	2	0	4	0	0	0	2	0	0	0	0	0	0	1	0	0	0	0
190-Pl2	2	30	61	181	0	0	0	39	0	44	964	956	4	68	97	298	102	0	3145	0	67	0	174	0	0	0	0	0	0	0	0	0	0	1	0	0	0	0	0	0	0	0	0	0	0	0	0	0	0
127-Pl2	2	1	3	9525	0	0	2	75	0	143	753	1763	1719	0	1	29	46	0	15	0	0	0	0	0	0	0	0	0	0	0	0	0	1	0	1	0	0	0	0	0	0	0	0	0	0	0	0	5	1
108-Pl2	243	3	12	1093	27	0	2	451	0	5	3142	3960	5	1059	1279	66	2606	15	9173	0	14	0	8	0	0	0	0	0	0	0	0	0	0	0	0	0	0	0	1	0	0	0	0	0	1	0	0	0	1
104-Pl2	11	0	0	5264	0	0	8	15	1	10	4239	10638	3	3	7	1488	1	0	14918	0	0	0	2	0	0	0	0	0	0	0	0	0	0	2	0	0	0	0	0	0	0	0	0	0	0	0	0	0	0
103-Pl2	43	0	0	175	7	0	1568	0	0	41	0	12	9	6	45	105	0	0	10705	3	1	1	0	0	0	0	0	0	1	0	0	2	1	0	0	0	0	0	0	0	1	0	0	0	0	0	0	0	0
131-Pl2	7	392	2121	22520	776	287	5	44	27	108	303	692	1	6494	16702	730	155	1	19	0	0	0	3	0	0	0	0	0	1	0	0	1	0	0	0	0	0	0	0	0	0	0	0	0	1	0	0	0	0
133-Pl2	7	0	1	47	0	0	931	5	0	8	0	2	4	0	0	58	10	0	4718	14	0	0	0	0	0	0	0	0	2	0	0	0	0	0	0	0	0	0	0	0	0	0	0	0	0	0	0	0	0
125-Pl2	10	0	8	1460	1	0	3	1	0	2	1203	2995	6	5267	13766	414	1562	0	141	1	0	4	3	0	0	0	0	0	0	0	0	0	0	0	3	0	0	0	0	1	0	0	0	0	0	0	0	0	2
115-Pl2	19	1	2	6486	0	0	92	8	8	28	3990	8791	0	0	1	6328	0	3	10495	4	0	0	0	0	0	0	0	0	0	0	0	0	0	0	0	0	0	0	0	0	0	0	0	0	0	0	0	0	0
122-Pl2	0	0	1	213	0	1	11	0	0	2	104	265	4	1	4	1	4600	0	7176	0	0	1	0	0	0	0	0	0	0	0	0	0	0	0	9	0	0	1	0	0	0	0	0	0	0	0	0	0	1
97-Pl2	4	2	1	224	6	0	14	2	0	12	2	133	6	3	4	11	0	0	30025	0	2	0	3	0	0	0	0	0	0	0	0	0	0	0	0	1	0	0	0	0	0	0	0	0	0	0	0	0	0
142-Pl2	79	2727	12383	1709	0	1657	35	507	0	1085	6	7	6	45	102	804	1	0	117	4	159	0	419	0	0	0	0	0	0	0	0	0	0	0	0	0	0	0	0	0	0	0	0	0	0	0	0	0	0
S76	0	0	0	4	0	0	2	0	0	319	1	0	1	0	3	0	0	0	0	0	1	0	0	0	0	0	0	0	0	0	0	0	0	0	0	0	0	0	0	0	0	0	0	0	0	0	0	0	1
S94	1	0	0	1	0	0	19	1	0	15	2	0	0	0	8	2	0	0	1	0	0	0	0	0	0	0	0	0	17	0	0	0	0	1	0	0	0	0	0	0	0	0	0	0	0	0	0	0	1
S68	2	0	0	20	0	0	2	0	0	49	0	365	1	0	4	4	1	0	0	0	2	0	0	0	0	0	0	0	1	0	0	0	0	11	0	1	0	0	0	0	0	0	0	0	0	0	0	2	1
S77	0	0	0	3	0	0	1	0	0	408	0	1	2	0	1	1	0	0	0	0	1	0	0	0	0	0	0	0	0	0	0	0	0	0	0	2	0	0	0	0	0	0	0	0	0	0	0	6	0
S63	1	0	0	1954	0	0	7	4	0	2881	0	0	6	0	15	4	339	0	0	0	0	0	0	0	0	0	2	0	0	0	0	0	0	0	0	0	0	0	0	0	0	0	0	0	0	0	0	0	2
S55	0	0	0	47	0	0	2	1	0	442	0	1	0	0	7	14	2	0	0	0	0	0	0	0	0	0	0	0	0	0	0	0	0	0	0	1	0	0	0	0	0	0	0	0	0	0	0	0	2
S13	0	0	0	241	0	0	3	1	0	1664	0	4	8	0	63	3	0	0	0	0	1	0	0	0	0	0	0	0	0	0	0	2	0	0	0	0	0	0	0	0	0	0	0	0	0	0	0	180	3
S46	4	0	0	15	0	0	14	3	0	232	2	77	7	0	546	2	247	0	152	0	5	0	0	0	0	0	0	0	0	0	0	0	0	46	0	0	0	0	0	0	0	0	0	0	0	0	0	0	5
S12	0	0	0	81	0	0	2	1	0	474	0	0	5	0	465	4	1	0	0	0	6	0	0	0	0	0	0	0	0	0	0	0	0	1	0	0	0	0	0	0	0	0	0	0	0	0	0	0	0
S85	40	0	0	40	0	0	14	0	0	1073	3	0	1	0	5	93	0	0	0	0	2	0	0	0	0	0	0	0	1	0	0	0	0	0	0	0	0	0	0	0	0	0	0	0	0	0	0	6	0
S37	1	0	0	51	0	0	5	0	0	1679	0	0	9	0	2	8	1	0	0	0	0	0	0	0	0	1	0	0	0	0	0	0	0	0	0	1	0	0	0	0	0	0	0	0	0	0	0	0	1
S51	2	0	0	37	0	0	2	0	0	2849	0	0	8	0	0	7	1	0	0	0	0	0	0	0	0	0	0	0	0	0	0	0	0	1	0	1	0	0	0	0	0	0	0	0	0	0	0	0	0
S93	0	0	0	0	0	0	140	3	0	6	0	0	0	0	566	1	0	0	1	9	0	0	0	0	0	0	0	0	9	0	0	0	0	0	0	0	0	0	0	0	0	0	0	0	0	0	0	0	4
S16	8	0	0	90	0	0	26	0	0	274	11	0	3	0	442	2	0	0	0	0	0	0	0	0	0	0	0	0	0	0	0	0	0	6	0	0	0	0	0	0	0	0	0	0	0	0	0	0	9
S67	0	0	0	82	0	0	28	0	0	258	2	0	2	0	5	2	212	0	0	0	0	0	0	0	0	0	0	0	0	0	0	0	0	303	0	1	0	0	0	0	0	0	0	0	0	0	0	0	310
S07	0	0	0	295	0	0	4	0	0	2158	1	47	4	0	472	6	60	0	0	0	2	0	0	0	0	0	0	0	0	0	0	0	0	0	0	0	0	0	0	0	0	0	0	0	0	0	0	25	1
S47	0	0	0	11	0	0	2	1	0	41	0	0	9	0	0	5	0	0	0	0	0	0	0	0	0	0	0	0	0	0	0	0	0	47	0	0	0	0	0	0	0	0	0	0	0	0	0	0	0
S71	0	0	0	12	0	0	9	1	0	18	0	4	1	0	350	0	0	0	0	0	713	0	0	0	0	0	0	0	0	0	0	0	0	44	0	2	0	0	12	0	0	0	0	0	0	0	0	0	0
S36	0	0	0	272	0	0	16	0	0	627	2	54	9	0	176	6	2	0	0	0	0	0	0	0	0	1	0	0	0	0	0	0	0	15	0	0	0	0	0	0	0	0	0	0	0	0	0	0	2
S92	0	0	0	0	0	0	88	0	0	14	0	1	4	0	783	0	0	0	0	0	0	0	0	0	0	0	0	0	0	0	0	0	0	0	0	0	0	0	0	0	39	0	0	0	0	0	0	0	3
S59	1	0	0	16	0	0	30	0	0	7	1	533	1	0	855	0	4	0	0	0	7	0	0	0	0	0	0	0	0	0	0	1	0	2	0	0	0	0	11	0	0	0	0	0	0	0	0	0	0
S95	0	0	0	1	0	0	35	1	0	9	1	0	5	0	256	4	0	0	0	9	0	0	0	0	0	0	0	0	0	0	0	0	0	0	0	1	0	0	0	0	0	0	0	0	0	0	0	2	2
S21	0	0	0	68	0	0	2	0	0	171	0	0	0	0	1	4	2	0	0	0	0	0	0	0	0	1	0	0	0	0	0	0	0	1	0	0	0	0	0	0	0	0	0	0	0	0	0	0	3
S28	0	0	0	51	0	0	11	1	0	81	0	8	2	0	66	2	0	0	2	0	0	0	0	0	0	0	0	0	0	0	0	0	0	281	0	0	0	0	2	0	1	0	0	0	0	0	0	0	193
S05	1	0	0	188	0	0	37	0	0	410	0	70	8	0	244	2	70	0	0	0	0	0	0	0	0	0	0	0	0	0	0	3	0	6	0	0	0	0	0	0	0	0	0	0	0	0	0	15	0
S27	4	0	0	46	0	0	44	1	0	105	0	3	0	0	587	4	1	0	0	0	0	0	0	0	0	0	0	0	0	0	0	0	0	208	0	0	0	0	0	0	0	0	0	0	0	0	0	30	68
S44	0	0	0	12	0	0	0	0	0	37	0	0	0	0	1	1	0	0	2	0	0	0	0	0	0	0	0	0	0	0	0	0	0	0	0	0	0	0	0	0	0	0	0	0	0	0	0	4	0
S70	1	0	0	4	0	0	3	0	0	39	0	1	0	0	75	0	0	0	0	0	1290	0	0	0	0	0	0	0	0	0	0	0	0	0	0	0	0	0	0	0	0	0	0	0	0	0	0	0	0
S86	0	0	0	936	0	0	9	0	0	7283	0	0	1	0	25	1	1165	0	0	0	1	0	0	0	0	1	0	0	0	0	0	0	0	0	0	0	0	0	0	0	0	0	0	0	0	0	0	10	179
S53	0	0	0	1	0	0	1	0	0	54	0	0	0	0	39	0	0	0	0	0	113	0	0	0	0	0	0	0	0	0	0	0	0	0	0	0	0	0	0	0	0	0	0	0	0	0	0	0	0
S61	77	0	0	6	0	0	7	1	0	768	0	0	2	0	1	3	0	0	0	0	0	0	0	0	0	0	0	0	0	0	0	0	0	0	0	1	0	0	0	0	0	0	0	0	0	0	0	4	6
S32	1	0	0	22	0	0	1	2	0	126	1	1	1	0	1	0	2	0	0	0	0	0	0	0	0	2	0	0	0	0	0	0	0	21	0	0	0	0	0	0	0	0	0	0	0	0	0	0	3
S84	29	0	0	14	0	0	5	1	0	1157	0	0	4	0	3	5	0	0	0	0	0	0	0	0	0	0	0	0	0	0	0	0	0	0	0	0	0	0	0	0	0	0	0	0	0	0	0	20	0
S62	1	0	0	0	0	0	9	0	0	5319	0	0	2	0	16	2	806	0	41	0	1	0	0	0	0	0	0	0	1	0	0	0	0	1	0	0	0	0	0	0	0	0	0	0	0	0	0	0	97
S40	0	0	0	208	0	0	4	0	0	430	3	1	4	0	4	3	1	0	0	0	1	0	0	0	0	0	1	0	0	0	0	0	0	0	0	0	0	0	0	0	0	0	0	0	0	0	0	0	2
S52	0	0	0	14	0	1	0	0	0	1788	0	0	7	0	1	4	0	0	0	0	0	0	0	0	0	0	0	0	0	0	0	0	0	1	0	0	0	0	0	0	0	0	0	0	0	0	0	0	0
S20	0	0	0	58	0	0	55	0	0	143	1	0	1	0	292	4	7	0	0	0	1	0	0	0	0	0	0	0	0	0	0	2	0	13	0	0	0	0	0	0	0	0	0	0	0	0	0	2	5
S45	0	0	0	18	0	0	21	0	0	57	10	10	1	0	182	1	1	0	0	0	0	0	0	0	0	0	0	0	6	0	0	0	0	224	0	0	0	0	0	0	0	0	0	0	0	0	0	2	19
S15	0	0	0	274	0	0	29	0	0	2195	5	2	12	0	478	4	0	0	0	0	0	0	0	0	0	0	1	0	0	0	0	2	0	9	0	0	0	0	2	0	0	0	0	0	0	0	0	172	3
S04	4	0	0	69	0	0	9	3	0	299	1	0	4	0	3	11	0	0	0	0	0	0	0	0	0	0	0	0	0	0	0	0	0	1	0	0	0	0	0	0	0	0	0	0	0	0	0	0	0
S24	0	0	0	96	0	0	4	0	0	508	1	1	9	0	511	7	0	0	0	0	0	0	0	0	0	1	0	0	0	0	0	0	0	0	0	0	1	0	0	0	0	0	0	0	0	0	0	2	0
S54	0	0	0	6	0	0	0	0	0	378	0	0	3	0	5	5	0	0	0	0	3	0	0	0	0	0	0	0	0	0	0	0	0	0	0	0	0	0	0	0	0	0	0	0	0	0	0	2	1
S30	0	0	0	92	0	0	5	1	0	1055	0	0	2	0	3	3	0	0	0	0	0	0	0	0	0	0	0	0	0	0	0	0	0	6	0	0	0	0	0	0	0	0	0	0	0	0	0	0	1
S60	76	0	0	9	0	0	5	0	0	911	0	1	7	0	9	1	2	0	1	0	0	0	0	0	0	0	0	0	0	0	0	0	0	0	0	0	0	0	0	0	0	0	0	0	0	0	0	19	5
S69	0	0	0	9	0	0	43	1	0	59	0	15	6	0	337	0	0	0	0	0	0	0	0	0	1	0	0	0	0	0	0	0	0	17	0	0	0	0	2	0	0	0	0	0	0	0	0	7	0
S22	0	0	0	26	0	0	14	0	0	303	4	70	5	0	451	8	9	0	0	0	2	0	0	0	0	0	0	0	0	0	0	2	0	4	0	0	0	0	9	0	0	0	0	0	0	0	0	0	0
S29	0	0	0	59	0	0	8	1	0	390	1	0	0	0	1	7	3	0	0	0	0	0	0	0	0	2	0	0	0	0	0	0	0	0	0	0	0	0	0	0	0	0	0	0	0	0	0	0	1
S06	0	0	0	225	0	0	18	0	0	348	0	107	2	0	556	2	40	0	0	0	0	0	0	0	0	0	0	0	0	0	0	4	0	44	0	0	0	0	0	0	0	0	0	0	0	0	0	9	5
S14	0	0	0	249	0	0	2	2	0	1600	5	0	5	0	65	2	32	0	0	0	1	0	0	0	0	0	0	0	0	0	0	0	0	1	0	0	0	0	0	0	0	0	0	0	0	0	0	177	0
S35	0	0	0	2	0	0	0	0	0	373	0	0	0	0	6	0	2	0	0	0	0	0	0	0	0	0	0	0	0	0	0	1	0	0	0	0	0	0	0	0	0	0	0	0	0	0	0	0	0
S91	0	0	0	0	0	0	44	0	0	7	0	1	2	0	116	4	4	0	0	0	0	0	0	0	0	0	0	0	0	0	0	0	0	2	0	0	0	0	0	0	0	0	0	0	0	0	0	0	6
S79	1	0	0	37	0	0	4	0	0	226	1	0	2	0	2	66	1	0	0	0	1	0	0	0	0	1	0	0	0	0	0	0	0	0	0	1	0	0	0	0	0	0	0	0	0	0	0	0	0
S11	0	0	0	130	0	0	3	1	0	543	1	0	1	0	401	2	0	0	1	0	4	0	0	0	0	3	0	0	0	0	0	0	0	0	0	0	0	0	0	0	0	0	0	0	0	0	0	0	0
S38	0	0	0	33	0	0	5	0	0	29	4	0	2	0	508	0	0	0	0	0	0	0	0	0	0	1	0	0	0	0	0	0	0	1	0	0	0	0	0	0	0	0	0	0	0	0	0	0	0
S19	6	0	0	151	7	0	29	0	0	169	17	0	0	0	501	2	1	0	0	0	0	0	0	0	0	3	0	0	0	0	0	5	0	17	0	0	0	0	0	0	0	0	0	0	0	0	0	9	11
S03	5	0	0	393	0	0	24	3	0	190	10	74	1	0	293	1	63	0	0	0	0	0	0	0	0	0	0	0	0	0	0	1	0	1	0	0	0	0	0	0	0	0	0	0	0	0	0	40	0
S78	1	0	0	67	0	0	29	0	0	315	0	46	0	0	432	0	0	0	0	0	0	0	0	0	0	0	0	0	0	0	0	1	0	27	0	0	0	0	1	0	0	0	0	0	0	0	0	3	1
S08	1	0	0	200	0	0	32	1	0	1516	0	63	0	0	560	3	31	0	0	0	8	0	0	0	0	0	1	0	0	0	0	0	0	15	0	0	0	0	0	0	0	0	0	0	0	0	0	0	20
S31	1	0	0	47	0	0	20	0	0	342	1	3	6	0	254	1	0	0	0	0	0	0	0	0	0	0	0	0	0	0	0	0	0	26	0	0	0	0	1	0	0	0	0	0	0	0	0	0	1
S75	0	0	0	4	0	0	0	0	0	305	0	0	1	0	28	3	0	0	0	0	59	0	0	0	0	0	0	0	0	0	0	0	0	0	0	0	0	0	0	0	0	0	0	0	0	0	0	0	2
S87	0	0	0	212	0	0	7	4	0	3502	4	0	4	0	0	5	225	0	1	0	0	0	0	0	0	0	0	0	0	0	0	0	0	0	0	0	0	0	0	0	0	0	0	0	0	0	0	0	50
S43	0	0	0	34	0	0	0	0	0	150	0	0	1	0	1	2	0	0	8	0	0	0	0	0	0	0	0	0	0	0	0	0	0	0	0	0	0	0	0	0	0	0	0	0	0	0	0	10	0
S83	1	0	0	5	0	0	0	0	0	13	2	5915	0	0	702	401	0	0	0	0	0	1	0	0	0	0	0	0	0	0	0	0	0	0	0	0	0	0	0	0	0	0	0	0	0	0	0	0	6
S39	0	0	0	145	0	0	6	0	0	298	0	0	8	0	14	6	0	0	0	0	0	0	0	0	0	0	0	0	0	0	0	0	0	1	0	0	0	0	0	0	0	0	0	0	0	0	0	0	0
S23	1	0	0	57	0	0	2	2	0	648	0	1	2	0	208	10	1	0	0	0	2	0	0	0	0	0	0	0	0	0	0	0	0	1	0	1	0	0	0	0	0	0	0	0	0	0	0	0	0
[truncated: 2,187 more columns]

## Sheet: taxonomy
	Kingdom	Phylum	Class	Order	Family	Genus	Otus
Taxa_1	Bacteria	Proteobacteria	Gammaproteobacteria	Oceanospirillales	Halomonadaceae	Halomonas	Halomonas_sp.
Taxa_2	Bacteria	Proteobacteria	Alphaproteobacteria	Rhodobacterales	Rhodobacteraceae	Celeribacter	uncultured_Alphaproteobacteria
Taxa_3	Bacteria	Proteobacteria	Alphaproteobacteria	Rhodobacterales	Rhodobacteraceae	Celeribacter	Celeribacter_baekdonensis
Taxa_4	Bacteria	Proteobacteria	Alphaproteobacteria	Rhodobacterales	Rhodobacteraceae	Sulfitobacter	Sulfitobacter_sp.
Taxa_5	Bacteria	Proteobacteria	Alphaproteobacteria	Rhodobacterales	Rhodobacteraceae	Aliiroseovarius	uncultured_bacterium
Taxa_6	Bacteria	Proteobacteria	Alphaproteobacteria	Rhodobacterales	Rhodobacteraceae	Celeribacter	uncultured_bacterium
Taxa_7	Bacteria	Proteobacteria	Alphaproteobacteria	Rhodobacterales	Rhodobacteraceae	uncultured	uncultured_bacterium
Taxa_8	Bacteria	Proteobacteria	Alphaproteobacteria	Caulobacterales	Hyphomonadaceae	uncultured	uncultured_bacterium
Taxa_9	Bacteria	Proteobacteria	Alphaproteobacteria	Caulobacterales	Hyphomonadaceae	Oceanicaulis	Oceanicaulis_alexandrii
Taxa_10	Bacteria	Proteobacteria	Alphaproteobacteria	Caulobacterales	Hyphomonadaceae	Hyphomonas	uncultured_bacterium
Taxa_11	Bacteria	Proteobacteria	Gammaproteobacteria	Alteromonadales	Pseudoalteromonadaceae	Pseudoalteromonas	uncultured_marine
Taxa_12	Bacteria	Proteobacteria	Gammaproteobacteria	Alteromonadales	Pseudoalteromonadaceae	Pseudoalteromonas	Pseudoalteromonas_sp.
Taxa_13	Bacteria	Proteobacteria	Gammaproteobacteria	Alteromonadales	Alteromonadaceae	Alteromonas	uncultured_bacterium
Taxa_14	Bacteria	Proteobacteria	Gammaproteobacteria	Vibrionales	Vibrionaceae	Vibrio	uncultured_Vibrio
Taxa_15	Bacteria	Proteobacteria	Gammaproteobacteria	Vibrionales	Vibrionaceae	Vibrio	Vibrio_sp.
Taxa_16	Bacteria	Proteobacteria	Alphaproteobacteria	Rhodospirillales	Thalassospiraceae	Thalassospira	uncultured_bacterium
Taxa_17	Bacteria	Proteobacteria	Gammaproteobacteria	Methylococcales	Cycloclasticaceae	Cycloclasticus	uncultured_bacterium
Taxa_18	Bacteria	Bacteroidota	Bacteroidia	Flavobacteriales	Flavobacteriaceae	Eudoraea	uncultured_bacterium
Taxa_19	Bacteria	Proteobacteria	Gammaproteobacteria	Alteromonadales	Alteromonadaceae	Alteromonas	Alteromonas_sp.
Taxa_20	Bacteria	Proteobacteria	Alphaproteobacteria	Micavibrionales	Micavibrionaceae	uncultured	uncultured_bacterium
Taxa_21	Bacteria	Bacteroidota	Bacteroidia	Flavobacteriales	Flavobacteriaceae	Mesonia	Mesonia_algae
Taxa_22	Bacteria	Proteobacteria	Gammaproteobacteria	Enterobacterales	Enterobacteriaceae	Escherichia-Shigella	Escherichia_coli
Taxa_23	Bacteria	Bacteroidota	Bacteroidia	Flavobacteriales	Flavobacteriaceae	Mesonia	uncultured_bacterium
Taxa_24	Bacteria	Proteobacteria	Gammaproteobacteria	Oceanospirillales	Spongiibacteraceae	BD1-7_clade	uncultured_marine
Taxa_25	Bacteria	Proteobacteria	Gammaproteobacteria	Enterobacterales	Enterobacteriaceae	Klebsiella	Klebsiella_pneumoniae
Taxa_26	Bacteria	Proteobacteria	Alphaproteobacteria	Rhodobacterales	Rhodobacteraceae	Rhodovulum	Rhodovulum_marinum
Taxa_27	Bacteria	Proteobacteria	Gammaproteobacteria	Alteromonadales	Idiomarinaceae	Aliidiomarina	uncultured_bacterium
Taxa_28	Bacteria	Bacteroidota	Bacteroidia	Sphingobacteriales	Williamwhitmaniaceae	BCf9-17_termite_group	uncultured_Bacteroidales
Taxa_29	Bacteria	Proteobacteria	Alphaproteobacteria	Kiloniellales	Kiloniellaceae	uncultured	uncultured_bacterium
Taxa_30	Bacteria	Proteobacteria	Alphaproteobacteria	Caulobacterales	Hyphomonadaceae	Oceanicaulis	uncultured_Alphaproteobacteria
Taxa_31	Bacteria	Proteobacteria	Alphaproteobacteria	Rhodobacterales	Rhodobacteraceae	Aliiroseovarius	uncultured_Roseovarius
Taxa_32	Bacteria	Proteobacteria	Gammaproteobacteria	Oceanospirillales	Halomonadaceae	Halomonas	uncultured_Halomonas
Taxa_33	Bacteria	Proteobacteria	Gammaproteobacteria	Enterobacterales	Yersiniaceae	Serratia	Serratia_symbiotica
Taxa_36	Bacteria	Proteobacteria	Alphaproteobacteria	SAR11_clade	Clade_I	Clade_Ia	uncultured_bacterium
Taxa_37	Bacteria	Proteobacteria	Gammaproteobacteria	Burkholderiales	Chromobacteriaceae	Chromobacterium	Chromobacterium_sp.
Taxa_38	Bacteria	Proteobacteria	Alphaproteobacteria	Rhizobiales	uncultured	uncultured	uncultured_bacterium
Taxa_39	Bacteria	Proteobacteria	Gammaproteobacteria	Enterobacterales	Enterobacteriaceae	Escherichia-Shigella	uncultured_organism
Taxa_40	Bacteria	Proteobacteria	Gammaproteobacteria	Alteromonadales	Alteromonadaceae	Alteromonas	Alteromonas_mediterranea
Taxa_42	Bacteria	Proteobacteria	Alphaproteobacteria	Rhodobacterales	Rhodobacteraceae	Ascidiaceihabitans	uncultured_bacterium
Taxa_44	Bacteria	Proteobacteria	Gammaproteobacteria	Oceanospirillales	Hahellaceae	Hahella	Allohahella_antarctica
Taxa_45	Bacteria	Proteobacteria	Gammaproteobacteria	Oceanospirillales	Nitrincolaceae	Amphritea	uncultured_bacterium
Taxa_46	Bacteria	Proteobacteria	Alphaproteobacteria	Caulobacterales	Hyphomonadaceae	Oceanicaulis	uncultured_bacterium
Taxa_47	Bacteria	Proteobacteria	Alphaproteobacteria	SAR86_clade	SAR86_clade	SAR86_clade	uncultured_bacterium
Taxa_48	Bacteria	Proteobacteria	Gammaproteobacteria	Alteromonadales	Alteromonadaceae	Agaribacter	Alteromonas_sp.
Taxa_49	Bacteria	Bacteroidota	Bacteroidia	Flavobacteriales	Flavobacteriaceae	Leeuwenhoekiella	uncultured_bacterium
Taxa_51	Bacteria	Proteobacteria	Gammaproteobacteria	Vibrionales	Vibrionaceae	Vibrio	Vibrio_toranzoniae
Taxa_53	Bacteria	Proteobacteria	Alphaproteobacteria	Rhodobacterales	Rhodobacteraceae	Clostridium_sensu_stricto_1	uncultured_bacterium
Taxa_56	Bacteria	Proteobacteria	Gammaproteobacteria	Alteromonadales	Alteromonadaceae	Paraglaciecola	Glaciecola_sp.
Taxa_57	Bacteria	Proteobacteria	Gammaproteobacteria	Oceanospirillales	Pseudohongiellaceae	Pseudohongiella	uncultured_bacterium
Taxa_58	Bacteria	Proteobacteria	Gammaproteobacteria	Vibrionales	Vibrionaceae	Photobacterium	uncultured_bacterium
Taxa_59	Bacteria	Proteobacteria	Gammaproteobacteria	Cellvibrionales	Spongiibacteraceae	uncultured	uncultured_bacterium
Taxa_60	Bacteria	Proteobacteria	Alphaproteobacteria	Enterobacterales	Morganellaceae	uncultured	uncultured_bacterium
Taxa_61	Bacteria	Proteobacteria	Alphaproteobacteria	Kordiimonadales	uncultured	uncultured	uncultured_bacterium
Taxa_62	Bacteria	Proteobacteria	Alphaproteobacteria	Rhodobacterales	Rhodobacteraceae	Marinicaulis	uncultured_bacterium
Taxa_63	Bacteria	Bacteroidota	Rhodothermia	Balneolales	Balneolaceae	Balneola	marine_metagenome
Taxa_65	Bacteria	Proteobacteria	Gammaproteobacteria	Alteromonadales	Alteromonadaceae	Pseudobowmanella	Pseudobowmanella_zhangzhouensis
Taxa_66	Bacteria	Proteobacteria	Gammaproteobacteria	Alteromonadales	Marinobacteraceae	Marinobacter	uncultured_Marinobacter
Taxa_67	Bacteria	Proteobacteria	Alphaproteobacteria	Rickettsiales	AB1	AB1	uncultured_bacterium
Taxa_69	Bacteria	Proteobacteria	Alphaproteobacteria	Parvibaculales	Parvibaculaceae	Parvibaculum	uncultured_bacterium
Taxa_71	Bacteria	Proteobacteria	Gammaproteobacteria	Thiotrichales	Thiotrichaceae	Cocleimonas	uncultured_gamma
Taxa_72	Bacteria	Proteobacteria	Alphaproteobacteria	Caulobacterales	Hyphomonadaceae	Oceanicaulis	Oceanicaulis_sp.
Taxa_73	Bacteria	Proteobacteria	Alphaproteobacteria	Caulobacterales	Parvularculaceae	Marinicaulis	uncultured_bacterium
Taxa_74	Bacteria	Proteobacteria	Alphaproteobacteria	Micavibrionales	Micavibrionaceae	uncultured	uncultured_organism
Taxa_77	Bacteria	Proteobacteria	Gammaproteobacteria	Alteromonadales	Alteromonadaceae	Paraglaciecola	uncultured_Glaciecola
Taxa_78	Bacteria	Proteobacteria	Gammaproteobacteria	Alteromonadales	Alteromonadaceae	Paraglaciecola	Idiomarina_zobellii
Taxa_79	Bacteria	Proteobacteria	Gammaproteobacteria	Alteromonadales	Alteromonadaceae	Paraglaciecola	uncultured_bacterium
Taxa_80	Bacteria	Bacteroidota	Bacteroidia	Flavobacteriales	Flavobacteriaceae	uncultured	uncultured_Sediminibacter
Taxa_81	Bacteria	Bacteroidota	Bacteroidia	Flavobacteriales	Flavobacteriaceae	Croceibacter	uncultured_bacterium
Taxa_82	Bacteria	Proteobacteria	Alphaproteobacteria	Sphingomonadales	Sphingomonadaceae	Erythrobacter	uncultured_Erythrobacter
Taxa_83	Bacteria	Proteobacteria	Alphaproteobacteria	Sphingomonadales	Sphingomonadaceae	Erythrobacter	uncultured_bacterium
Taxa_84	Bacteria	Bacteroidota	Bacteroidia	Flavobacteriales	Flavobacteriaceae	Polaribacter	uncultured_bacterium
Taxa_85	Bacteria	Proteobacteria	Gammaproteobacteria	Aeromonadales	Aeromonadaceae	Aeromonas	Microbulbifer_sp.
Taxa_86	Bacteria	Proteobacteria	Gammaproteobacteria	Aeromonadales	Aeromonadaceae	Aeromonas	Aeromonas_sp.
Taxa_87	Bacteria	Bacteroidota	Bacteroidia	Flavobacteriales	Flavobacteriaceae	Maribacter	Maribacter_sp.
Taxa_88	Bacteria	Proteobacteria	Gammaproteobacteria	Alteromonadales	Shewanellaceae	Shewanella	Shewanella_fidelis
Taxa_89	Bacteria	Proteobacteria	Gammaproteobacteria	Alteromonadales	Alteromonadaceae	Aestuariibacter	uncultured_bacterium
Taxa_90	Bacteria	Actinobacteriota	Actinobacteria	Corynebacteriales	Mycobacteriaceae	Mycobacterium	uncultured_bacterium
Taxa_91	Bacteria	Bacteroidota	Bacteroidia	Flavobacteriales	Flavobacteriaceae	Pseudofulvibacter	uncultured_bacterium
Taxa_92	Bacteria	Proteobacteria	Gammaproteobacteria	Pseudomonadales	Moraxellaceae	Acinetobacter	uncultured_bacterium
Taxa_93	Bacteria	Proteobacteria	Gammaproteobacteria	Alteromonadales	Alteromonadaceae	Alteromonas	Idiomarina_zobellii
Taxa_94	Bacteria	Proteobacteria	Gammaproteobacteria	Alteromonadales	Pseudoalteromonadaceae	Pseudoalteromonas	uncultured_Pseudoalteromonas
Taxa_96	Bacteria	Proteobacteria	Gammaproteobacteria	Nitrosococcales	Methylophagaceae	Methylophaga	uncultured_bacterium
Taxa_98	Bacteria	Proteobacteria	Gammaproteobacteria	Alteromonadales	Shewanellaceae	Psychrobium	uncultured_Sulfitobacter
Taxa_101	Bacteria	Proteobacteria	Gammaproteobacteria	Alteromonadales	Alteromonadaceae	Glaciecola	Glaciecola_sp.
Taxa_102	Bacteria	Proteobacteria	Gammaproteobacteria	Alteromonadales	Psychromonadaceae	Agarivorans	Aliagarivorans_sp.
Taxa_103	Bacteria	Proteobacteria	Alphaproteobacteria	Rhodobacterales	Rhodobacteraceae	Paracoccus	uncultured_Alphaproteobacteria
Taxa_104	Bacteria	Proteobacteria	Gammaproteobacteria	Aeromonadales	Aeromonadaceae	Microbulbifer	Microbulbifer_sp.
Taxa_105	Bacteria	Proteobacteria	Gammaproteobacteria	Alteromonadales	Alteromonadaceae	Salinimonas	Salinimonas_sp.
Taxa_106	Bacteria	Proteobacteria	Gammaproteobacteria	Enterobacterales	Pectobacteriaceae	Sodalis	Sitophilus_zeamais
Taxa_107	Bacteria	Proteobacteria	Alphaproteobacteria	Acetobacterales	Acetobacteraceae	Roseomonas	uncultured_bacterium
Taxa_108	Bacteria	Proteobacteria	Gammaproteobacteria	Pseudomonadales	Moraxellaceae	Psychrobacter	Psychrobacter_adeliensis
Taxa_109	Bacteria	Proteobacteria	Gammaproteobacteria	Alteromonadales	Alteromonadaceae	Alteromonadaceae	Lytechinus_variegatus
Taxa_110	Bacteria	Proteobacteria	Gammaproteobacteria	Pseudomonadales	Moraxellaceae	Enhydrobacter	uncultured_bacterium
Taxa_112	Bacteria	Bacteroidota	Bacteroidia	Flavobacteriales	Flavobacteriaceae	NS11-12_marine_group	uncultured_Bacteroidetes
Taxa_113	Bacteria	Proteobacteria	Gammaproteobacteria	Oceanospirillales	Halomonadaceae	uncultured	uncultured_bacterium
Taxa_114	Bacteria	Proteobacteria	Gammaproteobacteria	Cellvibrionales	Cellvibrionaceae	Aestuariicella	uncultured_bacterium
Taxa_115	Bacteria	Proteobacteria	Alphaproteobacteria	Thalassobaculales	Nisaeaceae	OM75_clade	uncultured_bacterium
Taxa_120	Bacteria	Bacteroidota	Bacteroidia	Flavobacteriales	Flavobacteriaceae	NS2b_marine_group	uncultured_marine
Taxa_121	Bacteria	Proteobacteria	Gammaproteobacteria	Pseudomonadales	Pseudomonadaceae	Pseudomonas	Pseudomonas_aeruginosa
Taxa_122	Bacteria	Proteobacteria	Gammaproteobacteria	Alteromonadales	Alteromonadaceae	Paraglaciecola	Alteromonas_sp.
Taxa_123	Bacteria	Cyanobacteria	Cyanobacteriia	Synechococcales	Cyanobiaceae	Synechococcus_CC9902	uncultured_bacterium
Taxa_125	Bacteria	Proteobacteria	Gammaproteobacteria	Pseudomonadales	Pseudomonadaceae	Pseudomonas	Pseudomonas_sp.
Taxa_126	Bacteria	Proteobacteria	Alphaproteobacteria	Rhodobacterales	Rhodobacteraceae	Phaeobacter	uncultured_bacterium
Taxa_127	Bacteria	Proteobacteria	Alphaproteobacteria	Rhodobacterales	Rhodobacteraceae	Shimia	uncultured_bacterium
Taxa_128	Bacteria	Proteobacteria	Alphaproteobacteria	Rhodobacterales	Rhodobacteraceae	Sulfitobacter	uncultured_bacterium
Taxa_129	Bacteria	Proteobacteria	Alphaproteobacteria	Rhodobacterales	Rhodobacteraceae	Actibacterium	Oceanicola_sp.
Taxa_130	Bacteria	Bacteroidota	Bacteroidia	Flavobacteriales	Flavobacteriaceae	Arcticiflavibacter	uncultured_Bacteroidetes
Taxa_131	Bacteria	Bacteroidota	Bacteroidia	Flavobacteriales	Flavobacteriaceae	Arcticiflavibacter	uncultured_bacterium
Taxa_133	Bacteria	Proteobacteria	Gammaproteobacteria	Pseudomonadales	Pseudomonadaceae	Pseudomonas	uncultured_bacterium
Taxa_134	Bacteria	Bacteroidota	Bacteroidia	Flavobacteriales	Flavobacteriaceae	NS11-12_marine_group	uncultured_bacterium
Taxa_136	Bacteria	Actinobacteriota	Actinobacteria	Propionibacteriales	Propionibacteriaceae	Cutibacterium	uncultured_bacterium
Taxa_137	Bacteria	Firmicutes	Clostridia	Peptostreptococcales-Tissierellales	Peptostreptococcales-Tissierellales	Peptoniphilus	uncultured_bacterium
Taxa_138	Bacteria	Proteobacteria	Alphaproteobacteria	Sphingomonadales	Sphingomonadaceae	SD04E11	uncultured_bacterium
Taxa_139	Bacteria	Proteobacteria	Gammaproteobacteria	Burkholderiales	Burkholderiaceae	Burkholderia-Caballeronia-Paraburkholderia	Burkholderia_sp.
Taxa_140	Bacteria	Proteobacteria	Gammaproteobacteria	Pseudomonadales	Pseudomonadaceae	Pseudomonas	Pseudomonas_fragi
Taxa_141	Bacteria	Actinobacteriota	Actinobacteria	Micrococcales	Micrococcaceae	Rothia	uncultured_bacterium
Taxa_142	Bacteria	Proteobacteria	Gammaproteobacteria	Enterobacterales	Enterobacteriaceae	Klebsiella	uncultured_bacterium
Taxa_143	Bacteria	Proteobacteria	Gammaproteobacteria	Burkholderiales	Nitrosomonadaceae	IS-44	uncultured_bacterium
Taxa_144	Bacteria	Actinobacteriota	Actinobacteria	Corynebacteriales	Corynebacteriaceae	Corynebacterium	uncultured_bacterium
Taxa_145	Bacteria	Proteobacteria	Gammaproteobacteria	Burkholderiales	Nitrosomonadaceae	DSSD61	uncultured_bacterium
Taxa_147	Bacteria	Proteobacteria	Gammaproteobacteria	Alteromonadales	Pseudoalteromonadaceae	Pseudoalteromonas	Pseudoalteromonas_piscicida
Taxa_148	Bacteria	Proteobacteria	Alphaproteobacteria	Rhodospirillales	Rhodospirillaceae	uncultured	uncultured_bacterium
Taxa_152	Bacteria	Proteobacteria	Alphaproteobacteria	Rhodobacterales	Rhodobacteraceae	Amylibacter	uncultured_marine
Taxa_153	Bacteria	Proteobacteria	Gammaproteobacteria	Alteromonadales	Shewanellaceae	Shewanella	Phage_Swp3
Taxa_154	Bacteria	Proteobacteria	Alphaproteobacteria	Sphingomonadales	Sphingomonadaceae	Altererythrobacter	uncultured_bacterium
Taxa_156	Bacteria	Firmicutes	Bacilli	Bacillales	Bacillaceae	Oceanobacillus	uncultured_bacterium
Taxa_158	Bacteria	Firmicutes	Bacilli	Bacillales	Bacillaceae	Bacillus	Bacillus_licheniformis
Taxa_159	Bacteria	Proteobacteria	Gammaproteobacteria	Alteromonadales	Alteromonadaceae	Salinimonas	uncultured_bacterium
Taxa_160	Bacteria	Proteobacteria	Gammaproteobacteria	Alteromonadales	Pseudoalteromonadaceae	Pseudoalteromonas	Pseudoalteromonas_arctica
Taxa_161	Bacteria	Proteobacteria	Gammaproteobacteria	Alteromonadales	Alteromonadaceae	BD1-7_clade	uncultured_marine
Taxa_162	Bacteria	Proteobacteria	Gammaproteobacteria	Alteromonadales	Shewanellaceae	Shewanella	Shewanella_electrodiphila
Taxa_163	Bacteria	Proteobacteria	Alphaproteobacteria	Rhodobacterales	Rhodobacteraceae	Tropicibacter	uncultured_bacterium
Taxa_164	Bacteria	Proteobacteria	Alphaproteobacteria	Rhodospirillales	Thalassospiraceae	Thalassospira	Thalassospira_sp.
Taxa_165	Bacteria	Proteobacteria	Gammaproteobacteria	Burkholderiales	Rhodocyclaceae	uncultured	uncultured_bacterium
Taxa_167	Bacteria	Actinobacteriota	Actinobacteria	Actinomycetales	Actinomycetaceae	Varibaculum	uncultured_bacterium
Taxa_170	Bacteria	Proteobacteria	Gammaproteobacteria	Alteromonadales	Alteromonadaceae	uncultured	uncultured_marine
Taxa_172	Bacteria	Proteobacteria	Alphaproteobacteria	Rhodobacterales	Rhodobacteraceae	Oceanibulbus	uncultured_Roseobacter
Taxa_174	Bacteria	Dependentiae	Babeliae	Babeliales	Babeliales	Babeliales	uncultured_bacterium
Taxa_175	Bacteria	Bacteroidota	Rhodothermia	Balneolales	Balneolaceae	Gracilimonas	marine_metagenome
Taxa_176	Bacteria	Bacteroidota	Bacteroidia	Flavobacteriales	Flavobacteriaceae	Leeuwenhoekiella	Flavobacterium_sp.
Taxa_177	Bacteria	Proteobacteria	Alphaproteobacteria	Caulobacterales	Hyphomonadaceae	Henriciella	alpha_proteobacterium
Taxa_178	Bacteria	Proteobacteria	Alphaproteobacteria	Rhodobacterales	Rhodobacteraceae	Roseovarius	Roseovarius_aestuariivivens
Taxa_179	Bacteria	Bacteroidota	Bacteroidia	Flavobacteriales	Flavobacteriaceae	NS5_marine_group	uncultured_bacterium
Taxa_180	Bacteria	Proteobacteria	Alphaproteobacteria	Rhodobacterales	Rhodobacteraceae	Roseibacterium	uncultured_bacterium
Taxa_181	Bacteria	Chloroflexi	Anaerolineae	Anaerolineales	Anaerolineaceae	Leptolinea	uncultured_bacterium
Taxa_182	Bacteria	Proteobacteria	Alphaproteobacteria	Rhodobacterales	Rhodobacteraceae	Cognatishimia	uncultured_bacterium
Taxa_185	Bacteria	Proteobacteria	Alphaproteobacteria	Micavibrionales	Kiloniellaceae	uncultured	uncultured_bacterium
Taxa_186	Bacteria	Verrucomicrobiota	Verrucomicrobiae	Chthoniobacterales	Chthoniobacteraceae	Chthoniobacter	uncultured_bacterium
Taxa_187	Bacteria	Proteobacteria	Alphaproteobacteria	Caulobacterales	Hyphomonadaceae	Henriciella	uncultured_bacterium
Taxa_188	Bacteria	Proteobacteria	Gammaproteobacteria	Alteromonadales	Pseudoalteromonadaceae	Pseudoalteromonas	Vibrio_sp.
Taxa_189	Bacteria	Proteobacteria	Gammaproteobacteria	Cellvibrionales	Spongiibacteraceae	BD1-7_clade	uncultured_bacterium
Taxa_190	Bacteria	Proteobacteria	Alphaproteobacteria	Rhizobiales	Rhizobiaceae	Allorhizobium-Neorhizobium-Pararhizobium-Rhizobium	metagenome
Taxa_193	Bacteria	Proteobacteria	Gammaproteobacteria	Oceanospirillales	Halomonadaceae	Halomonas	Serratia_symbiotica
Taxa_194	Bacteria	Synergistota	Synergistia	Synergistales	Synergistaceae	uncultured	uncultured_bacterium
Taxa_196	Bacteria	Proteobacteria	Gammaproteobacteria	Alteromonadales	Pseudoalteromonadaceae	Pseudoalteromonas	bacterium_RFB
Taxa_197	Bacteria	Bacteroidota	Bacteroidia	Sphingobacteriales	env.OPS_17	env.OPS_17	uncultured_bacterium
Taxa_198	Bacteria	Proteobacteria	Alphaproteobacteria	Rhizobiales	C2U	C2U	uncultured_bacterium
Taxa_199	Bacteria	Proteobacteria	Alphaproteobacteria	Sphingomonadales	Sphingomonadaceae	Sphingorhabdus	uncultured_bacterium
Taxa_200	Bacteria	Proteobacteria	Alphaproteobacteria	Rhodobacterales	Rhodobacteraceae	Rubellimicrobium	uncultured_bacterium
Taxa_201	Bacteria	Proteobacteria	Gammaproteobacteria	Vibrionales	Vibrionaceae	Enterovibrio	uncultured_bacterium
Taxa_202	Bacteria	Proteobacteria	Gammaproteobacteria	Alteromonadales	Vibrionaceae	Vibrio	uncultured_bacterium
Taxa_203	Bacteria	Proteobacteria	Alphaproteobacteria	Rhodobacterales	Rhodobacteraceae	Planktomarina	uncultured_bacterium
Taxa_204	Bacteria	Proteobacteria	Gammaproteobacteria	Oceanospirillales	Endozoicomonadaceae	Endozoicomonas	uncultured_bacterium
Taxa_205	Bacteria	Proteobacteria	Gammaproteobacteria	Cellvibrionales	Cellvibrionaceae	Halioxenophilus	uncultured_bacterium
Taxa_206	Bacteria	Proteobacteria	Gammaproteobacteria	Alteromonadales	Alteromonadaceae	Alcanivorax	uncultured_bacterium
Taxa_207	Bacteria	Proteobacteria	Gammaproteobacteria	Alteromonadales	Shewanellaceae	Shewanella	Shewanella_canadensis
Taxa_208	Bacteria	Proteobacteria	Gammaproteobacteria	Oceanospirillales	Nitrincolaceae	Marinobacterium	Alteromonas_sp.
Taxa_209	Bacteria	Proteobacteria	Alphaproteobacteria	Rhodobacterales	Rhodobacteraceae	Microbulbifer	uncultured_bacterium
Taxa_210	Bacteria	Proteobacteria	Alphaproteobacteria	Rhizobiales	Xanthobacteraceae	Taonella	uncultured_bacterium
Taxa_211	Bacteria	Proteobacteria	Gammaproteobacteria	Enterobacterales	Yersiniaceae	Serratia	uncultured_bacterium
Taxa_212	Bacteria	Bacteroidota	Bacteroidia	Flavobacteriales	Flavobacteriaceae	Flavobacteriaceae	uncultured_bacterium
Taxa_213	Bacteria	Proteobacteria	Gammaproteobacteria	OM182_clade	OM182_clade	OM182_clade	uncultured_gamma
Taxa_214	Bacteria	Proteobacteria	Alphaproteobacteria	Caulobacterales	Hyphomonadaceae	Hellea	uncultured_bacterium
Taxa_215	Bacteria	Proteobacteria	Gammaproteobacteria	Rhizobiales	Devosiaceae	uncultured	metagenome
Taxa_216	Bacteria	Proteobacteria	Alphaproteobacteria	Kordiimonadales	Kordiimonadaceae	Kordiimonas	uncultured_Alphaproteobacteria
Taxa_217	Bacteria	Proteobacteria	Alphaproteobacteria	Parvibaculales	Parvibaculaceae	uncultured	uncultured_bacterium
Taxa_218	Bacteria	Proteobacteria	Alphaproteobacteria	Rhizobiales	Ferrovibrionales	Taonella	uncultured_bacterium
Taxa_221	Bacteria	Proteobacteria	Gammaproteobacteria	Enterobacterales	Morganellaceae	Hydrogenophaga	uncultured_bacterium
Taxa_223	Bacteria	Proteobacteria	Gammaproteobacteria	Alteromonadales	Saccharospirillaceae	Thalassolituus	Thalassolituus_oleivorans
Taxa_224	Bacteria	Actinobacteriota	Actinobacteria	Corynebacteriales	Nocardiaceae	Rhodococcus	uncultured_bacterium
Taxa_225	Bacteria	Proteobacteria	Alphaproteobacteria	Rhodobacterales	Rhodobacteraceae	Sulfitobacter	uncultured_Roseobacter
Taxa_226	Bacteria	Proteobacteria	Gammaproteobacteria	Pseudomonadales	Moraxellaceae	Acinetobacter	Acinetobacter_johnsonii
Taxa_227	Bacteria	Proteobacteria	Gammaproteobacteria	Alteromonadales	Alteromonadaceae	Paraglaciecola	Paraglaciecola_hydrolytica
Taxa_228	Bacteria	Proteobacteria	Gammaproteobacteria	Oceanospirillales	Halomonadaceae	Cobetia	Serratia_symbiotica
Taxa_229	Bacteria	Proteobacteria	Alphaproteobacteria	Sphingomonadales	Sphingomonadaceae	Sphingomonas	uncultured_bacterium
Taxa_230	Bacteria	Proteobacteria	Gammaproteobacteria	Oceanospirillales	Oceanospirillaceae	Oceanospirillum	uncultured_bacterium
Taxa_231	Bacteria	Proteobacteria	Alphaproteobacteria	Rhodobacterales	Rhodobacteraceae	Jannaschia	uncultured_bacterium
Taxa_232	Bacteria	Planctomycetota	Planctomycetes	Pirellulales	Pirellulaceae	Pirellula	uncultured_bacterium
Taxa_234	Bacteria	Proteobacteria	Alphaproteobacteria	Caulobacterales	Rhodobacteraceae	uncultured	uncultured_bacterium
Taxa_236	Bacteria	Proteobacteria	Alphaproteobacteria	Rhizobiales	uncultured	uncultured	metagenome
Taxa_237	Bacteria	Firmicutes	Bacilli	Lactobacillales	Streptococcaceae	Lactococcus	Lactococcus_lactis
Taxa_238	Bacteria	Proteobacteria	Gammaproteobacteria	Ectothiorhodospirales	Ectothiorhodospiraceae	uncultured	uncultured_bacterium
Taxa_239	Bacteria	Proteobacteria	Gammaproteobacteria	Vibrionales	Vibrionaceae	Vibrio	uncultured_gamma
Taxa_240	Bacteria	Proteobacteria	Alphaproteobacteria	Caulobacterales	Hyphomonadaceae	Ponticaulis	uncultured_bacterium
Taxa_241	Bacteria	Proteobacteria	Alphaproteobacteria	Sneathiellales	Sneathiellaceae	Sneathiella	uncultured_bacterium
Taxa_244	Bacteria	Proteobacteria	Alphaproteobacteria	Rhodobacterales	Rhodobacteraceae	Roseobacter_clade_CHAB-I-5_lineage	Tateyamaria_sp.
Taxa_245	Bacteria	Proteobacteria	Alphaproteobacteria	Rhodobacterales	Rhodobacteraceae	Celeribacter	bacterium_enrichment
Taxa_246	Bacteria	Bacteroidota	Bacteroidia	Flavobacteriales	Flavobacteriaceae	Aquibacter	uncultured_bacterium
Taxa_247	Bacteria	Proteobacteria	Gammaproteobacteria	Alteromonadales	Alteromonadaceae	Paraglaciecola	uncultured_Antarctic
Taxa_250	Bacteria	Proteobacteria	Gammaproteobacteria	Methylococcales	Cycloclasticaceae	Cycloclasticus	secondary_endosymbiont
Taxa_251	Bacteria	Proteobacteria	Alphaproteobacteria	Rhizobiales	Rhizobiaceae	Martelella	uncultured_Alphaproteobacteria
Taxa_254	Bacteria	Bacteroidota	Bacteroidia	Flavobacteriales	Flavobacteriaceae	Salinimicrobium	uncultured_bacterium
Taxa_255	Bacteria	Bacteroidota	Bacteroidia	Flavobacteriales	Flavobacteriaceae	Maribacter	uncultured_bacterium
Taxa_257	Bacteria	Proteobacteria	Alphaproteobacteria	Rhodobacterales	Rhodobacteraceae	Ruegeria	bacterium_enrichment
Taxa_258	Bacteria	Proteobacteria	Gammaproteobacteria	Xanthomonadales	Xanthomonadaceae	Arenimonas	uncultured_bacterium
Taxa_259	Bacteria	Proteobacteria	Gammaproteobacteria	Oceanospirillales	Alcanivoracaceae1	Alcanivorax	uncultured_Alcanivorax
Taxa_260	Bacteria	Proteobacteria	Gammaproteobacteria	Oceanospirillales	Halomonadaceae	Cobetia	uncultured_bacterium
Taxa_261	Bacteria	Proteobacteria	Alphaproteobacteria	Rhodobacterales	Rhodobacteraceae	Sedimentitalea	uncultured_bacterium
Taxa_262	Bacteria	Bacteroidota	Bacteroidia	Flavobacteriales	Flavobacteriaceae	Joostella	Joostella_marina
Taxa_263	Bacteria	Proteobacteria	Alphaproteobacteria	Rhodobacterales	Rhodobacteraceae	Sulfitobacter	uncultured_Alphaproteobacteria
Taxa_264	Bacteria	Proteobacteria	Gammaproteobacteria	Oceanospirillales	Saccharospirillaceae	uncultured	uncultured_marine
Taxa_265	Bacteria	Bacteroidota	Bacteroidia	Flavobacteriales	Flavobacteriaceae	WCHB1-32	uncultured_bacterium
Taxa_266	Bacteria	Proteobacteria	Alphaproteobacteria	Rhodobacterales	Rhodobacteraceae	Halocynthiibacter	uncultured_bacterium
Taxa_267	Bacteria	Proteobacteria	Gammaproteobacteria	Alteromonadales	Alteromonadaceae	Glaciecola	uncultured_bacterium
Taxa_270	Bacteria	Bacteroidota	Bacteroidia	Flavobacteriales	Flavobacteriaceae	Dokdonia	Dokdonia_sp.
Taxa_273	Bacteria	Proteobacteria	Gammaproteobacteria	Alteromonadales	Yersiniaceae	Serratia	Serratia_symbiotica
Taxa_275	Bacteria	Proteobacteria	Alphaproteobacteria	Caulobacterales	Hyphomonadaceae	uncultured	uncultured_Alphaproteobacteria
Taxa_276	Bacteria	Bacteroidota	Bacteroidia	Bacteroidales	Bacteroidaceae	Bacteroides	uncultured_organism
Taxa_277	Bacteria	Proteobacteria	Gammaproteobacteria	Nitrosococcales	Nitrosococcaceae	CI75cm.2.12	uncultured_bacterium
Taxa_278	Bacteria	Proteobacteria	Gammaproteobacteria	Nitrosococcales	Methylophagaceae	uncultured	uncultured_bacterium
Taxa_280	Bacteria	Bacteroidota	Bacteroidia	Flavobacteriales	Flavobacteriaceae	Mesonia	uncultured_marine
Taxa_281	Bacteria	Proteobacteria	Alphaproteobacteria	Rhodobacterales	Rhodobacteraceae	Jannaschia	uncultured_Roseobacter
Taxa_282	Bacteria	Bacteroidota	Bacteroidia	Flavobacteriales	Flavobacteriaceae	Salegentibacter	Salegentibacter_echinorum
Taxa_285	Bacteria	Proteobacteria	Gammaproteobacteria	Oceanospirillales	Nitrincolaceae	Marinobacterium	Marinobacterium_sp.
Taxa_286	Bacteria	Proteobacteria	Alphaproteobacteria	Caulobacterales	Hyphomonadaceae	Hyphomonas	uncultured_organism
Taxa_287	Bacteria	Bacteroidota	Bacteroidia	Flavobacteriales	Flavobacteriaceae	NS5_marine_group	uncultured_Bacteroidetes
Taxa_291	Bacteria	Bacteroidota	Bacteroidia	Flavobacteriales	Flavobacteriaceae	Dokdonia	Dokdonia_flava
Taxa_293	Bacteria	Proteobacteria	Gammaproteobacteria	Oceanospirillales	Halomonadaceae	Halomonas	Halomonas_smyrnensis
Taxa_294	Bacteria	Bacteroidota	Bacteroidia	Flavobacteriales	Flavobacteriaceae	Aquimarina	Aquimarina_sp.
Taxa_295	Bacteria	Proteobacteria	Alphaproteobacteria	Rhodospirillales	Thalassospiraceae	Thalassospira	Thalassospira_xiamenensis
Taxa_298	Bacteria	Bacteroidota	Bacteroidia	Flavobacteriales	Flavobacteriaceae	NS5_marine_group	uncultured_Flavobacteriaceae
Taxa_299	Bacteria	Firmicutes	Clostridia	Peptostreptococcales-Tissierellales	Peptostreptococcales-Tissierellales	Anaerococcus	uncultured_bacterium
Taxa_300	Bacteria	Proteobacteria	Alphaproteobacteria	Caulobacterales	Hyphomonadaceae	Hellea	uncultured_marine
Taxa_302	Bacteria	Proteobacteria	Gammaproteobacteria	Oceanospirillales	Saccharospirillaceae	Oleibacter	uncultured_bacterium
Taxa_303	Bacteria	Bacteroidota	Bacteroidia	Flavobacteriales	Flavobacteriaceae	Dokdonia	uncultured_bacterium
Taxa_304	Bacteria	Proteobacteria	Gammaproteobacteria	Pseudomonadales	Moraxellaceae	Psychrobacter	uncultured_bacterium
Taxa_305	Bacteria	Bacteroidota	Bacteroidia	Flavobacteriales	Flavobacteriaceae	Formosa	uncultured_marine
Taxa_306	Bacteria	Proteobacteria	Alphaproteobacteria	Rhodobacterales	Rhodobacteraceae	Sulfitobacter	uncultured_marine
Taxa_307	Bacteria	Proteobacteria	Gammaproteobacteria	Alteromonadales	Alteromonadaceae	Alteromonas	Alteromonas_naphthalenivorans
Taxa_308	Bacteria	Firmicutes	Bacilli	Staphylococcales	Staphylococcaceae	Staphylococcus	Staphylococcus_equorum
Taxa_309	Bacteria	Proteobacteria	Alphaproteobacteria	Rhodospirillales	Rhodospirillaceae	Insolitispirillum	microbial_mat
Taxa_310	Bacteria	Bacteroidota	Bacteroidia	Flavobacteriales	Flavobacteriaceae	Leeuwenhoekiella	uncultured_Flavobacterium
Taxa_311	Bacteria	Proteobacteria	Gammaproteobacteria	Alteromonadales	Pseudoalteromonadaceae	Pseudoalteromonas	Pseudoalteromonas_rubra
Taxa_312	Bacteria	Bacteroidota	Bacteroidia	Flavobacteriales	Flavobacteriaceae	Psychroflexus	uncultured_bacterium
Taxa_313	Bacteria	Bacteroidota	Bacteroidia	Flavobacteriales	Flavobacteriaceae	NS4_marine_group	uncultured_marine
Taxa_314	Bacteria	Proteobacteria	Gammaproteobacteria	Alteromonadales	Colwelliaceae	BD1-7_clade	uncultured_bacterium
Taxa_315	Bacteria	Proteobacteria	Alphaproteobacteria	Rhodobacterales	Rhodobacteraceae	Paracoccus	uncultured_bacterium
Taxa_320	Bacteria	Proteobacteria	Gammaproteobacteria	Alteromonadales	Alteromonadaceae	Marinobacterium	Alteromonas_sp.
Taxa_322	Bacteria	Proteobacteria	Alphaproteobacteria	SAR86_clade	SAR86_clade	SAR86_clade	uncultured_marine
Taxa_323	Bacteria	Proteobacteria	Gammaproteobacteria	Oceanospirillales	Nitrincolaceae	Profundimonas	uncultured_bacterium
Taxa_324	Bacteria	Proteobacteria	Gammaproteobacteria	Alteromonadales	Idiomarinaceae	Idiomarina	Idiomarina_sp.
Taxa_325	Bacteria	Proteobacteria	Gammaproteobacteria	Enterobacterales	Enterobacteriaceae	Sulfitobacter	uncultured_bacterium
Taxa_327	Bacteria	Proteobacteria	Gammaproteobacteria	Oceanospirillales	Marinomonadaceae	Marinomonas	uncultured_Oceanospirillaceae
Taxa_328	Bacteria	Firmicutes	Negativicutes	Veillonellales-Selenomonadales	Selenomonadaceae	Selenomonas	uncultured_bacterium
Taxa_329	Bacteria	Proteobacteria	Gammaproteobacteria	Alteromonadales	Pseudoalteromonadaceae	Pseudoalteromonas	marine_bacterium
Taxa_330	Bacteria	Proteobacteria	Gammaproteobacteria	Pseudomonadales	Pseudomonadaceae	Pseudomonas	Pseudomonas_resinovorans
Taxa_332	Bacteria	Proteobacteria	Gammaproteobacteria	Thiomicrospirales	Thiomicrospiraceae	Thiomicrorhabdus	uncultured_bacterium
Taxa_334	Bacteria	Proteobacteria	Alphaproteobacteria	Rhodobacterales	Rhodobacteraceae	Altererythrobacter	uncultured_bacterium
Taxa_335	Bacteria	Proteobacteria	Gammaproteobacteria	Alteromonadales	Alteromonadaceae	Alteromonas	Alteromonas_stellipolaris
Taxa_336	Bacteria	Proteobacteria	Gammaproteobacteria	Alteromonadales	Shewanellaceae	Shewanella	uncultured_bacterium
Taxa_337	Bacteria	Bacteroidota	Bacteroidia	Flavobacteriales	Flavobacteriaceae	Tenacibaculum	Tenacibaculum_sp.
Taxa_338	Bacteria	Dadabacteria	Dadabacteriia	Dadabacteriales	Dadabacteriales	Dadabacteriales	uncultured_bacterium
Taxa_339	Bacteria	Proteobacteria	Gammaproteobacteria	Alteromonadales	Shewanellaceae	Shewanella	Shewanella_sp.
Taxa_340	Bacteria	Proteobacteria	Gammaproteobacteria	Rhodobacterales	Rhodobacteraceae	Sulfitobacter	uncultured_bacterium
Taxa_341	Bacteria	Bacteroidota	Bacteroidia	Flavobacteriales	Flavobacteriaceae	Leeuwenhoekiella	Leeuwenhoekiella_blandensis
Taxa_342	Bacteria	Proteobacteria	Gammaproteobacteria	Alteromonadales	Alteromonadaceae	Glaciecola	uncultured_Glaciecola
Taxa_343	Bacteria	Proteobacteria	Gammaproteobacteria	Alteromonadales	Alteromonadaceae	Pseudobowmanella	Alteromonas_sp.
Taxa_344	Bacteria	Bacteroidota	Bacteroidia	Flavobacteriales	Flavobacteriaceae	Winogradskyella	uncultured_bacterium
Taxa_345	Bacteria	Actinobacteriota	Acidimicrobiia	Microtrichales	Microtrichaceae	Sva0996_marine_group	uncultured_bacterium
Taxa_346	Bacteria	Proteobacteria	Alphaproteobacteria	Rhizobiales	Rhodobacteraceae	Devosia	uncultured_bacterium
Taxa_347	Bacteria	Proteobacteria	Gammaproteobacteria	Oceanospirillales	Rhodospirillaceae	uncultured	uncultured_bacterium
Taxa_348	Bacteria	Bacteroidota	Bacteroidia	Flavobacteriales	Flavobacteriaceae	Polaribacter	uncultured_Polaribacter
Taxa_349	Bacteria	Proteobacteria	Gammaproteobacteria	Alteromonadales	Alteromonadaceae	Colwellia	uncultured_Antarctic
Taxa_350	Bacteria	Actinobacteriota	Actinobacteria	Frankiales	uncultured	uncultured	uncultured_bacterium
Taxa_351	Bacteria	Proteobacteria	Clostridia	Clostridiales	Clostridiaceae	Clostridium_sensu_stricto_1	uncultured_bacterium
Taxa_352	Bacteria	Bacteroidota	Bacteroidia	Flavobacteriales	Cryomorphaceae	uncultured	uncultured_bacterium
Taxa_354	Bacteria	Proteobacteria	Gammaproteobacteria	Alteromonadales	Alteromonadaceae	Agarivorans	Aliagarivorans_sp.
Taxa_356	Bacteria	Firmicutes	Bacilli	Bacillales	Bacillaceae	Bacillus	uncultured_Bacillus
Taxa_357	Bacteria	Firmicutes	Bacilli	Bacillales	Bacillaceae	Bacillus	metagenome
Taxa_363	Bacteria	Proteobacteria	Gammaproteobacteria	Nitrosococcales	Methylophagaceae	Marine_Methylotrophic_Group_3	uncultured_gamma
Taxa_368	Bacteria	Proteobacteria	Gammaproteobacteria	Burkholderiales	Methylophilaceae	Methylotenera	uncultured_bacterium
Taxa_370	Bacteria	Proteobacteria	Gammaproteobacteria	Enterobacterales	Pectobacteriaceae	Sodalis	endosymbiont_of
Taxa_375	Bacteria	Proteobacteria	Alphaproteobacteria	Puniceispirillales	uncultured	uncultured	uncultured_bacterium
Taxa_376	Bacteria	Proteobacteria	Gammaproteobacteria	Cellvibrionales	Porticoccaceae	uncultured	uncultured_bacterium
Taxa_381	Bacteria	Proteobacteria	Alphaproteobacteria	Rhizobiales	Beijerinckiaceae	Methylobacterium-Methylorubrum	uncultured_bacterium
Taxa_382	Bacteria	Proteobacteria	Alphaproteobacteria	Rhizobiales	Rhodobacteraceae	uncultured	uncultured_bacterium
Taxa_384	Bacteria	Proteobacteria	Gammaproteobacteria	Burkholderiales	Comamonadaceae	Acidovorax	uncultured_Acidovorax
Taxa_385	Bacteria	Proteobacteria	Gammaproteobacteria	Alteromonadales	Psychromonadaceae	Psychromonas	uncultured_bacterium
Taxa_386	Bacteria	Proteobacteria	Alphaproteobacteria	Parvibaculales	PS1_clade	uncultured	uncultured_bacterium
Taxa_387	Bacteria	Proteobacteria	Gammaproteobacteria	Alteromonadales	Alteromonadaceae	Glaciecola	Alteromonas_sp.
Taxa_388	Bacteria	Proteobacteria	Gammaproteobacteria	Arenicellales	Arenicellaceae	HTCC5015	uncultured_gamma
Taxa_389	Bacteria	Proteobacteria	Gammaproteobacteria	Oceanospirillales	Alcanivoracaceae1	Alcanivorax	uncultured_bacterium
Taxa_390	Bacteria	Proteobacteria	Gammaproteobacteria	Vibrionales	Vibrionaceae	Vibrio	uncultured_bacterium
Taxa_391	Bacteria	Proteobacteria	Alphaproteobacteria	Rhizobiales	Rhizobiaceae	Parvibaculum	uncultured_bacterium
Taxa_392	Bacteria	Proteobacteria	Gammaproteobacteria	Oceanospirillales	Halomonadaceae	Halomonas	uncultured_bacterium
Taxa_393	Bacteria	Proteobacteria	Gammaproteobacteria	Alteromonadales	Colwelliaceae	Colwellia	uncultured_Antarctic
Taxa_394	Bacteria	Proteobacteria	Alphaproteobacteria	Rhodobacterales	Rhodobacteraceae	Planktotalea	uncultured_bacterium
Taxa_395	Bacteria	Proteobacteria	Gammaproteobacteria	Alteromonadales	Pseudoalteromonadaceae	Pseudoalteromonas	Pseudoalteromonas_paragorgicola
Taxa_396	Bacteria	Chloroflexi	Dehalococcoidia	SAR202_clade	SAR202_clade	SAR202_clade	uncultured_Chloroflexi
Taxa_397	Bacteria	Proteobacteria	Alphaproteobacteria	Rhodobacterales	Rhodobacteraceae	Pseudophaeobacter	uncultured_bacterium
Taxa_398	Bacteria	Proteobacteria	Gammaproteobacteria	Oceanospirillales	Nitrincolaceae	Marinobacterium	uncultured_Marinobacterium
Taxa_399	Bacteria	SAR324_clade(Marine_group_B)	SAR324_clade(Marine_group_B)	SAR324_clade(Marine_group_B)	SAR324_clade(Marine_group_B)	SAR324_clade(Marine_group_B)	uncultured_bacterium
Taxa_400	Bacteria	Proteobacteria	Alphaproteobacteria	Rhizobiales	C2U	C2U	uncultured_organism
Taxa_401	Bacteria	Proteobacteria	Gammaproteobacteria	Piscirickettsiales	Piscirickettsiaceae	Candidatus_Endoecteinascidia	uncultured_gamma
Taxa_402	Bacteria	Actinobacteriota	Actinobacteria	Micrococcales	Micrococcaceae	Arthrobacter	Arthrobacter_globiformis
Taxa_403	Bacteria	Planctomycetota	Planctomycetes	Pirellulales	Pirellulaceae	Rubripirellula	uncultured_planctomycete
Taxa_404	Bacteria	Proteobacteria	Gammaproteobacteria	Pseudomonadales	Moraxellaceae	Acinetobacter	Acinetobacter_endosymbiont
Taxa_405	Bacteria	Proteobacteria	Gammaproteobacteria	Burkholderiales	Neisseriaceae	uncultured	uncultured_bacterium
Taxa_406	Bacteria	Bacteroidota	Bacteroidia	Flavobacteriales	Flavobacteriaceae	Gramella	Gramella_sp.
Taxa_407	Bacteria	Proteobacteria	Alphaproteobacteria	SAR11_clade	Clade_I	Clade_Ia	uncultured_Pelagibacterales
Taxa_408	Bacteria	Proteobacteria	Alphaproteobacteria	Rhodobacterales	Rhodobacteraceae	Roseobacter_clade_NAC11-7_lineage	uncultured_Alphaproteobacteria
Taxa_409	Bacteria	Proteobacteria	Gammaproteobacteria	HOC36	HOC36	HOC36	uncultured_gamma
Taxa_410	Bacteria	Proteobacteria	Alphaproteobacteria	Rhodospirillales	Magnetospiraceae	uncultured	uncultured_Alphaproteobacteria
Taxa_411	Bacteria	Proteobacteria	Alphaproteobacteria	Rhodobacterales	Rhodobacteraceae	Falsirhodobacter	uncultured_Alphaproteobacteria
Taxa_412	Bacteria	Proteobacteria	Gammaproteobacteria	Oceanospirillales	Halomonadaceae	Halomonas	bacterium_24B1
Taxa_413	Bacteria	Chloroflexi	Dehalococcoidia	SAR202_clade	SAR202_clade	SAR202_clade	uncultured_bacterium
Taxa_414	Bacteria	Proteobacteria	Alphaproteobacteria	Rhodobacterales	Rhodobacteraceae	Sneathiella	uncultured_bacterium
Taxa_415	Bacteria	Proteobacteria	Gammaproteobacteria	Cellvibrionales	Microbulbiferaceae	Microbulbifer	Microbulbifer_sp.
Taxa_416	Bacteria	Proteobacteria	Gammaproteobacteria	Vibrionales	Vibrionaceae	Vibrio	Vibrio_vulnificus
Taxa_417	Bacteria	Proteobacteria	Gammaproteobacteria	Alteromonadales	Moritellaceae	Moritella	uncultured_bacterium
Taxa_418	Bacteria	Proteobacteria	Gammaproteobacteria	Oceanospirillales	Nitrincolaceae	uncultured	uncultured_bacterium
Taxa_419	Bacteria	Verrucomicrobiota	Verrucomicrobiae	Verrucomicrobiales	DEV007	DEV007	uncultured_bacterium
Taxa_420	Bacteria	Bacteroidota	Bacteroidia	Flavobacteriales	Flavobacteriaceae	Planktosalinus	uncultured_bacterium
Taxa_421	Bacteria	Proteobacteria	Gammaproteobacteria	Alteromonadales	Pseudoalteromonadaceae	Pseudoalteromonas	uncultured_gamma
Taxa_422	Bacteria	Proteobacteria	Gammaproteobacteria	Oceanospirillales	Cellvibrionaceae	Halioxenophilus	uncultured_bacterium
Taxa_423	Bacteria	Proteobacteria	Gammaproteobacteria	Alteromonadales	Shewanellaceae	Psychrobium	uncultured_bacterium
Taxa_424	Bacteria	Proteobacteria	Gammaproteobacteria	Pseudomonadales	Pseudomonadaceae	Pseudomonas	metagenome
Taxa_425	Bacteria	Proteobacteria	Gammaproteobacteria	Nitrosococcales	Methylophagaceae	uncultured	uncultured_Piscirickettsiaceae
Taxa_426	Bacteria	Proteobacteria	Alphaproteobacteria	Rhodobacterales	Rhodobacteraceae	Celeribacter	Pseudoruegeria_sp.
Taxa_427	Bacteria	Proteobacteria	Gammaproteobacteria	Alteromonadales	Pseudoalteromonadaceae	Pseudoalteromonas	Pseudoalteromonas_espejiana
Taxa_428	Bacteria	Proteobacteria	Gammaproteobacteria	Oceanospirillales	Saccharospirillaceae	Saccharospirillum	Saccharospirillum_sp.
Taxa_431	Bacteria	Proteobacteria	Gammaproteobacteria	Oceanospirillales	Nitrincolaceae	Motiliproteus	uncultured_bacterium
Taxa_432	Bacteria	Actinobacteriota	Actinobacteria	Micrococcales	Brevibacteriaceae	Brevibacterium	uncultured_bacterium
Taxa_436	Bacteria	Actinobacteriota	Acidimicrobiia	Actinomarinales	Actinomarinaceae	Candidatus_Actinomarina	uncultured_marine
Taxa_439	Bacteria	Proteobacteria	Gammaproteobacteria	Alteromonadales	Alteromonadaceae	Rheinheimera	uncultured_Rheinheimera
Taxa_441	Bacteria	Proteobacteria	Gammaproteobacteria	Oceanospirillales	Halomonadaceae	Halomonas	Halomonas_aquamarina
Taxa_442	Bacteria	Marinimicrobia_(SAR406_clade)	Marinimicrobia_(SAR406_clade)	Marinimicrobia_(SAR406_clade)	Marinimicrobia_(SAR406_clade)	Marinimicrobia_(SAR406_clade)	uncultured_bacterium
Taxa_443	Bacteria	Proteobacteria	Alphaproteobacteria	Parvibaculales	PS1_clade	PS1_clade	uncultured_bacterium
Taxa_444	Bacteria	Proteobacteria	Gammaproteobacteria	Vibrionales	Vibrionaceae	Vibrio	Photobacterium_sp.
Taxa_445	Bacteria	SAR324_clade(Marine_group_B)	SAR324_clade(Marine_group_B)	SAR324_clade(Marine_group_B)	SAR324_clade(Marine_group_B)	SAR324_clade(Marine_group_B)	uncultured_marine
Taxa_446	Bacteria	Actinobacteriota	Actinobacteria	Micrococcales	Micrococcaceae	Micrococcus	uncultured_bacterium
Taxa_447	Bacteria	Verrucomicrobiota	Verrucomicrobiae	Verrucomicrobiales	DEV007	DEV007	uncultured_Verrucomicrobiaceae
Taxa_448	Bacteria	Proteobacteria	Gammaproteobacteria	Alteromonadales	Alteromonadaceae	Glaciecola	uncultured_gamma
Taxa_449	Bacteria	Proteobacteria	Gammaproteobacteria	Vibrionales	Vibrionaceae	Vibrio	uncultured_Antarctic
Taxa_451	Bacteria	Proteobacteria	Gammaproteobacteria	Alteromonadales	Colwelliaceae	Colwellia	uncultured_Colwellia
Taxa_456	Bacteria	Firmicutes	Negativicutes	Veillonellales-Selenomonadales	Veillonellaceae	Veillonella	uncultured_organism
Taxa_457	Bacteria	Proteobacteria	Gammaproteobacteria	Oceanospirillales	Cellvibrionaceae	Halioxenophilus	Saccharospirillum_sp.
Taxa_459	Bacteria	Desulfobacterota	Desulfuromonadia	Bradymonadales	Bradymonadales	Bradymonadales	uncultured_delta
Taxa_462	Bacteria	Proteobacteria	Gammaproteobacteria	Alteromonadales	Alteromonadaceae	Glaciecola	Glaciecola_pallidula
Taxa_463	Bacteria	Proteobacteria	Gammaproteobacteria	Oceanospirillales	Halomonadaceae	Halomonadaceae	Marinospirillum_sp.
Taxa_464	Bacteria	Proteobacteria	Gammaproteobacteria	Oceanospirillales	Nitrincolaceae	Neptuniibacter	uncultured_bacterium
Taxa_465	Bacteria	Proteobacteria	Gammaproteobacteria	Alteromonadales	Colwelliaceae	Neptuniibacter	uncultured_bacterium
Taxa_466	Bacteria	Proteobacteria	Gammaproteobacteria	Alteromonadales	Colwelliaceae	Colwellia	uncultured_bacterium
Taxa_467	Bacteria	Bacteroidota	Bacteroidia	Flavobacteriales	Cryomorphaceae	Vicingus	uncultured_bacterium
Taxa_468	Bacteria	Bacteroidota	Bacteroidia	Flavobacteriales	Flavobacteriaceae	Mesoflavibacter	uncultured_bacterium
Taxa_469	Bacteria	Proteobacteria	Gammaproteobacteria	Oceanospirillales	Marinomonadaceae	Marinomonas	uncultured_marine
Taxa_470	Bacteria	Proteobacteria	Gammaproteobacteria	Vibrionales	Vibrionaceae	Vibrio	Vibrio_parahaemolyticus
Taxa_471	Bacteria	Proteobacteria	Gammaproteobacteria	Alteromonadales	Colwelliaceae	Thalassotalea	uncultured_bacterium
Taxa_472	Bacteria	Bacteroidota	Rhodothermia	Balneolales	Balneolaceae	uncultured	uncultured_organism
Taxa_473	Bacteria	Proteobacteria	Gammaproteobacteria	Oceanospirillales	Nitrincolaceae	Cocleimonas	uncultured_gamma
Taxa_474	Bacteria	Proteobacteria	Alphaproteobacteria	Rhodospirillales	Thalassospiraceae	uncultured	uncultured_bacterium
Taxa_475	Bacteria	Bacteroidota	Bacteroidia	Flavobacteriales	Flavobacteriaceae	uncultured	uncultured_sediment
Taxa_476	Bacteria	Proteobacteria	Gammaproteobacteria	Oceanospirillales	Nitrincolaceae	Neptuniibacter	Neptuniibacter_sp.
Taxa_477	Bacteria	Bacteroidota	Bacteroidia	Flavobacteriales	Flavobacteriaceae	Vicingus	uncultured_bacterium
Taxa_478	Bacteria	Bacteroidota	Bacteroidia	Flavobacteriales	Flavobacteriaceae	Maribacter	Maribacter_dokdonensis
Taxa_479	Bacteria	Proteobacteria	Gammaproteobacteria	Oceanospirillales	Litoricolaceae	Litoricola	uncultured_bacterium
Taxa_480	Bacteria	Bacteroidota	Rhodothermia	Balneolales	Balneolaceae	uncultured	uncultured_bacterium
Taxa_481	Bacteria	Proteobacteria	Alphaproteobacteria	Micavibrionales	uncultured	uncultured	uncultured_bacterium
Taxa_483	Bacteria	Bacteroidota	Bacteroidia	Flavobacteriales	Flavobacteriaceae	Maribacter	Cytophaga_sp.
Taxa_485	Bacteria	Bacteroidota	Bacteroidia	Flavobacteriales	Flavobacteriaceae	Zobellia	uncultured_bacterium
Taxa_486	Bacteria	Proteobacteria	Gammaproteobacteria	Pseudomonadales	Moraxellaceae	Acinetobacter	Acinetobacter_baumannii
Taxa_487	Bacteria	Proteobacteria	Gammaproteobacteria	uncultured	uncultured	uncultured	uncultured_bacterium
Taxa_488	Bacteria	Proteobacteria	Gammaproteobacteria	Oceanospirillales	Marinomonadaceae	Marinomonas	uncultured_bacterium
Taxa_489	Bacteria	Proteobacteria	Gammaproteobacteria	Cellvibrionales	Cellvibrionaceae	Candidatus_Endobugula	uncultured_gamma
Taxa_490	Bacteria	Proteobacteria	Gammaproteobacteria	Burkholderiales	Comamonadaceae	Pseudoalteromonas	uncultured_bacterium
Taxa_492	Bacteria	Proteobacteria	Alphaproteobacteria	Rhodobacterales	Rhodobacteraceae	PS1_clade	uncultured_Alphaproteobacteria
Taxa_493	Bacteria	Proteobacteria	Gammaproteobacteria	Oceanospirillales	Pseudohongiellaceae	Pseudohongiella	uncultured_Marinomonas
Taxa_495	Bacteria	Bacteroidota	Bacteroidia	Flavobacteriales	Flavobacteriaceae	Flavobacterium	uncultured_Flavobacterium
Taxa_496	Bacteria	Bacteroidota	Bacteroidia	Flavobacteriales	Flavobacteriaceae	Maribacter	Maribacter_aestuarii
Taxa_498	Bacteria	Proteobacteria	Gammaproteobacteria	Oceanospirillales	Aeromonadaceae	Aeromonas	uncultured_bacterium
Taxa_499	Bacteria	Proteobacteria	Alphaproteobacteria	Rhodospirillales	Thalassospiraceae	Thalassospira	Thalassospira_lucentensis
Taxa_500	Bacteria	Bacteroidota	Bacteroidia	Flavobacteriales	Flavobacteriaceae	Olleya	Olleya_marilimosa
Taxa_501	Bacteria	Bacteroidota	Bacteroidia	Flavobacteriales	Flavobacteriaceae	NS4_marine_group	uncultured_bacterium
Taxa_504	Bacteria	Proteobacteria	Gammaproteobacteria	Alteromonadales	Colwelliaceae	uncultured	uncultured_bacterium
Taxa_506	Bacteria	Proteobacteria	Alphaproteobacteria	Rhodobacterales	Rhodobacteraceae	uncultured	uncultured_marine
Taxa_507	Bacteria	Bacteroidota	Bacteroidia	Flavobacteriales	Flavobacteriaceae	Ulvibacter	uncultured_Bacteroidetes
Taxa_508	Bacteria	Bacteroidota	Bacteroidia	Flavobacteriales	Flavobacteriaceae	Polaribacter	uncultured_marine
Taxa_510	Bacteria	Proteobacteria	Alphaproteobacteria	Clostridiales	Clostridiaceae	uncultured	uncultured_bacterium
Taxa_512	Bacteria	Proteobacteria	Gammaproteobacteria	Enterobacterales	Yersiniaceae	Serratia	Serratia_rubidaea
Taxa_513	Bacteria	Bacteroidota	Bacteroidia	Flavobacteriales	Flavobacteriaceae	Zobellia	Zobellia_sp.
Taxa_514	Bacteria	Proteobacteria	Gammaproteobacteria	Vibrionales	Vibrionaceae	Vibrio	Vibrio_campbellii
Taxa_518	Bacteria	Proteobacteria	Alphaproteobacteria	Rhodobacterales	Rhodobacteraceae	BD1-7_clade	uncultured_marine
Taxa_519	Bacteria	Proteobacteria	Alphaproteobacteria	Rhodobacterales	Rhodobacteraceae	Sulfitobacter	uncultured_Rhodobacteraceae
Taxa_522	Bacteria	Bacteroidota	Bacteroidia	Flavobacteriales	Flavobacteriaceae	Muricauda	uncultured_bacterium
Taxa_523	Bacteria	Bacteroidota	Bacteroidia	Flavobacteriales	Flavobacteriaceae	Galbibacter	uncultured_bacterium
Taxa_524	Bacteria	Bacteroidota	Bacteroidia	Flavobacteriales	NS7_marine_group	NS7_marine_group	uncultured_bacterium
Taxa_525	Bacteria	Proteobacteria	Alphaproteobacteria	Rhodobacterales	Rhodobacteraceae	Tropicimonas	uncultured_bacterium
Taxa_528	Bacteria	Bacteroidota	Bacteroidia	Flavobacteriales	Flavobacteriaceae	Aurantivirga	uncultured_bacterium
Taxa_532	Bacteria	Proteobacteria	Alphaproteobacteria	Rhodobacterales	Rhodobacteraceae	Rhodobacteraceae	Oceaniglobus_indicus
Taxa_536	Bacteria	Bacteroidota	Bacteroidia	Flavobacteriales	Flavobacteriaceae	Olleya	uncultured_bacterium
Taxa_537	Bacteria	Bacteroidota	Bacteroidia	Flavobacteriales	Flavobacteriaceae	Olleya	uncultured_Flavobacteriaceae
Taxa_539	Bacteria	Bacteroidota	Bacteroidia	Sphingobacteriales	NS11-12_marine_group	NS11-12_marine_group	uncultured_bacterium
Taxa_544	Bacteria	Proteobacteria	Gammaproteobacteria	Oceanospirillales	Saccharospirillaceae	Thalassolituus	Thalassolituus_oleivorans
Taxa_545	Bacteria	Proteobacteria	Gammaproteobacteria	Alteromonadales	Marinobacteraceae	Marinobacter	Marinobacter_sp.
Taxa_546	Bacteria	Proteobacteria	Alphaproteobacteria	Rhodobacterales	Rhodobacteraceae	Marivita	uncultured_bacterium
Taxa_547	Bacteria	Bacteroidota	Bacteroidia	Flavobacteriales	NS9_marine_group	NS9_marine_group	uncultured_marine
Taxa_548	Bacteria	Proteobacteria	Gammaproteobacteria	Methylococcales	Cycloclasticaceae	Cycloclasticus	Cycloclasticus_pugetii
Taxa_549	Bacteria	Bacteroidota	Bacteroidia	Flavobacteriales	Flavobacteriaceae	Antarcticibacterium	uncultured_bacterium
Taxa_550	Bacteria	Proteobacteria	Alphaproteobacteria	Rhodobacterales	Rhodobacteraceae	Thioclava	alpha_proteobacterium
Taxa_551	Bacteria	Firmicutes	Bacilli	Lactobacillales	Enterococcaceae	Enterococcus	Melissococcus_plutonius
Taxa_552	Bacteria	Firmicutes	Clostridia	Clostridiales	Clostridiaceae	Clostridium_sensu_stricto_1	uncultured_bacterium
Taxa_553	Bacteria	Proteobacteria	Gammaproteobacteria	Oceanospirillales	Saccharospirillaceae	Marinomonas	uncultured_marine
Taxa_555	Bacteria	Proteobacteria	Gammaproteobacteria	Vibrionales	Vibrionaceae	Vibrio	Vibrio_harveyi
Taxa_557	Bacteria	Proteobacteria	Gammaproteobacteria	Enterobacterales	Enterobacteriaceae	Escherichia-Shigella	uncultured_Shigella
Taxa_558	Bacteria	Proteobacteria	Gammaproteobacteria	Methylococcales	Cycloclasticaceae	uncultured	uncultured_bacterium
Taxa_562	Bacteria	Proteobacteria	Alphaproteobacteria	Rickettsiales	SM2D12	SM2D12	uncultured_Alphaproteobacteria
Taxa_563	Bacteria	Proteobacteria	Gammaproteobacteria	Oceanospirillales	Saccharospirillaceae	Oleibacter	Oleibacter_marinus
Taxa_564	Bacteria	Proteobacteria	Gammaproteobacteria	Alteromonadales	Aeromonadaceae	Aeromonas	uncultured_bacterium
Taxa_565	Bacteria	Proteobacteria	Gammaproteobacteria	Enterobacterales	Hafniaceae	Edwardsiella	uncultured_bacterium
Taxa_566	Bacteria	Proteobacteria	Alphaproteobacteria	Rhodobacterales	Rhodobacteraceae	Maritimibacter	uncultured_bacterium
Taxa_568	Bacteria	Proteobacteria	Alphaproteobacteria	Rhizobiales	Rhizobiales_Incertae_Sedis	Bauldia	uncultured_bacterium
Taxa_572	Bacteria	Proteobacteria	Alphaproteobacteria	Rhodobacterales	Rhodobacteraceae	Paracoccus	Paracoccus_sp.
Taxa_573	Bacteria	Proteobacteria	Gammaproteobacteria	Oceanospirillales	Halomonadaceae	Cobetia	Halomonas_sp.
Taxa_574	Bacteria	Proteobacteria	Gammaproteobacteria	Oceanospirillales	Nitrincolaceae	Marinobacterium	uncultured_bacterium
Taxa_575	Bacteria	Proteobacteria	Alphaproteobacteria	Rhodobacterales	Rhodobacteraceae	Ruegeria	uncultured_organism
Taxa_576	Bacteria	Proteobacteria	Gammaproteobacteria	Alteromonadales	Shewanellaceae	Shewanella	Candidatus_Rosenkranzia
Taxa_577	Bacteria	Proteobacteria	Alphaproteobacteria	Rhizobiales	Rhizobiaceae	uncultured	uncultured_bacterium
Taxa_578	Bacteria	Bacteroidota	Bacteroidia	Flavobacteriales	Flavobacteriaceae	Gillisia	Gillisia_illustrilutea
Taxa_579	Bacteria	Proteobacteria	Gammaproteobacteria	Alteromonadales	Pseudoalteromonadaceae	Pseudoalteromonas	Pseudoalteromonas_tunicata
Taxa_580	Bacteria	Proteobacteria	Gammaproteobacteria	Halothiobacillales	Halothiobacillaceae	Thiovirga	uncultured_bacterium
Taxa_586	Bacteria	Proteobacteria	Gammaproteobacteria	Alteromonadales	Marinobacteraceae	Marinobacter	Marinobacter_algicola
Taxa_587	Bacteria	Proteobacteria	Gammaproteobacteria	Enterobacterales	Morganellaceae	Candidatus_Rosenkranzia	Candidatus_Rosenkranzia
Taxa_588	Bacteria	Proteobacteria	Alphaproteobacteria	Rhodobacterales	Rhodobacteraceae	Pseudohongiella	uncultured_Marinomonas
Taxa_590	Bacteria	Proteobacteria	Gammaproteobacteria	Alteromonadales	Alteromonadaceae	Vibrio	uncultured_bacterium
Taxa_591	Bacteria	Proteobacteria	Alphaproteobacteria	Rhodobacterales	Rhodobacteraceae	Falsirhodobacter	uncultured_bacterium
Taxa_593	Bacteria	Proteobacteria	Gammaproteobacteria	Burkholderiales	Comamonadaceae	uncultured	uncultured_bacterium
Taxa_597	Bacteria	Proteobacteria	Alphaproteobacteria	Rhodospirillales	Terasakiellaceae	Terasakiella	uncultured_bacterium
Taxa_598	Bacteria	Proteobacteria	Alphaproteobacteria	Rhodobacterales	Rhodobacteraceae	Thioclava	Thioclava_sp.
Taxa_600	Bacteria	Proteobacteria	Alphaproteobacteria	Rhodobacterales	Rhodobacteraceae	Jannaschia	Rhodobacteraceae_bacterium
Taxa_601	Bacteria	Actinobacteriota	Acidimicrobiia	Microtrichales	Microtrichaceae	uncultured	uncultured_bacterium
Taxa_603	Bacteria	Proteobacteria	Alphaproteobacteria	Rickettsiales	SM2D12	SM2D12	uncultured_bacterium
Taxa_604	Bacteria	Proteobacteria	Alphaproteobacteria	Rhodobacterales	Rhodobacteraceae	uncultured	uncultured_Alphaproteobacteria
Taxa_605	Bacteria	Firmicutes	Clostridia	Clostridiales	Clostridiaceae	Sarcina	uncultured_bacterium
Taxa_606	Bacteria	Proteobacteria	Alphaproteobacteria	Rhodobacterales	Rhodobacteraceae	Lentibacter	uncultured_marine
Taxa_607	Bacteria	Proteobacteria	Gammaproteobacteria	Pseudomonadales	Moraxellaceae	Psychrobacter	unidentified_marine
Taxa_609	Bacteria	Proteobacteria	Alphaproteobacteria	Rhodobacterales	Rhodobacteraceae	Paracoccus	Paracoccus_marcusii
Taxa_610	Bacteria	Proteobacteria	Gammaproteobacteria	Oceanospirillales	Marinobacteraceae	Marinobacter	uncultured_bacterium
Taxa_613	Bacteria	Proteobacteria	Gammaproteobacteria	Pseudomonadales	Moraxellaceae	uncultured	uncultured_bacterium
Taxa_614	Bacteria	Proteobacteria	Alphaproteobacteria	Rhodobacterales	Rhodobacteraceae	Thioclava	uncultured_bacterium
Taxa_615	Bacteria	Proteobacteria	Alphaproteobacteria	Rhodobacterales	Rhodobacteraceae	Tateyamaria	uncultured_bacterium
Taxa_617	Bacteria	Proteobacteria	Alphaproteobacteria	Rhodobacterales	Rhodobacteraceae	Roseobacter	uncultured_bacterium
Taxa_618	Bacteria	Proteobacteria	Gammaproteobacteria	Enterobacterales	Enterobacteriaceae	Lelliottia	Pantoea_agglomerans
Taxa_620	Bacteria	Proteobacteria	Gammaproteobacteria	Alteromonadales	Alteromonadaceae	Agaribacter	uncultured_bacterium
Taxa_621	Bacteria	Proteobacteria	Alphaproteobacteria	Rhodobacterales	Rhodobacteraceae	SAR86_clade	uncultured_bacterium
Taxa_622	Bacteria	Proteobacteria	Gammaproteobacteria	Alteromonadales	Moritellaceae	uncultured	uncultured_gamma
Taxa_623	Bacteria	Proteobacteria	Alphaproteobacteria	Rhodospirillales	Rhodospirillaceae	BRH-c57	uncultured_bacterium
Taxa_626	Bacteria	Proteobacteria	Gammaproteobacteria	Vibrionales	Vibrionaceae	Photobacterium	Photobacterium_sp.
Taxa_628	Bacteria	Proteobacteria	Gammaproteobacteria	Pseudomonadales	Pseudomonadaceae	Pseudomonas	Pseudomonas_oleovorans
Taxa_629	Bacteria	Gemmatimonadota	BD2-11_terrestrial_group	BD2-11_terrestrial_group	BD2-11_terrestrial_group	BD2-11_terrestrial_group	uncultured_bacterium
Taxa_630	Bacteria	Bacteroidota	Bacteroidia	Flavobacteriales	Flavobacteriaceae	Flavobacterium	uncultured_bacterium
Taxa_631	Bacteria	Desulfobacterota	Sva0485	Sva0485	Sva0485	Sva0485	uncultured_delta
Taxa_632	Bacteria	Nitrospinota	Nitrospinia	Nitrospinales	Nitrospinaceae	LS-NOB	uncultured_bacterium
Taxa_633	Bacteria	NB1-j	NB1-j	NB1-j	NB1-j	NB1-j	uncultured_bacterium
Taxa_634	Bacteria	Proteobacteria	Alphaproteobacteria	Rhodospirillales	Thalassospiraceae	Thalassospira	uncultured_Thalassospira
Taxa_635	Bacteria	Sva0485	Sva0485	Sva0485	Sva0485	Sva0485	uncultured_bacterium
Taxa_636	Bacteria	Proteobacteria	Gammaproteobacteria	Oceanospirillales	Saccharospirillaceae	Oleispira	uncultured_gamma
Taxa_637	Bacteria	Sva0485	Sva0485	Sva0485	Sva0485	Sva0485	uncultured_delta
Taxa_639	Bacteria	Firmicutes	Bacilli	Lactobacillales	Lactobacillaceae	Lactobacillus	Lactobacillus_helveticus
Taxa_640	Bacteria	Proteobacteria	Alphaproteobacteria	Caulobacterales	Rhodobacteraceae	Marinicaulis	uncultured_bacterium
Taxa_641	Bacteria	Chloroflexi	Anaerolineae	Anaerolineales	Anaerolineaceae	uncultured	uncultured_bacterium
Taxa_642	Bacteria	Desulfobacterota	Sva0485	Sva0485	Sva0485	Sva0485	uncultured_bacterium
Taxa_643	Bacteria	Acidobacteriota	Thermoanaerobaculia	Thermoanaerobaculales	Thermoanaerobaculaceae	Subgroup_10	uncultured_bacterium
Taxa_644	Bacteria	Proteobacteria	Alphaproteobacteria	Rhodobacterales	Rhodobacteraceae	SM2D12	uncultured_bacterium
Taxa_645	Bacteria	Firmicutes	Bacilli	Lactobacillales	Lactobacillaceae	Lactobacillus	uncultured_bacterium
Taxa_648	Bacteria	Proteobacteria	Gammaproteobacteria	Pseudomonadales	Pseudomonadaceae	Pseudomonas	uncultured_Pseudomonas
Taxa_649	Bacteria	Bacteroidota	Bacteroidia	Flavobacteriales	Flavobacteriaceae	Winogradskyella	Winogradskyella_sp.
Taxa_650	Bacteria	Bacteroidota	Bacteroidia	Flavobacteriales	Flavobacteriaceae	Polaribacter	uncultured_Bacteroidetes
Taxa_652	Bacteria	Proteobacteria	Gammaproteobacteria	Alteromonadales	Alteromonadaceae	Agaribacter	Idiomarina_sp.
Taxa_653	Bacteria	Proteobacteria	Alphaproteobacteria	SAR11_clade	Clade_I	Clade_Ia	unidentified_marine
Taxa_654	Archaea	Thermoplasmatota	Thermoplasmata	Marine_Group_II	Marine_Group_II	Marine_Group_II	uncultured_archaeon
Taxa_655	Bacteria	Proteobacteria	Alphaproteobacteria	Rhodobacterales	Rhodobacteraceae	SAR86_clade	uncultured_marine
Taxa_657	Bacteria	Proteobacteria	Alphaproteobacteria	SAR11_clade	Clade_II	Clade_II	uncultured_marine
Taxa_658	Bacteria	Proteobacteria	Gammaproteobacteria	Alteromonadales	Shewanellaceae	Shewanella	Shewanella_putrefaciens
Taxa_659	Bacteria	Proteobacteria	Gammaproteobacteria	Enterobacterales	Erwiniaceae	Izhakiella	uncultured_bacterium
Taxa_660	Bacteria	Proteobacteria	Gammaproteobacteria	Cellvibrionales	Cellvibrionaceae	uncultured	uncultured_bacterium
Taxa_661	Bacteria	Bacteroidota	Bacteroidia	Flavobacteriales	Flavobacteriaceae	Galbibacter	Galbibacter_sp.
Taxa_662	Bacteria	Proteobacteria	Gammaproteobacteria	Alteromonadales	Alteromonadaceae	Photobacterium	uncultured_bacterium
Taxa_663	Bacteria	Proteobacteria	Gammaproteobacteria	Alteromonadales	Alteromonadaceae	uncultured	uncultured_gamma
Taxa_664	Archaea	Thermoplasmatota	Thermoplasmata	Marine_Group_II	Marine_Group_II	Marine_Group_II	uncultured_marine
Taxa_665	Bacteria	Proteobacteria	Alphaproteobacteria	Rhizobiales	Beijerinckiaceae	Methylobacterium-Methylorubrum	Methylobacterium_sp.
Taxa_666	Bacteria	Firmicutes	Bacilli	Lactobacillales	Carnobacteriaceae	Dolosigranulum	uncultured_bacterium
Taxa_670	Bacteria	Proteobacteria	Alphaproteobacteria	Kiloniellales	Kiloniellaceae	Kiloniella	uncultured_bacterium
Taxa_672	Bacteria	Proteobacteria	Gammaproteobacteria	Alteromonadales	Pseudoalteromonadaceae	Pseudoalteromonas	Pseudoalteromonas_carrageenovora
Taxa_673	Bacteria	Firmicutes	Thermoanaerobacteria	Thermoanaerobacterales	Thermoanaerobacteraceae	Thermoanaerobacter	Thermoanaerobacter_brockii
Taxa_674	Bacteria	Proteobacteria	Gammaproteobacteria	Vibrionales	Vibrionaceae	Vibrio	Vibrio_alginolyticus
Taxa_676	Bacteria	Proteobacteria	Gammaproteobacteria	Alteromonadales	Alteromonadaceae	Alteromonas	uncultured_Alteromonas
Taxa_677	Bacteria	Proteobacteria	Alphaproteobacteria	Rhodobacterales	Rhodobacteraceae	Albimonas	uncultured_bacterium
Taxa_679	Bacteria	Proteobacteria	Alphaproteobacteria	Rhodobacterales	Rhodobacteraceae	Pseudoruegeria	Pseudoruegeria_haliotis
Taxa_680	Bacteria	Proteobacteria	Alphaproteobacteria	Rhodobacterales	Rhodobacteraceae	Ruegeria	bacterium
Taxa_683	Bacteria	Bacteroidota	Bacteroidia	Flavobacteriales	Flavobacteriaceae	Algibacter	uncultured_bacterium
Taxa_685	Bacteria	Verrucomicrobiota	Verrucomicrobiae	Verrucomicrobiales	Verrucomicrobiaceae	uncultured	uncultured_bacterium
Taxa_686	Bacteria	Bdellovibrionota	Bdellovibrionia	Bdellovibrionales	Bdellovibrionaceae	Bdellovibrio	uncultured_bacterium
Taxa_688	Bacteria	Proteobacteria	Gammaproteobacteria	Oceanospirillales	Halomonadaceae	Cobetia	Cobetia_sp.
Taxa_689	Bacteria	Proteobacteria	Gammaproteobacteria	Xanthomonadales	Xanthomonadaceae	Stenotrophomonas	uncultured_bacterium
Taxa_690	Bacteria	Proteobacteria	Gammaproteobacteria	Burkholderiales	Comamonadaceae	Polaromonas	uncultured_bacterium
Taxa_691	Bacteria	Bacteroidota	Bacteroidia	Cytophagales	Hymenobacteraceae	Hymenobacter	uncultured_bacterium
Taxa_692	Bacteria	Actinobacteriota	Actinobacteria	Micrococcales	Dermacoccaceae	Dermacoccus	Dermacoccus_sp.
Taxa_693	Bacteria	Bacteroidota	Bacteroidia	Flavobacteriales	Flavobacteriaceae	Formosa	uncultured_bacterium
Taxa_695	Bacteria	Campilobacterota	Campylobacteria	Campylobacterales	Arcobacteraceae	Sulfurimonas	uncultured_bacterium
Taxa_698	Bacteria	Proteobacteria	Gammaproteobacteria	Xanthomonadales	Xanthomonadaceae	Stenotrophomonas	Stenotrophomonas_maltophilia
Taxa_704	Bacteria	Bacteroidota	Bacteroidia	Flavobacteriales	Flavobacteriaceae	Psychroserpens	uncultured_bacterium
Taxa_705	Bacteria	Firmicutes	Bacilli	Staphylococcales	Staphylococcaceae	Staphylococcus	Staphylococcus_epidermidis
Taxa_707	Bacteria	Proteobacteria	Alphaproteobacteria	Rhodospirillales	Magnetospiraceae	Magnetospira	uncultured_marine
Taxa_708	Bacteria	Proteobacteria	Gammaproteobacteria	Xanthomonadales	Xanthomonadaceae	Stenotrophomonas	Pseudomonas_sp.
Taxa_709	Bacteria	Proteobacteria	Alphaproteobacteria	SAR11_clade	Clade_III	Clade_III	uncultured_bacterium
Taxa_710	Bacteria	Proteobacteria	Gammaproteobacteria	Alteromonadales	Shewanellaceae	Shewanella	Shewanella_morhuae
Taxa_711	Bacteria	Proteobacteria	Gammaproteobacteria	Cellvibrionales	Spongiibacteraceae	uncultured	marine_gamma
Taxa_712	Bacteria	Proteobacteria	Gammaproteobacteria	Methylococcales	Cycloclasticaceae	Cycloclasticus	uncultured_Thiotrichales
Taxa_713	Bacteria	Proteobacteria	Gammaproteobacteria	Aeromonadales	Aeromonadaceae	Aeromonas	uncultured_Aeromonas
Taxa_715	Bacteria	Proteobacteria	Alphaproteobacteria	Rhizobiales	Rhizobiaceae	Allorhizobium-Neorhizobium-Pararhizobium-Rhizobium	uncultured_bacterium
Taxa_716	Bacteria	Proteobacteria	Gammaproteobacteria	Burkholderiales	Gallionellaceae	Sideroxydans	uncultured_bacterium
Taxa_717	Bacteria	Proteobacteria	Alphaproteobacteria	Rhodobacterales	Rhodobacteraceae	uncultured	uncultured_Rhodobacteraceae
Taxa_718	Bacteria	Actinobacteriota	Acidimicrobiia	Microtrichales	Ilumatobacteraceae	uncultured	uncultured_bacterium
Taxa_721	Bacteria	Proteobacteria	Gammaproteobacteria	Enterobacterales	Enterobacteriaceae	Escherichia-Shigella	metagenome
Taxa_722	Bacteria	Proteobacteria	Alphaproteobacteria	Rhodobacterales	Rhodobacteraceae	Sulfitobacter	Wigglesworthia_glossinidia
Taxa_723	Bacteria	Proteobacteria	Gammaproteobacteria	Nitrosococcales	Methylophagaceae	Cycloclasticus	uncultured_bacterium
Taxa_724	Bacteria	Proteobacteria	Alphaproteobacteria	Sphingomonadales	Sphingomonadaceae	Erythrobacter	Erythrobacter_sp.
Taxa_727	Bacteria	Proteobacteria	Alphaproteobacteria	Rhodobacterales	Rhodobacteraceae	Sulfitobacter	Jannaschia_sp.
Taxa_728	Bacteria	Bacteroidota	Bacteroidia	Flavobacteriales	Flavobacteriaceae	Flavicella	uncultured_bacterium
Taxa_729	Bacteria	Proteobacteria	Alphaproteobacteria	Rhodobacterales	Rhodobacteraceae	Rhodobacteraceae	uncultured_bacterium
Taxa_732	Bacteria	Proteobacteria	Gammaproteobacteria	Enterobacterales	Enterobacteriaceae	Enterobacter	Klebsiella_oxytoca
Taxa_734	Bacteria	Firmicutes	Bacilli	Lactobacillales	Listeriaceae	Brochothrix	Brochothrix_thermosphacta
Taxa_736	Bacteria	Proteobacteria	Gammaproteobacteria	Alteromonadales	Shewanellaceae	Shewanella	Shewanella_donghaensis
Taxa_738	Bacteria	Proteobacteria	Gammaproteobacteria	Oceanospirillales	Saccharospirillaceae	uncultured	uncultured_bacterium
Taxa_739	Bacteria	Proteobacteria	Alphaproteobacteria	Rhodobacterales	Rhodobacteraceae	Shimia	uncultured_Marinomonas
Taxa_740	Bacteria	Proteobacteria	Alphaproteobacteria	SAR11_clade	Clade_I	uncultured	uncultured_bacterium
Taxa_741	Bacteria	Proteobacteria	Alphaproteobacteria	Rhodospirillales	Magnetospiraceae	Magnetospira	uncultured_bacterium
Taxa_742	Bacteria	Proteobacteria	Gammaproteobacteria	Alteromonadales	Shewanellaceae	Shewanella	uncultured_Shewanella
Taxa_743	Bacteria	Proteobacteria	Gammaproteobacteria	Burkholderiales	Comamonadaceae	Schlegelella	uncultured_bacterium
Taxa_744	Bacteria	Acidobacteriota	Vicinamibacteria	Vicinamibacterales	Vicinamibacteraceae	Vicinamibacteraceae	uncultured_bacterium
Taxa_745	Bacteria	Proteobacteria	Gammaproteobacteria	Pasteurellales	Pasteurellaceae	Haemophilus	uncultured_organism
Taxa_747	Bacteria	Proteobacteria	Gammaproteobacteria	Alteromonadales	Vibrionaceae	Photobacterium	uncultured_bacterium
Taxa_748	Bacteria	Proteobacteria	Gammaproteobacteria	Vibrionales	Vibrionaceae	Aliivibrio	uncultured_bacterium
Taxa_749	Bacteria	Proteobacteria	Gammaproteobacteria	Oceanospirillales	Saccharospirillaceae	uncultured	uncultured_gamma
Taxa_750	Bacteria	Proteobacteria	Alphaproteobacteria	Rhodobacterales	Rhodobacteraceae	Thalassobius	uncultured_Thalassobius
Taxa_753	Bacteria	Planctomycetota	Planctomycetes	Pirellulales	Pirellulaceae	Rhodopirellula	uncultured_bacterium
Taxa_754	Bacteria	Bacteroidota	Bacteroidia	Flavobacteriales	Flavobacteriaceae	Winogradskyella	uncultured_Sediminibacter
Taxa_755	Bacteria	Proteobacteria	Gammaproteobacteria	Alteromonadales	Alteromonadaceae	uncultured	Alteromonas_sp.
Taxa_756	Bacteria	Bacteroidota	Bacteroidia	Flavobacteriales	Flavobacteriaceae	Pseudofulvibacter	uncultured_Flavobacteriaceae
Taxa_757	Bacteria	Proteobacteria	Gammaproteobacteria	Pseudomonadales	Moraxellaceae	Psychrobacter	uncultured_Psychrobacter
Taxa_759	Bacteria	Proteobacteria	Gammaproteobacteria	Enterobacterales	Enterobacteriaceae	Escherichia-Shigella	Shigella_flexneri
Taxa_760	Bacteria	Proteobacteria	Gammaproteobacteria	Alteromonadales	Alteromonadaceae	Alteromonas	bacterium_K3
Taxa_761	Bacteria	Proteobacteria	Alphaproteobacteria	Rhodobacterales	Rhodobacteraceae	Ruegeria	uncultured_bacterium
Taxa_762	Bacteria	Firmicutes	Desulfotomaculia	Desulfotomaculales	Desulfotomaculales	Desulfofundulus	Desulfofundulus_kuznetsovii
Taxa_763	Bacteria	Proteobacteria	Alphaproteobacteria	Sphingomonadales	Sphingomonadaceae	Novosphingobium	uncultured_bacterium
Taxa_764	Bacteria	Proteobacteria	Gammaproteobacteria	Oceanospirillales	Alcanivoracaceae1	Alcanivorax	bacterium_MML2016
Taxa_765	Bacteria	Proteobacteria	Alphaproteobacteria	uncultured	uncultured	uncultured	uncultured_bacterium
Taxa_766	Bacteria	Actinobacteriota	Actinobacteria	Corynebacteriales	Mycobacteriaceae	Mycobacterium	Mycobacterium_sp.
Taxa_767	Bacteria	Proteobacteria	Gammaproteobacteria	Alteromonadales	Idiomarinaceae	Idiomarina	uncultured_bacterium
Taxa_771	Bacteria	Proteobacteria	Gammaproteobacteria	Cellvibrionales	Porticoccaceae	SAR92_clade	uncultured_bacterium
Taxa_774	Bacteria	Proteobacteria	Gammaproteobacteria	KI89A_clade	KI89A_clade	KI89A_clade	uncultured_marine
Taxa_775	Bacteria	Firmicutes	Clostridia	Peptostreptococcales-Tissierellales	Peptostreptococcaceae	Romboutsia	Romboutsia_hominis
Taxa_780	Bacteria	Proteobacteria	Gammaproteobacteria	Chromatiales	Sedimenticolaceae	uncultured	uncultured_bacterium
Taxa_781	Bacteria	Proteobacteria	Alphaproteobacteria	Caulobacterales	Hyphomonadaceae	Litorimonas	uncultured_bacterium
Taxa_782	Bacteria	Proteobacteria	Gammaproteobacteria	Alteromonadales	Marinobacteraceae	Marinobacter	bacterium_ROC6-1
Taxa_784	Bacteria	Proteobacteria	Gammaproteobacteria	Alteromonadales	Alteromonadaceae	Alteromonas	uncultured_gamma
Taxa_785	Bacteria	Proteobacteria	Gammaproteobacteria	Burkholderiales	Rhodocyclaceae	Azoarcus	uncultured_bacterium
Taxa_786	Bacteria	Proteobacteria	Gammaproteobacteria	Oceanospirillales	Pseudohongiellaceae	Pseudohongiella	uncultured_gamma
Taxa_787	Bacteria	Proteobacteria	Alphaproteobacteria	Rhizobiales	Stappiaceae	Labrenzia	Labrenzia_sp.
Taxa_789	Bacteria	Proteobacteria	Alphaproteobacteria	Rhodobacterales	Rhodobacteraceae	Dinoroseobacter	uncultured_bacterium
Taxa_794	Bacteria	Firmicutes	Negativicutes	Veillonellales-Selenomonadales	Veillonellaceae	Megasphaera	uncultured_bacterium
Taxa_797	Bacteria	Firmicutes	Clostridia	Oscillospirales	Ruminococcaceae	Ruminococcus	uncultured_bacterium
Taxa_799	Bacteria	Proteobacteria	Gammaproteobacteria	Alteromonadales	Pseudoalteromonadaceae	Pseudoalteromonas	Pseudoalteromonas_xiamenensis
Taxa_801	Bacteria	Firmicutes	Bacilli	Lactobacillales	Enterococcaceae	Enterococcus	uncultured_bacterium
Taxa_802	Bacteria	Proteobacteria	Gammaproteobacteria	Burkholderiales	Comamonadaceae	Comamonas	bacterium_endosymbiont
Taxa_803	Bacteria	Proteobacteria	Gammaproteobacteria	Pseudomonadales	Moraxellaceae	Psychrobacter	uncultured_gamma
Taxa_804	Bacteria	Proteobacteria	Gammaproteobacteria	Pseudomonadales	Moraxellaceae	Psychrobacter	Psychrobacter_sp.
Taxa_805	Bacteria	Proteobacteria	Gammaproteobacteria	Alteromonadales	Marinobacteraceae	Marinobacter	uncultured_bacterium
Taxa_806	Bacteria	Proteobacteria	Alphaproteobacteria	Rhodobacterales	Rhodobacteraceae	Yoonia-Loktanella	uncultured_bacterium
Taxa_807	Bacteria	Proteobacteria	Gammaproteobacteria	Nitrosococcales	Methylophagaceae	Marine_Methylotrophic_Group_3	uncultured_Thiotrichales
Taxa_808	Bacteria	Proteobacteria	Gammaproteobacteria	Burkholderiales	Comamonadaceae	Delftia	Delftia_sp.
Taxa_809	Bacteria	Proteobacteria	Gammaproteobacteria	Cellvibrionales	Halieaceae	OM60(NOR5)_clade	uncultured_gamma
Taxa_810	Bacteria	Actinobacteriota	Actinobacteria	Micrococcales	Ruaniaceae	Ruania	uncultured_bacterium
Taxa_811	Bacteria	Proteobacteria	Gammaproteobacteria	Alteromonadales	Alteromonadaceae	Rheinheimera	uncultured_bacterium
Taxa_812	Bacteria	Firmicutes	Bacilli	Staphylococcales	Staphylococcaceae	Staphylococcus	uncultured_bacterium
Taxa_813	Archaea	Thermoplasmatota	Thermoplasmata	Marine_Group_II	Marine_Group_II	Marine_Group_II	hydrothermal_vent
Taxa_814	Bacteria	Actinobacteriota	Actinobacteria	Actinomycetales	Actinomycetaceae	Actinomyces	uncultured_bacterium
Taxa_815	Bacteria	Proteobacteria	Gammaproteobacteria	Burkholderiales	Comamonadaceae	uncultured	uncultured_gamma
Taxa_816	Bacteria	Proteobacteria	Gammaproteobacteria	Alteromonadales	Marinobacteraceae	Marinobacter	Marinobacter_mobilis
Taxa_817	Bacteria	Proteobacteria	Alphaproteobacteria	Rhizobiales	Xanthobacteraceae	Xanthobacteraceae	uncultured_bacterium
Taxa_818	Bacteria	Proteobacteria	Gammaproteobacteria	Oceanospirillales	Shewanellaceae	Shewanella	uncultured_bacterium
Taxa_819	Bacteria	Bacteroidota	Bacteroidia	Flavobacteriales	Flavobacteriaceae	Aquimarina	Salegentibacter_echinorum
Taxa_821	Bacteria	Bacteroidota	Bacteroidia	Flavobacteriales	NS9_marine_group	NS9_marine_group	uncultured_bacterium
Taxa_822	Bacteria	Proteobacteria	Alphaproteobacteria	Rhizobiales	Xanthobacteraceae	Bradyrhizobium	uncultured_bacterium
Taxa_823	Bacteria	Actinobacteriota	Actinobacteria	Corynebacteriales	Corynebacteriaceae	Corynebacterium	Corynebacterium_vitaeruminis
Taxa_824	Bacteria	Bacteroidota	Bacteroidia	Flavobacteriales	Weeksellaceae	Cloacibacterium	uncultured_bacterium
Taxa_825	Bacteria	Fusobacteriota	Fusobacteriia	Fusobacteriales	Leptotrichiaceae	Leptotrichia	uncultured_bacterium
Taxa_829	Bacteria	Proteobacteria	Gammaproteobacteria	Burkholderiales	Comamonadaceae	Diaphorobacter	uncultured_bacterium
Taxa_830	Bacteria	Proteobacteria	Alphaproteobacteria	Sphingomonadales	Sphingomonadaceae	Sphingobium	uncultured_bacterium
Taxa_832	Bacteria	Proteobacteria	Gammaproteobacteria	Enterobacterales	Enterobacteriaceae	Salmonella	uncultured_bacterium
Taxa_833	Bacteria	Proteobacteria	Gammaproteobacteria	Enterobacterales	Pectobacteriaceae	Sodalis	uncultured_bacterium
Taxa_834	Bacteria	Proteobacteria	Alphaproteobacteria	Rhizobiales	Rhizobiaceae	Aurantimonas	uncultured_bacterium
Taxa_835	Bacteria	Firmicutes	Negativicutes	Veillonellales-Selenomonadales	Veillonellaceae	Veillonella	uncultured_bacterium
Taxa_836	Bacteria	Proteobacteria	Gammaproteobacteria	Cellvibrionales	Halieaceae	OM60(NOR5)_clade	uncultured_bacterium
Taxa_837	Bacteria	Proteobacteria	Gammaproteobacteria	Alteromonadales	Alteromonadaceae	Glaciecola	uncultured_Cellulophaga
Taxa_842	Bacteria	Firmicutes	Negativicutes	Veillonellales-Selenomonadales	Veillonellaceae	Dialister	uncultured_bacterium
Taxa_844	Bacteria	Proteobacteria	Gammaproteobacteria	Acidithiobacillales	Acidithiobacillaceae	KCM-B-112	uncultured_bacterium
Taxa_846	Bacteria	Proteobacteria	Gammaproteobacteria	Burkholderiales	Comamonadaceae	Acidovorax	uncultured_bacterium
Taxa_847	Bacteria	Proteobacteria	Gammaproteobacteria	Alteromonadales	Pseudoalteromonadaceae	Pseudoalteromonas	uncultured_bacterium
Taxa_848	Bacteria	Proteobacteria	Gammaproteobacteria	Alteromonadales	Oleiphilaceae	Oleiphilus	uncultured_bacterium
Taxa_849	Bacteria	Proteobacteria	Gammaproteobacteria	Enterobacterales	Morganellaceae	Buchnera	Buchnera_aphidicola
Taxa_850	Bacteria	Proteobacteria	Gammaproteobacteria	Alteromonadales	Shewanellaceae	Shewanella	Serratia_symbiotica
Taxa_851	Bacteria	Proteobacteria	Gammaproteobacteria	SAR86_clade	SAR86_clade	SAR86_clade	uncultured_bacterium
Taxa_852	Bacteria	Proteobacteria	Alphaproteobacteria	SAR11_clade	Clade_IV	Clade_IV	uncultured_bacterium
Taxa_853	Bacteria	Chloroflexi	Dehalococcoidia	SAR202_clade	SAR202_clade	SAR202_clade	marine_metagenome
Taxa_854	Bacteria	Bacteroidota	Bacteroidia	Flavobacteriales	Flavobacteriaceae	Nonlabens	uncultured_bacterium
Taxa_856	Bacteria	Proteobacteria	Gammaproteobacteria	Alteromonadales	Moritellaceae	Moritella	Moritella_sp.
Taxa_857	Bacteria	Proteobacteria	Alphaproteobacteria	SAR11_clade	Clade_I	Clade_Ia	uncultured_marine
Taxa_859	Bacteria	Planctomycetota	Planctomycetes	Pirellulales	Pirellulaceae	uncultured	uncultured_bacterium
Taxa_860	Bacteria	Proteobacteria	Alphaproteobacteria	Rhodobacterales	Rhodobacteraceae	Lentibacter	uncultured_bacterium
Taxa_861	Bacteria	Proteobacteria	Alphaproteobacteria	SAR11_clade	Clade_I	Clade_Ib	uncultured_bacterium
Taxa_863	Bacteria	Bacteroidota	Bacteroidia	Flavobacteriales	Flavobacteriaceae	NS4_marine_group	uncultured_Bacteroidetes
Taxa_866	Bacteria	Planctomycetota	Planctomycetes	Planctomycetales	Rubinisphaeraceae	uncultured	uncultured_bacterium
Taxa_868	Bacteria	Myxococcota	Myxococcia	Myxococcales	Myxococcaceae	P3OB-42	uncultured_bacterium
Taxa_870	Bacteria	Proteobacteria	Alphaproteobacteria	Oceanospirillales	Endozoicomonadaceae	Endozoicomonas	uncultured_bacterium
Taxa_871	Bacteria	Proteobacteria	Alphaproteobacteria	Micavibrionales	uncultured	uncultured	metagenome
Taxa_872	Bacteria	Proteobacteria	Gammaproteobacteria	Alteromonadales	Alcanivoracaceae1	Alcanivorax	uncultured_bacterium
Taxa_873	Bacteria	Proteobacteria	Alphaproteobacteria	Kordiimonadales	Kordiimonadaceae	Kordiimonas	uncultured_bacterium
Taxa_874	Bacteria	Proteobacteria	Alphaproteobacteria	Rhodospirillales	Thalassospiraceae	Thalassospira	uncultured_organism
Taxa_875	Bacteria	Firmicutes	Clostridia	Peptostreptococcales-Tissierellales	Dethiosulfatibacteraceae	Dethiosulfatibacter	uncultured_bacterium
Taxa_879	Bacteria	Proteobacteria	Alphaproteobacteria	Rhodobacterales	Rhodobacteraceae	Ruegeria	uncultured_Marinomonas
Taxa_882	Bacteria	Proteobacteria	Gammaproteobacteria	Aeromonadales	Aeromonadaceae	uncultured	uncultured_bacterium
Taxa_883	Bacteria	Proteobacteria	Gammaproteobacteria	Pseudomonadales	Moraxellaceae	Alkanindiges	uncultured_bacterium
Taxa_886	Bacteria	Proteobacteria	Alphaproteobacteria	Rhodobacterales	Rhodobacteraceae	Leisingera	uncultured_bacterium
Taxa_888	Bacteria	Proteobacteria	Alphaproteobacteria	Rhizobiales	Beijerinckiaceae	uncultured	uncultured_bacterium
Taxa_891	Bacteria	Desulfobacterota	Desulfuromonadia	Bradymonadales	Bradymonadales	Bradymonadales	uncultured_bacterium
Taxa_892	Bacteria	Bacteroidota	Bacteroidia	Flavobacteriales	Flavobacteriaceae	NS5_marine_group	uncultured_Flavobacteriia
Taxa_895	Bacteria	Proteobacteria	Alphaproteobacteria	Rhodobacterales	Rhodobacteraceae	uncultured	marine_bacterium
Taxa_896	Bacteria	Proteobacteria	Gammaproteobacteria	Nitrosococcales	Methylophagaceae	Marine_Methylotrophic_Group_3	uncultured_bacterium
Taxa_897	Bacteria	Proteobacteria	Alphaproteobacteria	Rhodobacterales	Rhodobacteraceae	Thalassococcus	uncultured_bacterium
Taxa_899	Bacteria	Proteobacteria	Alphaproteobacteria	Sneathiellales	Sneathiellaceae	Sneathiella	uncultured_Alphaproteobacteria
Taxa_901	Bacteria	Proteobacteria	Gammaproteobacteria	Alteromonadales	Idiomarinaceae	Idiomarina	Idiomarina_loihiensis
Taxa_905	Bacteria	Bacteroidota	Bacteroidia	Flavobacteriales	Flavobacteriaceae	NS2b_marine_group	uncultured_bacterium
Taxa_906	Bacteria	Proteobacteria	Alphaproteobacteria	Caulobacterales	Hyphomonadaceae	uncultured	uncultured_organism
Taxa_907	Bacteria	Bacteroidota	Bacteroidia	Flavobacteriales	Flavobacteriaceae	Aquimarina	uncultured_bacterium
Taxa_908	Bacteria	Proteobacteria	Alphaproteobacteria	Rhodobacterales	Rhodobacteraceae	Hyphomonas	uncultured_bacterium
Taxa_909	Bacteria	Proteobacteria	Gammaproteobacteria	Enterobacterales	Morganellaceae	uncultured	uncultured_bacterium
Taxa_910	Bacteria	Proteobacteria	Alphaproteobacteria	Rhodobacterales	Rhodobacteraceae	Sulfitobacter	uncultured_Sulfitobacter
Taxa_911	Bacteria	Proteobacteria	Alphaproteobacteria	Rhodobacterales	Rhodobacteraceae	PS1_clade	uncultured_bacterium
Taxa_912	Bacteria	Proteobacteria	Alphaproteobacteria	Rhizobiales	A0839	A0839	uncultured_bacterium
Taxa_914	Bacteria	Proteobacteria	Gammaproteobacteria	Oceanospirillales	Halomonadaceae	Cobetia	Cobetia_marina
Taxa_915	Bacteria	Proteobacteria	Gammaproteobacteria	Vibrionales	Vibrionaceae	Aliivibrio	Aliivibrio_logei
Taxa_916	Bacteria	Proteobacteria	Alphaproteobacteria	Rhodobacterales	uncultured	uncultured	metagenome
Taxa_919	Bacteria	Proteobacteria	Gammaproteobacteria	Oceanospirillales	Yersiniaceae	Serratia	uncultured_bacterium
Taxa_921	Bacteria	Proteobacteria	Gammaproteobacteria	Oceanospirillales	Hahellaceae	Hahella	uncultured_bacterium
Taxa_928	Bacteria	Proteobacteria	Gammaproteobacteria	Cellvibrionales	Microbulbiferaceae	Microbulbifer	Microbulbifer_variabilis
Taxa_929	Bacteria	Proteobacteria	Alphaproteobacteria	Rhodobacterales	Rhodobacteraceae	Celeribacter	Marivita_sp.
Taxa_930	Bacteria	Proteobacteria	Gammaproteobacteria	Cellvibrionales	Porticoccaceae	C1-B045	uncultured_bacterium
Taxa_931	Bacteria	Chloroflexi	Dehalococcoidia	SAR202_clade	SAR202_clade	SAR202_clade	uncultured_deep-sea
Taxa_932	Bacteria	Proteobacteria	Alphaproteobacteria	Rhodobacterales	Rhodobacteraceae	Jannaschia	Jannaschia_sp.
Taxa_933	Bacteria	Proteobacteria	Gammaproteobacteria	Aeromonadales	Aeromonadaceae	Aeromonas	Aeromonas_veronii
Taxa_934	Bacteria	Proteobacteria	Gammaproteobacteria	Oceanospirillales	Nitrincolaceae	Oleibacter	uncultured_bacterium
Taxa_936	Bacteria	Proteobacteria	Alphaproteobacteria	Caulobacterales	uncultured	uncultured	uncultured_bacterium
Taxa_937	Bacteria	Bacteroidota	Bacteroidia	Flavobacteriales	Flavobacteriaceae	uncultured	uncultured_Bacteroidetes
Taxa_938	Bacteria	Bacteroidota	Bacteroidia	Flavobacteriales	NS11-12_marine_group	NS11-12_marine_group	uncultured_bacterium
Taxa_941	Bacteria	Proteobacteria	Alphaproteobacteria	Rhodospirillales	Rhodospirillaceae	uncultured	uncultured_Alphaproteobacteria
Taxa_942	Bacteria	Proteobacteria	Gammaproteobacteria	UBA10353_marine_group	UBA10353_marine_group	uncultured	uncultured_bacterium
Taxa_947	Bacteria	Proteobacteria	Alphaproteobacteria	Rhodobacterales	Rhodobacteraceae	Oceanicaulis	uncultured_bacterium
Taxa_948	Bacteria	Proteobacteria	Gammaproteobacteria	Enterobacterales	Morganellaceae	Providencia	Candidatus_Providencia
Taxa_951	Bacteria	Proteobacteria	Gammaproteobacteria	Oceanospirillales	Pseudohongiellaceae	Pseudohongiella	uncultured_marine
Taxa_952	Bacteria	Proteobacteria	Gammaproteobacteria	Alteromonadales	Alteromonadaceae	Glaciecola	Glaciecola_punicea
Taxa_953	Bacteria	Proteobacteria	Gammaproteobacteria	OM182_clade	OM182_clade	OM182_clade	marine_gamma
Taxa_954	Bacteria	Proteobacteria	Gammaproteobacteria	Oceanospirillales	Oleiphilaceae	Oleiphilus	uncultured_bacterium
Taxa_955	Bacteria	Bdellovibrionota	Bdellovibrionia	Bdellovibrionales	Bdellovibrionaceae	OM27_clade	uncultured_bacterium
Taxa_956	Bacteria	Proteobacteria	Alphaproteobacteria	SAR11_clade	Clade_II	Clade_II	uncultured_bacterium
Taxa_957	Bacteria	Nitrospinota	Nitrospinia	Nitrospinales	Nitrospinaceae	LS-NOB	uncultured_delta
Taxa_958	Bacteria	Bacteroidota	Bacteroidia	Flavobacteriales	Flavobacteriaceae	Cellulophaga	Cellulophaga_sp.
Taxa_959	Bacteria	Proteobacteria	Gammaproteobacteria	Cellvibrionales	Porticoccaceae	Porticoccus	uncultured_bacterium
Taxa_960	Bacteria	Proteobacteria	Alphaproteobacteria	Rhodobacterales	Rhodobacteraceae	Lacimonas	uncultured_Alphaproteobacteria
Taxa_961	Bacteria	Proteobacteria	Alphaproteobacteria	Rhodospirillales	AEGEAN-169_marine_group	AEGEAN-169_marine_group	uncultured_bacterium
Taxa_962	Bacteria	Proteobacteria	Gammaproteobacteria	Aeromonadales	Aeromonadaceae	Aeromonas	Aeromonas_caviae
Taxa_963	Bacteria	Proteobacteria	Alphaproteobacteria	Puniceispirillales	SAR116_clade	SAR116_clade	uncultured_bacterium
Taxa_964	Bacteria	Proteobacteria	Gammaproteobacteria	Oceanospirillales	Cellvibrionaceae	Marinimicrobium	uncultured_bacterium
Taxa_965	Bacteria	Verrucomicrobiota	Verrucomicrobiae	Verrucomicrobiales	Rubritaleaceae	Roseibacillus	uncultured_bacterium
Taxa_966	Bacteria	Proteobacteria	Gammaproteobacteria	Burkholderiales	Oxalobacteraceae	Massilia	Massilia_sp.
Taxa_967	Bacteria	Proteobacteria	Alphaproteobacteria	SAR11_clade	Clade_II	Clade_II	uncultured_Pelagibacterales
Taxa_968	Bacteria	Actinobacteriota	Acidimicrobiia	Microtrichales	uncultured	uncultured	uncultured_bacterium
Taxa_969	Bacteria	Proteobacteria	Alphaproteobacteria	Defluviicoccales	uncultured	uncultured	uncultured_bacterium
Taxa_970	Bacteria	Actinobacteriota	Actinobacteria	Corynebacteriales	Mycobacteriaceae	Mycobacterium	uncultured_actinobacterium
Taxa_971	Bacteria	Bacteroidota	Rhodothermia	Balneolales	Balneolaceae	Balneola	uncultured_bacterium
Taxa_972	Bacteria	Verrucomicrobiota	Verrucomicrobiae	Opitutales	Puniceicoccaceae	MB11C04_marine_group	uncultured_bacterium
Taxa_973	Bacteria	Proteobacteria	Gammaproteobacteria	Alteromonadales	Alteromonadaceae	uncultured	Glaciecola_punicea
Taxa_974	Bacteria	Planctomycetota	Phycisphaerae	Phycisphaerales	Phycisphaeraceae	JL-ETNP-F27	uncultured_bacterium
Taxa_975	Bacteria	Cyanobacteria	Cyanobacteriia	Synechococcales	Cyanobiaceae	Synechococcus_CC9902	uncultured_cyanobacterium
Taxa_976	Bacteria	Verrucomicrobiota	Verrucomicrobiae	Verrucomicrobiales	Rubritaleaceae	Rubritalea	uncultured_bacterium
Taxa_977	Bacteria	Gemmatimonadota	BD2-11_terrestrial_group	BD2-11_terrestrial_group	BD2-11_terrestrial_group	BD2-11_terrestrial_group	uncultured_BD2-11
Taxa_978	Bacteria	Proteobacteria	Gammaproteobacteria	Coxiellales	Coxiellaceae	Coxiella	uncultured_bacterium
Taxa_979	Bacteria	Proteobacteria	Gammaproteobacteria	Cellvibrionales	Cellvibrionaceae	Simiduia	uncultured_bacterium
Taxa_980	Bacteria	Marinimicrobia_(SAR406_clade)	Marinimicrobia_(SAR406_clade)	Marinimicrobia_(SAR406_clade)	Marinimicrobia_(SAR406_clade)	Marinimicrobia_(SAR406_clade)	uncultured_Candidatus
Taxa_981	Bacteria	Proteobacteria	Gammaproteobacteria	Alteromonadales	Pseudoalteromonadaceae	Pseudoalteromonas	Pseudomonas_aeruginosa
Taxa_982	Bacteria	Bacteroidota	Bacteroidia	Flavobacteriales	Flavobacteriaceae	Tenacibaculum	Tenacibaculum_litoreum
Taxa_983	Bacteria	Verrucomicrobiota	Lentisphaeria	Victivallales	Arctic95B-14	Arctic95B-14	uncultured_bacterium
Taxa_984	Bacteria	Proteobacteria	Gammaproteobacteria	Oceanospirillales	Cellvibrionaceae	Marinimicrobium	Acinetobacter_sp.
Taxa_985	Bacteria	Verrucomicrobiota	Kiritimatiellae	WCHB1-41	WCHB1-41	WCHB1-41	uncultured_bacterium
Taxa_987	Bacteria	Proteobacteria	Alphaproteobacteria	Rhodobacterales	Rhodobacteraceae	Sediminimonas	uncultured_organism
Taxa_988	Bacteria	Bacteroidota	Bacteroidia	Flavobacteriales	Flavobacteriaceae	Polaribacter	Polaribacter_sp.
Taxa_989	Bacteria	Proteobacteria	Alphaproteobacteria	Rhodobacterales	Rhodobacteraceae	Gemmobacter	uncultured_bacterium
Taxa_995	Bacteria	Firmicutes	Clostridia	Oscillospirales	Ruminococcaceae	Faecalibacterium	uncultured_bacterium
Taxa_998	Bacteria	Proteobacteria	Alphaproteobacteria	Rhodobacterales	Rhodobacteraceae	uncultured	Roseobacter_sp.
Taxa_999	Bacteria	Proteobacteria	Alphaproteobacteria	Rickettsiales	Fokiniaceae	MD3-55	uncultured_bacterium
Taxa_1002	Bacteria	Proteobacteria	Gammaproteobacteria	Alteromonadales	Pseudoalteromonadaceae	Pseudoalteromonas	Pseudoalteromonas_lipolytica
Taxa_1004	Bacteria	Actinobacteriota	Actinobacteria	Streptomycetales	Streptomycetaceae	Streptomyces	Streptomyces_sp.
Taxa_1006	Bacteria	Proteobacteria	Gammaproteobacteria	Enterobacterales	Enterobacteriaceae	uncultured	uncultured_bacterium
Taxa_1007	Bacteria	Proteobacteria	Gammaproteobacteria	Alteromonadales	Shewanellaceae	Shewanella	Shewanella_algae
Taxa_1009	Bacteria	Actinobacteriota	Actinobacteria	Corynebacteriales	uncultured	uncultured	uncultured_organism
Taxa_1010	Bacteria	Proteobacteria	Gammaproteobacteria	Enterobacterales	Yersiniaceae	Serratia	Serratia_sp.
Taxa_1011	Bacteria	Proteobacteria	Gammaproteobacteria	Oceanospirillales	Saccharospirillaceae	Pseudohongiella	uncultured_bacterium
Taxa_1016	Bacteria	Proteobacteria	Gammaproteobacteria	Alteromonadales	Alteromonadaceae	uncultured	uncultured_bacterium
Taxa_1018	Bacteria	Proteobacteria	Gammaproteobacteria	Arenicellales	Arenicellaceae	Arenicella	uncultured_bacterium
Taxa_1019	Bacteria	Proteobacteria	Gammaproteobacteria	Alteromonadales	Colwelliaceae	Colwellia	uncultured_marine
Taxa_1020	Bacteria	Proteobacteria	Gammaproteobacteria	Oceanospirillales	Endozoicomonadaceae	Endozoicomonas	Endozoicomonas_montiporae
Taxa_1022	Bacteria	Bacteroidota	Bacteroidia	Flavobacteriales	Crocinitomicaceae	Crocinitomix	uncultured_bacterium
Taxa_1026	Bacteria	Actinobacteriota	Actinobacteria	Corynebacteriales	Dietziaceae	Dietzia	Dietzia_sp.
Taxa_1027	Bacteria	Proteobacteria	Gammaproteobacteria	Burkholderiales	Methylophilaceae	OM43_clade	uncultured_bacterium
Taxa_1028	Bacteria	Proteobacteria	Alphaproteobacteria	Sphingomonadales	Sphingomonadaceae	Porphyrobacter	uncultured_bacterium
Taxa_1030	Bacteria	Planctomycetota	OM190	OM190	OM190	OM190	uncultured_planctomycete
Taxa_1031	Bacteria	Proteobacteria	Gammaproteobacteria	Oceanospirillales	Nitrincolaceae	uncultured	uncultured_marine
Taxa_1032	Bacteria	Bacteroidota	Bacteroidia	Chitinophagales	Chitinophagaceae	uncultured	uncultured_bacterium
Taxa_1033	Bacteria	Proteobacteria	Gammaproteobacteria	Oceanospirillales	Saccharospirillaceae	Oceanobacter	uncultured_bacterium
Taxa_1034	Bacteria	Hydrogenedentes	Hydrogenedentia	Hydrogenedentiales	Hydrogenedensaceae	Hydrogenedensaceae	uncultured_bacterium
Taxa_1037	Bacteria	Proteobacteria	Gammaproteobacteria	Cellvibrionales	Halieaceae	Pseudohaliea	uncultured_organism
Taxa_1041	Bacteria	Planctomycetota	Phycisphaerae	Phycisphaerales	Phycisphaeraceae	SM1A02	uncultured_bacterium
Taxa_1042	Bacteria	Bacteroidota	Bacteroidia	Flavobacteriales	Flavobacteriaceae	uncultured	uncultured_bacterium
Taxa_1043	Bacteria	Proteobacteria	Alphaproteobacteria	Rhodobacterales	Rhodobacteraceae	Sedimentitalea	uncultured_Alphaproteobacteria
Taxa_1044	Bacteria	Proteobacteria	Gammaproteobacteria	Burkholderiales	Comamonadaceae	Hydrogenophaga	uncultured_organism
Taxa_1046	Bacteria	Proteobacteria	Gammaproteobacteria	Alteromonadales	Psychromonadaceae	uncultured	uncultured_bacterium
Taxa_1051	Bacteria	Proteobacteria	Alphaproteobacteria	Parvibaculales	Parvibaculaceae	Mf105b01	uncultured_bacterium
Taxa_1054	Bacteria	Proteobacteria	Alphaproteobacteria	Rhodospirillales	Terasakiellaceae	uncultured	alpha_proteobacterium
Taxa_1055	Bacteria	Proteobacteria	Gammaproteobacteria	Enterobacterales	Yersiniaceae	Serratia	Rahnella_sp.
Taxa_1057	Bacteria	Proteobacteria	Gammaproteobacteria	Gammaproteobacteria_Incertae_Sedis	Unknown_Family	uncultured	uncultured_bacterium
Taxa_1058	Bacteria	Bacteroidota	Bacteroidia	Flavobacteriales	Flavobacteriaceae	Dokdonia	uncultured_Bacteroidetes
Taxa_1059	Bacteria	Proteobacteria	Alphaproteobacteria	Rhodobacterales	Rhodobacteraceae	Roseovarius	uncultured_bacterium
Taxa_1060	Bacteria	Proteobacteria	Gammaproteobacteria	Vibrionales	Vibrionaceae	Vibrio	Kryptophanaron_alfredi
Taxa_1061	Bacteria	Proteobacteria	Alphaproteobacteria	Sphingomonadales	Sphingomonadaceae	Sphingomonas	Sphingomonas_sp.
Taxa_1062	Bacteria	Proteobacteria	Gammaproteobacteria	Enterobacterales	Erwiniaceae	Rosenbergiella	Rosenbergiella_nectarea
Taxa_1063	Bacteria	Proteobacteria	Alphaproteobacteria	Sphingomonadales	Sphingomonadaceae	uncultured	uncultured_bacterium
Taxa_1064	Bacteria	Proteobacteria	Gammaproteobacteria	Enterobacterales	Enterobacteriaceae	Enterobacter	Pluralibacter_gergoviae
Taxa_1065	Bacteria	Proteobacteria	Alphaproteobacteria	Vibrionales	Vibrionaceae	Sulfitobacter	uncultured_bacterium
Taxa_1066	Bacteria	Proteobacteria	Alphaproteobacteria	Rhizobiales	Xanthobacteraceae	uncultured	uncultured_bacterium
Taxa_1067	Bacteria	Proteobacteria	Alphaproteobacteria	Rhodospirillales	Thalassospiraceae	Thalassospira	uncultured_Alphaproteobacteria
Taxa_1069	Bacteria	Proteobacteria	Gammaproteobacteria	Alteromonadales	Marinobacteraceae	Marinobacter	Marinobacter_salsuginis
Taxa_1072	Bacteria	Actinobacteriota	Actinobacteria	Micrococcales	Micrococcaceae	Micrococcus	Micrococcus_sp.
Taxa_1073	Bacteria	Firmicutes	Bacilli	Bacillales	Bacillaceae	Bacillus	Bacillus_anthracis
Taxa_1076	Bacteria	Proteobacteria	Alphaproteobacteria	Rickettsiales	uncultured	uncultured	uncultured_bacterium
Taxa_1077	Bacteria	Proteobacteria	Gammaproteobacteria	Enterobacterales	Morganellaceae	Buchnera	uncultured_bacterium
Taxa_1078	Bacteria	Proteobacteria	Gammaproteobacteria	Oceanospirillales	Halomonadaceae	Salinicola	Salinicola_sp.
Taxa_1079	Bacteria	Proteobacteria	Gammaproteobacteria	Aeromonadales	Succinivibrionaceae	Succinivibrio	uncultured_bacterium
Taxa_1084	Bacteria	Proteobacteria	Alphaproteobacteria	Rhodobacterales	Rhodobacteraceae	Actibacterium	Actibacterium_atlanticum
Taxa_1085	Bacteria	Proteobacteria	Alphaproteobacteria	Rhodobacterales	Rhodobacteraceae	Salinihabitans	Salinihabitans_flavidus
Taxa_1088	Bacteria	Proteobacteria	Gammaproteobacteria	Burkholderiales	Comamonadaceae	Rhodoferax	uncultured_bacterium
Taxa_1090	Bacteria	Proteobacteria	Gammaproteobacteria	Alteromonadales	Marinobacteraceae	Marinobacter	Marinobacter_hydrocarbonoclasticus
Taxa_1091	Bacteria	Proteobacteria	Gammaproteobacteria	Chromatiales	Chromatiaceae	Candidatus_Thiobios	uncultured_bacterium
Taxa_1092	Bacteria	Proteobacteria	Gammaproteobacteria	Enterobacterales	Morganellaceae	Arsenophonus	bacterium_endosymbiont
Taxa_1095	Bacteria	Proteobacteria	Gammaproteobacteria	Oceanospirillales	Alteromonadaceae	Rheinheimera	uncultured_bacterium
Taxa_1099	Bacteria	Proteobacteria	Gammaproteobacteria	Enterobacterales	Enterobacteriaceae	Aeromonas	uncultured_Aeromonas
Taxa_1100	Bacteria	Bacteroidota	Bacteroidia	Flavobacteriales	Flavobacteriaceae	Salegentibacter	uncultured_bacterium
Taxa_1101	Bacteria	Proteobacteria	Gammaproteobacteria	Alteromonadales	Alteromonadaceae	Aurantimonas	uncultured_bacterium
Taxa_1102	Bacteria	Proteobacteria	Alphaproteobacteria	Rhodobacterales	Rhodobacteraceae	Celeribacter	Ruegeria_sp.
Taxa_1103	Bacteria	Proteobacteria	Alphaproteobacteria	Rhizobiales	Methyloligellaceae	uncultured	uncultured_bacterium
Taxa_1104	Bacteria	Proteobacteria	Gammaproteobacteria	Oceanospirillales	Alcanivoracaceae1	Alcanivorax	Uncultured_Pseudospirillum
Taxa_1105	Bacteria	Firmicutes	Bacilli	Lactobacillales	Enterococcaceae	Enterococcus	Enterococcus_cecorum
Taxa_1109	Bacteria	Proteobacteria	Alphaproteobacteria	Vibrionales	Vibrionaceae	Vibrio	uncultured_Alphaproteobacteria
Taxa_1112	Bacteria	Proteobacteria	Alphaproteobacteria	Rickettsiales	S25-593	S25-593	uncultured_bacterium
Taxa_1116	Bacteria	Proteobacteria	Gammaproteobacteria	Oceanospirillales	Saccharospirillaceae	Thalassolituus	uncultured_bacterium
Taxa_1124	Bacteria	Proteobacteria	Gammaproteobacteria	Enterobacterales	Enterobacteriaceae	Escherichia-Shigella	Shigella_dysenteriae
Taxa_1125	Bacteria	Proteobacteria	Gammaproteobacteria	Oceanospirillales	Halomonadaceae	Halomonas	Halomonas_glaciei
Taxa_1126	Bacteria	Proteobacteria	Gammaproteobacteria	Methylococcales	Cycloclasticaceae	Cycloclasticus	uncultured_gamma
Taxa_1127	Bacteria	Proteobacteria	Alphaproteobacteria	Rhodobacterales	Rhodobacteraceae	Ruegeria	Ruegeria_pomeroyi
Taxa_1128	Bacteria	Proteobacteria	Gammaproteobacteria	Cellvibrionales	Spongiibacteraceae	BD1-7_clade	uncultured_marine
Taxa_1129	Bacteria	Proteobacteria	Alphaproteobacteria	Rhodobacterales	Rhodobacteraceae	Nautella	uncultured_bacterium
Taxa_1130	Bacteria	Proteobacteria	Gammaproteobacteria	Oceanospirillales	Saccharospirillaceae	Reinekea	uncultured_marine
Taxa_1131	Bacteria	Proteobacteria	Alphaproteobacteria	Rhodobacterales	Rhodobacteraceae	Ruegeria	Ruegeria_sp.
Taxa_1132	Bacteria	Proteobacteria	Gammaproteobacteria	B2M28	B2M28	B2M28	uncultured_bacterium
Taxa_1133	Bacteria	Proteobacteria	Alphaproteobacteria	Rhizobiales	Devosiaceae	Devosia	uncultured_bacterium
Taxa_1134	Bacteria	Bacteroidota	Rhodothermia	Balneolales	Balneolaceae	Gracilimonas	uncultured_bacterium
Taxa_1135	Bacteria	Fusobacteriota	Fusobacteriia	Fusobacteriales	Fusobacteriaceae	Fusobacterium	uncultured_bacterium
Taxa_1137	Bacteria	Firmicutes	Bacilli	Staphylococcales	Staphylococcaceae	Staphylococcus	Staphylococcus_aureus
Taxa_1138	Bacteria	Proteobacteria	Gammaproteobacteria	Ectothiorhodospirales	Thioalkalispiraceae	uncultured	uncultured_bacterium
Taxa_1143	Bacteria	Proteobacteria	Gammaproteobacteria	Alteromonadales	Alteromonadaceae	Agarivorans	uncultured_bacterium
Taxa_1144	Bacteria	Proteobacteria	Gammaproteobacteria	Rhodobacterales	Rhodobacteraceae	Alcanivorax	uncultured_bacterium
Taxa_1146	Bacteria	Proteobacteria	Alphaproteobacteria	Thalassobaculales	uncultured	uncultured	uncultured_bacterium
Taxa_1147	Bacteria	Proteobacteria	Gammaproteobacteria	Oceanospirillales	Oceanospirillaceae	Oceanospirillum	bacterium_WHC1-3
Taxa_1150	Bacteria	Proteobacteria	Alphaproteobacteria	Rhodobacterales	Rhodobacteraceae	Yoonia-Loktanella	uncultured_Alphaproteobacteria
Taxa_1152	Bacteria	Bacteroidota	Bacteroidia	Flavobacteriales	Flavobacteriaceae	Tenacibaculum	uncultured_bacterium
Taxa_1153	Bacteria	Actinobacteriota	Actinobacteria	Corynebacteriales	Nocardiaceae	Gordonia	Gordonia_sp.
Taxa_1154	Bacteria	Proteobacteria	Gammaproteobacteria	Burkholderiales	Burkholderiaceae	Burkholderia-Caballeronia-Paraburkholderia	uncultured_Burkholderia
Taxa_1155	Bacteria	Proteobacteria	Gammaproteobacteria	Enterobacterales	Enterobacteriaceae	Vibrio	Klebsiella_pneumoniae
Taxa_1156	Bacteria	Proteobacteria	Gammaproteobacteria	Oceanospirillales	Halomonadaceae	Halomonas	Halomonas_elongata
Taxa_1157	Bacteria	Proteobacteria	Alphaproteobacteria	Rhodobacterales	Rhodobacteraceae	Planktomarina	uncultured_marine
Taxa_1159	Bacteria	Proteobacteria	Gammaproteobacteria	Alteromonadales	Alteromonadaceae	Alteromonas	uncultured_Alteromonadaceae
Taxa_1160	Bacteria	Firmicutes	Bacilli	Staphylococcales	Gemellaceae	Gemella	uncultured_bacterium
Taxa_1164	Bacteria	Bacteroidota	Bacteroidia	Flavobacteriales	Crocinitomicaceae	Crocinitomix	uncultured_Crocinitomix
Taxa_1168	Bacteria	Proteobacteria	Gammaproteobacteria	Aeromonadales	Aeromonadaceae	Oceanisphaera	uncultured_bacterium
Taxa_1170	Bacteria	Proteobacteria	Gammaproteobacteria	Oceanospirillales	Alcanivoracaceae	Ketobacter	uncultured_bacterium
Taxa_1172	Bacteria	Proteobacteria	Gammaproteobacteria	Enterobacterales	Enterobacteriaceae	Escherichia-Shigella	uncultured_Enterobacteriaceae
Taxa_1173	Bacteria	Proteobacteria	Gammaproteobacteria	Burkholderiales	Neisseriaceae	Neisseria	uncultured_bacterium
Taxa_1174	Bacteria	Proteobacteria	Gammaproteobacteria	Pasteurellales	Pasteurellaceae	Haemophilus	uncultured_bacterium
Taxa_1175	Bacteria	Planctomycetota	Planctomycetes	Pirellulales	Pirellulaceae	Blastopirellula	uncultured_bacterium
Taxa_1176	Bacteria	Proteobacteria	Gammaproteobacteria	Pseudomonadales	Moraxellaceae	Acinetobacter	uncultured_Acinetobacter
Taxa_1177	Bacteria	Proteobacteria	Gammaproteobacteria	Thiotrichales	Thiotrichaceae	uncultured	uncultured_bacterium
Taxa_1178	Bacteria	Proteobacteria	Gammaproteobacteria	Burkholderiales	SC-I-84	SC-I-84	uncultured_bacterium
Taxa_1179	Bacteria	Proteobacteria	Alphaproteobacteria	Rhodobacterales	Rhodobacteraceae	Actibacterium	uncultured_bacterium
Taxa_1180	Bacteria	Proteobacteria	Alphaproteobacteria	Caulobacterales	Caulobacteraceae	Brevundimonas	uncultured_bacterium
Taxa_1181	Bacteria	Myxococcota	Polyangia	Blfdi19	Blfdi19	Blfdi19	uncultured_bacterium
Taxa_1182	Bacteria	Proteobacteria	Alphaproteobacteria	Rhodobacterales	Rhodobacteraceae	Roseobacter_clade_NAC11-7_lineage	uncultured_bacterium
Taxa_1183	Bacteria	Proteobacteria	Alphaproteobacteria	Rhodobacterales	Rhodobacteraceae	Ruegeria	Ruegeria_arenilitoris
Taxa_1184	Bacteria	Firmicutes	Bacilli	Lactobacillales	Streptococcaceae	Streptococcus	Streptococcus_salivarius
Taxa_1185	Bacteria	Actinobacteriota	Actinobacteria	FFCH16263	FFCH16263	FFCH16263	uncultured_bacterium
Taxa_1186	Bacteria	Firmicutes	Bacilli	Lactobacillales	Carnobacteriaceae	Granulicatella	uncultured_bacterium
Taxa_1187	Bacteria	Proteobacteria	Alphaproteobacteria	Rhodobacterales	Rhodobacteraceae	Roseovarius	uncultured_Alphaproteobacteria
Taxa_1189	Bacteria	Proteobacteria	Gammaproteobacteria	Pasteurellales	Pasteurellaceae	Mannheimia	Mannheimia_varigena
Taxa_1190	Bacteria	Proteobacteria	Gammaproteobacteria	Burkholderiales	Hydrogenophilaceae	uncultured	uncultured_bacterium
Taxa_1192	Bacteria	Proteobacteria	Alphaproteobacteria	Rhodobacterales	Rhodobacteraceae	Lacimonas	bacterium
Taxa_1193	Bacteria	Proteobacteria	Gammaproteobacteria	Enterobacterales	Enterobacteriaceae	Enterobacter	endosymbiont_of
Taxa_1194	Bacteria	Proteobacteria	Gammaproteobacteria	Oceanospirillales	Pseudoalteromonadaceae	Pseudoalteromonas	uncultured_bacterium
Taxa_1197	Bacteria	Proteobacteria	Gammaproteobacteria	Alteromonadales	Alteromonadaceae	uncultured	Alteromonadaceae_bacterium
Taxa_1199	Bacteria	Proteobacteria	Alphaproteobacteria	Sphingomonadales	Sphingomonadaceae	Sphingobium	Sphingomonas_sp.
Taxa_1201	Bacteria	Proteobacteria	Gammaproteobacteria	Oceanospirillales	Porticoccaceae	C1-B045	uncultured_bacterium
Taxa_1203	Bacteria	Proteobacteria	Alphaproteobacteria	Rhodobacterales	Rhodobacteraceae	Amylibacter	uncultured_Alphaproteobacteria
Taxa_1204	Bacteria	Firmicutes	Bacilli	Lactobacillales	Streptococcaceae	Streptococcus	uncultured_organism
Taxa_1206	Bacteria	Proteobacteria	Alphaproteobacteria	Rhizobiales	Rhizobiaceae	Ochrobactrum	Ochrobactrum_sp.
Taxa_1209	Bacteria	Proteobacteria	Gammaproteobacteria	Oceanospirillales	Marinomonadaceae	Marinomonas	Marinomonas_sp.
Taxa_1210	Bacteria	Bacteroidota	Bacteroidia	Flavobacteriales	Flavobacteriaceae	Mesonia	Mesonia_maritima
Taxa_1214	Bacteria	Desulfobacterota	Desulfovibrionia	Desulfovibrionales	Desulfomicrobiaceae	Desulfomicrobium	uncultured_delta
Taxa_1215	Bacteria	Bdellovibrionota	Bdellovibrionia	Bdellovibrionales	Bdellovibrionaceae	OM27_clade	uncultured_marine
Taxa_1216	Bacteria	Proteobacteria	Gammaproteobacteria	Oceanospirillales	Microbulbiferaceae	Microbulbifer	uncultured_bacterium
Taxa_1217	Bacteria	Proteobacteria	Alphaproteobacteria	Rhodospirillales	Rhodospirillaceae	Thalassospira	uncultured_Marinomonas
Taxa_1218	Bacteria	Proteobacteria	Gammaproteobacteria	Aeromonadales	Aeromonadaceae	Aeromonas	uncultured_bacterium
Taxa_1219	Bacteria	Proteobacteria	Alphaproteobacteria	Rhodobacterales	Rhodobacteraceae	Xanthobacter	uncultured_bacterium
Taxa_1220	Bacteria	Proteobacteria	Gammaproteobacteria	Alteromonadales	Nitrincolaceae	Marinobacterium	Alteromonas_sp.
Taxa_1221	Bacteria	Bacteroidota	Bacteroidia	Flavobacteriales	Flavobacteriaceae	Maritimimonas	uncultured_bacterium
Taxa_1222	Bacteria	Proteobacteria	Alphaproteobacteria	Rhodobacterales	Rhodobacteraceae	Sulfitobacter	Oceanicola_sp.
Taxa_1224	Bacteria	Proteobacteria	Gammaproteobacteria	Vibrionales	Vibrionaceae	Vibrio	Vibrio_atlanticus
Taxa_1225	Bacteria	Proteobacteria	Gammaproteobacteria	Cellvibrionales	Cellvibrionaceae	Cellvibrio	uncultured_bacterium
Taxa_1227	Bacteria	Proteobacteria	Gammaproteobacteria	Vibrionales	Vibrionaceae	Aliivibrio	Aliivibrio_fischeri
Taxa_1228	Bacteria	Proteobacteria	Alphaproteobacteria	Rhodobacterales	Rhodobacteraceae	Roseovarius	Roseovarius_confluentis
Taxa_1229	Bacteria	Bdellovibrionota	Oligoflexia	Oligoflexales	uncultured	uncultured	uncultured_bacterium
Taxa_1233	Bacteria	Proteobacteria	Gammaproteobacteria	Enterobacterales	Enterobacteriaceae	Enterobacter	uncultured_Enterobacter
Taxa_1234	Bacteria	Actinobacteriota	Actinobacteria	Propionibacteriales	Nocardioidaceae	Aeromicrobium	uncultured_bacterium
Taxa_1235	Bacteria	Actinobacteriota	Actinobacteria	Micrococcales	Micrococcaceae	Arthrobacter	Arthrobacter_sp.
Taxa_1236	Bacteria	Actinobacteriota	Actinobacteria	Micrococcales	Microbacteriaceae	Leucobacter	uncultured_bacterium
Taxa_1240	Bacteria	Proteobacteria	Gammaproteobacteria	Burkholderiales	Nitrosomonadaceae	Nitrosomonas	uncultured_bacterium
Taxa_1241	Bacteria	Proteobacteria	Gammaproteobacteria	Alteromonadales	Psychromonadaceae	Agarivorans	Agarivorans_gilvus
Taxa_1242	Bacteria	Proteobacteria	Alphaproteobacteria	Sphingomonadales	Sphingomonadaceae	Altererythrobacter	uncultured_Sphingomonadales
Taxa_1244	Bacteria	Proteobacteria	Gammaproteobacteria	Cellvibrionales	Porticoccaceae	Pseudohongiella	uncultured_bacterium
Taxa_1252	Bacteria	Proteobacteria	Alphaproteobacteria	Parvibaculales	Parvibaculaceae	PS1_clade	uncultured_bacterium
Taxa_1254	Bacteria	Proteobacteria	Gammaproteobacteria	Oceanospirillales	Alcanivoracaceae1	Alcanivorax	Microbulbifer_sp.
Taxa_1258	Bacteria	Proteobacteria	Alphaproteobacteria	Rhodobacterales	uncultured	uncultured	uncultured_bacterium
Taxa_1260	Bacteria	Proteobacteria	Gammaproteobacteria	Diplorickettsiales	Diplorickettsiaceae	uncultured	uncultured_bacterium
Taxa_1261	Bacteria	Proteobacteria	Alphaproteobacteria	Rhodospirillales	Terasakiellaceae	Aestuariispira	uncultured_Alphaproteobacteria
Taxa_1268	Bacteria	Proteobacteria	Gammaproteobacteria	Thiomicrospirales	Thioglobaceae	SUP05_cluster	uncultured_bacterium
Taxa_1269	Bacteria	Proteobacteria	Gammaproteobacteria	Alteromonadales	Pseudoalteromonadaceae	Pseudoalteromonas	Pseudoalteromonas_agarivorans
Taxa_1270	Bacteria	Proteobacteria	Gammaproteobacteria	Steroidobacterales	Woeseiaceae	Woeseia	uncultured_bacterium
Taxa_1271	Bacteria	Proteobacteria	Gammaproteobacteria	SAR86_clade	SAR86_clade	SAR86_clade	uncultured_marine
Taxa_1272	Bacteria	Proteobacteria	Gammaproteobacteria	Legionellales	Legionellaceae	uncultured	uncultured_bacterium
Taxa_1273	Bacteria	Planctomycetota	OM190	OM190	OM190	OM190	uncultured_Planctomycetaceae
Taxa_1274	Bacteria	Proteobacteria	Gammaproteobacteria	Burkholderiales	Methylophilaceae	OM43_clade	uncultured_marine
Taxa_1275	Bacteria	Proteobacteria	Alphaproteobacteria	Rhodobacterales	Rhodobacteraceae	Octadecabacter	uncultured_marine
Taxa_1276	Bacteria	Bdellovibrionota	Bdellovibrionia	Bdellovibrionales	Bdellovibrionaceae	OM27_clade	uncultured_delta
Taxa_1279	Bacteria	Actinobacteriota	Actinobacteria	Micrococcales	Microbacteriaceae	Microbacterium	Microbacterium_sp.
Taxa_1281	Bacteria	Proteobacteria	Gammaproteobacteria	Tenderiales	Tenderiaceae	Candidatus_Tenderia	uncultured_bacterium
Taxa_1282	Bacteria	Myxococcota	Polyangia	Haliangiales	Haliangiaceae	Haliangium	uncultured_bacterium
Taxa_1284	Bacteria	Firmicutes	Desulfotomaculia	Ammonifexales	Ammonificaceae	uncultured	uncultured_bacterium
Taxa_1285	Bacteria	Proteobacteria	Gammaproteobacteria	Pasteurellales	Pasteurellaceae	Actinobacillus	uncultured_bacterium
Taxa_1287	Bacteria	Desulfobacterota	Desulfuromonadia	PB19	PB19	PB19	uncultured_bacterium
Taxa_1288	Bacteria	Proteobacteria	Gammaproteobacteria	Nitrosococcales	Nitrosococcaceae	uncultured	uncultured_bacterium
Taxa_1289	Bacteria	Proteobacteria	Gammaproteobacteria	Arenicellales	Arenicellaceae	uncultured	uncultured_bacterium
Taxa_1291	Bacteria	Proteobacteria	Gammaproteobacteria	Vibrionales	Vibrionaceae	Vibrio	Vibrio_chagasii
Taxa_1294	Bacteria	Bacteroidota	Bacteroidia	Flavobacteriales	Flavobacteriaceae	Pibocella	uncultured_bacterium
Taxa_1295	Bacteria	Proteobacteria	Gammaproteobacteria	Enterobacterales	Enterobacteriaceae	Shewanella	uncultured_bacterium
Taxa_1298	Bacteria	Proteobacteria	Alphaproteobacteria	Parvibaculales	OCS116_clade	OCS116_clade	uncultured_bacterium
Taxa_1299	Bacteria	Actinobacteriota	Actinobacteria	Frankiales	Sporichthyaceae	hgcI_clade	uncultured_bacterium
Taxa_1300	Bacteria	Proteobacteria	Gammaproteobacteria	Alteromonadales	Psychromonadaceae	Psychromonas	uncultured_proteobacterium
Taxa_1301	Bacteria	Proteobacteria	Gammaproteobacteria	Alteromonadales	Alteromonadaceae	Alteromonas	Alteromonas_macleodii
Taxa_1302	Bacteria	Proteobacteria	Alphaproteobacteria	Rhodospirillales	Rhodospirillaceae	Caenispirillum	Caenispirillum_sp.
Taxa_1304	Bacteria	Proteobacteria	Gammaproteobacteria	Burkholderiales	Comamonadaceae	Comamonas	uncultured_bacterium
Taxa_1306	Bacteria	Bacteroidota	Bacteroidia	Chitinophagales	Chitinophagaceae	Flavisolibacter	uncultured_bacterium
Taxa_1308	Bacteria	Proteobacteria	Gammaproteobacteria	Gammaproteobacteria_Incertae_Sedis	Unknown_Family	Alkalimarinus	uncultured_bacterium
Taxa_1310	Bacteria	Proteobacteria	Gammaproteobacteria	Oceanospirillales	Alcanivoracaceae1	Alcanivorax	Alcanivorax_sp.
Taxa_1312	Bacteria	Proteobacteria	Gammaproteobacteria	Oceanospirillales	Pseudohongiellaceae	Pseudohongiella	Uncultured_Pseudospirillum
Taxa_1313	Bacteria	Bacteroidota	Bacteroidia	Flavobacteriales	Flavobacteriaceae	Gelidibacter	uncultured_bacterium
Taxa_1314	Bacteria	Proteobacteria	Gammaproteobacteria	Alteromonadales	Alteromonadaceae	Photobacterium	Alteromonas_sp.
Taxa_1315	Bacteria	Actinobacteriota	Actinobacteria	PeM15	PeM15	PeM15	uncultured_bacterium
Taxa_1316	Bacteria	Bacteroidota	Bacteroidia	Flavobacteriales	Flavobacteriaceae	Winogradskyella	Croceibacter_atlanticus
Taxa_1317	Bacteria	Proteobacteria	Gammaproteobacteria	Alteromonadales	Alteromonadaceae	Colwellia	uncultured_bacterium
Taxa_1324	Bacteria	Dadabacteria	Dadabacteriia	Dadabacteriales	Dadabacteriales	Dadabacteriales	uncultured_marine
Taxa_1328	Bacteria	Proteobacteria	Gammaproteobacteria	Enterobacterales	Yersiniaceae	Endozoicomonas	uncultured_bacterium
Taxa_1329	Bacteria	Proteobacteria	Gammaproteobacteria	Acidithiobacillales	Acidithiobacillaceae	KCM-B-112	uncultured_Chromatiales
Taxa_1330	Bacteria	Proteobacteria	Alphaproteobacteria	Sphingomonadales	Sphingomonadaceae	Orientia	Orientia_tsutsugamushi
Taxa_1331	Bacteria	Nitrospinota	Nitrospinia	Nitrospinales	Nitrospinaceae	Nitrospina	uncultured_bacterium
Taxa_1332	Bacteria	Proteobacteria	Gammaproteobacteria	Pseudomonadales	Moraxellaceae	Acinetobacter	Acinetobacter_sp.
Taxa_1333	Bacteria	Firmicutes	Bacilli	Lactobacillales	Streptococcaceae	Streptococcus	uncultured_bacterium
Taxa_1334	Bacteria	Actinobacteriota	Actinobacteria	Corynebacteriales	Corynebacteriaceae	Corynebacteriaceae	uncultured_bacterium
Taxa_1335	Bacteria	Actinobacteriota	Actinobacteria	Micrococcales	Micrococcaceae	Rothia	Intrasporangiaceae_bacterium
Taxa_1336	Bacteria	Actinobacteriota	Actinobacteria	Micrococcales	Micrococcaceae	Rothia	Rothia_sp.
Taxa_1337	Bacteria	Proteobacteria	Gammaproteobacteria	Cellvibrionales	Microbulbiferaceae	Microbulbifer	uncultured_bacterium
Taxa_1338	Bacteria	Proteobacteria	Alphaproteobacteria	Rhizobiales	Xanthobacteraceae	Bradyrhizobium	Bradyrhizobium_sp.
Taxa_1339	Bacteria	Firmicutes	Bacilli	Staphylococcales	Staphylococcaceae	Auricoccus-Abyssicoccus	Auricoccus_indicus
Taxa_1340	Bacteria	Firmicutes	Bacilli	Lactobacillales	Streptococcaceae	Lactococcus	uncultured_bacterium
Taxa_1341	Bacteria	Firmicutes	Bacilli	Staphylococcales	Staphylococcaceae	Staphylococcus	Staphylococcus_sp.
Taxa_1342	Bacteria	Actinobacteriota	Actinobacteria	Micrococcales	Micrococcaceae	Nesterenkonia	metagenome
Taxa_1343	Bacteria	Campilobacterota	Campylobacteria	Campylobacterales	Helicobacteraceae	Helicobacter	Helicobacter_bilis
Taxa_1344	Bacteria	Proteobacteria	Alphaproteobacteria	Rhodobacterales	Rhodobacteraceae	Nautella	Marivita_sp.
Taxa_1345	Bacteria	Spirochaetota	Spirochaetia	Spirochaetales	Spirochaetaceae	Treponema	Treponema_denticola
Taxa_1346	Bacteria	Proteobacteria	Alphaproteobacteria	Sphingomonadales	Sphingomonadaceae	Erythrobacter	Orientia_tsutsugamushi
Taxa_1347	Bacteria	Proteobacteria	Gammaproteobacteria	Pseudomonadales	Pseudomonadaceae	Pseudomonas	bacterium_JNXLZ
Taxa_1348	Bacteria	Actinobacteriota	Actinobacteria	Micrococcales	Micrococcaceae	Kocuria	Kocuria_rhizophila
Taxa_1349	Bacteria	Firmicutes	Bacilli	Bacillales	Bacillaceae	Bacillus	Bacillus_sp.
Taxa_1350	Bacteria	Proteobacteria	Gammaproteobacteria	Burkholderiales	Burkholderiaceae	Ralstonia	uncultured_bacterium
Taxa_1351	Bacteria	Proteobacteria	Gammaproteobacteria	Pseudomonadales	Pseudomonadaceae	Pseudomonas	bacterium_ASP43
Taxa_1352	Bacteria	Proteobacteria	Alphaproteobacteria	Rhodobacterales	Rhodobacteraceae	Youngimonas	uncultured_bacterium
Taxa_1353	Bacteria	Proteobacteria	Gammaproteobacteria	Burkholderiales	Rhodocyclaceae	Thauera	uncultured_bacterium
Taxa_1354	Bacteria	Proteobacteria	Alphaproteobacteria	Rhodobacterales	Rhodobacteraceae	Marivita	Marivita_sp.
Taxa_1355	Bacteria	Actinobacteriota	Actinobacteria	Micrococcales	Intrasporangiaceae	Humibacillus	Intrasporangiaceae_bacterium
Taxa_1360	Bacteria	Campilobacterota	Campylobacteria	Campylobacterales	Helicobacteraceae	Helicobacter	Helicobacter_sp.
Taxa_1365	Bacteria	Bacteroidota	Bacteroidia	Bacteroidales	Rikenellaceae	Rikenellaceae_RC9_gut_group	uncultured_bacterium
Taxa_1366	Bacteria	Firmicutes	Clostridia	Oscillospirales	Ruminococcaceae	uncultured	uncultured_bacterium
Taxa_1368	Bacteria	Bdellovibrionota	Bdellovibrionia	Bacteriovoracales	Bacteriovoracaceae	Halobacteriovorax	Bacteriovorax_sp.
Taxa_1371	Bacteria	Proteobacteria	Alphaproteobacteria	Rhodobacterales	Rhodobacteraceae	Donghicola	uncultured_Donghicola
Taxa_1372	Bacteria	Proteobacteria	Alphaproteobacteria	Rhodobacterales	Rhodobacteraceae	Ascidiaceihabitans	uncultured_marine
Taxa_1377	Bacteria	Actinobacteriota	Actinobacteria	Micrococcales	Micrococcaceae	Nesterenkonia	Nesterenkonia_sp.
Taxa_1379	Bacteria	Proteobacteria	Gammaproteobacteria	Enterobacterales	Morganellaceae	Wigglesworthia	Wigglesworthia_glossinidia
Taxa_1380	Bacteria	Bacteroidota	Bacteroidia	Flavobacteriales	Flavobacteriaceae	Zunongwangia	uncultured_bacterium
Taxa_1381	Bacteria	Bacteroidota	Bacteroidia	Flavobacteriales	Crocinitomicaceae	Salinirepens	uncultured_bacterium
Taxa_1382	Bacteria	Proteobacteria	Gammaproteobacteria	UBA10353_marine_group	UBA10353_marine_group	UBA10353_marine_group	uncultured_bacterium
Taxa_1383	Bacteria	Proteobacteria	Alphaproteobacteria	Rhizobiales	Rhizobiales_Incertae_Sedis	uncultured	uncultured_bacterium
Taxa_1384	Bacteria	Planctomycetota	OM190	OM190	OM190	OM190	uncultured_bacterium
Taxa_1385	Bacteria	Proteobacteria	Alphaproteobacteria	Rhodobacterales	Rhodobacteraceae	Leucothrix	uncultured_bacterium
Taxa_1388	Bacteria	Proteobacteria	Gammaproteobacteria	Alteromonadales	Alteromonadaceae	Pseudoalteromonas	uncultured_bacterium
Taxa_1389	Bacteria	Proteobacteria	Alphaproteobacteria	Rhodobacterales	Rhodobacteraceae	uncultured	Marivita_sp.
Taxa_1390	Bacteria	Verrucomicrobiota	Verrucomicrobiae	Arctic97B-4_marine_group	Arctic97B-4_marine_group	Arctic97B-4_marine_group	uncultured_organism
Taxa_1393	Bacteria	Proteobacteria	Alphaproteobacteria	Rhizobiales	Beijerinckiaceae	Microvirga	uncultured_bacterium
Taxa_1395	Bacteria	PAUC34f	PAUC34f	PAUC34f	PAUC34f	PAUC34f	uncultured_bacterium
Taxa_1397	Bacteria	Proteobacteria	Gammaproteobacteria	Burkholderiales	Nitrosomonadaceae	Nitrosospira	uncultured_bacterium
Taxa_1398	Bacteria	Proteobacteria	Gammaproteobacteria	Alteromonadales	Alteromonadaceae	Salinimonas	uncultured_Alteromonas
Taxa_1399	Bacteria	Proteobacteria	Gammaproteobacteria	Alteromonadales	Colwelliaceae	Colwellia	Colwellia_sp.
Taxa_1400	Bacteria	Proteobacteria	Gammaproteobacteria	Alteromonadales	Pseudoalteromonadaceae	Pseudoalteromonas	Pseudoalteromonas_luteoviolacea
Taxa_1401	Bacteria	Proteobacteria	Gammaproteobacteria	Alteromonadales	Alteromonadaceae	Alteromonas	bacterium_RFB
Taxa_1402	Bacteria	Proteobacteria	Gammaproteobacteria	Pseudomonadales	Pseudomonadaceae	Pseudomonas	Agrobacterium_agile
Taxa_1403	Bacteria	Proteobacteria	Gammaproteobacteria	Alteromonadales	Nitrincolaceae	Neptuniibacter	uncultured_bacterium
Taxa_1404	Bacteria	Proteobacteria	Gammaproteobacteria	Burkholderiales	Comamonadaceae	Hydrogenophaga	uncultured_bacterium
Taxa_1405	Bacteria	Proteobacteria	Alphaproteobacteria	Rhodospirillales	Terasakiellaceae	uncultured	uncultured_bacterium
Taxa_1406	Bacteria	Proteobacteria	Alphaproteobacteria	Rhodospirillales	Magnetospiraceae	uncultured	uncultured_bacterium
Taxa_1407	Bacteria	Proteobacteria	Gammaproteobacteria	Cellvibrionales	Cellvibrionaceae	Candidatus_Endobugula	uncultured_bacterium
Taxa_1408	Bacteria	Bacteroidota	Bacteroidia	Flavobacteriales	Flavobacteriaceae	NS5_marine_group	uncultured_marine
Taxa_1409	Bacteria	Proteobacteria	Gammaproteobacteria	Thiotrichales	Thiotrichaceae	Leucothrix	uncultured_bacterium
Taxa_1410	Bacteria	Proteobacteria	Gammaproteobacteria	Enterobacterales	Yersiniaceae	Serratia	Serratia_plymuthica
Taxa_1411	Bacteria	Proteobacteria	Gammaproteobacteria	Cardiobacteriales	Cardiobacteriaceae	Cardiobacterium	uncultured_bacterium
Taxa_1414	Bacteria	Proteobacteria	Gammaproteobacteria	Aeromonadales	Aeromonadaceae	Aeromonas	Aeromonas_hydrophila
Taxa_1415	Bacteria	Proteobacteria	Gammaproteobacteria	Alteromonadales	Moritellaceae	Moritella	Moritella_viscosa
Taxa_1416	Bacteria	Proteobacteria	Gammaproteobacteria	Alteromonadales	Alteromonadaceae	Alcanivorax	uncultured_Alcanivorax
Taxa_1417	Bacteria	Proteobacteria	Alphaproteobacteria	Rhodobacterales	Rhodobacteraceae	uncultured	alpha_proteobacterium
Taxa_1422	Bacteria	Proteobacteria	Alphaproteobacteria	Rhodospirillales	Rhodospirillaceae	Thalassospira	uncultured_bacterium
Taxa_1425	Bacteria	Proteobacteria	Alphaproteobacteria	Rhodobacterales	Rhodobacteraceae	Amylibacter	uncultured_bacterium
Taxa_1428	Bacteria	Actinobacteriota	Actinobacteria	Propionibacteriales	Nocardioidaceae	Marmoricola	uncultured_bacterium
Taxa_1429	Bacteria	Proteobacteria	Gammaproteobacteria	Oceanospirillales	Alcanivoracaceae1	Alcanivorax	uncultured_gamma
Taxa_1430	Bacteria	Proteobacteria	Alphaproteobacteria	Rhodobacterales	Rhodobacteraceae	Maricaulis	uncultured_bacterium
Taxa_1432	Bacteria	Proteobacteria	Gammaproteobacteria	Ectothiorhodospirales	Thioalkalispiraceae	Thioalkalispira-Sulfurivermis	uncultured_bacterium
Taxa_1436	Bacteria	Actinobacteriota	Acidimicrobiia	IMCC26256	IMCC26256	IMCC26256	uncultured_bacterium
Taxa_1439	Bacteria	Proteobacteria	Alphaproteobacteria	Oceanospirillales	Alcanivoracaceae1	Alcanivorax	uncultured_bacterium
Taxa_1441	Bacteria	Proteobacteria	Gammaproteobacteria	Acidiferrobacterales	Acidiferrobacteraceae	uncultured	uncultured_bacterium
Taxa_1442	Bacteria	Proteobacteria	Gammaproteobacteria	Oceanospirillales	Alcanivoracaceae	Ketobacter	uncultured_gamma
Taxa_1444	Bacteria	Proteobacteria	Gammaproteobacteria	Enterobacterales	Hafniaceae	Hafnia-Obesumbacterium	uncultured_bacterium
Taxa_1449	Bacteria	Proteobacteria	Gammaproteobacteria	Enterobacterales	Erwiniaceae	Pantoea	Pantoea_dispersa
Taxa_1450	Bacteria	Proteobacteria	Gammaproteobacteria	Cardiobacteriales	Cardiobacteriaceae	uncultured	uncultured_bacterium
Taxa_1451	Bacteria	Proteobacteria	Gammaproteobacteria	Oceanospirillales	Alcanivoracaceae1	Alcanivorax	Alcanivorax_dieselolei
Taxa_1452	Bacteria	Proteobacteria	Gammaproteobacteria	Cellvibrionales	Cellvibrionaceae	Simiduia	Simiduia_agarivorans
Taxa_1465	Bacteria	Firmicutes	Bacilli	Lactobacillales	Enterococcaceae	Enterococcus	Enterococcus_casseliflavus
Taxa_1466	Bacteria	Proteobacteria	Gammaproteobacteria	Methylococcales	Cycloclasticaceae	Cycloclasticus	Cycloclasticus_sp.
Taxa_1467	Bacteria	Proteobacteria	Gammaproteobacteria	Oceanospirillales	Saccharospirillaceae	Marinobacterium	uncultured_bacterium
Taxa_1468	Bacteria	Desulfobacterota	Desulfuromonadia	Bradymonadales	Bradymonadaceae	Bradymonadaceae	uncultured_bacterium
Taxa_1469	Bacteria	Actinobacteriota	Actinobacteria	Micrococcales	Dermabacteraceae	Brachybacterium	Brachybacterium_sp.
Taxa_1470	Bacteria	Proteobacteria	Gammaproteobacteria	Oceanospirillales	Nitrincolaceae	Nitrincola	uncultured_bacterium
Taxa_1471	Bacteria	Planctomycetota	Planctomycetes	Pirellulales	Pirellulaceae	Blastopirellula	uncultured_planctomycete
Taxa_1472	Bacteria	Proteobacteria	Gammaproteobacteria	Vibrionales	Vibrionaceae	Vibrio	uncultured_Alteromonadales
Taxa_1473	Bacteria	Proteobacteria	Alphaproteobacteria	Rhodobacterales	Rhodobacteraceae	Pseudooceanicola	uncultured_bacterium
Taxa_1474	Bacteria	Bacteroidota	Bacteroidia	Bacteroidales	Prevotellaceae	Prevotella	uncultured_bacterium
Taxa_1475	Bacteria	Proteobacteria	Gammaproteobacteria	Alteromonadales	Shewanellaceae	Shewanella	Shewanella_gelidimarina
Taxa_1476	Bacteria	Bacteroidota	Bacteroidia	Flavobacteriales	Flavobacteriaceae	Vitellibacter	uncultured_bacterium
Taxa_1477	Bacteria	Verrucomicrobiota	Verrucomicrobiae	Verrucomicrobiales	Rubritaleaceae	Luteolibacter	uncultured_bacterium
Taxa_1478	Bacteria	Firmicutes	Bacilli	Bacillales	Bacillaceae	Bacillus	Bacillus_megaterium
Taxa_1479	Bacteria	Acidobacteriota	Vicinamibacteria	Vicinamibacterales	uncultured	uncultured	uncultured_bacterium
Taxa_1482	Bacteria	Proteobacteria	Alphaproteobacteria	Rhodospirillales	Azospirillaceae	uncultured	uncultured_bacterium
Taxa_1486	Bacteria	Proteobacteria	Gammaproteobacteria	Pasteurellales	Pasteurellaceae	Aggregatibacter	uncultured_bacterium
Taxa_1487	Bacteria	Proteobacteria	Gammaproteobacteria	Cellvibrionales	Spongiibacteraceae	Spongiibacter	Spongiibacter_tropicus
Taxa_1488	Bacteria	Proteobacteria	Gammaproteobacteria	Alteromonadales	Alteromonadaceae	Rheinheimera	Rheinheimera_sp.
Taxa_1490	Bacteria	Bacteroidota	Bacteroidia	Flavobacteriales	Flavobacteriaceae	Capnocytophaga	uncultured_bacterium
Taxa_1492	Bacteria	Nitrospinota	Nitrospinia	Nitrospinales	Nitrospinaceae	Nitrospina	uncultured_marine
Taxa_1493	Bacteria	Proteobacteria	Gammaproteobacteria	Burkholderiales	Comamonadaceae	Aquabacterium	uncultured_bacterium
Taxa_1494	Bacteria	Actinobacteriota	Actinobacteria	Propionibacteriales	Propionibacteriaceae	Cutibacterium	uncultured_organism
Taxa_1495	Bacteria	Proteobacteria	Alphaproteobacteria	Rhodobacterales	Rhodobacteraceae	Pseudorhodobacter	uncultured_bacterium
Taxa_1496	Bacteria	Proteobacteria	Alphaproteobacteria	Rhodobacterales	Rhodobacteraceae	Thalassobius	uncultured_bacterium
Taxa_1497	Bacteria	Cyanobacteria	Vampirivibrionia	Obscuribacterales	Obscuribacteraceae	Candidatus_Obscuribacter	uncultured_actinobacterium
Taxa_1498	Bacteria	Proteobacteria	Gammaproteobacteria	Oceanospirillales	Halomonadaceae	Cobetia	Halomonas_smyrnensis
Taxa_1499	Bacteria	Proteobacteria	Gammaproteobacteria	Alteromonadales	Psychromonadaceae	Aliagarivorans	Aliagarivorans_taiwanensis
Taxa_1500	Bacteria	Verrucomicrobiota	Verrucomicrobiae	Opitutales	Opitutaceae	Opitutus	uncultured_bacterium
Taxa_1501	Bacteria	Elusimicrobiota	Endomicrobia	Endomicrobiales	Endomicrobiaceae	Endomicrobium	uncultured_Termite
Taxa_1502	Bacteria	Proteobacteria	Gammaproteobacteria	Burkholderiales	Comamonadaceae	Rhizobacter	uncultured_bacterium
Taxa_1504	Bacteria	Actinobacteriota	Actinobacteria	Corynebacteriales	Nocardiaceae	Rhodococcus	Rhodococcus_sp.
Taxa_1505	Bacteria	Bacteroidota	Bacteroidia	Flavobacteriales	Flavobacteriaceae	Fluviicola	uncultured_bacterium
Taxa_1507	Bacteria	Proteobacteria	Gammaproteobacteria	Nitrosococcales	Methylophagaceae	Methylophaga	uncultured_Methylophaga
Taxa_1508	Bacteria	Elusimicrobiota	Elusimicrobia	Lineage_IV	Lineage_IV	Lineage_IV	uncultured_bacterium
Taxa_1511	Bacteria	Proteobacteria	Gammaproteobacteria	Alteromonadales	Alteromonadaceae	Aeromonas	uncultured_bacterium
Taxa_1513	Bacteria	Firmicutes	Clostridia	Peptostreptococcales-Tissierellales	Anaerovoracaceae	[Eubacterium]_brachy_group	uncultured_bacterium
Taxa_1515	Bacteria	Acidobacteriota	Acidobacteriae	Bryobacterales	Bryobacteraceae	Bryobacter	uncultured_bacterium
Taxa_1516	Bacteria	Nitrospirota	Nitrospiria	Nitrospirales	Nitrospiraceae	Nitrospira	uncultured_bacterium
Taxa_1519	Bacteria	Proteobacteria	Gammaproteobacteria	Salinisphaerales	Solimonadaceae	Nevskia	uncultured_bacterium
Taxa_1520	Bacteria	Actinobacteriota	Actinobacteria	Micrococcales	Microbacteriaceae	Parafrigoribacterium	uncultured_bacterium
Taxa_1521	Bacteria	Firmicutes	Bacilli	Lactobacillales	Carnobacteriaceae	Trichococcus	uncultured_bacterium
Taxa_1524	Bacteria	Proteobacteria	Gammaproteobacteria	Enterobacterales	Erwiniaceae	Pantoea	uncultured_bacterium
Taxa_1525	Bacteria	Proteobacteria	Gammaproteobacteria	Enterobacterales	Enterobacteriaceae	Escherichia-Shigella	uncultured_bacterium
Taxa_1526	Bacteria	Proteobacteria	Alphaproteobacteria	Rhodobacterales	Rhodobacteraceae	Rhodobacter	uncultured_bacterium
Taxa_1527	Bacteria	Bacteroidota	Bacteroidia	Flavobacteriales	Flavobacteriaceae	Salegentibacter	bacterium_YC-LK-LKJ10
Taxa_1528	Bacteria	Proteobacteria	Gammaproteobacteria	Enterobacterales	Enterobacteriaceae	Enterobacter	Enterobacter_hormaechei
Taxa_1529	Bacteria	Bacteroidota	Bacteroidia	Flavobacteriales	Flavobacteriaceae	NS9_marine_group	uncultured_bacterium
Taxa_1530	Bacteria	Actinobacteriota	Actinobacteria	Alteromonadales	Alteromonadaceae	Glaciecola	Glaciecola_sp.
Taxa_1531	Bacteria	Proteobacteria	Alphaproteobacteria	Sphingomonadales	Sphingomonadaceae	Erythrobacter	Porphyrobacter_sp.
Taxa_1532	Bacteria	Bacteroidota	Bacteroidia	Bacteroidales	Prevotellaceae	Alloprevotella	uncultured_bacterium
Taxa_1534	Bacteria	Proteobacteria	Gammaproteobacteria	Aeromonadales	Aeromonadaceae	Aeromonas	uncultured_gamma
Taxa_1551	Bacteria	Actinobacteriota	Actinobacteria	Corynebacteriales	Mycobacteriaceae	Mycobacterium	Mycobacterium_fluoranthenivorans
Taxa_1555	Bacteria	Bacteroidota	Bacteroidia	Flavobacteriales	Flavobacteriaceae	Croceibacter	Croceibacter_atlanticus
Taxa_1556	Bacteria	Proteobacteria	Gammaproteobacteria	Oceanospirillales	Saccharospirillaceae	Oleispira	uncultured_Oleispira
Taxa_1557	Bacteria	Proteobacteria	Gammaproteobacteria	Oceanospirillales	Marinomonadaceae	Marinomonas	uncultured_Marinomonas
Taxa_1558	Bacteria	Verrucomicrobiota	Verrucomicrobiae	Arctic97B-4_marine_group	Arctic97B-4_marine_group	Arctic97B-4_marine_group	uncultured_bacterium
Taxa_1559	Bacteria	Proteobacteria	Gammaproteobacteria	Oceanospirillales	Saccharospirillaceae	Oleispira	uncultured_bacterium
Taxa_1560	Bacteria	Proteobacteria	Alphaproteobacteria	Rhodobacterales	Rhodobacteraceae	Wigglesworthia	Wigglesworthia_glossinidia
Taxa_1572	Bacteria	Proteobacteria	Gammaproteobacteria	Alteromonadales	Aeromonadaceae	uncultured	uncultured_bacterium
Taxa_1573	Bacteria	Proteobacteria	Alphaproteobacteria	Rhodobacterales	Rhodobacteraceae	Granulosicoccus	uncultured_bacterium
Taxa_1579	Bacteria	Bdellovibrionota	Bdellovibrionia	Bacteriovoracales	Bacteriovoracaceae	Peredibacter	uncultured_Bacteriovoracaceae
Taxa_1580	Bacteria	Proteobacteria	Alphaproteobacteria	Rhodobacterales	Rhodobacteraceae	Pontivivens	uncultured_bacterium
Taxa_1581	Bacteria	Proteobacteria	Alphaproteobacteria	Micavibrionales	Rhodobacteraceae	uncultured	uncultured_bacterium
Taxa_1582	Bacteria	Bacteroidota	Bacteroidia	Flavobacteriales	Flavobacteriaceae	NS2b_marine_group	Galbibacter_sp.
Taxa_1583	Bacteria	Proteobacteria	Alphaproteobacteria	Rhodospirillales	Magnetospiraceae	Magnetovibrio	uncultured_bacterium
Taxa_1592	Bacteria	Bacteroidota	Bacteroidia	Flavobacteriales	Flavobacteriaceae	Jejudonia	uncultured_Bacteroidetes
Taxa_1593	Bacteria	Proteobacteria	Alphaproteobacteria	Rhizobiales	Rhizobiaceae	Martelella	Martelella_sp.
Taxa_1594	Bacteria	Proteobacteria	Alphaproteobacteria	Rhodobacterales	Rhodobacteraceae	Phaeobacter	Phaeobacter_inhibens
Taxa_1595	Bacteria	Proteobacteria	Gammaproteobacteria	Cellvibrionales	Spongiibacteraceae	Zhongshania	gamma_proteobacterium
Taxa_1596	Bacteria	Bacteroidota	Bacteroidia	Flavobacteriales	Flavobacteriaceae	NS3a_marine_group	uncultured_bacterium
Taxa_1597	Bacteria	Proteobacteria	Alphaproteobacteria	Thalassobaculales	Nisaeaceae	Nisaea	uncultured_OM75
Taxa_1598	Bacteria	Proteobacteria	Alphaproteobacteria	Rhodobacterales	Rhodobacteraceae	Aquimixticola	Rhodobacteraceae_bacterium
Taxa_1599	Bacteria	Proteobacteria	Alphaproteobacteria	Rhizobiales	Rhizobiaceae	Allorhizobium-Neorhizobium-Pararhizobium-Rhizobium	Rhizobium_sp.
Taxa_1600	Bacteria	Proteobacteria	Alphaproteobacteria	Rhodospirillales	Terasakiellaceae	uncultured	uncultured_Alphaproteobacteria
Taxa_1601	Bacteria	Proteobacteria	Alphaproteobacteria	Sphingomonadales	Sphingomonadaceae	uncultured	uncultured_Alphaproteobacteria
Taxa_1602	Bacteria	Proteobacteria	Alphaproteobacteria	Sphingomonadales	Sphingomonadaceae	Sphingorhabdus	Sphingopyxis_sp.
Taxa_1603	Bacteria	Proteobacteria	Gammaproteobacteria	Arenicellales	Arenicellaceae	uncultured	uncultured_gamma
Taxa_1604	Bacteria	Proteobacteria	Zetaproteobacteria	Mariprofundales	Mariprofundaceae	Mariprofundus	uncultured_bacterium
Taxa_1605	Bacteria	Proteobacteria	Alphaproteobacteria	Rhizobiales	Rhodobiaceae	Amorphus	Amorphus_suaedae
Taxa_1607	Bacteria	Proteobacteria	Gammaproteobacteria	Rhodospirillales	Thalassospiraceae	Thalassospira	Thalassospira_sp.
Taxa_1610	Bacteria	Proteobacteria	Alphaproteobacteria	Rhizobiales	Pleomorphomonadaceae	Pleomorphomonas	uncultured_bacterium
Taxa_1612	Bacteria	Proteobacteria	Alphaproteobacteria	Rhizobiales	Rhizobiaceae	Jiella	Aurantimonas_sp.
Taxa_1613	Bacteria	Proteobacteria	Gammaproteobacteria	Pseudomonadales	Moraxellaceae	Paraperlucidibaca	Paraperlucidibaca_wandonensis
Taxa_1615	Bacteria	Bacteroidota	Bacteroidia	Flavobacteriales	Crocinitomicaceae	Fluviicola	uncultured_marine
Taxa_1616	Bacteria	Campilobacterota	Campylobacteria	Campylobacterales	Arcobacteraceae	uncultured	uncultured_bacterium
Taxa_1617	Bacteria	Proteobacteria	Alphaproteobacteria	Rhizobiales	Rhizobiaceae	Pseudahrensia	Pseudahrensia_todarodis
Taxa_1618	Bacteria	Planctomycetota	Phycisphaerae	Phycisphaerales	Phycisphaeraceae	uncultured	uncultured_bacterium
Taxa_1619	Bacteria	Proteobacteria	Alphaproteobacteria	Rhodobacterales	Rhodobacteraceae	Phaeobacter	Sedimentitalea_todarodis
Taxa_1620	Bacteria	Proteobacteria	Alphaproteobacteria	Rhizobiales	Rhizobiales_Incertae_Sedis	Anderseniella	uncultured_Alphaproteobacteria
Taxa_1621	Bacteria	Firmicutes	Bacilli	Lactobacillales	Carnobacteriaceae	Atopostipes	uncultured_bacterium
Taxa_1622	Bacteria	Verrucomicrobiota	Kiritimatiellae	Kiritimatiellales	Kiritimatiellaceae	R76-B128	uncultured_Verrucomicrobia
Taxa_1623	Bacteria	Bacteroidota	Bacteroidia	Flavobacteriales	Crocinitomicaceae	Fluviicola	Cryomorphaceae_bacterium
Taxa_1624	Bacteria	Proteobacteria	Gammaproteobacteria	Oceanospirillales	Nitrincolaceae	Neptunomonas	Neptunomonas_qingdaonensis
Taxa_1625	Bacteria	Nitrospinota	Nitrospinia	Nitrospinales	Nitrospinaceae	Nitrospina	Nitrospina_sp.
Taxa_1626	Bacteria	Bacteroidota	Bacteroidia	Flavobacteriales	Flavobacteriaceae	Tenacibaculum	Tenacibaculum_dicentrarchi
Taxa_1627	Bacteria	Proteobacteria	Gammaproteobacteria	Alteromonadales	Psychromonadaceae	Agarivorans	Agarivorans_litoreus
Taxa_1628	Bacteria	Verrucomicrobiota	Verrucomicrobiae	Verrucomicrobiales	Rubritaleaceae	Persicirhabdus	uncultured_bacterium
Taxa_1629	Bacteria	Bacteroidota	Bacteroidia	Cytophagales	Cyclobacteriaceae	uncultured	uncultured_sediment
Taxa_1630	Bacteria	Proteobacteria	Alphaproteobacteria	Thalassobaculales	uncultured	uncultured	alpha_proteobacterium
Taxa_1631	Bacteria	Proteobacteria	Gammaproteobacteria	Cellvibrionales	Spongiibacteraceae	Litorivivens	Spongiibacter_sp.
Taxa_1632	Bacteria	Planctomycetota	Planctomycetes	Planctomycetales	Rubinisphaeraceae	Fuerstia	uncultured_bacterium
Taxa_1633	Bacteria	Proteobacteria	Gammaproteobacteria	Gammaproteobacteria_Incertae_Sedis	Unknown_Family	Unknown_Family	uncultured_bacterium
Taxa_1634	Bacteria	Proteobacteria	Alphaproteobacteria	Kiloniellales	Kiloniellaceae	Pelagibius	uncultured_bacterium
Taxa_1635	Bacteria	Proteobacteria	Alphaproteobacteria	Rhizobiales	Xanthobacteraceae	Afipia	uncultured_bacterium
Taxa_1636	Bacteria	Sumerlaeota	Sumerlaeia	Sumerlaeales	Sumerlaeaceae	Sumerlaea	uncultured_bacterium
Taxa_1637	Bacteria	Bacteroidota	Bacteroidia	Flavobacteriales	NS9_marine_group	NS9_marine_group	uncultured_Bacteroidetes
Taxa_1638	Bacteria	Proteobacteria	Alphaproteobacteria	Rhodobacterales	Rhodobacteraceae	Primorskyibacter	Primorskyibacter_sp.
Taxa_1639	Bacteria	Proteobacteria	Alphaproteobacteria	Puniceispirillales	SAR116_clade	SAR116_clade	uncultured_Alphaproteobacteria
Taxa_1640	Bacteria	Proteobacteria	Gammaproteobacteria	Oceanospirillales	Saccharospirillaceae	Reinekea	uncultured_bacterium
Taxa_1641	Bacteria	Verrucomicrobiota	Verrucomicrobiae	Verrucomicrobiales	Rubritaleaceae	Roseibacillus	uncultured_marine
Taxa_1642	Bacteria	Verrucomicrobiota	Omnitrophia	Omnitrophales	koll11	koll11	uncultured_bacterium
Taxa_1643	Bacteria	Cyanobacteria	Cyanobacteriia	Cyanobacteriales	Desertifilaceae	Hormoscilla_SI04-45	uncultured_Oscillatoriales
Taxa_1644	Bacteria	Proteobacteria	Gammaproteobacteria	pItb-vmat-80	pItb-vmat-80	pItb-vmat-80	uncultured_bacterium
Taxa_1645	Bacteria	Proteobacteria	Alphaproteobacteria	Rhizobiales	Rhodobacteraceae	Hyphomicrobium	uncultured_bacterium
Taxa_1646	Bacteria	Proteobacteria	Alphaproteobacteria	Rhodobacterales	Rhodobacteraceae	Lentimicrobium	uncultured_bacterium
Taxa_1648	Bacteria	Proteobacteria	Gammaproteobacteria	Oceanospirillales	Endozoicomonadaceae	Endozoicomonas	Endozoicomonas_sp.
Taxa_1652	Bacteria	Proteobacteria	Alphaproteobacteria	Rhodobacterales	Rhodobacteraceae	Amaricoccus	uncultured_bacterium
Taxa_1654	Bacteria	Proteobacteria	Alphaproteobacteria	Caulobacterales	Hyphomonadaceae	Maricaulis	Maricaulis_maris
Taxa_1657	Bacteria	Proteobacteria	Alphaproteobacteria	Rhodobacterales	Rhodobacteraceae	Rhodobacteraceae	Kandeliimicrobium_roseum
Taxa_1659	Bacteria	Proteobacteria	Gammaproteobacteria	Alteromonadales	Psychromonadaceae	Psychromonas	Psychromonas_ossibalaenae
Taxa_1660	Bacteria	Proteobacteria	Gammaproteobacteria	Immundisolibacterales	Immundisolibacteraceae	uncultured	uncultured_bacterium
Taxa_1661	Bacteria	Proteobacteria	Alphaproteobacteria	Caedibacterales	Caedibacteraceae	uncultured	uncultured_bacterium
Taxa_1663	Bacteria	Proteobacteria	Alphaproteobacteria	Rhodobacterales	Rhodobacteraceae	Sphingomonas	uncultured_bacterium
Taxa_1664	Bacteria	Proteobacteria	Gammaproteobacteria	AT-s2-59	AT-s2-59	AT-s2-59	uncultured_bacterium
Taxa_1672	Bacteria	Proteobacteria	Alphaproteobacteria	Caulobacterales	Hyphomonadaceae	Hyphomonas	Hyphomonas_johnsonii
Taxa_1673	Bacteria	Bacteroidota	Bacteroidia	Cytophagales	Cyclobacteriaceae	Roseivirga	uncultured_bacterium
Taxa_1674	Bacteria	Bacteroidota	Bacteroidia	Chitinophagales	Saprospiraceae	uncultured	uncultured_bacterium
Taxa_1675	Bacteria	Proteobacteria	Gammaproteobacteria	Legionellales	Legionellaceae	Legionella	uncultured_bacterium
Taxa_1676	Bacteria	Bacteroidota	Rhodothermia	Balneolales	Balneolaceae	Balneola	uncultured_Bacteroidetes
Taxa_1677	Bacteria	Proteobacteria	Gammaproteobacteria	EC3	EC3	EC3	uncultured_bacterium
Taxa_1678	Bacteria	Planctomycetota	Phycisphaerae	Phycisphaerales	Phycisphaeraceae	SM1A02	uncultured_Algisphaera
Taxa_1679	Bacteria	Proteobacteria	Alphaproteobacteria	NRL2	NRL2	NRL2	uncultured_bacterium
Taxa_1680	Bacteria	Proteobacteria	Gammaproteobacteria	Coxiellales	Coxiellaceae	Coxiella	uncultured_marine
Taxa_1681	Bacteria	Proteobacteria	Alphaproteobacteria	Puniceispirillales	SAR116_clade	SAR116_clade	uncultured_marine
Taxa_1682	Bacteria	Bacteroidota	Bacteroidia	Chitinophagales	Saprospiraceae	Saprospira	Saprospira_grandis
Taxa_1683	Bacteria	Bacteroidota	Bacteroidia	Chitinophagales	Saprospiraceae	uncultured	Saccharina_japonica
Taxa_1684	Bacteria	Verrucomicrobiota	Verrucomicrobiae	Pedosphaerales	Pedosphaeraceae	SCGC_AAA164-E04	uncultured_Verrucomicrobia
Taxa_1685	Bacteria	Bacteroidota	Bacteroidia	Chitinophagales	Saprospiraceae	Lewinella	uncultured_bacterium
Taxa_1686	Bacteria	Actinobacteriota	Actinobacteria	Corynebacteriales	Nocardiaceae	Rhodococcus	Rhodococcus_erythropolis
Taxa_1687	Bacteria	Bdellovibrionota	Bdellovibrionia	Bacteriovoracales	Bacteriovoracaceae	uncultured	uncultured_delta
Taxa_1688	Bacteria	Proteobacteria	Alphaproteobacteria	Rhodobacterales	Rhodobacteraceae	Rhodobacteraceae	Celeribacter_manganoxidans
Taxa_1689	Bacteria	Bacteroidota	Bacteroidia	Chitinophagales	uncultured	uncultured	uncultured_bacterium
Taxa_1691	Bacteria	Proteobacteria	Alphaproteobacteria	Parvibaculales	uncultured	uncultured	Saccharina_japonica
Taxa_1692	Bacteria	Bacteroidota	Bacteroidia	Flavobacteriales	Cryomorphaceae	Owenweeksia	Cryomorphaceae_bacterium
Taxa_1693	Bacteria	Proteobacteria	Alphaproteobacteria	Caulobacterales	Hyphomonadaceae	Maricaulis	alpha_proteobacterium
Taxa_1694	Bacteria	Proteobacteria	Alphaproteobacteria	Caulobacterales	Hyphomonadaceae	Hyphomonas	Hyphomonas_chukchiensis
Taxa_1695	Bacteria	Bacteroidota	Bacteroidia	Chitinophagales	Saprospiraceae	Lewinella	Lewinella_cohaerens
Taxa_1696	Bacteria	Bacteroidota	Bacteroidia	Flavobacteriales	Crocinitomicaceae	Fluviicola	uncultured_bacterium
Taxa_1697	Bacteria	Proteobacteria	Alphaproteobacteria	Rhizobiales	Rhodobacteraceae	uncultured	uncultured_Alphaproteobacteria
Taxa_1699	Bacteria	Proteobacteria	Gammaproteobacteria	Caulobacterales	Hyphomonadaceae	Hyphomonas	Citrobacter_sp.
Taxa_1700	Bacteria	Proteobacteria	Gammaproteobacteria	Cellvibrionales	Woeseiaceae	Woeseia	uncultured_gamma
Taxa_1701	Bacteria	Proteobacteria	Alphaproteobacteria	Rhodobacterales	Rhodobacteraceae	Cribrihabitans	uncultured_Rhodobacteraceae
Taxa_1702	Bacteria	Proteobacteria	Alphaproteobacteria	Caulobacterales	Caulobacteraceae	Caulobacter	Caulobacter_sp.
Taxa_1703	Bacteria	Proteobacteria	Alphaproteobacteria	Rhizobiales	Rhizobiales_Incertae_Sedis	Anderseniella	uncultured_bacterium
Taxa_1706	Bacteria	Actinobacteriota	Actinobacteria	Micrococcales	Microbacteriaceae	Parafrigoribacterium	Glaciihabitans_tibetensis
Taxa_1707	Bacteria	Proteobacteria	Alphaproteobacteria	Rhodobacterales	Rhodobacteraceae	Iodidimonas	uncultured_bacterium
Taxa_1708	Bacteria	Proteobacteria	Gammaproteobacteria	Pseudomonadales	Pseudomonadaceae	Pseudomonas	uncultured_gamma
Taxa_1709	Bacteria	Proteobacteria	Gammaproteobacteria	Methylococcales	Methylomonadaceae	uncultured	uncultured_bacterium
Taxa_1712	Bacteria	Actinobacteriota	Actinobacteria	Propionibacteriales	Nocardioidaceae	Aeromicrobium	Aeromicrobium_sp.
Taxa_1714	Bacteria	Proteobacteria	Alphaproteobacteria	Rhizobiales	Rhizobiaceae	Jiella	Jiella_aquimaris
Taxa_1715	Bacteria	Proteobacteria	Alphaproteobacteria	Puniceispirillales	SAR116_clade	SAR116_clade	uncultured_Oceanibaculum
Taxa_1717	Bacteria	Proteobacteria	Alphaproteobacteria	Caulobacterales	Parvularculaceae	uncultured	uncultured_organism
Taxa_1721	Bacteria	Proteobacteria	Alphaproteobacteria	Caulobacterales	Hyphomonadaceae	Hirschia	metagenome
Taxa_1723	Bacteria	Proteobacteria	Gammaproteobacteria	Enterobacterales	Enterobacteriaceae	OM27_clade	uncultured_bacterium
Taxa_1726	Bacteria	Proteobacteria	Alphaproteobacteria	Rickettsiales	SM2D12	uncultured	uncultured_bacterium
Taxa_1730	Bacteria	Proteobacteria	Alphaproteobacteria	Rhizobiales	Beijerinckiaceae	Methylobacterium-Methylorubrum	Methylobacterium_fujisawaense
Taxa_1731	Bacteria	Proteobacteria	Gammaproteobacteria	Methylococcales	Methylomonadaceae	Methylobacter	uncultured_bacterium
Taxa_1732	Bacteria	Bacteroidota	Bacteroidia	Bacteroidetes_VC2.1_Bac22	Bacteroidetes_VC2.1_Bac22	Bacteroidetes_VC2.1_Bac22	uncultured_bacterium
Taxa_1733	Bacteria	Proteobacteria	Gammaproteobacteria	UBA10353_marine_group	UBA10353_marine_group	UBA10353_marine_group	uncultured_gamma
Taxa_1736	Bacteria	Proteobacteria	Alphaproteobacteria	Rhizobiales	PS1_clade	PS1_clade	uncultured_bacterium
Taxa_1739	Bacteria	Proteobacteria	Alphaproteobacteria	Caulobacterales	Caulobacteraceae	Brevundimonas	Brevundimonas_sp.
Taxa_1740	Bacteria	Bacteroidota	Bacteroidia	Flavobacteriales	Flavobacteriaceae	Muricauda	Muricauda_sp.
Taxa_1741	Bacteria	Bacteroidota	Bacteroidia	Flavobacteriales	Flavobacteriaceae	Winogradskyella	uncultured_Bacteroidetes
Taxa_1742	Bacteria	Proteobacteria	Alphaproteobacteria	Sphingomonadales	Sphingomonadaceae	Sphingorhabdus	uncultured_Sphingopyxis
Taxa_1743	Bacteria	Proteobacteria	Gammaproteobacteria	Alteromonadales	Alteromonadaceae	Oleibacter	uncultured_bacterium
Taxa_1745	Bacteria	Proteobacteria	Alphaproteobacteria	SAR11_clade	Clade_IV	Clade_IV	uncultured_marine
Taxa_1747	Bacteria	Proteobacteria	Alphaproteobacteria	Rhodobacterales	Rhodobacteraceae	Amaricoccus	metagenome
Taxa_1748	Bacteria	Planctomycetota	Planctomycetes	Pirellulales	Pirellulaceae	Rhodopirellula	marine_metagenome
Taxa_1749	Bacteria	Proteobacteria	Gammaproteobacteria	Bdellovibrionales	Bdellovibrionaceae	OM27_clade	uncultured_bacterium
Taxa_1750	Bacteria	Proteobacteria	Alphaproteobacteria	Alteromonadales	Alteromonadaceae	Alteromonas	uncultured_bacterium
Taxa_1752	Bacteria	Dependentiae	Babeliae	Babeliales	Babeliaceae	Babeliaceae	uncultured_bacterium
Taxa_1754	Bacteria	Proteobacteria	Alphaproteobacteria	Sphingomonadales	Sphingomonadaceae	Novosphingobium	Novosphingobium_sp.
Taxa_1756	Bacteria	Proteobacteria	Gammaproteobacteria	Caulobacterales	Hyphomonadaceae	Hyphomonas	uncultured_bacterium
Taxa_1758	Bacteria	Proteobacteria	Alphaproteobacteria	Rhodobacterales	Rhodobacteraceae	Jannaschia	uncultured_Jannaschia
Taxa_1759	Bacteria	Proteobacteria	Gammaproteobacteria	Thiotrichales	Thiotrichaceae	Thiothrix	uncultured_gamma
Taxa_1760	Bacteria	Proteobacteria	Alphaproteobacteria	Rhodobacterales	Rhodobacteraceae	Profundibacterium	marine_sediment
Taxa_1761	Bacteria	Planctomycetota	Planctomycetes	Pirellulales	Pirellulaceae	Rubripirellula	uncultured_bacterium
Taxa_1762	Bacteria	Proteobacteria	Alphaproteobacteria	Rhodobacterales	Rhodobacteraceae	Amylibacter	uncultured_Rhodobacteraceae
Taxa_1763	Bacteria	Proteobacteria	Alphaproteobacteria	Rhodobacterales	Rhodobacteraceae	Tropicimonas	Tropicimonas_arenosa
Taxa_1765	Bacteria	Proteobacteria	Alphaproteobacteria	Sphingomonadales	Sphingomonadaceae	Erythrobacter	Erythrobacter_atlanticus
Taxa_1769	Bacteria	Proteobacteria	Gammaproteobacteria	Alteromonadales	Alteromonadaceae	Paraglaciecola	gas_vacuolate
Taxa_1771	Bacteria	Proteobacteria	Gammaproteobacteria	Arenicellales	Arenicellaceae	HTCC5015	uncultured_bacterium
Taxa_1772	Bacteria	Proteobacteria	Alphaproteobacteria	Elsterales	uncultured	uncultured	uncultured_bacterium
Taxa_1774	Bacteria	Proteobacteria	Alphaproteobacteria	Caulobacterales	Hyphomonadaceae	Algimonas	uncultured_bacterium
Taxa_1776	Bacteria	Planctomycetota	Planctomycetes	Pirellulales	Pirellulaceae	Rubripirellula	uncultured_Planctomycetaceae
Taxa_1777	Bacteria	Verrucomicrobiota	Verrucomicrobiae	Pedosphaerales	Pedosphaeraceae	SCGC_AAA164-E04	uncultured_bacterium
Taxa_1778	Bacteria	Proteobacteria	Gammaproteobacteria	Pseudomonadales	Moraxellaceae	Paraperlucidibaca	uncultured_bacterium
Taxa_1780	Bacteria	Proteobacteria	Gammaproteobacteria	Rhodobacterales	Rhodobacteraceae	uncultured	uncultured_bacterium
Taxa_1781	Bacteria	Proteobacteria	Alphaproteobacteria	Paracaedibacterales	Paracaedibacteraceae	uncultured	uncultured_bacterium
Taxa_1782	Bacteria	Cyanobacteria	Cyanobacteriia	Synechococcales	Cyanobiaceae	Synechococcus_CC9902	uncultured_marine
Taxa_1783	Bacteria	Proteobacteria	Alphaproteobacteria	Caulobacterales	Caulobacteraceae	uncultured	uncultured_bacterium
Taxa_1786	Bacteria	Proteobacteria	Alphaproteobacteria	Rhizobiales	Devosiaceae	Devosia	Devosia_sp.
Taxa_1788	Bacteria	Bacteroidota	Bacteroidia	Flavobacteriales	Flavobacteriaceae	Arenibacter	Arenibacter_sp.
Taxa_1789	Bacteria	Proteobacteria	Gammaproteobacteria	Desulfovibrionales	Desulfovibrionaceae	Desulfovibrio	uncultured_bacterium
Taxa_1790	Bacteria	Proteobacteria	Alphaproteobacteria	Rhizobiales	Rhizobiaceae	uncultured	uncultured_Rhizobiales
Taxa_1791	Bacteria	Proteobacteria	Gammaproteobacteria	Rhodospirillales	Thalassospiraceae	Thalassospira	uncultured_bacterium
Taxa_1793	Bacteria	Proteobacteria	Gammaproteobacteria	Thalassobaculales	Nisaeaceae	Nisaea	Nisaea_acidiphila
Taxa_1794	Bacteria	Proteobacteria	Alphaproteobacteria	Rhizobiales	Hyphomonadaceae	Hyphomonas	uncultured_bacterium
Taxa_1795	Bacteria	Proteobacteria	Gammaproteobacteria	Oceanospirillales	Alcanivoracaceae	Ketobacter	uncultured_marine
Taxa_1796	Bacteria	Proteobacteria	Alphaproteobacteria	Caulobacterales	Hyphomonadaceae	Hyphomonas	uncultured_Hyphomonas
Taxa_1798	Bacteria	Proteobacteria	Gammaproteobacteria	Cellvibrionales	Spongiibacteraceae	Zhongshania	uncultured_bacterium
Taxa_1800	Bacteria	Proteobacteria	Alphaproteobacteria	Rhodospirillales	Magnetospirillaceae	Magnetospirillum	alpha_proteobacterium
Taxa_1802	Bacteria	Proteobacteria	Gammaproteobacteria	Oceanospirillales	Rhodobacteraceae	uncultured	uncultured_bacterium
Taxa_1804	Bacteria	Proteobacteria	Alphaproteobacteria	Rhodobacterales	Rhodobacteraceae	Aquamicrobium	uncultured_bacterium
Taxa_1805	Bacteria	Proteobacteria	Alphaproteobacteria	Rhodospirillales	Magnetospirillaceae	Magnetospirillum	uncultured_bacterium
Taxa_1806	Bacteria	Proteobacteria	Alphaproteobacteria	Rhodobacterales	Rhodobacteraceae	Flavimaricola	uncultured_Alphaproteobacteria
Taxa_1807	Bacteria	Bacteroidota	Bacteroidia	Flavobacteriales	Flavobacteriaceae	Zunongwangia	uncultured_Bacteroidetes
Taxa_1809	Bacteria	Proteobacteria	Gammaproteobacteria	Methylococcales	Methylomonadaceae	uncultured	uncultured_Methylobacter
Taxa_1811	Bacteria	Proteobacteria	Alphaproteobacteria	Rhizobiales	Rhodobacteraceae	Thioclava	uncultured_bacterium
Taxa_1813	Bacteria	Proteobacteria	Gammaproteobacteria	Oceanospirillales	uncultured	uncultured	uncultured_bacterium
Taxa_1814	Bacteria	Proteobacteria	Alphaproteobacteria	Rhizobiales	Rhizobiaceae	Phyllobacterium	Phyllobacterium_salinisoli
Taxa_1817	Bacteria	Proteobacteria	Gammaproteobacteria	Enterobacterales	Budviciaceae	Pragia	Pragia_fontium
Taxa_1818	Bacteria	Proteobacteria	Alphaproteobacteria	Rhizobiales	Rhizobiaceae	Marinobacterium	uncultured_bacterium
Taxa_1822	Bacteria	Proteobacteria	Gammaproteobacteria	Vibrionales	Vibrionaceae	UBA10353_marine_group	uncultured_bacterium
Taxa_1823	Bacteria	Proteobacteria	Alphaproteobacteria	Thalassobaculales	Nisaeaceae	Nisaea	uncultured_bacterium
Taxa_1824	Bacteria	Proteobacteria	Alphaproteobacteria	Caulobacterales	Parvularculaceae	Parvularcula	uncultured_bacterium
Taxa_1826	Bacteria	Proteobacteria	Gammaproteobacteria	Alteromonadales	Alteromonadaceae	Aliiglaciecola	uncultured_bacterium
Taxa_1827	Bacteria	Proteobacteria	Alphaproteobacteria	Desulfovibrionales	Desulfovibrionaceae	Desulfovibrio	uncultured_bacterium
Taxa_1832	Bacteria	Proteobacteria	Alphaproteobacteria	Rhodospirillales	uncultured	uncultured	uncultured_Alphaproteobacteria
Taxa_1833	Bacteria	Proteobacteria	Alphaproteobacteria	Rhodospirillales	uncultured	uncultured	uncultured_bacterium
Taxa_1835	Bacteria	Bacteroidota	Bacteroidia	Flavobacteriales	Flavobacteriaceae	Gramella	Gramella_aquimixticola
Taxa_1837	Bacteria	Proteobacteria	Gammaproteobacteria	Pseudomonadales	Pseudomonadaceae	Pseudomonas	Pseudomonas_putida
Taxa_1839	Bacteria	Proteobacteria	Alphaproteobacteria	Rhodobacterales	Rhodobacteraceae	Phaeobacter	Phaeobacter_sp.
Taxa_1840	Bacteria	Proteobacteria	Gammaproteobacteria	Alteromonadales	Shewanellaceae	Shewanella	Shewanella_frigidimarina
Taxa_1841	Bacteria	Bacteroidota	Bacteroidia	Chitinophagales	Saprospiraceae	Rubidimonas	uncultured_bacterium
Taxa_1842	Bacteria	Proteobacteria	Alphaproteobacteria	Rhizobiales	Beijerinckiaceae	Bosea	Bosea_sp.
Taxa_1843	Bacteria	Proteobacteria	Gammaproteobacteria	Alteromonadales	Alteromonadaceae	Ketobacter	uncultured_bacterium
Taxa_1844	Bacteria	Proteobacteria	Alphaproteobacteria	Thalassobaculales	Nisaeaceae	Nisaea	Nisaea_acidiphila
Taxa_1845	Bacteria	Bdellovibrionota	Bdellovibrionia	Bacteriovoracales	Bacteriovoracaceae	Peredibacter	uncultured_organism
Taxa_1846	Bacteria	Proteobacteria	Alphaproteobacteria	Caulobacterales	Caulobacteraceae	Caulobacter	bacterium_endosymbiont
Taxa_1847	Bacteria	Proteobacteria	Gammaproteobacteria	Elsterales	uncultured	uncultured	uncultured_bacterium
Taxa_1848	Bacteria	Proteobacteria	Gammaproteobacteria	Rhodobacterales	Rhodobacteraceae	Candidatus_Tenderia	uncultured_gamma
Taxa_1849	Bacteria	Bacteroidota	Bacteroidia	Flavobacteriales	Flavobacteriaceae	Jejuia	uncultured_bacterium
Taxa_1850	Bacteria	Proteobacteria	Alphaproteobacteria	Rhizobiales	Rhodobiaceae	Tepidamorphus	uncultured_bacterium
Taxa_1851	Bacteria	Bacteroidota	Bacteroidia	Sphingobacteriales	Lentimicrobiaceae	Lentimicrobium	uncultured_bacterium
Taxa_1852	Bacteria	Proteobacteria	Gammaproteobacteria	Enterobacterales	Bdellovibrionaceae	OM27_clade	uncultured_bacterium
Taxa_1853	Bacteria	Desulfobacterota	Desulfuromonadia	Desulfuromonadia	Desulfuromonadaceae	Desulfuromonas	uncultured_bacterium
Taxa_1856	Bacteria	Proteobacteria	Alphaproteobacteria	Cellvibrionales	Spongiibacteraceae	Zhongshania	uncultured_bacterium
Taxa_1857	Bacteria	Proteobacteria	Alphaproteobacteria	Caulobacterales	Parvularculaceae	Parvularcula	uncultured_organism
Taxa_1858	Bacteria	Proteobacteria	Gammaproteobacteria	Rhodobacterales	Rhodobacteraceae	Thalassococcus	uncultured_bacterium
Taxa_1859	Bacteria	Proteobacteria	Alphaproteobacteria	Rhizobiales	Pleomorphomonadaceae	Chthonobacter	uncultured_bacterium
Taxa_1861	Bacteria	Proteobacteria	Gammaproteobacteria	Arenicellales	Arenicellaceae	Candidatus_Thiosymbion	uncultured_bacterium
Taxa_1863	Bacteria	Proteobacteria	Gammaproteobacteria	Alteromonadales	Alteromonadaceae	Cycloclasticus	Cycloclasticus_pugetii
Taxa_1868	Bacteria	Proteobacteria	Gammaproteobacteria	Alteromonadales	Colwelliaceae	Colwellia	uncultured_gamma
Taxa_1869	Bacteria	Bacteroidota	Bacteroidia	Flavobacteriales	Cryomorphaceae	Vicingus	uncultured_Owenweeksia
Taxa_1870	Bacteria	Proteobacteria	Gammaproteobacteria	Nitrococcales	Nitrococcaceae	Halopeptonella	uncultured_bacterium
Taxa_1872	Bacteria	Proteobacteria	Gammaproteobacteria	Cellvibrionales	Cellvibrionaceae	Umboniibacter	uncultured_bacterium
Taxa_1873	Bacteria	Proteobacteria	Gammaproteobacteria	Proteobacteria	Proteobacteria	Proteobacteria	uncultured_bacterium
Taxa_1878	Bacteria	Proteobacteria	Alphaproteobacteria	Caulobacterales	Caulobacteraceae	PMMR1	uncultured_bacterium
Taxa_1879	Bacteria	Proteobacteria	Gammaproteobacteria	Thiotrichales	Thiotrichaceae	Cocleimonas	uncultured_bacterium
Taxa_1880	Bacteria	Proteobacteria	Alphaproteobacteria	Rhizobiales	Rhodospirillaceae	uncultured	uncultured_bacterium
Taxa_1881	Bacteria	Bacteroidota	Bacteroidia	Flavobacteriales	Flavobacteriaceae	Maribacter	Bacteroidetes_bacterium
Taxa_1882	Bacteria	Planctomycetota	Phycisphaerae	Phycisphaerales	Phycisphaeraceae	CL500-3	uncultured_Phycisphaeraceae
Taxa_1883	Bacteria	Proteobacteria	Alphaproteobacteria	Rhizobiales	Rhizobiaceae	Hoeflea	uncultured_bacterium
Taxa_1884	Bacteria	Proteobacteria	Gammaproteobacteria	Orbales	Orbaceae	Pseudomonas	uncultured_bacterium
Taxa_1887	Bacteria	Proteobacteria	Gammaproteobacteria	Vibrionales	Vibrionaceae	Salinivibrio	uncultured_bacterium
Taxa_1888	Bacteria	Proteobacteria	Alphaproteobacteria	Thalassobaculales	Nisaeaceae	Nisaea	uncultured_Rhodospirillaceae
Taxa_1889	Bacteria	Proteobacteria	Gammaproteobacteria	Sphingomonadales	Sphingomonadaceae	Sphingopyxis	uncultured_bacterium
Taxa_1890	Bacteria	Desulfobacterota	Desulfovibrionia	Desulfovibrionales	Desulfovibrionaceae	Desulfovibrio	Desulfovibrio_longus
Taxa_1893	Bacteria	Proteobacteria	Gammaproteobacteria	Xanthomonadales	Xanthomonadaceae	Pseudoxanthomonas	Xanthomonas_sp.
Taxa_1894	Bacteria	Proteobacteria	Alphaproteobacteria	Sphingomonadales	Sphingomonadaceae	Sandaracinobacter	uncultured_bacterium
Taxa_1896	Bacteria	Proteobacteria	Gammaproteobacteria	Alteromonadales	Alteromonadaceae	Aliiglaciecola	uncultured_deep-sea
Taxa_1899	Bacteria	Proteobacteria	Gammaproteobacteria	Ectothiorhodospirales	Ectothiorhodospiraceae	Thiogranum	uncultured_bacterium
Taxa_1900	Bacteria	Desulfobacterota	Desulfobacteria	Desulfobacterales	Desulfobacteraceae	Desulfotignum	uncultured_bacterium
Taxa_1901	Bacteria	Firmicutes	Desulfitobacteriia	Desulfitobacteriales	Syntrophobotulaceae	Dehalobacter	uncultured_bacterium
Taxa_1902	Bacteria	Proteobacteria	Gammaproteobacteria	Burkholderiales	Alcaligenaceae	Bordetella	uncultured_bacterium
Taxa_1903	Bacteria	Deferribacterota	Deferribacteres	Deferribacterales	Deferribacteraceae	Denitrovibrio	Denitrovibrio_acetiphilus
Taxa_1904	Bacteria	Proteobacteria	Alphaproteobacteria	Rhizobiales	Rhizobiaceae	uncultured	alpha_proteobacterium
Taxa_1905	Bacteria	Proteobacteria	Gammaproteobacteria	Cellvibrionales	Cellvibrionaceae	uncultured	uncultured_organism
Taxa_1906	Bacteria	Bacteroidota	Bacteroidia	Flavobacteriales	Flavobacteriaceae	Flavobacterium	uncultured_Bacteroidetes
Taxa_1907	Bacteria	Proteobacteria	Gammaproteobacteria	Vibrionales	Vibrionaceae	Vibrio	bacterium_TCBS213-7
Taxa_1908	Bacteria	Desulfobacterota	Desulfuromonadia	Desulfuromonadia	Syntrophotaleaceae	Syntrophotalea	uncultured_bacterium
Taxa_1912	Bacteria	Proteobacteria	Alphaproteobacteria	Rhodospirillales	Thalassospiraceae	Thalassospira	Thalassospira_marina
Taxa_1913	Bacteria	Proteobacteria	Gammaproteobacteria	Oceanospirillales	Thioalkalispiraceae	Thioalkalispira-Sulfurivermis	uncultured_bacterium
Taxa_1917	Bacteria	Proteobacteria	Gammaproteobacteria	Oceanospirillales	Thiotrichaceae	uncultured	uncultured_bacterium
Taxa_1918	Bacteria	Proteobacteria	Alphaproteobacteria	Rhodobacterales	Rhodobacteraceae	Maritalea	Maritalea_sp.
Taxa_1920	Bacteria	Proteobacteria	Gammaproteobacteria	Oceanospirillales	Alcanivoracaceae1	uncultured	uncultured_bacterium
Taxa_1921	Bacteria	Desulfobacterota	Desulfovibrionia	Desulfovibrionales	Desulfomicrobiaceae	Desulfomicrobium	Desulfomicrobium_sp.
Taxa_1924	Bacteria	Proteobacteria	Alphaproteobacteria	Rhodobacterales	Rhodobacteraceae	Litorimicrobium	uncultured_Alphaproteobacteria
Taxa_1925	Bacteria	Bacteroidota	Bacteroidia	Bacteroidales	Rikenellaceae	uncultured	uncultured_bacterium
Taxa_1927	Bacteria	Proteobacteria	Gammaproteobacteria	Pseudomonadales	Pseudomonadaceae	Pseudomonas	Pseudomonas_sabulinigri
Taxa_1928	Bacteria	Bacteroidota	Bacteroidia	Bacteroidales	Rikenellaceae	uncultured	bacterium
Taxa_1929	Bacteria	Proteobacteria	Gammaproteobacteria	Cellvibrionales	Spongiibacteraceae	Zhongshania	Zhongshania_aliphaticivorans
Taxa_1933	Bacteria	Proteobacteria	Alphaproteobacteria	Caulobacterales	Hyphomonadaceae	Hyphomonas	Hyphomonas_jannaschiana
Taxa_1934	Bacteria	Proteobacteria	Gammaproteobacteria	Oceanospirillales	Pseudomonadaceae	Pseudomonas	uncultured_bacterium
Taxa_1935	Bacteria	Proteobacteria	Gammaproteobacteria	Enterobacterales	Nitrosomonadaceae	Nitrosomonas	Nitrosomonas_europaea
Taxa_1936	Bacteria	Proteobacteria	Gammaproteobacteria	Burkholderiales	Burkholderiaceae	Limnobacter	uncultured_bacterium
Taxa_1937	Bacteria	Bacteroidota	Bacteroidia	Sphingobacteriales	env.OPS_17	env.OPS_17	Tuber_borchii
Taxa_1938	Bacteria	Proteobacteria	Alphaproteobacteria	Puniceispirillales	uncultured	uncultured	uncultured_Alphaproteobacteria
Taxa_1939	Bacteria	Proteobacteria	Gammaproteobacteria	Burkholderiales	Neisseriaceae	Eikenella	uncultured_bacterium
Taxa_1940	Bacteria	Proteobacteria	Alphaproteobacteria	Sphingomonadales	Sphingomonadaceae	Sphingopyxis	uncultured_bacterium
Taxa_1941	Bacteria	Proteobacteria	Gammaproteobacteria	Pseudomonadales	Moraxellaceae	Acinetobacter	Acinetobacter_lwoffii
Taxa_1942	Bacteria	Actinobacteriota	Actinobacteria	Bifidobacteriales	Bifidobacteriaceae	Bifidobacterium	uncultured_bacterium
Taxa_1943	Bacteria	Proteobacteria	Gammaproteobacteria	Burkholderiales	Comamonadaceae	Variovorax	Variovorax_sp.
Taxa_1944	Bacteria	Firmicutes	Bacilli	Bacillales	Bacillaceae	Geobacillus	Geobacillus_sp.
Taxa_1945	Bacteria	Actinobacteriota	Actinobacteria	Corynebacteriales	Corynebacteriaceae	Lawsonella	uncultured_bacterium
Taxa_1946	Bacteria	Proteobacteria	Alphaproteobacteria	Sphingomonadales	Sphingomonadaceae	Thalassotalea	Thalassomonas_sp.
Taxa_1948	Archaea	Euryarchaeota	Methanobacteria	Methanobacteriales	Methanobacteriaceae	Methanobrevibacter	Methanobrevibacter_smithii
Taxa_1949	Bacteria	Proteobacteria	Alphaproteobacteria	Azospirillales	Inquilinaceae	Inquilinus	uncultured_Alphaproteobacteria
Taxa_1950	Bacteria	Proteobacteria	Alphaproteobacteria	Rhizobiales	Beijerinckiaceae	Methylobacterium-Methylorubrum	Methylobacterium_aquaticum
Taxa_1951	Bacteria	Firmicutes	Bacilli	Staphylococcales	Staphylococcaceae	Jeotgalicoccus	uncultured_bacterium
Taxa_1952	Bacteria	Proteobacteria	Gammaproteobacteria	Alteromonadales	Colwelliaceae	Thalassotalea	Thalassotalea_sp.
Taxa_1953	Bacteria	Proteobacteria	Alphaproteobacteria	Sphingomonadales	Sphingomonadaceae	Altererythrobacter	Altererythrobacter_sp.
Taxa_1954	Bacteria	Firmicutes	Bacilli	Bacillales	Bacillaceae	Geobacillus	uncultured_organism
Taxa_1955	Bacteria	Actinobacteriota	Actinobacteria	Actinomycetales	Actinomycetaceae	F0332	uncultured_bacterium
Taxa_1956	Bacteria	Proteobacteria	Gammaproteobacteria	Burkholderiales	Comamonadaceae	Noviherbaspirillum	uncultured_bacterium
Taxa_1957	Bacteria	Proteobacteria	Gammaproteobacteria	Burkholderiales	Methylophilaceae	Methylotenera	Methylophilaceae_bacterium
Taxa_1958	Bacteria	Proteobacteria	Alphaproteobacteria	Rhizobiales	Rhizobiaceae	Aurantimonas	Mesorhizobium_sp.
Taxa_1959	Bacteria	Firmicutes	Bacilli	Paenibacillales	Paenibacillaceae	Paenibacillus	uncultured_bacterium
Taxa_1960	Bacteria	Proteobacteria	Gammaproteobacteria	Burkholderiales	Unknown_Family	Marinicella	uncultured_bacterium
Taxa_1961	Bacteria	Proteobacteria	Gammaproteobacteria	Oceanospirillales	Kangiellaceae	Aliikangiella	uncultured_bacterium
Taxa_1962	Bacteria	Proteobacteria	Gammaproteobacteria	Thiomicrospirales	Thioglobaceae	V38	endosymbiont_of
Taxa_1963	Bacteria	Proteobacteria	Gammaproteobacteria	Salinisphaerales	Algiphilaceae	Algiphilus	uncultured_bacterium
Taxa_1964	Bacteria	Firmicutes	Bacilli	Staphylococcales	Staphylococcaceae	Staphylococcus	Staphylococcus_saprophyticus
Taxa_1966	Bacteria	Bacteroidota	Bacteroidia	Flavobacteriales	Weeksellaceae	Chryseobacterium	Chryseobacterium_sp.
Taxa_1967	Bacteria	Actinobacteriota	Actinobacteria	Corynebacteriales	Nocardiaceae	Rhodococcus	Rhodococcus_aerolatus
Taxa_1968	Bacteria	Firmicutes	Clostridia	Peptostreptococcales-Tissierellales	Peptostreptococcales-Tissierellales	Finegoldia	uncultured_bacterium
Taxa_1969	Bacteria	Verrucomicrobiota	Verrucomicrobiae	Opitutales	Puniceicoccaceae	Lentimonas	uncultured_bacterium
Taxa_1970	Bacteria	Proteobacteria	Alphaproteobacteria	Sphingomonadales	Sphingomonadaceae	Sphingobium	Sphingobium_sp.
Taxa_1971	Bacteria	Actinobacteriota	Acidimicrobiia	Microtrichales	Microtrichaceae	uncultured	uncultured_Acidimicrobiales
Taxa_1972	Bacteria	Proteobacteria	Alphaproteobacteria	Parvibaculales	PS1_clade	PS1_clade	uncultured_PS1
Taxa_1973	Bacteria	Firmicutes	Bacilli	Bacillales	Bacillaceae	Escherichia-Shigella	uncultured_bacterium
Taxa_1974	Bacteria	Proteobacteria	Gammaproteobacteria	Enterobacterales	Flavobacteriaceae	Polaribacter	uncultured_bacterium
Taxa_1975	Bacteria	Bacteroidota	Bacteroidia	Bacteroidales	Tannerellaceae	Tannerella	uncultured_bacterium
Taxa_1976	Bacteria	Proteobacteria	Alphaproteobacteria	Rhizobiales	Beijerinckiaceae	Bosea	uncultured_bacterium
Taxa_1977	Bacteria	Proteobacteria	Gammaproteobacteria	Vibrionales	Vibrionaceae	Enterovibrio	Enterovibrio_sp.
Taxa_1978	Bacteria	Actinobacteriota	Acidimicrobiia	Actinomarinales	Actinomarinaceae	Candidatus_Actinomarina	metagenome
Taxa_1979	Bacteria	Proteobacteria	Alphaproteobacteria	Rhizobiales	Rhizobiales_Incertae_Sedis	Phreatobacter	uncultured_Alphaproteobacteria
Taxa_1980	Bacteria	Cyanobacteria	Cyanobacteriia	Cyanobacteriales	Nostocaceae	Nostoc_PCC-73102	Nostoc_sp.
Taxa_1981	Bacteria	Proteobacteria	Gammaproteobacteria	Desulfuromonadia	Desulfuromonadaceae	Desulfuromonas	uncultured_bacterium
Taxa_1982	Bacteria	Bacteroidota	Bacteroidia	Chitinophagales	Chitinophagaceae	Sediminibacterium	Sediminibacterium_sp.
Taxa_1983	Bacteria	Proteobacteria	Gammaproteobacteria	Vibrionales	Vibrionaceae	uncultured	uncultured_bacterium
Taxa_1984	Bacteria	Proteobacteria	Gammaproteobacteria	Pseudomonadales	Pseudomonadaceae	Pseudomonas	Spumella-like_flagellate
Taxa_1985	Bacteria	Proteobacteria	Gammaproteobacteria	Ectothiorhodospirales	Ectothiorhodospiraceae	uncultured	uncultured_marine
Taxa_1986	Bacteria	Proteobacteria	Gammaproteobacteria	Flavobacteriales	Flavobacteriaceae	uncultured	uncultured_bacterium
Taxa_1987	Bacteria	Firmicutes	Clostridia	Peptostreptococcales-Tissierellales	Fusibacteraceae	Fusibacter	uncultured_bacterium
Taxa_1988	Bacteria	Bacteroidota	Bacteroidia	Flavobacteriales	Weeksellaceae	Empedobacter	uncultured_bacterium
Taxa_1989	Bacteria	Proteobacteria	Gammaproteobacteria	Pseudomonadales	Moraxellaceae	[Agitococcus]_lubricus_group	uncultured_bacterium
Taxa_1990	Bacteria	Firmicutes	Bacilli	Bacillales	Bacillaceae	Bacillus	uncultured_bacterium
Taxa_1991	Bacteria	Proteobacteria	Gammaproteobacteria	Enterobacterales	Yersiniaceae	Yersinia	uncultured_bacterium
Taxa_1992	Bacteria	Proteobacteria	Gammaproteobacteria	Chitinophagales	Thiotrichaceae	uncultured	uncultured_bacterium
Taxa_1993	Bacteria	Proteobacteria	Gammaproteobacteria	Alteromonadales	Psychromonadaceae	Psychromonas	Psychromonas_hadalis
Taxa_1994	Bacteria	Proteobacteria	Gammaproteobacteria	Rhizobiales	Rhodobacteraceae	uncultured	uncultured_bacterium
Taxa_1995	Bacteria	Proteobacteria	Gammaproteobacteria	Oceanospirillales	Alcanivoracaceae1	uncultured	uncultured_Alcanivorax
Taxa_1996	Bacteria	Proteobacteria	Alphaproteobacteria	Caulobacterales	Litoricolaceae	Litoricola	uncultured_bacterium
Taxa_1999	Bacteria	Deinococcota	Deinococci	Thermales	Thermaceae	Thermus	Thermus_thermophilus
Taxa_2000	Bacteria	Bacteroidota	Bacteroidia	Flavobacteriales	Flavobacteriaceae	Spongiivirga	uncultured_bacterium
Taxa_2002	Bacteria	Proteobacteria	Gammaproteobacteria	Burkholderiales	Comamonadaceae	Limnohabitans	uncultured_bacterium
Taxa_2004	Bacteria	Proteobacteria	Gammaproteobacteria	Oceanospirillales	Halomonadaceae	Halomonas	Halomonas_variabilis
Taxa_2006	Bacteria	Firmicutes	Bacilli	Lactobacillales	Streptococcaceae	Streptococcus	Streptococcus_suis
Taxa_2007	Bacteria	Proteobacteria	Gammaproteobacteria	Enterobacterales	Bdellovibrionaceae	OM27_clade	uncultured_delta
Taxa_2010	Bacteria	Campilobacterota	Campylobacteria	Campylobacterales	Arcobacteraceae	Halarcobacter	uncultured_Arcobacter
Taxa_2017	Bacteria	Proteobacteria	Gammaproteobacteria	Alteromonadales	Alteromonadaceae	Ferrimonas	Ferrimonas_marina
Taxa_2018	Bacteria	Proteobacteria	Alphaproteobacteria	Bdellovibrionales	Bdellovibrionaceae	Bdellovibrio	uncultured_bacterium
Taxa_2019	Bacteria	Proteobacteria	Gammaproteobacteria	Thiomicrospirales	Thioglobaceae	V38	uncultured_bacterium
Taxa_2020	Bacteria	Proteobacteria	Alphaproteobacteria	Rhizobiales	Methyloligellaceae	uncultured	uncultured_Rhizobiales
Taxa_2024	Bacteria	Proteobacteria	Gammaproteobacteria	Cellvibrionales	Spongiibacteraceae	Spongiibacter	uncultured_bacterium
Taxa_2025	Bacteria	Proteobacteria	Gammaproteobacteria	Burkholderiales	Neisseriaceae	Conchiformibius	uncultured_bacterium
Taxa_2026	Bacteria	Proteobacteria	Gammaproteobacteria	Alteromonadales	Alteromonadaceae	Paraglaciecola	marine_bacterium
Taxa_2030	Bacteria	Proteobacteria	Gammaproteobacteria	Thiotrichales	Thiotrichaceae	uncultured	uncultured_gamma
Taxa_2032	Bacteria	Firmicutes	Clostridia	Peptostreptococcales-Tissierellales	Peptostreptococcaceae	Filifactor	Filifactor_alocis
Taxa_2038	Bacteria	Myxococcota	Polyangia	Nannocystales	Nannocystaceae	Nannocystis	uncultured_Myxococcales
Taxa_2041	Bacteria	Proteobacteria	Gammaproteobacteria	Francisellales	Francisellaceae	uncultured	uncultured_bacterium
Taxa_2045	Bacteria	Bacteroidota	Bacteroidia	Flavobacteriales	Flavobacteriaceae	Hyunsoonleella	Hyunsoonleella_rubra
Taxa_2046	Bacteria	Proteobacteria	Alphaproteobacteria	Rhizobiales	Rhizobiaceae	Chelativorans	uncultured_Alphaproteobacteria
Taxa_2047	Bacteria	Bdellovibrionota	Bdellovibrionia	Bacteriovoracales	Bacteriovoracaceae	Halobacteriovorax	uncultured_delta
Taxa_2049	Bacteria	Proteobacteria	Alphaproteobacteria	Rhodobacterales	Rhodobacteraceae	Rhodobacteraceae	uncultured_marine
Taxa_2052	Bacteria	Proteobacteria	Gammaproteobacteria	Gammaproteobacteria	Thioprofundaceae	Thioprofundum	uncultured_bacterium
Taxa_2054	Bacteria	Proteobacteria	Gammaproteobacteria	Rhizobiales	Rhizobiaceae	Jiella	uncultured_bacterium
Taxa_2055	Bacteria	Bacteroidota	Bacteroidia	Flavobacteriales	Flavobacteriaceae	Marixanthomonas	Marinirhabdus_gelatinilytica
Taxa_2056	Bacteria	Proteobacteria	Alphaproteobacteria	Caulobacterales	Caulobacteraceae	uncultured	uncultured_Alphaproteobacteria
Taxa_2057	Bacteria	Proteobacteria	Gammaproteobacteria	Oceanospirillales	Oleiphilaceae	Oleiphilus	uncultured_gamma
Taxa_2058	Bacteria	Proteobacteria	Alphaproteobacteria	Rhodobacterales	Rhodobacteraceae	Yoonia-Loktanella	uncultured_marine
Taxa_2059	Bacteria	Proteobacteria	Alphaproteobacteria	Rhodobacterales	Rhodobacteraceae	Ponticoccus	Rhodobacteraceae_bacterium
Taxa_2060	Bacteria	Proteobacteria	Gammaproteobacteria	Vibrionales	Vibrionaceae	Vibrio	Vibrio_orientalis
Taxa_2061	Bacteria	Proteobacteria	Alphaproteobacteria	Sphingomonadales	Sphingomonadaceae	Erythrobacter	Altererythrobacter_atlanticus
Taxa_2062	Bacteria	Proteobacteria	Gammaproteobacteria	Alteromonadales	Shewanellaceae	Shewanella	Shewanella_hanedai
Taxa_2063	Bacteria	Proteobacteria	Gammaproteobacteria	Cellvibrionales	Halieaceae	OM60(NOR5)_clade	uncultured_marine
Taxa_2065	Bacteria	Proteobacteria	Gammaproteobacteria	Sneathiellales	Sneathiellaceae	Sneathiella	uncultured_bacterium
Taxa_2066	Bacteria	Desulfobacterota	Desulfovibrionia	Desulfovibrionales	Desulfovibrionaceae	Desulfovibrio	uncultured_delta
Taxa_2068	Bacteria	Proteobacteria	Gammaproteobacteria	Alteromonadales	Hyphomonadaceae	Hyphomonas	uncultured_bacterium
Taxa_2070	Bacteria	Proteobacteria	Alphaproteobacteria	Rhodospirillales	Thalassospiraceae	Thalassospira	bacterium
Taxa_2073	Bacteria	Proteobacteria	Gammaproteobacteria	Alteromonadales	Alteromonadaceae	UBA10353_marine_group	uncultured_bacterium
Taxa_2074	Bacteria	Proteobacteria	Gammaproteobacteria	Desulfobulbales	Desulfocapsaceae	Desulfocapsa	uncultured_bacterium
Taxa_2075	Bacteria	Proteobacteria	Alphaproteobacteria	Rickettsiales	Rickettsiaceae	Candidatus_Megaira	uncultured_bacterium
Taxa_2078	Bacteria	Proteobacteria	Alphaproteobacteria	Caulobacterales	Caulobacteraceae	Phenylobacterium	uncultured_bacterium
Taxa_2079	Bacteria	Proteobacteria	Alphaproteobacteria	Sneathiellales	Sneathiellaceae	uncultured	uncultured_bacterium
Taxa_2080	Bacteria	Proteobacteria	Gammaproteobacteria	Oceanospirillales	Hyphomonadaceae	uncultured	uncultured_bacterium
Taxa_2081	Bacteria	Proteobacteria	Alphaproteobacteria	Rhizobiales	Rhizobiaceae	Jiella	uncultured_bacterium
Taxa_2083	Bacteria	Proteobacteria	Gammaproteobacteria	Oceanospirillales	AT-s3-44	AT-s3-44	uncultured_bacterium
Taxa_2086	Bacteria	Proteobacteria	Alphaproteobacteria	Rhizobiales	Rhizobiaceae	Allorhizobium-Neorhizobium-Pararhizobium-Rhizobium	Rhizobium_mongolense
Taxa_2094	Bacteria	Proteobacteria	Alphaproteobacteria	Caulobacterales	Hyphomonadaceae	Hyphomonas	Hyphomonas_beringensis
Taxa_2095	Bacteria	Proteobacteria	Gammaproteobacteria	Pseudomonadales	Pseudomonadaceae	Alcanivorax	uncultured_bacterium
Taxa_2096	Bacteria	Campilobacterota	Campylobacteria	Campylobacterales	Arcobacteraceae	uncultured	Arcobacter_sp.
Taxa_2097	Bacteria	Proteobacteria	Gammaproteobacteria	Oceanospirillales	Thiotrichaceae	UBA10353_marine_group	uncultured_bacterium
Taxa_2099	Bacteria	Desulfobacterota	Desulfobulbia	Desulfobulbales	Desulfocapsaceae	Desulfocapsa	uncultured_bacterium
Taxa_2100	Bacteria	Proteobacteria	Alphaproteobacteria	Rhodospirillales	Thalassospiraceae	Thalassospira	Nitrosomonas_europaea
Taxa_2102	Bacteria	Proteobacteria	Gammaproteobacteria	Rhodobacterales	Rhodobacteraceae	Rhodobacter	Rhodobacter_sp.
Taxa_2103	Bacteria	Proteobacteria	Gammaproteobacteria	Thiotrichales	Thiotrichaceae	Thiothrix	Thiolinea_disciformis
Taxa_2104	Bacteria	Proteobacteria	Gammaproteobacteria	Enterobacterales	Enterobacteriaceae	Serratia	uncultured_bacterium
Taxa_2105	Bacteria	Proteobacteria	Alphaproteobacteria	Thalassobaculales	Nisaeaceae	Nisaea	uncultured_Alphaproteobacteria
Taxa_2108	Bacteria	Proteobacteria	Gammaproteobacteria	Enterobacterales	Enterobacteriaceae	Enterobacter	uncultured_bacterium
Taxa_2109	Bacteria	Proteobacteria	Alphaproteobacteria	Rhodobacterales	Rhodobacteraceae	Roseobacter_clade_CHAB-I-5_lineage	uncultured_bacterium
Taxa_2116	Bacteria	Bdellovibrionota	Bdellovibrionia	Bacteriovoracales	Bacteriovoracaceae	uncultured	Bacteriovorax_sp.
Taxa_2117	Bacteria	Proteobacteria	Gammaproteobacteria	Legionellales	Legionellaceae	Legionella	uncultured_organism
Taxa_2118	Bacteria	Proteobacteria	Gammaproteobacteria	Rhodobacterales	Rhodobacteraceae	Vibrio	uncultured_bacterium
Taxa_2120	Bacteria	Actinobacteriota	Actinobacteria	Micrococcales	Dermacoccaceae	Kytococcus	Kytococcus_sedentarius
Taxa_2124	Bacteria	Proteobacteria	Alphaproteobacteria	Rhodobacterales	Rhodobacteraceae	Seohaeicola	uncultured_bacterium
Taxa_2125	Bacteria	Proteobacteria	Alphaproteobacteria	Sphingomonadales	Sphingomonadaceae	Altererythrobacter	alpha_proteobacterium
Taxa_2128	Bacteria	Proteobacteria	Gammaproteobacteria	Vibrionales	Vibrionaceae	Vibrio	uncultured_marine
Taxa_2132	Bacteria	Proteobacteria	Gammaproteobacteria	Legionellales	Legionellaceae	uncultured	uncultured_gamma
Taxa_2133	Bacteria	Proteobacteria	Alphaproteobacteria	Sneathiellales	Sneathiellaceae	Sneathiella	uncultured_marine
Taxa_2134	Bacteria	Proteobacteria	Alphaproteobacteria	Rhodobacterales	Rhodobacteraceae	Pseudomonas	uncultured_bacterium
Taxa_2138	Bacteria	Proteobacteria	Alphaproteobacteria	Rhodobacterales	Rhodobacteraceae	Roseobacter	Roseobacter_denitrificans
Taxa_2140	Bacteria	Proteobacteria	Alphaproteobacteria	Rhodobacterales	Rhodobacteraceae	Falsirhodobacter	Falsirhodobacter_sp.
Taxa_2142	Bacteria	Proteobacteria	Alphaproteobacteria	Rhizobiales	Rhodobacteraceae	Filomicrobium	uncultured_bacterium
Taxa_2143	Bacteria	Proteobacteria	Alphaproteobacteria	Parvibaculales	OCS116_clade	OCS116_clade	uncultured_marine
Taxa_2145	Bacteria	Proteobacteria	Alphaproteobacteria	Rhodobacterales	Rhodobacteraceae	Nereida	uncultured_Alphaproteobacteria
Taxa_2146	Bacteria	Proteobacteria	Gammaproteobacteria	Oceanospirillales	Saccharospirillaceae	uncultured	uncultured_Oceanospirillaceae
Taxa_2147	Bacteria	Proteobacteria	Alphaproteobacteria	Rhodobacterales	Rhodobacteraceae	Limimaricola	uncultured_bacterium
Taxa_2148	Bacteria	Proteobacteria	Alphaproteobacteria	Rhodobacterales	Rhodobacteraceae	Octadecabacter	uncultured_bacterium
Taxa_2149	Bacteria	Proteobacteria	Gammaproteobacteria	Burkholderiales	Comamonadaceae	Variovorax	Variovorax_paradoxus
Taxa_2150	Bacteria	Proteobacteria	Gammaproteobacteria	Oceanospirillales	Saccharospirillaceae	Saccharospirillum	uncultured_bacterium
Taxa_2152	Bacteria	Bacteroidota	Bacteroidia	Flavobacteriales	Cryomorphaceae	uncultured	uncultured_Flavobacterium
Taxa_2153	Bacteria	Proteobacteria	Gammaproteobacteria	Oceanospirillales	Marinomonadaceae	Marinomonas	Oceanospirillum_vagum
Taxa_2155	Bacteria	Synergistota	Synergistia	Synergistales	Synergistaceae	Syner-01	uncultured_bacterium
Taxa_2160	Bacteria	Desulfobacterota	Desulfobulbia	Desulfobulbales	Desulfocapsaceae	Desulfofustis	uncultured_bacterium
Taxa_2161	Bacteria	Proteobacteria	Gammaproteobacteria	Burkholderiales	Oxalobacteraceae	uncultured	uncultured_bacterium
Taxa_2166	Bacteria	Desulfobacterota	Desulfobacteria	Desulfobacterales	Desulfobacteraceae	Desulfobacter	Desulfobacter_vibrioformis
Taxa_2167	Bacteria	Proteobacteria	Gammaproteobacteria	Burkholderiales	Oxalobacteraceae	Undibacterium	uncultured_bacterium
Taxa_2168	Bacteria	Proteobacteria	Gammaproteobacteria	Burkholderiales	Alcaligenaceae	Pseudorhodobacter	uncultured_bacterium
Taxa_2173	Bacteria	Deinococcota	Deinococci	Thermales	Thermaceae	Meiothermus	Meiothermus_silvanus
Taxa_2174	Bacteria	Proteobacteria	Gammaproteobacteria	Oceanospirillales	Halomonadaceae	Halomonas	uncultured_gamma
Taxa_2178	Bacteria	Bacteroidota	Bacteroidia	Flavobacteriales	Flavobacteriaceae	Leeuwenhoekiella	Leeuwenhoekiella_nanhaiensis
Taxa_2179	Bacteria	Proteobacteria	Gammaproteobacteria	Enterobacterales	Enterobacteriaceae	Salmonella	Salmonella_enterica
Taxa_2180	Bacteria	Proteobacteria	Gammaproteobacteria	Alteromonadales	Alteromonadaceae	Glaciecola	uncultured_Arctic
Taxa_2181	Bacteria	Proteobacteria	Gammaproteobacteria	Oceanospirillales	Alcanivoracaceae1	Alcanivorax	Nitrosomonas_europaea
Taxa_2182	Bacteria	Proteobacteria	Gammaproteobacteria	Oceanospirillales	Saccharospirillaceae	Oceaniserpentilla	Oceaniserpentilla_haliotis
Taxa_2183	Bacteria	Proteobacteria	Gammaproteobacteria	Enterobacterales	Enterobacteriaceae	Sodalis	endosymbiont_of
Taxa_2189	Bacteria	Proteobacteria	Gammaproteobacteria	Cellvibrionales	Halieaceae	uncultured	uncultured_bacterium
Taxa_2190	Bacteria	Cyanobacteria	Vampirivibrionia	Obscuribacterales	Obscuribacteraceae	Obscuribacteraceae	uncultured_bacterium
Taxa_2192	Bacteria	Proteobacteria	Gammaproteobacteria	Alteromonadales	Shewanellaceae	Ferrimonas	Ferrimonas_marina
Taxa_2193	Bacteria	Proteobacteria	Alphaproteobacteria	Rhizobiales	Beijerinckiaceae	Kaistia	uncultured_bacterium
Taxa_2195	Bacteria	Proteobacteria	Gammaproteobacteria	Enterobacterales	Enterobacteriaceae	Cronobacter	Cronobacter_sakazakii
Taxa_2196	Bacteria	Proteobacteria	Gammaproteobacteria	Rhodospirillales	Magnetospirillaceae	uncultured	alpha_proteobacterium
Taxa_2198	Bacteria	Proteobacteria	Gammaproteobacteria	Alteromonadales	Sphingomonadaceae	Sphingomonas	uncultured_bacterium
Taxa_2200	Bacteria	Proteobacteria	Alphaproteobacteria	Rhizobiales	uncultured	uncultured	uncultured_Rhizobiales
Taxa_2203	Bacteria	Proteobacteria	Gammaproteobacteria	Acidiferrobacterales	Acidiferrobacteraceae	Sulfurifustis	uncultured_bacterium
Taxa_2204	Bacteria	Proteobacteria	Gammaproteobacteria	Alteromonadales	Psychromonadaceae	Psychromonas	Psychromonas_sp.
Taxa_2205	Bacteria	Proteobacteria	Alphaproteobacteria	Caulobacterales	Hyphomonadaceae	Robiginitomaculum	uncultured_bacterium
Taxa_2206	Bacteria	Proteobacteria	Gammaproteobacteria	Chromatiales	Chromatiaceae	Candidatus_Thiobios	uncultured_gamma
Taxa_2207	Bacteria	Proteobacteria	Alphaproteobacteria	Rhodobacterales	Rhodobacteraceae	Octadecabacter	Octadecabacter_temperatus
Taxa_2208	Bacteria	Proteobacteria	Alphaproteobacteria	uncultured	uncultured	uncultured	uncultured_Alphaproteobacteria
Taxa_2209	Bacteria	Bacteroidota	Bacteroidia	Cytophagales	Cyclobacteriaceae	Fulvivirga	uncultured_bacterium
Taxa_2210	Bacteria	Proteobacteria	Gammaproteobacteria	Granulosicoccales	uncultured	uncultured	uncultured_bacterium
Taxa_2211	Bacteria	Proteobacteria	Gammaproteobacteria	Chromatiales	Sedimenticolaceae	uncultured	uncultured_sediment
Taxa_2212	Bacteria	Bdellovibrionota	Oligoflexia	0319-6G20	0319-6G20	0319-6G20	uncultured_bacterium
Taxa_2213	Bacteria	Proteobacteria	Gammaproteobacteria	Gammaproteobacteria_Incertae_Sedis	Unknown_Family	Candidatus_Berkiella	uncultured_bacterium
Taxa_2214	Bacteria	Planctomycetota	Planctomycetes	Planctomycetales	Gimesiaceae	uncultured	uncultured_planctomycete
Taxa_2215	Bacteria	Planctomycetota	Planctomycetes	Pirellulales	Pirellulaceae	Pir4_lineage	uncultured_bacterium
Taxa_2217	Bacteria	Proteobacteria	Alphaproteobacteria	Rhodobacterales	Rhodobacteraceae	Leisingera	Leisingera_aquaemixtae
Taxa_2218	Bacteria	Bacteroidota	Bacteroidia	Flavobacteriales	Flavobacteriaceae	Psychroserpens	Psychroserpens_sp.
Taxa_2219	Bacteria	Planctomycetota	028H05-P-BN-P5	028H05-P-BN-P5	028H05-P-BN-P5	028H05-P-BN-P5	uncultured_bacterium
Taxa_2220	Bacteria	Proteobacteria	Alphaproteobacteria	Rhizobiales	Devosiaceae	uncultured	uncultured_bacterium
Taxa_2221	Bacteria	Bdellovibrionota	Bdellovibrionia	Bacteriovoracales	Bacteriovoracaceae	uncultured	uncultured_bacterium
Taxa_2222	Bacteria	Proteobacteria	Alphaproteobacteria	Tistrellales	Geminicoccaceae	uncultured	uncultured_Alphaproteobacteria
Taxa_2223	Bacteria	Cyanobacteria	Cyanobacteriia	Cyanobacteriales	Xenococcaceae	Pleurocapsa_PCC-7319	Chroococcidiopsis_sp.
Taxa_2224	Bacteria	Proteobacteria	Alphaproteobacteria	Rhizobiales	Hyphomicrobiaceae	Filomicrobium	uncultured_bacterium
Taxa_2225	Bacteria	Bacteroidota	Bacteroidia	Flavobacteriales	Flavobacteriaceae	Postechiella	uncultured_bacterium
Taxa_2226	Bacteria	Proteobacteria	Alphaproteobacteria	Rhizobiales	Stappiaceae	Stappia	uncultured_bacterium
Taxa_2227	Bacteria	Proteobacteria	Gammaproteobacteria	Steroidobacterales	Woeseiaceae	Woeseia	uncultured_gamma
Taxa_2228	Bacteria	Desulfobacterota	Desulfobulbia	Desulfobulbales	Desulfocapsaceae	[Desulfobacterium]_catecholicum_group	uncultured_bacterium
Taxa_2229	Bacteria	Proteobacteria	Gammaproteobacteria	Granulosicoccales	Granulosicoccaceae	Granulosicoccus	Granulosicoccus_undariae
Taxa_2230	Bacteria	Proteobacteria	Gammaproteobacteria	Steroidobacterales	Woeseiaceae	uncultured	uncultured_bacterium
Taxa_2231	Bacteria	Bacteroidota	Bacteroidia	Chitinophagales	Chitinophagaceae	Edaphobaculum	uncultured_bacterium
Taxa_2232	Bacteria	Cyanobacteria	Cyanobacteriia	Cyanobacteriales	Xenococcaceae	Pleurocapsa_PCC-7319	Stanieria_sp.
Taxa_2233	Bacteria	Proteobacteria	Alphaproteobacteria	Rhizobiales	Stappiaceae	Cohaesibacter	uncultured_bacterium
Taxa_2234	Bacteria	Cyanobacteria	Cyanobacteriia	Phormidesmiales	Phormidesmiaceae	Phormidesmis_ANT.LACV5.1	uncultured_bacterium
Taxa_2235	Bacteria	Planctomycetota	Planctomycetes	Planctomycetales	Gimesiaceae	Gimesia	uncultured_Planctomyces
Taxa_2236	Bacteria	Bdellovibrionota	Bdellovibrionia	Bdellovibrionales	Bdellovibrionaceae	Bdellovibrio	uncultured_Bdellovibrio
Taxa_2237	Bacteria	Proteobacteria	Alphaproteobacteria	Rhodobacterales	Rhodobacteraceae	Ruegeria	Epibacterium_mobile
Taxa_2238	Bacteria	Cyanobacteria	Cyanobacteriia	Cyanobacteriales	Xenococcaceae	Xenococcus_PCC-7305	uncultured_bacterium
Taxa_2239	Bacteria	Proteobacteria	Alphaproteobacteria	Caulobacterales	Hyphomonadaceae	Litorimonas	uncultured_marine
Taxa_2240	Bacteria	Bacteroidota	Bacteroidia	Flavobacteriales	Flavobacteriaceae	Kordia	Kordia_algicida
Taxa_2241	Bacteria	Bacteroidota	Bacteroidia	Chitinophagales	Saprospiraceae	Aureispira	uncultured_Bacteroidetes
Taxa_2242	Bacteria	Bacteroidota	Bacteroidia	Flavobacteriales	Flavobacteriaceae	Wenyingzhuangia	Flavobacteriaceae_bacterium
Taxa_2244	Bacteria	Proteobacteria	Gammaproteobacteria	HOC36	HOC36	uncultured	uncultured_bacterium
Taxa_2245	Bacteria	Proteobacteria	Gammaproteobacteria	Cellvibrionales	Spongiibacteraceae	BD1-7_clade	BD1-7_clade
Taxa_2246	Bacteria	Proteobacteria	Alphaproteobacteria	Rhodobacterales	Rhodobacteraceae	Pseudorhodobacter	Pseudorhodobacter_ferrugineus
Taxa_2247	Bacteria	Proteobacteria	Alphaproteobacteria	Caulobacterales	Hyphomonadaceae	Hellea	uncultured_Alphaproteobacteria
Taxa_2248	Bacteria	Proteobacteria	Alphaproteobacteria	Caulobacterales	Hyphomonadaceae	Litorimonas	uncultured_Alphaproteobacteria
Taxa_2249	Bacteria	Proteobacteria	Gammaproteobacteria	Diplorickettsiales	Diplorickettsiaceae	Aquicella	uncultured_bacterium
Taxa_2250	Bacteria	Proteobacteria	Gammaproteobacteria	Thiomicrospirales	Thioglobaceae	SUP05_cluster	uncultured_gamma
Taxa_2251	Bacteria	Proteobacteria	Gammaproteobacteria	TX1A-33	TX1A-33	uncultured	uncultured_bacterium
Taxa_2252	Bacteria	Proteobacteria	Alphaproteobacteria	Rhizobiales	Rhizobiaceae	Pseudahrensia	uncultured_bacterium
Taxa_2253	Bacteria	Myxococcota	Polyangia	Polyangiales	Sandaracinaceae	uncultured	uncultured_bacterium
Taxa_2254	Bacteria	Planctomycetota	Planctomycetes	Planctomycetales	uncultured	uncultured	uncultured_bacterium
Taxa_2255	Bacteria	Bacteroidota	Bacteroidia	Flavobacteriales	Flavobacteriaceae	Flavobacteriaceae	Algibacter_sp.
Taxa_2256	Bacteria	Actinobacteriota	Acidimicrobiia	Microtrichales	Microtrichaceae	IMCC26207	uncultured_bacterium
Taxa_2257	Bacteria	Planctomycetota	Planctomycetes	Planctomycetales	Rubinisphaeraceae	Planctomicrobium	uncultured_bacterium
Taxa_2258	Bacteria	Bacteroidota	Bacteroidia	Flavobacteriales	Flavobacteriaceae	Maribacter	Pibocella_ponti
Taxa_2259	Bacteria	Bacteroidota	Bacteroidia	Flavobacteriales	Flavobacteriaceae	uncultured	Flavobacteriaceae_bacterium
Taxa_2260	Bacteria	Proteobacteria	Gammaproteobacteria	Thiotrichales	Thiotrichaceae	Leucothrix	uncultured_gamma
Taxa_2261	Bacteria	Proteobacteria	Alphaproteobacteria	Sphingomonadales	Sphingomonadaceae	Sphingomicrobium	Sphingomicrobium_marinum
Taxa_2262	Bacteria	Proteobacteria	Gammaproteobacteria	Legionellales	Legionellaceae	Legionella	uncultured_Legionellales
Taxa_2263	Bacteria	Proteobacteria	Alphaproteobacteria	Rhizobiales	PS1_clade	uncultured	uncultured_bacterium
Taxa_2264	Bacteria	Proteobacteria	Gammaproteobacteria	Granulosicoccales	Granulosicoccaceae	Granulosicoccus	uncultured_gamma
Taxa_2266	Bacteria	Bacteroidota	Bacteroidia	Chitinophagales	Saprospiraceae	Aureispira	Saprospira_sp.
Taxa_2267	Bacteria	Proteobacteria	Gammaproteobacteria	SS1-B-09-64	SS1-B-09-64	uncultured	uncultured_bacterium
Taxa_2268	Bacteria	Proteobacteria	Alphaproteobacteria	Bdellovibrionales	Bdellovibrionaceae	OM27_clade	uncultured_bacterium
Taxa_2269	Bacteria	Proteobacteria	Gammaproteobacteria	Chromatiales	Chromatiaceae	Thiohalocapsa	uncultured_bacterium
Taxa_2271	Bacteria	Proteobacteria	Gammaproteobacteria	B2M28	B2M28	B2M28	uncultured_Coxiella
Taxa_2273	Bacteria	Proteobacteria	Gammaproteobacteria	Ectothiorhodospirales	Thioalkalispiraceae	Thiohalophilus	uncultured_bacterium
Taxa_2274	Bacteria	Proteobacteria	Gammaproteobacteria	Alteromonadales	Alteromonadaceae	Paraglaciecola	Paraglaciecola_psychrophila
Taxa_2277	Bacteria	Desulfobacterota	Desulfobacteria	Desulfatiglandales	Desulfatiglandaceae	Desulfatiglans	uncultured_bacterium
Taxa_2286	Bacteria	Proteobacteria	Gammaproteobacteria	Ectothiorhodospirales	Ectothiorhodospiraceae	Thioalkalivibrio	Thioalkalivibrio_thiocyanoxidans
Taxa_2289	Bacteria	Proteobacteria	Alphaproteobacteria	Rhizobiales	Thermopetrobacteraceae	Thermopetrobacter	uncultured_bacterium
Taxa_2291	Bacteria	Bacteroidota	Bacteroidia	Flavobacteriales	Flavobacteriaceae	Cellulophaga	uncultured_bacterium
Taxa_2293	Bacteria	Proteobacteria	Alphaproteobacteria	Azospirillales	Azospirillaceae	uncultured	uncultured_bacterium
Taxa_2299	Bacteria	Proteobacteria	Alphaproteobacteria	Rhizobiales	Stappiaceae	Labrenzia	uncultured_bacterium
Taxa_2303	Bacteria	Proteobacteria	Alphaproteobacteria	Rickettsiales	SM2D12	uncultured	metagenome
Taxa_2306	Bacteria	Proteobacteria	Gammaproteobacteria	Alteromonadales	Yersiniaceae	Serratia	uncultured_bacterium
Taxa_2308	Bacteria	Bdellovibrionota	Bdellovibrionia	Bacteriovoracales	Bacteriovoracaceae	uncultured	uncultured_organism
Taxa_2313	Bacteria	Proteobacteria	Gammaproteobacteria	Methylococcales	Methylomonadaceae	Methyloprofundus	uncultured_gamma
Taxa_2314	Bacteria	Proteobacteria	Gammaproteobacteria	Tenderiales	Tenderiaceae	Candidatus_Tenderia	uncultured_gamma
Taxa_2317	Bacteria	Proteobacteria	Gammaproteobacteria	Vibrionales	Vibrionaceae	MB19	uncultured_bacterium
Taxa_2321	Bacteria	Bacteroidota	Rhodothermia	Balneolales	Balneolaceae	Balneola	uncultured_Balneola
Taxa_2323	Bacteria	Bacteroidota	Bacteroidia	Chitinophagales	Saprospiraceae	Portibacter	uncultured_bacterium
Taxa_2324	Bacteria	Proteobacteria	Gammaproteobacteria	Xanthomonadales	Rhodanobacteraceae	Aquimonas	uncultured_bacterium
Taxa_2328	Bacteria	Desulfobacterota	Desulfovibrionia	Desulfovibrionales	Desulfovibrionaceae	uncultured	uncultured_bacterium
Taxa_2329	Bacteria	Proteobacteria	Gammaproteobacteria	Cellvibrionales	Spongiibacteraceae	BD1-7_clade	uncultured_gamma
Taxa_2330	Bacteria	Proteobacteria	Alphaproteobacteria	Rhizobiales	Beijerinckiaceae	Methylobacterium-Methylorubrum	Methylobacterium_radiotolerans
Taxa_2331	Bacteria	Proteobacteria	Gammaproteobacteria	Oceanospirillales	Hyphomonadaceae	Hyphomonas	uncultured_bacterium
Taxa_2333	Bacteria	Proteobacteria	Gammaproteobacteria	Enterobacterales	Yersiniaceae	Serratia	Serratia_nematodiphila
Taxa_2335	Bacteria	Proteobacteria	Alphaproteobacteria	Sphingomonadales	Sphingomonadaceae	Altererythrobacter	Sphingomonas_sp.
Taxa_2336	Bacteria	Planctomycetota	Phycisphaerae	Phycisphaerales	Phycisphaeraceae	CL500-3	uncultured_bacterium
Taxa_2345	Bacteria	Firmicutes	Clostridia	Christensenellales	Christensenellaceae	Christensenellaceae_R-7_group	uncultured_bacterium
Taxa_2346	Bacteria	Actinobacteriota	Actinobacteria	Micrococcales	Micrococcaceae	Kocuria	Kocuria_sp.
Taxa_2347	Bacteria	Proteobacteria	Gammaproteobacteria	Pseudomonadales	Moraxellaceae	Psychrobacter	Psychrobacter_alimentarius
Taxa_2348	Bacteria	Proteobacteria	Alphaproteobacteria	Thalassobaculales	Nisaeaceae	OM75_clade	uncultured_Alphaproteobacteria
Taxa_2349	Bacteria	Proteobacteria	Gammaproteobacteria	Burkholderiales	Oxalobacteraceae	Limnobacter	uncultured_bacterium
Taxa_2350	Bacteria	Proteobacteria	Alphaproteobacteria	Caulobacterales	Hyphomonadaceae	Hirschia	uncultured_bacterium
Taxa_2352	Bacteria	Proteobacteria	Gammaproteobacteria	Burkholderiales	Comamonadaceae	Alicycliphilus	uncultured_Alicycliphilus
Taxa_2353	Bacteria	Bacteroidota	Bacteroidia	Flavobacteriales	Flavobacteriaceae	uncultured	Tenacibaculum_todarodis
Taxa_2354	Bacteria	Proteobacteria	Gammaproteobacteria	Burkholderiales	Rhodocyclaceae	Azoarcus	Azoarcus_sp.
Taxa_2357	Bacteria	Firmicutes	Clostridia	Lachnospirales	Lachnospiraceae	Fusicatenibacter	uncultured_bacterium
Taxa_2359	Bacteria	Bacteroidota	Bacteroidia	Flavobacteriales	Flavobacteriaceae	Ulvibacter	uncultured_bacterium
Taxa_2360	Bacteria	Proteobacteria	Alphaproteobacteria	Rickettsiales	Rickettsiaceae	uncultured	uncultured_organism
Taxa_2362	Bacteria	Proteobacteria	Alphaproteobacteria	Sphingomonadales	Sphingomonadaceae	Erythrobacter	Erythrobacter_marinus
Taxa_2365	Bacteria	Proteobacteria	Gammaproteobacteria	Ectothiorhodospirales	Thioalkalispiraceae	Thiohalophilus	uncultured_gamma
Taxa_2371	Bacteria	Bacteroidota	Bacteroidia	Flavobacteriales	Flavobacteriaceae	Colwellia	uncultured_bacterium
Taxa_2372	Bacteria	Proteobacteria	Gammaproteobacteria	Ga0077536	Ga0077536	Ga0077536	uncultured_bacterium
Taxa_2373	Bacteria	Deinococcota	Deinococci	Thermales	Thermaceae	Thermus	uncultured_bacterium
Taxa_2374	Bacteria	Proteobacteria	Gammaproteobacteria	Burkholderiales	Comamonadaceae	Pelomonas	uncultured_bacterium
Taxa_2375	Bacteria	Firmicutes	Bacilli	Lactobacillales	Lactobacillaceae	Lactobacillus	Lactobacillus_nagelii
Taxa_2376	Bacteria	Proteobacteria	Alphaproteobacteria	Rhizobiales	Xanthobacteraceae	Rhodopseudomonas	Rhodopseudomonas_pseudopalustris
Taxa_2377	Bacteria	Actinobacteriota	Actinobacteria	Frankiales	Nakamurellaceae	Nakamurella	Nakamurella_sp.
Taxa_2380	Bacteria	Proteobacteria	Alphaproteobacteria	Sphingomonadales	Sphingomonadaceae	Novosphingobium	Novosphingobium_fluoreni
Taxa_2381	Bacteria	Planctomycetota	Planctomycetes	Pirellulales	Pirellulaceae	uncultured	uncultured_planctomycete
Taxa_2393	Bacteria	Myxococcota	Polyangia	Polyangiales	Polyangiaceae	Pajaroellobacter	uncultured_bacterium
Taxa_2394	Bacteria	Proteobacteria	Gammaproteobacteria	Cellvibrionales	Halieaceae	Haliea	uncultured_bacterium
Taxa_2395	Bacteria	Proteobacteria	Gammaproteobacteria	pItb-vmat-80	pItb-vmat-80	uncultured	uncultured_bacterium
Taxa_2396	Bacteria	Proteobacteria	Gammaproteobacteria	uncultured	uncultured	uncultured	uncultured_organism
Taxa_2397	Bacteria	Proteobacteria	Gammaproteobacteria	Bdellovibrionales	Bdellovibrionaceae	OM27_clade	uncultured_delta
Taxa_2398	Bacteria	Proteobacteria	Gammaproteobacteria	Arenicellales	Arenicellaceae	Alcanivorax	uncultured_bacterium
Taxa_2405	Bacteria	Proteobacteria	Alphaproteobacteria	NRL2	NRL2	NRL2	uncultured_Alphaproteobacteria
Taxa_2408	Bacteria	Proteobacteria	Alphaproteobacteria	Rhizobiales	Methyloligellaceae	uncultured	uncultured_Alphaproteobacteria
Taxa_2419	Bacteria	Proteobacteria	Alphaproteobacteria	Rhodobacterales	Rhodobacteraceae	Kordiimonas	uncultured_bacterium
Taxa_2422	Bacteria	Proteobacteria	Alphaproteobacteria	Rhodospirillales	Thalassospiraceae	Thalassospira	Rhodospirillaceae_bacterium
Taxa_2424	Bacteria	Bacteroidota	Bacteroidia	Cytophagales	Hymenobacteraceae	Pontibacter	uncultured_bacterium
Taxa_2428	Bacteria	Proteobacteria	Alphaproteobacteria	Rhodobacterales	Rhodobacteraceae	Ruegeria	Rhodovulum_marinum
Taxa_2430	Bacteria	Proteobacteria	Gammaproteobacteria	Sphingomonadales	Sphingomonadaceae	Sphingopyxis	uncultured_Sphingopyxis
Taxa_2431	Bacteria	Acidobacteriota	Blastocatellia	Blastocatellales	Blastocatellaceae	Blastocatella	uncultured_Acidobacteria
Taxa_2435	Bacteria	Proteobacteria	Gammaproteobacteria	Oceanospirillales	Halomonadaceae	Halomonas	uncultured_organism
Taxa_2436	Bacteria	Proteobacteria	Alphaproteobacteria	Oceanospirillales	Alcanivoracaceae1	uncultured	uncultured_bacterium
Taxa_2438	Bacteria	Proteobacteria	Alphaproteobacteria	Caulobacterales	Hyphomonadaceae	Hirschia	Hirschia_baltica
Taxa_2440	Bacteria	Proteobacteria	Alphaproteobacteria	Rhodobacterales	Rhodobacteraceae	Aliiroseovarius	uncultured_Alphaproteobacteria
Taxa_2442	Bacteria	Proteobacteria	Alphaproteobacteria	Rhizobiales	Hyphomicrobiaceae	Hyphomicrobium	uncultured_bacterium
Taxa_2443	Bacteria	Proteobacteria	Alphaproteobacteria	Sneathiellales	Sneathiellaceae	Sneathiella	Sneathiella_sp.
Taxa_2445	Bacteria	Proteobacteria	Gammaproteobacteria	Pseudomonadales	Pseudomonadaceae	Pseudomonas	Pseudomonas_xinjiangensis
Taxa_2450	Bacteria	Proteobacteria	Gammaproteobacteria	Caulobacterales	Parvularculaceae	uncultured	uncultured_bacterium
Taxa_2452	Bacteria	Proteobacteria	Gammaproteobacteria	Rhodobacterales	Rhodobacteraceae	Rhodobacter	uncultured_bacterium
Taxa_2453	Bacteria	Proteobacteria	Gammaproteobacteria	Immundisolibacterales	Immundisolibacteraceae	uncultured	uncultured_gamma
Taxa_2454	Bacteria	Proteobacteria	Gammaproteobacteria	Gammaproteobacteria_Incertae_Sedis	Unknown_Family	Marinicella	uncultured_bacterium
Taxa_2457	Bacteria	Proteobacteria	Gammaproteobacteria	Alteromonadales	Idiomarinaceae	Idiomarina	uncultured_marine
Taxa_2459	Bacteria	Proteobacteria	Alphaproteobacteria	Bacteriovoracales	Bacteriovoracaceae	uncultured	uncultured_bacterium
Taxa_2461	Bacteria	Proteobacteria	Alphaproteobacteria	Rhodobacterales	Rhodobacteraceae	Lentilitoribacter	uncultured_bacterium
Taxa_2462	Bacteria	Bdellovibrionota	Bdellovibrionia	Bacteriovoracales	Bacteriovoracaceae	Peredibacter	uncultured_bacterium
Taxa_2469	Bacteria	Proteobacteria	Gammaproteobacteria	Aeromonadales	Aeromonadaceae	Oceanimonas	uncultured_bacterium
Taxa_2470	Bacteria	Proteobacteria	Alphaproteobacteria	Rhodobacterales	Rhodobacteraceae	Roseobacter_clade_CHAB-I-5_lineage	Pseudoruegeria_sp.
Taxa_2472	Bacteria	Proteobacteria	Gammaproteobacteria	Enterobacterales	Thiotrichaceae	uncultured	uncultured_bacterium
Taxa_2478	Bacteria	Proteobacteria	Gammaproteobacteria	Thiotrichales	Thiotrichaceae	uncultured	uncultured_marine
Taxa_2482	Bacteria	Firmicutes	Clostridia	Eubacteriales	Eubacteriaceae	Acetobacterium	uncultured_bacterium
Taxa_2483	Bacteria	Proteobacteria	Alphaproteobacteria	Rhodobacterales	Rhodobacteraceae	Gemmobacter	Tabrizicola_sp.
Taxa_2484	Bacteria	Proteobacteria	Gammaproteobacteria	Immundisolibacterales	Immundisolibacteraceae	Proteobacteria	uncultured_bacterium
Taxa_2485	Bacteria	Proteobacteria	Gammaproteobacteria	Rhodobacterales	Rhodobacteraceae	Psychromonas	uncultured_bacterium
Taxa_2486	Bacteria	Proteobacteria	Gammaproteobacteria	Cellvibrionales	Cellvibrionaceae	Cellvibrionaceae	uncultured_gamma
Taxa_2487	Bacteria	Proteobacteria	Gammaproteobacteria	Rhodobacterales	Rhodobacteraceae	Thalassotalea	uncultured_bacterium
Taxa_2488	Bacteria	Proteobacteria	Gammaproteobacteria	Alteromonadales	Halomonadaceae	Microbulbifer	uncultured_bacterium
Taxa_2491	Bacteria	Actinobacteriota	Coriobacteriia	OPB41	OPB41	OPB41	uncultured_bacterium
Taxa_2493	Bacteria	Proteobacteria	Alphaproteobacteria	Sphingomonadales	Sphingomonadaceae	Sphingopyxis	Sphingopyxis_baekryungensis
Taxa_2496	Bacteria	Proteobacteria	Gammaproteobacteria	D90	D90	D90	uncultured_bacterium
Taxa_2497	Bacteria	Proteobacteria	Alphaproteobacteria	Rhodobacterales	Rhodobacteraceae	uncultured	Loktanella_sp.
Taxa_2499	Bacteria	Proteobacteria	Alphaproteobacteria	Caulobacterales	Hyphomonadaceae	Alteromonas	uncultured_bacterium
Taxa_2501	Bacteria	Proteobacteria	Gammaproteobacteria	Pseudomonadales	Pseudomonadaceae	Pseudomonas	Pseudomonas_mohnii
Taxa_2503	Bacteria	Proteobacteria	Alphaproteobacteria	Rhizobiales	Rhizobiaceae	Leucothrix	uncultured_bacterium
Taxa_2505	Bacteria	Proteobacteria	Alphaproteobacteria	Rhodobacterales	Rhodobacteraceae	Roseovarius	bacterium_RFB
Taxa_2510	Bacteria	Bacteroidota	Bacteroidia	Flavobacteriales	Flavobacteriaceae	NS3a_marine_group	uncultured_marine
Taxa_2514	Bacteria	Proteobacteria	Alphaproteobacteria	Rhodobacterales	Rhodobacteraceae	Sulfitobacter	Sulfitobacter_brevis
Taxa_2515	Bacteria	Proteobacteria	Gammaproteobacteria	Cellvibrionales	Halieaceae	Luminiphilus	uncultured_marine
Taxa_2517	Bacteria	Bacteroidota	Bacteroidia	Chitinophagales	Saprospiraceae	Lewinella	uncultured_marine
Taxa_2521	Bacteria	Proteobacteria	Alphaproteobacteria	Caulobacterales	Caulobacteraceae	Caulobacter	Caulobacter_vibrioides
Taxa_2523	Bacteria	Proteobacteria	Gammaproteobacteria	Polyangiales	Polyangiaceae	Pajaroellobacter	uncultured_bacterium
Taxa_2524	Bacteria	Proteobacteria	Alphaproteobacteria	Caulobacterales	Hyphomonadaceae	Maricaulis	uncultured_bacterium
Taxa_2529	Bacteria	Proteobacteria	Alphaproteobacteria	Caulobacterales	Hyphomonadaceae	Maricaulis	bacterium_2D703
Taxa_2530	Bacteria	Proteobacteria	Gammaproteobacteria	Alteromonadales	Colwelliaceae	Thalassotalea	Colwelliaceae_bacterium
Taxa_2536	Bacteria	Proteobacteria	Gammaproteobacteria	Legionellales	Legionellaceae	Legionella	Legionella_sp.
Taxa_2537	Bacteria	Proteobacteria	Alphaproteobacteria	Caulobacterales	Caulobacteraceae	Caulobacter	uncultured_Caulobacter
Taxa_2542	Bacteria	Planctomycetota	Phycisphaerae	Phycisphaerales	Phycisphaeraceae	Urania-1B-19_marine_sediment_group	uncultured_bacterium
Taxa_2564	Bacteria	Myxococcota	Polyangia	Nannocystales	Nannocystaceae	uncultured	uncultured_delta
Taxa_2565	Bacteria	Proteobacteria	Alphaproteobacteria	Caulobacterales	Rhizobiaceae	Lentilitoribacter	uncultured_bacterium
Taxa_2566	Bacteria	Bacteroidota	Bacteroidia	Flavobacteriales	Flavobacteriaceae	Algicola	uncultured_gamma
Taxa_2575	Bacteria	Proteobacteria	Gammaproteobacteria	Oceanospirillales	Halomonadaceae	Halomonas	bacterium_35E2
Taxa_2576	Bacteria	Proteobacteria	Gammaproteobacteria	Chromatiales	Chromatiaceae	Achromatium	uncultured_bacterium
Taxa_2577	Bacteria	Proteobacteria	Gammaproteobacteria	Vibrionales	Vibrionaceae	Photobacterium	Photobacterium_profundum
Taxa_2585	Bacteria	Proteobacteria	Alphaproteobacteria	Sphingomonadales	Sphingomonadaceae	Sphingopyxis	Sphingopyxis_terrae
Taxa_2586	Bacteria	Actinobacteriota	Actinobacteria	Kineosporiales	Kineosporiaceae	Kineococcus	uncultured_bacterium
Taxa_2587	Bacteria	Firmicutes	Clostridia	Clostridia_UCG-014	Clostridia_UCG-014	Clostridia_UCG-014	uncultured_bacterium
Taxa_2588	Bacteria	Proteobacteria	Alphaproteobacteria	Rhizobiales	Labraceae	Labrys	uncultured_bacterium
Taxa_2589	Bacteria	Proteobacteria	Alphaproteobacteria	SAR11_clade	uncultured	uncultured	uncultured_bacterium
Taxa_2590	Bacteria	Proteobacteria	Gammaproteobacteria	Nitrosococcales	Methylophagaceae	Methylophaga	Methylophaga_sp.
Taxa_2591	Bacteria	Bacteroidota	Bacteroidia	Sphingobacteriales	Lentimicrobiaceae	Lentimicrobium	uncultured_Bacteroidetes
Taxa_2592	Bacteria	Proteobacteria	Alphaproteobacteria	Rhodobacterales	Rhodobacteraceae	Pacificibacter	Pacificibacter_marinus
Taxa_2593	Bacteria	Bacteroidota	Bacteroidia	Bacteroidales	F082	F082	uncultured_bacterium
Taxa_2594	Bacteria	Proteobacteria	Alphaproteobacteria	Rhodobacterales	Rhodobacteraceae	Roseovarius	Ruegeria_sp.
Taxa_2595	Bacteria	Proteobacteria	Alphaproteobacteria	Rhodobacterales	Rhodobacteraceae	Tateyamaria	bacterium_RCC
Taxa_2596	Bacteria	Firmicutes	Clostridia	Oscillospirales	Oscillospiraceae	UCG-005	uncultured_bacterium
Taxa_2597	Bacteria	Proteobacteria	Gammaproteobacteria	Burkholderiales	Comamonadaceae	Limnobacter	uncultured_bacterium
Taxa_2598	Bacteria	Proteobacteria	Alphaproteobacteria	Rhizobiales	Stappiaceae	Stappiaceae	uncultured_bacterium
Taxa_2599	Bacteria	Proteobacteria	Gammaproteobacteria	Burkholderiales	Comamonadaceae	Noviherbaspirillum	Alligator_sinensis
Taxa_2600	Bacteria	Spirochaetota	Spirochaetia	Spirochaetales	Spirochaetaceae	Treponema	uncultured_bacterium
Taxa_2603	Bacteria	Bacteroidota	Bacteroidia	Flavobacteriales	Flavobacteriaceae	Polaribacter	Tenacibaculum_maritimum
Taxa_2607	Bacteria	Proteobacteria	Gammaproteobacteria	Burkholderiales	Comamonadaceae	MWH-UniP1_aquatic_group	uncultured_bacterium
Taxa_2608	Bacteria	Actinobacteriota	Actinobacteria	Bifidobacteriales	Bifidobacteriaceae	Bifidobacterium	Bifidobacterium_pseudocatenulatum
Taxa_2615	Bacteria	Actinobacteriota	Actinobacteria	Corynebacteriales	Corynebacteriaceae	Corynebacterium	Corynebacterium_lipophiloflavum
Taxa_2616	Bacteria	Marinimicrobia_(SAR406_clade)	Marinimicrobia_(SAR406_clade)	Marinimicrobia_(SAR406_clade)	Marinimicrobia_(SAR406_clade)	Marinimicrobia_(SAR406_clade)	marine_metagenome
Taxa_2617	Bacteria	Bacteroidota	Bacteroidia	Chitinophagales	Saprospiraceae	uncultured	uncultured_Sphingobacteriia
Taxa_2618	Bacteria	Firmicutes	Bacilli	Thermicanales	Thermicanaceae	Thermicanus	uncultured_bacterium
Taxa_2619	Bacteria	Proteobacteria	Gammaproteobacteria	Xanthomonadales	Xanthomonadaceae	Pseudoxanthomonas	uncultured_bacterium
Taxa_2620	Bacteria	Firmicutes	Bacilli	Lactobacillales	Lactobacillaceae	Lactobacillus	Lactobacillus_buchneri
Taxa_2621	Bacteria	Proteobacteria	Gammaproteobacteria	Burkholderiales	Thiotrichaceae	Thiothrix	uncultured_bacterium
Taxa_2622	Bacteria	Proteobacteria	Alphaproteobacteria	Rhodobacterales	Rhodobacteraceae	Rhodovulum	Rhodovulum_sp.
Taxa_2623	Bacteria	Proteobacteria	Gammaproteobacteria	Burkholderiales	Comamonadaceae	Variovorax	uncultured_bacterium
Taxa_2624	Bacteria	Proteobacteria	Gammaproteobacteria	Alteromonadales	Thiotrichaceae	uncultured	uncultured_bacterium
Taxa_2625	Bacteria	Firmicutes	Clostridia	Eubacteriales	Alkalibacteraceae	Alkalibacter	uncultured_bacterium
Taxa_2626	Bacteria	Proteobacteria	Gammaproteobacteria	Cellvibrionales	Cellvibrionaceae	Pseudoteredinibacter	uncultured_bacterium
Taxa_2627	Bacteria	Verrucomicrobiota	Verrucomicrobiae	Opitutales	Puniceicoccaceae	Lentimonas	uncultured_Verrucomicrobiales
Taxa_2628	Bacteria	Proteobacteria	Alphaproteobacteria	Caulobacterales	Parvularculaceae	Amphiplicatus	uncultured_bacterium
Taxa_2629	Bacteria	Firmicutes	Bacilli	Lactobacillales	Enterococcaceae	Tetragenococcus	Tetragenococcus_halophilus
Taxa_2631	Bacteria	Proteobacteria	Gammaproteobacteria	Pseudomonadales	Pseudomonadaceae	uncultured	uncultured_bacterium
Taxa_2636	Bacteria	Deinococcota	Deinococci	Deinococcales	Deinococcaceae	Deinococcus	Deinococcus_sp.
Taxa_2639	Bacteria	Bacteroidota	Bacteroidia	Cytophagales	Spirosomaceae	Spirosoma	Spirosoma_lacussanchae
Taxa_2642	Bacteria	Firmicutes	Desulfitobacteriia	Desulfitobacteriales	uncultured	uncultured	uncultured_bacterium
Taxa_2643	Bacteria	Proteobacteria	Gammaproteobacteria	Burkholderiales	Oxalobacteraceae	Oxalicibacterium	uncultured_bacterium
Taxa_2646	Bacteria	Firmicutes	Clostridia	Lachnospirales	Lachnospiraceae	Lachnoanaerobaculum	uncultured_bacterium
Taxa_2653	Bacteria	Proteobacteria	Alphaproteobacteria	Rhizobiales	Rhizobiales_Incertae_Sedis	Allorhizobium-Neorhizobium-Pararhizobium-Rhizobium	Allorhizobium_vitis
Taxa_2654	Bacteria	Proteobacteria	Gammaproteobacteria	Oceanospirillales	Alcanivoracaceae1	Alcanivorax	Alcanivorax_pacificus
Taxa_2659	Bacteria	Proteobacteria	Gammaproteobacteria	Oceanospirillales	Proteobacteria	Proteobacteria	uncultured_bacterium
Taxa_2668	Bacteria	Proteobacteria	Alphaproteobacteria	Sphingomonadales	Sphingomonadaceae	Altererythrobacter	Erythrobacter_sp.
Taxa_2669	Bacteria	Bdellovibrionota	Bdellovibrionia	Bacteriovoracales	Bacteriovoracaceae	Peredibacter	Bacteriovorax_sp.
Taxa_2670	Bacteria	Proteobacteria	Alphaproteobacteria	Kordiimonadales	Iodidimonadaceae	Iodidimonas	uncultured_bacterium
Taxa_2673	Bacteria	Proteobacteria	Alphaproteobacteria	Rhodobacterales	Rhodobacteraceae	Pseudahrensia	uncultured_bacterium
Taxa_2675	Bacteria	Proteobacteria	Alphaproteobacteria	Rickettsiales	SM2D12	uncultured	uncultured_organism
Taxa_2677	Bacteria	Proteobacteria	Gammaproteobacteria	Nitrosococcales	Nitrosococcaceae	Nitrosococcus	Nitrosococcus_halophilus
Taxa_2678	Bacteria	Bdellovibrionota	Bdellovibrionia	Bdellovibrionales	Bdellovibrionaceae	Bdellovibrio	uncultured_delta
Taxa_2679	Bacteria	Proteobacteria	Gammaproteobacteria	Oceanospirillales	Nitrincolaceae	Neptunomonas	Neptunomonas_japonica
Taxa_2680	Bacteria	Bacteroidota	Bacteroidia	Flavobacteriales	Cryomorphaceae	uncultured	uncultured_Bacteroidetes
Taxa_2681	Bacteria	Patescibacteria	Gracilibacteria	JGI_0000069-P22	JGI_0000069-P22	JGI_0000069-P22	uncultured_Microgenomates
Taxa_2682	Bacteria	Proteobacteria	Gammaproteobacteria	OM182_clade	OM182_clade	OM182_clade	uncultured_bacterium
Taxa_2683	Bacteria	Bacteroidota	Bacteroidia	Cytophagales	Cyclobacteriaceae	uncultured	uncultured_organism
Taxa_2684	Bacteria	Spirochaetota	Spirochaetia	Spirochaetales	Spirochaetaceae	uncultured	uncultured_soil
Taxa_2685	Bacteria	Bacteroidota	Bacteroidia	Cytophagales	Cyclobacteriaceae	Reichenbachiella	uncultured_bacterium
Taxa_2686	Bacteria	Proteobacteria	Alphaproteobacteria	Rhodobacterales	Rhodobacteraceae	Amylibacter	Amylibacter_sp.
Taxa_2687	Bacteria	Proteobacteria	Gammaproteobacteria	Thiotrichales	Thiotrichaceae	Thiothrix	uncultured_Thiothrix
Taxa_2688	Bacteria	Proteobacteria	Gammaproteobacteria	Alteromonadales	Colwelliaceae	Thalassomonas	Thalassomonas_viridans
Taxa_2689	Bacteria	Proteobacteria	Gammaproteobacteria	Ectothiorhodospirales	Ectothiorhodospiraceae	Endozoicomonas	uncultured_bacterium
Taxa_2690	Bacteria	Proteobacteria	Alphaproteobacteria	Rhodobacterales	Rhodobacteraceae	Roseovarius	Roseovarius_sp.
Taxa_2691	Bacteria	Proteobacteria	Alphaproteobacteria	Rhodobacterales	Rhodobacteraceae	Litoreibacter	uncultured_bacterium
Taxa_2692	Bacteria	Cyanobacteria	Cyanobacteriia	Thermosynechococcales	Acaryochloridaceae	Acaryochloris_MBIC11017	Acaryochloris_marina
Taxa_2693	Bacteria	Proteobacteria	Gammaproteobacteria	Cellvibrionales	Spongiibacteraceae	Sinobacterium	uncultured_bacterium
Taxa_2694	Bacteria	Proteobacteria	Gammaproteobacteria	Alteromonadales	Colwelliaceae	Thalassotalea	Thalassotalea_crassostreae
Taxa_2695	Bacteria	Myxococcota	Polyangia	Polyangiales	Sandaracinaceae	uncultured	uncultured_Myxococcales
Taxa_2696	Bacteria	Proteobacteria	Gammaproteobacteria	Gammaproteobacteria_Incertae_Sedis	Unknown_Family	uncultured	uncultured_gamma
Taxa_2697	Bacteria	Proteobacteria	Alphaproteobacteria	Parvibaculales	Parvibaculaceae	uncultured	uncultured_Alphaproteobacteria
Taxa_2698	Bacteria	Bacteroidota	Bacteroidia	Flavobacteriales	Crocinitomicaceae	uncultured	uncultured_Bacteroidetes/Chlorobi
Taxa_2699	Bacteria	Bacteroidota	Bacteroidia	Flavobacteriales	Flavobacteriaceae	Flavicella	uncultured_Flavobacteriaceae
Taxa_2700	Bacteria	Bacteroidota	Bacteroidia	Flavobacteriales	Flavobacteriaceae	Tenacibaculum	Tenacibaculum_ovolyticum
Taxa_2701	Bacteria	Proteobacteria	Gammaproteobacteria	Thiomicrospirales	Thioglobaceae	SUP05_cluster	bacterium_thiotrophic
Taxa_2702	Bacteria	Campilobacterota	Campylobacteria	Campylobacterales	Arcobacteraceae	Poseidonibacter	uncultured_bacterium
Taxa_2703	Bacteria	Proteobacteria	Alphaproteobacteria	Sphingomonadales	Sphingomonadaceae	Hyphomonas	uncultured_bacterium
Taxa_2704	Bacteria	Proteobacteria	Gammaproteobacteria	Rhodospirillales	Magnetospiraceae	uncultured	uncultured_bacterium
Taxa_2705	Bacteria	Bdellovibrionota	Bdellovibrionia	Bdellovibrionales	Bdellovibrionaceae	Bdellovibrio	uncultured_organism
Taxa_2706	Bacteria	Proteobacteria	Gammaproteobacteria	Alteromonadales	Granulosicoccaceae	Granulosicoccus	uncultured_bacterium
Taxa_2707	Bacteria	Proteobacteria	Alphaproteobacteria	Rhizobiales	Rhizobiaceae	Octadecabacter	Octadecabacter_temperatus
Taxa_2708	Bacteria	Proteobacteria	Gammaproteobacteria	Enterobacterales	Morganellaceae	endosymbionts	Candidatus_Kotejella
Taxa_2709	Bacteria	Proteobacteria	Alphaproteobacteria	Thiomicrospirales	Thiomicrospiraceae	Thiomicrorhabdus	uncultured_bacterium
Taxa_2710	Bacteria	Patescibacteria	Gracilibacteria	JGI_0000069-P22	JGI_0000069-P22	JGI_0000069-P22	bioreactor_metagenome
Taxa_2711	Bacteria	Bacteroidota	Bacteroidia	Flavobacteriales	Flavobacteriaceae	Pseudozobellia	uncultured_bacterium
Taxa_2712	Bacteria	Proteobacteria	Gammaproteobacteria	Francisellales	Francisellaceae	Francisella	uncultured_bacterium
Taxa_2714	Bacteria	Proteobacteria	Gammaproteobacteria	Oceanospirillales	Nitrincolaceae	Neptunomonas	bacterium_endosymbiont
Taxa_2716	Bacteria	Proteobacteria	Alphaproteobacteria	Rhodobacterales	Rhodobacteraceae	Rhodobacteraceae	Oceanicola_sp.
Taxa_2722	Bacteria	Proteobacteria	Alphaproteobacteria	Rhizobiales	Devosiaceae	Pelagibacterium	uncultured_bacterium
Taxa_2724	Bacteria	Proteobacteria	Gammaproteobacteria	Ectothiorhodospirales	Ectothiorhodospiraceae	Thioalkalivibrio	uncultured_bacterium
Taxa_2727	Bacteria	Cyanobacteria	Cyanobacteriia	Synechococcales	Cyanobiaceae	Prochlorococcus_MIT9313	uncultured_bacterium
Taxa_2729	Bacteria	Bacteroidota	Bacteroidia	Flavobacteriales	Flavobacteriaceae	Polaribacter	Polaribacter_butkevichii
Taxa_2731	Bacteria	Proteobacteria	Alphaproteobacteria	Rhodobacterales	Rhodobacteraceae	Octadecabacter	Octadecabacter_sp.
Taxa_2736	Bacteria	Proteobacteria	Gammaproteobacteria	SAR86_clade	SAR86_clade	uncultured	uncultured_bacterium
Taxa_2739	Bacteria	Proteobacteria	Gammaproteobacteria	Alteromonadales	Shewanellaceae	Ferrimonas	uncultured_bacterium
Taxa_2740	Bacteria	Proteobacteria	Gammaproteobacteria	Chromatiales	Chromatiaceae	uncultured	uncultured_bacterium
Taxa_2741	Bacteria	Proteobacteria	Gammaproteobacteria	Sphingomonadales	Sphingomonadaceae	uncultured	uncultured_bacterium
Taxa_2745	Bacteria	Proteobacteria	Alphaproteobacteria	Micropepsales	Micropepsaceae	uncultured	uncultured_bacterium
Taxa_2748	Bacteria	Proteobacteria	Gammaproteobacteria	Burkholderiales	Oxalobacteraceae	CM1G08	uncultured_bacterium
Taxa_2749	Bacteria	Proteobacteria	Gammaproteobacteria	JG36-GS-52	JG36-GS-52	JG36-GS-52	uncultured_bacterium
Taxa_2752	Bacteria	Proteobacteria	Gammaproteobacteria	Xanthomonadales	Xanthomonadaceae	Xanthomonadaceae	uncultured_bacterium
Taxa_2758	Bacteria	Proteobacteria	Alphaproteobacteria	Rhodospirillales	Rickettsiaceae	uncultured	uncultured_bacterium
Taxa_2769	Bacteria	Desulfobacterota	Desulfovibrionia	Desulfovibrionales	Desulfovibrionaceae	Desulfovibrio	uncultured_bacterium
Taxa_2771	Bacteria	Proteobacteria	Alphaproteobacteria	Rhodobacterales	Rhodobacteraceae	Sulfurovum	uncultured_bacterium
Taxa_2776	Bacteria	Proteobacteria	Alphaproteobacteria	Sphingomonadales	Sphingomonadaceae	Rhizorhapis	uncultured_bacterium
Taxa_2778	Bacteria	Bacteroidota	Bacteroidia	Flavobacteriales	Flavobacteriaceae	Gramella	Gramella_portivictoriae
Taxa_2781	Bacteria	Proteobacteria	Gammaproteobacteria	Alteromonadales	Shewanellaceae	Ferrimonas	Ferrimonas_sp.
Taxa_2782	Bacteria	Bdellovibrionota	Bdellovibrionia	Bdellovibrionales	Bdellovibrionaceae	Bdellovibrio	unidentified
Taxa_2784	Bacteria	Proteobacteria	Alphaproteobacteria	Rhizobiales	Rhizobiaceae	Brucella	Brucella_melitensis
Taxa_2785	Bacteria	Desulfobacterota	Desulfuromonadia	PB19	PB19	PB19	uncultured_marine
Taxa_2786	Bacteria	Proteobacteria	Alphaproteobacteria	Caulobacterales	Parvularculaceae	Hyphococcus	uncultured_organism
Taxa_2794	Bacteria	Proteobacteria	Gammaproteobacteria	Alteromonadales	Colwelliaceae	Colwellia	Colwellia_psychrerythraea
Taxa_2795	Bacteria	Bacteroidota	Bacteroidia	Chitinophagales	Chitinophagaceae	Vibrionimonas	uncultured_bacterium
Taxa_2799	Bacteria	Proteobacteria	Gammaproteobacteria	Thiotrichales	Thiotrichaceae	Thiotrichaceae	uncultured_bacterium
Taxa_2804	Bacteria	Proteobacteria	Gammaproteobacteria	Aeromonadales	Aeromonadaceae	Zobellella	Zobellella_maritima
Taxa_2810	Bacteria	Proteobacteria	Gammaproteobacteria	Enterobacterales	Yersiniaceae	Serratia	Serratia_marcescens
Taxa_2813	Bacteria	Proteobacteria	Gammaproteobacteria	Alteromonadales	Cellvibrionaceae	Cellvibrionaceae	uncultured_bacterium
Taxa_2814	Bacteria	Proteobacteria	Alphaproteobacteria	Rickettsiales	Rickettsiaceae	uncultured	metagenome
Taxa_2815	Bacteria	Proteobacteria	Alphaproteobacteria	Rhizobiales	Rhizobiaceae	Hyphomicrobium	uncultured_bacterium
Taxa_2817	Bacteria	Proteobacteria	Alphaproteobacteria	Caulobacterales	Parvularculaceae	uncultured	uncultured_bacterium
Taxa_2818	Bacteria	Proteobacteria	Gammaproteobacteria	Vibrionales	Vibrionaceae	Salinivibrio	Salinivibrio_sp.
Taxa_2820	Bacteria	Proteobacteria	Gammaproteobacteria	Oceanospirillales	Saccharospirillaceae	Thalassolituus	Bacterioplanes_sanyensis
Taxa_2823	Bacteria	Proteobacteria	Alphaproteobacteria	Rhizobiales	Thalassospiraceae	Thalassospira	uncultured_bacterium
Taxa_2824	Bacteria	Proteobacteria	Gammaproteobacteria	CH2b56	CH2b56	CH2b56	uncultured_bacterium
Taxa_2825	Bacteria	Proteobacteria	Alphaproteobacteria	Oceanospirillales	Alcanivoracaceae1	Alcanivorax	uncultured_Alcanivorax
Taxa_2830	Bacteria	Desulfobacterota	Desulfovibrionia	Desulfovibrionales	Desulfovibrionaceae	Desulfovibrio	uncultured_proteobacterium
Taxa_2833	Bacteria	Proteobacteria	Alphaproteobacteria	Thiotrichales	Thiotrichaceae	Leucothrix	uncultured_bacterium
Taxa_2839	Bacteria	Bacteroidota	Bacteroidia	Flavobacteriales	Weeksellaceae	Bergeyella	uncultured_bacterium
Taxa_2840	Bacteria	Proteobacteria	Gammaproteobacteria	Steroidobacterales	Woeseiaceae	uncultured	uncultured_gamma
Taxa_2841	Bacteria	Proteobacteria	Alphaproteobacteria	Rhodobacterales	Rhodobacteraceae	Rhodobaculum	uncultured_bacterium
Taxa_2842	Bacteria	Planctomycetota	Phycisphaerae	Phycisphaerales	Phycisphaeraceae	FS140-16B-02_marine_group	uncultured_bacterium
Taxa_2843	Bacteria	Proteobacteria	Gammaproteobacteria	Alteromonadales	Arcobacteraceae	uncultured	uncultured_bacterium
Taxa_2844	Bacteria	Planctomycetota	Phycisphaerae	Phycisphaerales	Phycisphaeraceae	FS140-16B-02_marine_group	uncultured_planctomycete
Taxa_2845	Bacteria	Bacteroidota	Bacteroidia	Flavobacteriales	Flavobacteriaceae	Algibacter	Algibacter_lectus
Taxa_2846	Bacteria	Proteobacteria	Alphaproteobacteria	Rhizobiales	Hyphomicrobiaceae	Hyphomicrobium	uncultured_Hyphomicrobiaceae
Taxa_2847	Bacteria	Actinobacteriota	Actinobacteria	Micrococcales	Intrasporangiaceae	Janibacter	uncultured_bacterium
Taxa_2848	Bacteria	Proteobacteria	Gammaproteobacteria	Enterobacterales	Enterobacteriaceae	Plesiomonas	uncultured_bacterium
Taxa_2849	Bacteria	Firmicutes	Clostridia	Oscillospirales	Ruminococcaceae	Faecalibacterium	uncultured_organism
Taxa_2850	Bacteria	Proteobacteria	Alphaproteobacteria	KI89A_clade	KI89A_clade	KI89A_clade	uncultured_marine
Taxa_2851	Bacteria	Proteobacteria	Gammaproteobacteria	Alteromonadales	Alteromonadaceae	Glaciecola	Aliiglaciecola_sp.
Taxa_2852	Bacteria	Proteobacteria	Alphaproteobacteria	Sphingomonadales	Sphingomonadaceae	Erythrobacter	Sphingomonas_phyllosphaerae
Taxa_2853	Bacteria	Acidobacteriota	Holophagae	Acanthopleuribacterales	Acanthopleuribacteraceae	Acanthopleuribacter	uncultured_bacterium
Taxa_2854	Bacteria	Firmicutes	Bacilli	Staphylococcales	Staphylococcaceae	Jeotgalicoccus	Jeotgalicoccus_huakuii
Taxa_2855	Bacteria	Proteobacteria	Alphaproteobacteria	Rhodobacterales	Rhodobacteraceae	Yoonia-Loktanella	Thalassobium_sp.
Taxa_2856	Bacteria	Desulfobacterota	Desulfovibrionia	Desulfovibrionales	Desulfovibrionaceae	Mailhella	uncultured_rumen
Taxa_2857	Bacteria	Proteobacteria	Gammaproteobacteria	Burkholderiales	Neisseriaceae	Neisseria	Neisseria_bacilliformis
Taxa_2858	Bacteria	Bacteroidota	Bacteroidia	Bacteroidales	Rikenellaceae	Alistipes	uncultured_bacterium
Taxa_2859	Bacteria	Proteobacteria	Gammaproteobacteria	Burkholderiales	Alcaligenaceae	Pigmentiphaga	uncultured_bacterium
Taxa_2860	Bacteria	Gemmatimonadota	BD2-11_terrestrial_group	BD2-11_terrestrial_group	BD2-11_terrestrial_group	BD2-11_terrestrial_group	uncultured_deep-sea
Taxa_2861	Bacteria	Firmicutes	Clostridia	Christensenellales	Christensenellaceae	Christensenella	Christensenella_minuta
Taxa_2864	Bacteria	Proteobacteria	Alphaproteobacteria	Sphingomonadales	Sphingomonadaceae	Erythrobacter	Sphingomonas_sp.
Taxa_2867	Bacteria	Actinobacteriota	Actinobacteria	Micrococcales	Brevibacteriaceae	Brevibacterium	Brevibacterium_sp.
Taxa_2868	Bacteria	Proteobacteria	Gammaproteobacteria	Alteromonadales	Aeromonadaceae	Oceanisphaera	uncultured_bacterium
Taxa_2874	Bacteria	Firmicutes	Clostridia	Lachnospirales	Lachnospiraceae	Marvinbryantia	uncultured_bacterium
Taxa_2876	Bacteria	Bacteroidota	Bacteroidia	Sphingobacteriales	Sphingobacteriaceae	Sphingobacterium	Sphingobacterium_mizutaii
Taxa_2883	Bacteria	Bdellovibrionota	Oligoflexia	0319-6G20	0319-6G20	0319-6G20	metagenome
Taxa_2884	Bacteria	Deinococcota	Deinococci	Deinococcales	Deinococcaceae	Deinococcus	uncultured_bacterium
Taxa_2885	Bacteria	Proteobacteria	Gammaproteobacteria	Burkholderiales	Burkholderiaceae	Limnobacter	uncultured_organism
Taxa_2886	Bacteria	Proteobacteria	Alphaproteobacteria	Rhodobacterales	Rhodobacteraceae	Escherichia-Shigella	uncultured_bacterium
Taxa_2887	Bacteria	Firmicutes	Bacilli	Lactobacillales	Streptococcaceae	Streptococcus	Streptococcus_anginosus
Taxa_2888	Bacteria	Actinobacteriota	Actinobacteria	Bifidobacteriales	Bifidobacteriaceae	Bifidobacterium	Bifidobacterium_angulatum
Taxa_2889	Bacteria	Firmicutes	Bacilli	Bacillales	Bacillaceae	Aeribacillus	Aeribacillus_pallidus
Taxa_2891	Bacteria	Proteobacteria	Alphaproteobacteria	Rhizobiales	Rhizobiaceae	Ensifer	Ensifer_meliloti
Taxa_2893	Bacteria	Proteobacteria	Alphaproteobacteria	Methylococcales	Cycloclasticaceae	uncultured	uncultured_bacterium
Taxa_2894	Bacteria	Proteobacteria	Gammaproteobacteria	Pseudomonadales	Moraxellaceae	Moraxella	uncultured_bacterium
Taxa_2895	Bacteria	Proteobacteria	Alphaproteobacteria	Rhizobiales	Rhizobiaceae	Allorhizobium-Neorhizobium-Pararhizobium-Rhizobium	Agrobacterium_radiobacter
Taxa_2896	Bacteria	Proteobacteria	Gammaproteobacteria	Alteromonadales	Rhodobacteraceae	Leisingera	uncultured_bacterium
Taxa_2905	Bacteria	Proteobacteria	Alphaproteobacteria	Bdellovibrionales	Bdellovibrionaceae	OM27_clade	uncultured_delta
Taxa_2906	Bacteria	Actinobacteriota	Actinobacteria	Micrococcales	Dermacoccaceae	Dermacoccus	uncultured_bacterium
Taxa_2908	Bacteria	Proteobacteria	Gammaproteobacteria	Burkholderiales	Burkholderiaceae	Cupriavidus	uncultured_bacterium
Taxa_2912	Bacteria	Proteobacteria	Alphaproteobacteria	Alteromonadales	uncultured	uncultured	uncultured_bacterium
Taxa_2915	Bacteria	Proteobacteria	Gammaproteobacteria	Caulobacterales	Hyphomonadaceae	Thalassotalea	uncultured_bacterium
Taxa_2922	Bacteria	Proteobacteria	Alphaproteobacteria	Rhodobacterales	Rhodobacteraceae	Sulfitobacter	Loktanella_sp.
Taxa_2925	Bacteria	Proteobacteria	Alphaproteobacteria	Caulobacterales	Hyphomonadaceae	Fretibacter	uncultured_bacterium
Taxa_2929	Bacteria	Proteobacteria	Gammaproteobacteria	Arenicellales	Arenicellaceae	Perspicuibacter	uncultured_bacterium
Taxa_2930	Bacteria	Proteobacteria	Gammaproteobacteria	Diplorickettsiales	Diplorickettsiaceae	uncultured	uncultured_Legionellales
Taxa_2931	Bacteria	Desulfobacterota	Desulfobacteria	Desulfobacterales	Desulfosarcinaceae	Sva0081_sediment_group	uncultured_delta
Taxa_2932	Bacteria	Proteobacteria	Gammaproteobacteria	Granulosicoccales	Granulosicoccaceae	Granulosicoccus	uncultured_bacterium
Taxa_2934	Bacteria	Proteobacteria	Alphaproteobacteria	Rhodobacterales	Rhodobacteraceae	Planktotalea	Roseovarius_pelophilus
Taxa_2935	Bacteria	Proteobacteria	Gammaproteobacteria	Chromatiales	Chromatiaceae	Thiohalocapsa	uncultured_gamma
Taxa_2936	Bacteria	Proteobacteria	Gammaproteobacteria	Cellvibrionales	Spongiibacteraceae	uncultured	Oceanicoccus_sp.
Taxa_2937	Bacteria	Bacteroidota	Bacteroidia	Flavobacteriales	Flavobacteriaceae	Lutimonas	uncultured_bacterium
Taxa_2939	Bacteria	Bacteroidota	Bacteroidia	Flavobacteriales	Crocinitomicaceae	Crocinitomix	Crocinitomix_sp.
Taxa_2940	Bacteria	Proteobacteria	Gammaproteobacteria	Ga0077536	Ga0077536	Ga0077536	uncultured_gamma
Taxa_2941	Bacteria	Firmicutes	Bacilli	Calditrichales	Calditrichaceae	Calditrichaceae	uncultured_Deferribacteres
Taxa_2942	Bacteria	Desulfobacterota	Desulfobulbia	Desulfobulbales	Desulfocapsaceae	Desulforhopalus	uncultured_delta
Taxa_2943	Bacteria	Proteobacteria	Alphaproteobacteria	Rhodobacterales	Rhodobacteraceae	Pseudorhodobacter	Rhodobacter_sp.
Taxa_2944	Bacteria	Bacteroidota	Bacteroidia	Flavobacteriales	Flavobacteriaceae	Actibacter	uncultured_bacterium
Taxa_2945	Bacteria	Planctomycetota	Pla3_lineage	Pla3_lineage	Pla3_lineage	Pla3_lineage	uncultured_bacterium
Taxa_2946	Bacteria	Proteobacteria	Gammaproteobacteria	Salinisphaerales	Solimonadaceae	Hydrocarboniphaga	uncultured_bacterium
Taxa_2947	Bacteria	Proteobacteria	Gammaproteobacteria	BD7-8	BD7-8	BD7-8	uncultured_bacterium
Taxa_2948	Bacteria	Proteobacteria	Alphaproteobacteria	Rhodobacterales	Rhodobacteraceae	Halocynthiibacter	Halocynthiibacter_namhaensis
Taxa_2949	Bacteria	Firmicutes	Bacilli	Bacillales	Bacillaceae	Sinibacillus	uncultured_bacterium
Taxa_2950	Bacteria	Proteobacteria	Alphaproteobacteria	Rhodospirillales	AEGEAN-169_marine_group	uncultured	uncultured_bacterium
Taxa_2951	Bacteria	Proteobacteria	Alphaproteobacteria	Desulfatiglandales	Desulfatiglandaceae	uncultured	uncultured_bacterium
Taxa_2952	Bacteria	Myxococcota	Polyangia	Polyangiales	Sandaracinaceae	uncultured	uncultured_soil
Taxa_2953	Bacteria	Proteobacteria	Alphaproteobacteria	Rhodobacterales	Rhodobacteraceae	Roseivivax	uncultured_bacterium
Taxa_2958	Bacteria	Proteobacteria	Gammaproteobacteria	Burkholderiales	Methylophilaceae	OM43_clade	uncultured_OM43
Taxa_2960	Bacteria	Proteobacteria	Alphaproteobacteria	Rickettsiales	SM2D12	SM2D12	metagenome
Taxa_2963	Bacteria	Proteobacteria	Gammaproteobacteria	Cellvibrionales	uncultured	uncultured	uncultured_bacterium
Taxa_2967	Bacteria	Proteobacteria	Alphaproteobacteria	Sphingomonadales	Sphingomonadaceae	Altererythrobacter	uncultured_Alphaproteobacteria
Taxa_2973	Bacteria	Proteobacteria	Gammaproteobacteria	Alteromonadales	Colwelliaceae	Colwellia	Shewanella_hanedai
Taxa_2974	Bacteria	Proteobacteria	Alphaproteobacteria	Rhodospirillales	Magnetospirillaceae	uncultured	uncultured_bacterium
Taxa_2977	Bacteria	Proteobacteria	Alphaproteobacteria	HOC36	uncultured	uncultured	uncultured_bacterium
Taxa_2984	Bacteria	Proteobacteria	Gammaproteobacteria	Cellvibrionales	Halieaceae	Halioglobus	uncultured_gamma
Taxa_2993	Bacteria	Bacteroidota	Bacteroidia	Flavobacteriales	Flavobacteriaceae	Zunongwangia	Zunongwangia_profunda
Taxa_2994	Bacteria	Proteobacteria	Gammaproteobacteria	Enterobacterales	Enterobacteriaceae	Citrobacter	Citrobacter_sp.
Taxa_3002	Bacteria	Proteobacteria	Gammaproteobacteria	Alteromonadales	Alteromonadaceae	Alteromonas	Alteromonas_litorea
Taxa_3003	Bacteria	Proteobacteria	Alphaproteobacteria	Rhizobiales	Hyphomonadaceae	uncultured	uncultured_bacterium
Taxa_3004	Bacteria	Proteobacteria	Alphaproteobacteria	Rickettsiales	AB1	AB1	uncultured_Alphaproteobacteria
Taxa_3005	Bacteria	Verrucomicrobiota	Verrucomicrobiae	Arctic97B-4_marine_group	Arctic97B-4_marine_group	Arctic97B-4_marine_group	uncultured_Verrucomicrobiales
Taxa_3006	Bacteria	Bacteroidota	Bacteroidia	Flavobacteriales	Cryomorphaceae	uncultured	uncultured_marine
Taxa_3007	Bacteria	Proteobacteria	Alphaproteobacteria	Rhizobiales	Rhodobacteraceae	Afifella	uncultured_bacterium
Taxa_3008	Bacteria	Proteobacteria	Gammaproteobacteria	AT-s3-44	AT-s3-44	AT-s3-44	uncultured_Alphaproteobacteria
Taxa_3009	Bacteria	Proteobacteria	Alphaproteobacteria	Rhodobacterales	Rhodobacteraceae	Pseudaestuariivita	unidentified_marine
Taxa_3010	Bacteria	Proteobacteria	Gammaproteobacteria	Coxiellales	Coxiellaceae	Coxiella	uncultured_Legionella
Taxa_3011	Bacteria	Proteobacteria	Gammaproteobacteria	Burkholderiales	Methylophilaceae	T34	uncultured_Burkholderiales
Taxa_3012	Bacteria	Proteobacteria	Gammaproteobacteria	Oceanospirillales	Halieaceae	uncultured	uncultured_gamma
Taxa_3015	Bacteria	Proteobacteria	Gammaproteobacteria	Nitrosococcales	Methylophagaceae	Methylophaga	uncultured_Sphingopyxis
Taxa_3017	Bacteria	Proteobacteria	Gammaproteobacteria	Oceanospirillales	Saccharospirillaceae	Pseudomonas	uncultured_bacterium
Taxa_3020	Bacteria	Proteobacteria	Alphaproteobacteria	Rhizobiales	Rhizobiaceae	uncultured	uncultured_Alphaproteobacteria
Taxa_3022	Bacteria	Bacteroidota	Bacteroidia	Flavobacteriales	Flavobacteriaceae	NS3a_marine_group	uncultured_Formosa
Taxa_3024	Bacteria	Proteobacteria	Alphaproteobacteria	Caulobacterales	Hyphomonadaceae	Hyphomonas	Hyphomonas_sp.
Taxa_3028	Bacteria	Verrucomicrobiota	Verrucomicrobiae	Opitutales	Puniceicoccaceae	Pelagicoccus	uncultured_marine
Taxa_3038	Bacteria	Bacteroidota	Bacteroidia	Cytophagales	Amoebophilaceae	uncultured	uncultured_organism
Taxa_3039	Bacteria	Bacteroidota	Bacteroidia	Cytophagales	Hymenobacteraceae	Hymenobacter	Hymenobacter_sp.
Taxa_3040	Bacteria	Firmicutes	Clostridia	Oscillospirales	Ruminococcaceae	Subdoligranulum	uncultured_bacterium
Taxa_3041	Bacteria	Firmicutes	Clostridia	Lachnospirales	Lachnospiraceae	[Ruminococcus]_torques_group	uncultured_organism
Taxa_3043	Bacteria	Proteobacteria	Alphaproteobacteria	Rhodobacterales	Rhodobacteraceae	Dinoroseobacter	unidentified_marine
Taxa_3044	Bacteria	Firmicutes	Clostridia	Lachnospirales	Lachnospiraceae	Lachnospiraceae_ND3007_group	uncultured_bacterium
Taxa_3045	Bacteria	Proteobacteria	Alphaproteobacteria	Rhodobacterales	Rhodobacteraceae	Sulfurovum	uncultured_marine
Taxa_3046	Bacteria	Proteobacteria	Gammaproteobacteria	Burkholderiales	Burkholderiaceae	Ralstonia	Ralstonia_sp.
Taxa_3047	Bacteria	Firmicutes	Clostridia	Lachnospirales	Lachnospiraceae	Roseburia	uncultured_organism
Taxa_3048	Bacteria	Proteobacteria	Alphaproteobacteria	Acetobacterales	Acetobacteraceae	Acidiphilium	uncultured_bacterium
Taxa_3049	Bacteria	Proteobacteria	Gammaproteobacteria	Xanthomonadales	Thioglobaceae	SUP05_cluster	uncultured_bacterium
Taxa_3050	Bacteria	Proteobacteria	Gammaproteobacteria	Oceanospirillales	Thiotrichaceae	Cocleimonas	uncultured_bacterium
Taxa_3051	Bacteria	Proteobacteria	Gammaproteobacteria	Burkholderiales	Burkholderiaceae	Polynucleobacter	uncultured_beta
Taxa_3052	Bacteria	Proteobacteria	Alphaproteobacteria	Rhodobacterales	Rhodobacteraceae	Palleronia-Pseudomaribius	Pseudomaribius_aestuariivivens
Taxa_3053	Bacteria	Hydrogenedentes	Hydrogenedentia	Hydrogenedentiales	Hydrogenedensaceae	Hydrogenedensaceae	metagenome
Taxa_3054	Bacteria	Proteobacteria	Alphaproteobacteria	Rhodobacterales	Rhodobacteraceae	Aminobacter	uncultured_bacterium
Taxa_3056	Bacteria	Proteobacteria	Gammaproteobacteria	Rhodobacterales	Rhodobacteraceae	Pseudomonas	uncultured_bacterium
Taxa_3061	Bacteria	Proteobacteria	Alphaproteobacteria	Rhodobacterales	Rhodobacteraceae	Amylibacter	Amylibacter_marinus
Taxa_3066	Bacteria	Bacteroidota	Bacteroidia	Cytophagales	Spirosomaceae	Fibrisoma	uncultured_bacterium
Taxa_3068	Bacteria	Proteobacteria	Alphaproteobacteria	Rhodobacterales	Rhodobacteraceae	Roseobacter	Psychromonas_sp.
Taxa_3078	Bacteria	Proteobacteria	Gammaproteobacteria	Alteromonadales	Alteromonadaceae	endosymbionts	uncultured_bacterium
Taxa_3083	Bacteria	Proteobacteria	Gammaproteobacteria	EPR3968-O8a-Bc78	EPR3968-O8a-Bc78	EPR3968-O8a-Bc78	uncultured_bacterium
Taxa_3085	Bacteria	Proteobacteria	Alphaproteobacteria	Rhodobacterales	Rhodobacteraceae	Cereibacter	bacterium
Taxa_3090	Bacteria	Proteobacteria	Alphaproteobacteria	Sphingomonadales	Sphingomonadaceae	Erythrobacter	uncultured_Sphingomonadaceae
Taxa_3095	Bacteria	Proteobacteria	Alphaproteobacteria	Rhodobacterales	Rhodobacteraceae	Desulfovibrio	uncultured_bacterium
Taxa_3097	Bacteria	Proteobacteria	Alphaproteobacteria	Rhizobiales	Rhizobiaceae	Fulvimarina	Fulvimarina_pelagi
Taxa_3098	Bacteria	Proteobacteria	Gammaproteobacteria	Oceanospirillales	Kangiellaceae	Kangiella	uncultured_bacterium
Taxa_3107	Bacteria	Proteobacteria	Gammaproteobacteria	Burkholderiales	Oxalobacteraceae	Noviherbaspirillum	uncultured_bacterium
Taxa_3108	Bacteria	Firmicutes	Clostridia	Lachnospirales	Lachnospiraceae	Blautia	uncultured_organism
Taxa_3109	Bacteria	Acidobacteriota	Blastocatellia	Blastocatellales	Blastocatellaceae	Blastocatella	uncultured_bacterium
Taxa_3110	Bacteria	Bacteroidota	Bacteroidia	Cytophagales	Spirosomaceae	Spirosoma	uncultured_bacterium
Taxa_3111	Bacteria	Bacteroidota	Bacteroidia	Bacteroidales	Porphyromonadaceae	Porphyromonas	uncultured_bacterium
Taxa_3112	Bacteria	Actinobacteriota	Acidimicrobiia	Actinomarinales	Actinomarinaceae	Candidatus_Actinomarina	uncultured_bacterium
Taxa_3113	Bacteria	Proteobacteria	Alphaproteobacteria	Rhizobiales	Rhizobiaceae	Aquamicrobium	uncultured_bacterium
Taxa_3114	Bacteria	Proteobacteria	Gammaproteobacteria	Oceanospirillales	Clade_IV	Clade_IV	uncultured_bacterium
Taxa_3115	Bacteria	Bacteroidota	Bacteroidia	Bacteroidales	Prolixibacteraceae	WCHB1-32	uncultured_bacterium
Taxa_3116	Bacteria	Proteobacteria	Gammaproteobacteria	Pseudomonadales	Moraxellaceae	Acinetobacter	Acinetobacter_radioresistens
Taxa_3117	Bacteria	Marinimicrobia_(SAR406_clade)	Marinimicrobia_(SAR406_clade)	Marinimicrobia_(SAR406_clade)	Marinimicrobia_(SAR406_clade)	Marinimicrobia_(SAR406_clade)	uncultured_marine
Taxa_3118	Bacteria	Actinobacteriota	Thermoleophilia	Gaiellales	uncultured	uncultured	uncultured_bacterium
Taxa_3119	Bacteria	Proteobacteria	Alphaproteobacteria	Rhodobacterales	Rhodobacteraceae	Nereida	uncultured_bacterium
Taxa_3120	Bacteria	Proteobacteria	Gammaproteobacteria	Caulobacterales	Hyphomonadaceae	uncultured	uncultured_bacterium
Taxa_3121	Bacteria	Actinobacteriota	Acidimicrobiia	Microtrichales	Ilumatobacteraceae	Ilumatobacter	Ilumatobacter_nonamiensis
Taxa_3122	Bacteria	Proteobacteria	Alphaproteobacteria	AT-s3-44	AT-s3-44	AT-s3-44	uncultured_bacterium
Taxa_3123	Bacteria	Deinococcota	Deinococci	Deinococcales	Trueperaceae	Truepera	uncultured_bacterium
Taxa_3124	Bacteria	Firmicutes	Clostridia	Oscillospirales	Oscillospiraceae	UCG-002	uncultured_bacterium
Taxa_3125	Bacteria	Bacteroidota	Bacteroidia	Bacteroidales	Prevotellaceae	Prevotella	Prevotella_colorans
Taxa_3126	Bacteria	Acidobacteriota	Blastocatellia	Blastocatellales	Blastocatellaceae	uncultured	uncultured_bacterium
Taxa_3127	Bacteria	Proteobacteria	Alphaproteobacteria	Rhodobacterales	Rhodobacteraceae	Alcanivorax	uncultured_bacterium
Taxa_3128	Bacteria	Bacteroidota	Bacteroidia	Sphingobacteriales	Sphingobacteriaceae	Mucilaginibacter	uncultured_bacterium
Taxa_3129	Bacteria	Proteobacteria	Campylobacteria	Campylobacterales	Sulfurovaceae	Sulfurovum	uncultured_bacterium
Taxa_3139	Bacteria	Deinococcota	Deinococci	Deinococcales	Deinococcaceae	Deinococcus	Deinococcus_geothermalis
Taxa_3142	Bacteria	Proteobacteria	Gammaproteobacteria	Burkholderiales	Oxalobacteraceae	Herminiimonas	uncultured_bacterium
Taxa_3143	Bacteria	Proteobacteria	Alphaproteobacteria	Rhodospirillales	Thalassospiraceae	Thalassospira	alpha_proteobacterium
Taxa_3144	Bacteria	Planctomycetota	Phycisphaerae	Phycisphaerales	Phycisphaeraceae	JL-ETNP-F27	uncultured_planctomycete
Taxa_3147	Bacteria	Actinobacteriota	Actinobacteria	Micrococcales	Dermacoccaceae	Dermacoccus	Dermacoccus_nishinomiyaensis
Taxa_3148	Bacteria	Proteobacteria	Gammaproteobacteria	Nitrosococcales	Nitrosococcaceae	AqS1	uncultured_bacterium
Taxa_3152	Bacteria	Proteobacteria	Gammaproteobacteria	Burkholderiales	Burkholderiaceae	Burkholderia-Caballeronia-Paraburkholderia	uncultured_bacterium
Taxa_3153	Bacteria	Campilobacterota	Campylobacteria	Campylobacterales	Sulfurospirillaceae	Sulfurospirillum	uncultured_bacterium
Taxa_3154	Bacteria	Proteobacteria	Gammaproteobacteria	Rickettsiales	SM2D12	SM2D12	uncultured_bacterium
Taxa_3155	Bacteria	Proteobacteria	Alphaproteobacteria	Rhizobiales	Rhizobiaceae	Martelella	uncultured_bacterium
Taxa_3157	Bacteria	Proteobacteria	Gammaproteobacteria	Pseudomonadales	Pseudomonadaceae	Pseudomonas	Pseudomonas_stutzeri
Taxa_3170	Bacteria	Proteobacteria	Gammaproteobacteria	Burkholderiales	Comamonadaceae	Gallionella	uncultured_bacterium
Taxa_3172	Bacteria	Bacteroidota	Bacteroidia	Flavobacteriales	Cryomorphaceae	NS10_marine_group	uncultured_marine
Taxa_3173	Bacteria	Firmicutes	Clostridia	Peptostreptococcales-Tissierellales	Peptostreptococcales-Tissierellales	Fenollaria	uncultured_bacterium
Taxa_3176	Bacteria	Actinobacteriota	Actinobacteria	Propionibacteriales	Nocardioidaceae	Nocardioides	uncultured_bacterium
Taxa_3178	Bacteria	Proteobacteria	Gammaproteobacteria	SAR86_clade	SAR86_clade	SAR86_clade	uncultured_gamma
Taxa_3182	Bacteria	Proteobacteria	Gammaproteobacteria	Alteromonadales	Alteromonadaceae	Sphingomonas	uncultured_bacterium
Taxa_3190	Bacteria	Proteobacteria	Gammaproteobacteria	Burkholderiales	Methylophilaceae	uncultured	uncultured_bacterium
Taxa_3205	Bacteria	Proteobacteria	Alphaproteobacteria	Rhizobiales	Devosiaceae	Devosia	metagenome
Taxa_3207	Bacteria	Bacteroidota	Bacteroidia	Flavobacteriales	Flavobacteriaceae	Bacteroidetes_VC2.1_Bac22	uncultured_bacterium
Taxa_3208	Bacteria	Proteobacteria	Alphaproteobacteria	Rhizobiales	Rhizobiales_Incertae_Sedis	Phreatobacter	Alphaproteobacteria_bacterium
Taxa_3211	Bacteria	Proteobacteria	Gammaproteobacteria	Methylococcales	Methylomonadaceae	Marine_Methylotrophic_Group_2	uncultured_bacterium
Taxa_3213	Bacteria	Proteobacteria	Gammaproteobacteria	Rhodobacterales	Rhodobacteraceae	uncultured	uncultured_Alphaproteobacteria
Taxa_3222	Bacteria	Proteobacteria	Alphaproteobacteria	Rhodobacterales	Rhodobacteraceae	Rhodobacteraceae	Pseudohalocynthiibacter_aestuariivivens
Taxa_3226	Bacteria	Proteobacteria	Gammaproteobacteria	Cellvibrionales	Halieaceae	Luminiphilus	uncultured_bacterium
Taxa_3251	Bacteria	Proteobacteria	Gammaproteobacteria	Alteromonadales	Colwelliaceae	Thalassotalea	uncultured_gamma
Taxa_3253	Bacteria	Proteobacteria	Alphaproteobacteria	Rhizobiales	Rhizobiaceae	uncultured	uncultured_organism
Taxa_3257	Bacteria	Proteobacteria	Gammaproteobacteria	Burkholderiales	Methylophilaceae	UBA6140	uncultured_bacterium
Taxa_3259	Bacteria	Bacteroidota	Bacteroidia	Bacteroidales	uncultured	uncultured	uncultured_bacterium
Taxa_3262	Bacteria	Bacteroidota	Bacteroidia	Bacteroidales	Prolixibacteraceae	uncultured	uncultured_bacterium
Taxa_3269	Bacteria	Proteobacteria	Alphaproteobacteria	Rhodobacterales	Rhodobacteraceae	Puniceibacterium	Puniceibacterium_antarcticum
Taxa_3270	Bacteria	Proteobacteria	Gammaproteobacteria	Rhodospirillales	Thalassospiraceae	Thalassospira	Nitrosomonas_europaea
Taxa_3274	Bacteria	Proteobacteria	Alphaproteobacteria	Rhodospirillales	Thalassospiraceae	Thalassospira	Thalassospira_povalilytica
Taxa_3278	Bacteria	Proteobacteria	Gammaproteobacteria	Alteromonadales	Shewanellaceae	Ferrimonas	uncultured_gamma
Taxa_3282	Bacteria	Bacteroidota	Bacteroidia	Flavobacteriales	Flavobacteriaceae	Flavobacterium	Flavobacterium_sp.
Taxa_3284	Bacteria	Spirochaetota	Spirochaetia	Spirochaetales	Spirochaetaceae	Treponema	uncultured_Treponema
Taxa_3285	Bacteria	Proteobacteria	Gammaproteobacteria	Cellvibrionales	Halieaceae	Halioglobus	uncultured_bacterium
Taxa_3286	Bacteria	Actinobacteriota	Actinobacteria	Micrococcales	Microbacteriaceae	Amnibacterium	uncultured_bacterium
Taxa_3287	Bacteria	Proteobacteria	Alphaproteobacteria	Rhizobiales	Rhizobiaceae	Hoeflea	uncultured_Alphaproteobacteria
Taxa_3288	Bacteria	Armatimonadota	uncultured	uncultured	uncultured	uncultured	uncultured_bacterium
Taxa_3289	Bacteria	Bacteroidota	Bacteroidia	Chitinophagales	Methylomonadaceae	Methylovulum	uncultured_bacterium
Taxa_3290	Bacteria	Proteobacteria	Alphaproteobacteria	Rhodobacterales	Rhodobacteraceae	Thalassotalea	Thalassomonas_sp.
Taxa_3291	Bacteria	Proteobacteria	Alphaproteobacteria	Rhizobiales	Rhodobacteraceae	Roseobacter	Roseobacter_denitrificans
Taxa_3313	Bacteria	Proteobacteria	Gammaproteobacteria	Desulfuromonadia	Desulfuromonadia	Desulfuromonadia	uncultured_Pelobacter
Taxa_3319	Bacteria	Proteobacteria	Gammaproteobacteria	Thiomicrospirales	Thiomicrospiraceae	endosymbionts	Maorithyas_hadalis
Taxa_3320	Bacteria	Proteobacteria	Gammaproteobacteria	Thiomicrospirales	Pseudohongiellaceae	Pseudohongiella	uncultured_gamma
Taxa_3326	Bacteria	Proteobacteria	Gammaproteobacteria	Acidithiobacillales	Acidithiobacillaceae	TX1A-55	uncultured_bacterium
Taxa_3328	Bacteria	Proteobacteria	Gammaproteobacteria	Alteromonadales	Idiomarinaceae	Idiomarina	Idiomarina_baltica
Taxa_3333	Bacteria	Proteobacteria	Gammaproteobacteria	Alteromonadales	Shewanellaceae	Shewanella	Alcanivorax_sp.
Taxa_3338	Bacteria	Deinococcota	Deinococci	Deinococcales	Deinococcaceae	Deinococcus	Deinococcus_swuensis
Taxa_3339	Bacteria	Proteobacteria	Gammaproteobacteria	Oceanospirillales	Alcanivoracaceae1	Alcanivorax	Colwelliaceae_bacterium
Taxa_3343	Bacteria	Proteobacteria	Gammaproteobacteria	Burkholderiales	B1-7BS	B1-7BS	uncultured_bacterium
Taxa_3349	Bacteria	Proteobacteria	Gammaproteobacteria	Burkholderiales	Oxalobacteraceae	Actimicrobium	uncultured_bacterium
Taxa_3351	Bacteria	Proteobacteria	Alphaproteobacteria	NRL2	NRL2	NRL2	uncultured_Sphingopyxis
Taxa_3354	Bacteria	Proteobacteria	Alphaproteobacteria	Thalassobaculales	Nisaeaceae	Nisaea	uncultured_organism
Taxa_3355	Bacteria	Proteobacteria	Gammaproteobacteria	Oceanospirillales	Alteromonadaceae	Alteromonas	uncultured_bacterium
Taxa_3356	Bacteria	Proteobacteria	Alphaproteobacteria	Rhodobacterales	Rhodobacteraceae	Aquimixticola	uncultured_bacterium
Taxa_3357	Bacteria	Proteobacteria	Alphaproteobacteria	Alteromonadales	Colwelliaceae	Thalassotalea	uncultured_bacterium
Taxa_3361	Bacteria	Desulfobacterota	Desulfovibrionia	Desulfovibrionales	Desulfovibrionaceae	Halodesulfovibrio	uncultured_bacterium
Taxa_3363	Bacteria	Proteobacteria	Gammaproteobacteria	Pseudomonadales	Pseudomonadaceae	Pseudomonas	Pseudomonas_syringae
Taxa_3364	Bacteria	Proteobacteria	Gammaproteobacteria	Sneathiellales	Sneathiellaceae	Sneathiella	Achromatium_minus
Taxa_3365	Bacteria	Proteobacteria	Alphaproteobacteria	Rhodobacterales	Rhodobacteraceae	Pseudophaeobacter	uncultured_Alphaproteobacteria
Taxa_3369	Bacteria	Proteobacteria	Alphaproteobacteria	Rhodobacterales	Rhodobacteraceae	Vibrio	uncultured_bacterium
Taxa_3372	Bacteria	Proteobacteria	Alphaproteobacteria	Puniceispirillales	SAR116_clade	uncultured	uncultured_bacterium
Taxa_3375	Bacteria	Planctomycetota	Planctomycetes	Isosphaerales	Isosphaeraceae	Paludisphaera	Planctomyces_sp.
Taxa_3376	Bacteria	Proteobacteria	Alphaproteobacteria	Kiloniellales	Kiloniellaceae	Pelagibius	uncultured_Alphaproteobacteria
Taxa_3377	Bacteria	Proteobacteria	Gammaproteobacteria	Burkholderiales	Burkholderiaceae	Cupriavidus	Cupriavidus_sp.
Taxa_3378	Bacteria	Actinobacteriota	Actinobacteria	Micrococcales	Intrasporangiaceae	Janibacter	Janibacter_cremeus
Taxa_3379	Bacteria	Proteobacteria	Gammaproteobacteria	Enterobacterales	Enterobacteriaceae	Citrobacter	uncultured_bacterium
Taxa_3380	Bacteria	Proteobacteria	Alphaproteobacteria	Caulobacterales	Hyphomonadaceae	EF100-94H03	uncultured_Alphaproteobacteria
Taxa_3381	Bacteria	Proteobacteria	Alphaproteobacteria	Rhizobiales	Rhizobiaceae	Mesorhizobium	uncultured_Mesorhizobium
Taxa_3382	Bacteria	Proteobacteria	Alphaproteobacteria	Rickettsiales	SM2D12	SM2D12	uncultured_Rhizobiales
Taxa_3383	Bacteria	Desulfobacterota	Desulfuromonadia	uncultured	uncultured	uncultured	bacterium_YC-ZSS-LKJ154
Taxa_3384	Bacteria	Proteobacteria	Alphaproteobacteria	Rhizobiales	Stappiaceae	Rhodothalassium	Rhodothalassium_salexigens
Taxa_3385	Bacteria	Bdellovibrionota	Bdellovibrionia	Bacteriovoracales	Bacteriovoracaceae	Peredibacter	uncultured_delta
Taxa_3386	Bacteria	Proteobacteria	Alphaproteobacteria	Rhizobiales	Stappiaceae	Rhodothalassium	uncultured_bacterium
Taxa_3392	Bacteria	Actinobacteriota	Actinobacteria	Micrococcales	Intrasporangiaceae	Terrabacter	Terrabacter_sp.
Taxa_3398	Bacteria	Proteobacteria	Gammaproteobacteria	Defluviicoccales	uncultured	uncultured	uncultured_bacterium
Taxa_3409	Bacteria	Proteobacteria	Alphaproteobacteria	Rhodospirillales	Thalassospiraceae	Thalassospira	uncultured_proteobacterium
Taxa_3416	Bacteria	Firmicutes	Bacilli	Bacillales	Bacillaceae	Geobacillus	Parageobacillus_toebii
Taxa_3419	Bacteria	Proteobacteria	Gammaproteobacteria	Enterobacterales	Enterobacteriaceae	Trabulsiella	Klebsiella_sp.
Taxa_3423	Bacteria	Proteobacteria	Gammaproteobacteria	PLTA13	PLTA13	PLTA13	uncultured_bacterium
Taxa_3425	Bacteria	Bacteroidota	Bacteroidia	Flavobacteriales	Flavobacteriaceae	Marixanthomonas	Flavobacteriaceae_bacterium
Taxa_3431	Bacteria	Proteobacteria	Gammaproteobacteria	Rhizobiales	Methyloligellaceae	uncultured	uncultured_bacterium
Taxa_3433	Bacteria	Proteobacteria	Alphaproteobacteria	Rhizobiales	Rhizobiaceae	Pseudaminobacter	uncultured_bacterium
Taxa_3434	Bacteria	Firmicutes	Bacilli	Enterobacterales	Enterobacteriaceae	Escherichia-Shigella	uncultured_bacterium
Taxa_3435	Bacteria	Nitrospinota	Nitrospinia	Nitrospinales	Nitrospinaceae	Nitrospina	metagenome
Taxa_3436	Bacteria	Proteobacteria	Alphaproteobacteria	Rhodobacterales	Rhodobacteraceae	Gemmobacter	Gemmobacter_sp.
Taxa_3437	Bacteria	Proteobacteria	Gammaproteobacteria	Oceanospirillales	Halomonadaceae	Cobetia	Loripes_lucinalis
Taxa_3438	Bacteria	Proteobacteria	Gammaproteobacteria	Burkholderiales	Comamonadaceae	Variovorax	uncultured_Burkholderiales
Taxa_3439	Eukaryota	Basidiomycota	Malasseziomycetes	Malasseziales	Malasseziaceae	Malassezia	uncultured_fungus
Taxa_3443	Bacteria	Proteobacteria	Alphaproteobacteria	Rhizobiales	Rhizobiaceae	Ensifer	Sinorhizobium_sp.
Taxa_3450	Bacteria	Proteobacteria	Gammaproteobacteria	Oceanospirillales	Arenicellaceae	HTCC5015	gamma_proteobacterium
Taxa_3451	Bacteria	Proteobacteria	Gammaproteobacteria	JTB23	JTB23	JTB23	uncultured_bacterium
Taxa_3454	Bacteria	Proteobacteria	Gammaproteobacteria	EC3	EC3	EC3	uncultured_gamma
Taxa_3456	Bacteria	Proteobacteria	Gammaproteobacteria	KI89A_clade	KI89A_clade	KI89A_clade	uncultured_bacterium
Taxa_3457	Bacteria	Bacteroidota	Bacteroidia	Cytophagales	Flammeovirgaceae	uncultured	uncultured_bacterium
Taxa_3458	Bacteria	Spirochaetota	Spirochaetia	Spirochaetales	Spirochaetaceae	Treponema	Treponema_vincentii
Taxa_3459	Bacteria	Proteobacteria	Alphaproteobacteria	Rhodobacterales	Rhodobacteraceae	Hirschia	Hirschia_litorea
Taxa_3460	Bacteria	Proteobacteria	Gammaproteobacteria	Thiomicrospirales	Thioglobaceae	uncultured	uncultured_bacterium
Taxa_3461	Bacteria	Verrucomicrobiota	Verrucomicrobiae	Verrucomicrobiales	Rubritaleaceae	Roseibacillus	uncultured_organism
Taxa_3462	Bacteria	Proteobacteria	Gammaproteobacteria	Alteromonadales	Colwelliaceae	Thalassotalea	uncultured_organism
Taxa_3463	Bacteria	Proteobacteria	Alphaproteobacteria	Acetobacterales	Acetobacteraceae	Acidiphilium	uncultured_Alphaproteobacteria
Taxa_3464	Bacteria	Firmicutes	Clostridia	Lachnospirales	Lachnospiraceae	Roseburia	uncultured_bacterium
Taxa_3465	Bacteria	Bacteroidota	Bacteroidia	Cytophagales	Cyclobacteriaceae	Roseivirga	Roseivirga_ehrenbergii
Taxa_3466	Bacteria	Proteobacteria	Gammaproteobacteria	Proteobacteria	Proteobacteria	uncultured	uncultured_bacterium
Taxa_3467	Bacteria	Planctomycetota	Planctomycetes	Planctomycetales	Gimesiaceae	uncultured	uncultured_bacterium
Taxa_3470	Bacteria	Bacteroidota	Bacteroidia	Flavobacteriales	Flavobacteriaceae	NS4_marine_group	marine_metagenome
Taxa_3472	Bacteria	Proteobacteria	Alphaproteobacteria	Rickettsiales	Rickettsiaceae	Rickettsia	Rickettsia_endosymbiont
Taxa_3477	Bacteria	Proteobacteria	Alphaproteobacteria	Caulobacterales	Caulobacteraceae	Brevundimonas	Brevundimonas_bullata
Taxa_3479	Bacteria	Proteobacteria	Gammaproteobacteria	Pseudomonadales	Moraxellaceae	Pseudomonas	uncultured_bacterium
Taxa_3480	Bacteria	Proteobacteria	Alphaproteobacteria	Puniceispirillales	EF100-94H03	EF100-94H03	uncultured_Alphaproteobacteria
Taxa_3492	Bacteria	Acidobacteriota	Vicinamibacteria	Vicinamibacterales	Vicinamibacteraceae	Vicinamibacteraceae	uncultured_Acidobacteriales
Taxa_3493	Bacteria	Proteobacteria	Alphaproteobacteria	Rhodobacterales	Rhodobacteraceae	Rhodobacteraceae	uncultured_gamma
[truncated: 237 more rows]
